# Supplementary material for: Differential patterns of disease and injury in Mozambique: New perspectives from a pragmatic, multicenter, surveillance study of 7809 emergency presentations
Source: PLoS One. 2019 Jul 10;14(7):e0219273. doi: 10.1371/journal.pone.0219273 (PMC6619685; doi:10.1371/journal.pone.0219273)
Supplement: S1 Table — (XLSX) [file pone.0219273.s001.xlsx]

## Sheet: MOZART PRIMARY REPORT DATA
SUBJECT ID	Date of E/S Visit	Admission TIME	SITE ID	AGE	AGE GROUP	GENDER	ETHNICITY	Hx TRADITIONAL MEDICINE	FUEL FOR COOKING/HEATING	Hx_HT	Hx_SMOKER	Hx_HIV	Hx_TB	Hx_MALARIA	Hx_RESPIRATORY DISEASE	Hx_CVD	Hx_TRAUMA	INITIAL COMPLAINT	SBP (mmHg)	DBP (mmHg)	HR (bpm)	O2 SATURATION %	TEMP (CELSIUS)	BMI (Kg/m2)	Unconscious	FR_FOOT	FR_SHIN	FR_KNEE	FR_THIGH	FR_HAND	FR_ELBOW	FR_ARM	FR_SHOULDER	CENTRE_CHEST	FRONT_NECK	FRONT_HEAD	FL_SHOULDER	FL_ARM	FL_ELBOW	FL_HAND	FL_THIGH	FL_KNEE	FL_SHIN	FL_FOOT	FRONT_STOMACH	FL_KIDNEY	FR_KIDNEY	FRONT_GENITALS	BL_FOOT
260278	2017-04-10		2	7	1	0	1	0	MINERAL COAL	1	0	0	0	0	1	0		PAIN LEFT THIGH			114	94	37.1	18.9352	0	0	0	0	1	0	0	0	0	0	0	0	0	0	0	0	0	0	0	0	0	0	0	0	0
240493	2017-04-21		2	8	1	1	1	0		1	0	0	0	1	1	0		COUGH/ANOREXIA			143	90	36.3	13.8889	0	0	0	0	0	0	0	0	0	0	0	0	0	0	0	0	0	0	0	0	0	0	0	0	0
240269	2017-04-10	03:00:00	2	4	1	0	1	0	CHARCOAL	0	0	0	0	0	1	0		FEVER/COUGH			90	95	37.4	10.9375	0	0	0	0	0	0	0	0	0	0	0	0	0	0	0	0	0	0	0	0	0	0	0	0	0
260029	2017-04-02	10:56:00	2	11	1	0	1	0	FIREWOOD	0	0	0	0	0	1	0		COUGH	110	80	112	95	36.6	17.8213	0	0	0	0	0	0	0	0	0	0	0	0	0	0	0	0	0	0	0	0	0	0	0	0	0
260043	2017-04-03	04:00:00	2	7	1	1	1	0	CHARCOAL	0	0	0	0	0	1	0		COUGH/HOT BODY	110	70	80	95	36.8		0	0	0	0	0	0	0	0	0	0	0	0	0	0	0	0	0	0	0	0	0	0	0	0	0
260392	2017-04-16	21:41:00	2	0	1	0	1	0	CHARCOAL	0	0	0	0	0	1	0		DIFFICULTY BREATHING			128	94	37.3	17.2325	0	0	0	0	0	0	0	0	0	0	0	0	0	0	0	0	0	0	0	0	0	0	0	0	0
260470	2017-04-20	13:15:00	2	5	1	1	1	0	CHARCOAL	1	0	1	0	1	1	0		HOT BODY	100	80	156	82	36.6	17.8213	0	0	0	0	0	0	0	0	0	0	0	0	0	0	0	0	0	0	0	0	0	0	0	0	0
260582	2017-04-26	03:15:00	2	10	1	0	1	0	CHARCOAL	0	0	0	0	0	1	0		DIFFICULTY BREATHING	120	70	128	95	36.7	17.301	0	0	0	0	0	0	0	0	0	0	0	0	0	0	0	0	0	0	0	0	0	0	0	0	0
9182131	2017-10-05	11:00:00	2	9	1	0	1	0	CHARCOAL	0	0	1	0	0	1	0		COUGH/HOT BODY	100	80	175	94	36.9	16.7824	0	0	0	0	0	0	0	0	0	0	0	0	0	0	0	0	0	0	0	0	0	0	0	0	0
9182218	2017-10-07	21:08:00	2	11	1	0	1		CHARCOAL				0	0	1	0		DIFFICULTY BREATHING	120	70	74	90	36	14.5455	0	0	0	0	0	0	0	0	0	0	0	0	0	0	0	0	0	0	0	0	0	0	0	0	0
9182341	2017-10-11	05:52:00	2	7	1	0	1	0	CHARCOAL	0	0	0	0	1	1	0		DIFFICULTY BREATHING	112	69	90	80	36.9	14.2222	0	0	0	0	0	0	0	0	0	0	0	1	0	0	0	0	0	0	0	0	0	0	0	0	0
9182428	2017-10-13	11:03:00	2	9	1	1	1		CHARCOAL				0	0	1	0		FEVER	100	60	177	99	38.8	16.8617	0	0	0	0	0	0	0	0	0	0	0	0	0	0	1	0	0	0	0	0	0	0	0	0	0
9182700	2017-10-18	16:24:00	2	6	1	1	1	0	GAS	1	0	0	0	0	1	0		COUGH/HOT/CRYING	156	89	120	95	37.2	15.1998	0	0	0	0	0	0	0	0	0	0	0	0	0	0	0	0	0	0	0	0	0	0	0	0	0
91821057	2017-10-25	08:08:00	2	11	1	0	1		CHARCOAL				0	1	1	0		HOT BODY	100	80	169	99	36.2	20.0877	0	0	0	0	0	0	0	0	0	0	0	0	0	0	0	0	0	0	0	0	0	0	0	0	0
91821066	2017-10-25	09:18:00	2	1	1	0	1		CHARCOAL				0	0	1	0		COUGH/HOT BODY			146	99	36.9		0	0	0	0	0	0	0	0	0	0	0	0	0	0	0	0	0	0	0	0	0	0	0	0	0
91821137	2017-10-27	04:38:00	2	3	1	0	1		CHARCOAL				0	0	1	0		COUGH/DIFFICULTY BREATHING	80	60	138	92	39.6		0	0	0	0	0	0	0	0	0	0	0	0	0	0	0	0	0	0	0	0	0	0	0	0	0
9182138	2017-10-05	17:55:00	2	11	1	1	1						0	0	1	0		DIARRHOEA/VOMITING	100	90	123	99	36.8	20.1562	0	0	0	0	0	0	0	0	0	0	0	0	0	0	0	0	0	0	0	0	0	0	0	0	0
240223	2017-04-11		2	3	1	0	1	1	FIREWOOD	0	0	0	0	0	1	0		COUGH/DIFFICULTY BREATHING			179	81	38.4	11.036	0	0	0	0	0	0	0	0	0	0	0	0	0	0	0	0	0	0	0	0	0	0	0	0	0
260302	2017-04-13		2	11	1	1	1	0	CHARCOAL+FIREWOOD	0	1	0	0	0	1	0		WEAKNESS			84	71	37.4	15.873	0	0	0	0	0	0	0	0	0	0	0	0	0	0	0	0	0	0	0	0	0	0	0	0	0
240117	2017-04-06		2	9	1	0	1	0	FIREWOOD	0	1	0	0	0	1	0		FEVER/CONVULSIONS			100	87	38	18.9349	0	0	0	0	0	0	0	0	0	0	0	0	0	0	0	0	0	0	0	0	0	0	0	0	0
260272	2017-04-12		2	6	1	1	1	0	FIREWOOD	0	0	0	0	1	1	0		FEVER			137	98	37.4	12.0937	0	0	0	0	0	0	0	0	0	0	0	0	0	0	0	0	0	0	0	0	0	0	0	0	0
260301	2017-04-14		2	7	1	0	1	0	CHARCOAL	0	1	0	0	1	1	0		FEVER			107	79	40.4	34.5679	0	0	0	0	0	0	0	0	0	0	0	0	0	0	0	0	0	0	0	0	0	0	0	0	0
260303	2017-04-13	21:41:00	2	8	1	0	1	0	CHARCOAL+GAS	1	1	0	0	1	1	0		DIARRHOEA			152	98	36.8	18.3673	0	0	0	0	0	0	0	0	0	0	0	0	0	0	0	0	0	0	0	0	0	0	0	0	0
260647	2017-04-28		2	9	1	1	1	0	CHARCOAL	0	0	0	0	0	1	0		DIARRHOEA/VOMITING			147	99	37.4	14.9219	0	0	0	0	0	0	0	0	0	0	0	0	0	0	0	0	0	0	0	0	0	0	0	0	0
9182111	2017-10-04	10:40:00	2	10	1	0	1		CHARCOAL+GAS				0	0	1	0		FEVER			144	95	36.8		0	0	0	0	0	0	0	0	0	0	0	0	0	0	0	0	0	0	0	0	0	0	0	0	0
9182458	2017-10-14	09:01:00	2	7	1	0	1		CHARCOAL				0	0	1	0		FEVER			124		35.6	19.8347	0	0	0	0	0	0	0	0	0	0	0	0	0	0	0	0	0	0	0	0	0	0	0	0	0
9182468	2017-10-14	12:47:00	2	9	1	0	1	0	CHARCOAL	1	0	1	0	0	1	0		DIARRHOEA	100	70	123	99	36.5	14.3363	0	0	0	0	0	0	0	0	0	0	0	0	0	0	0	0	0	0	0	0	0	0	0	0	0
240050	2017-04-01		2	1	1	0	1	0	CHARCOAL	0	0	0	0	0	1	0		DIFFICULTY BREATHING					35.2		0	0	0	0	0	0	0	0	0	0	0	0	0	0	0	0	0	0	0	0	0	0	0	0	0
240148	2017-04-03		2	0	1	1	1	0	CHARCOAL	1	0	0	0	0	1	0		DIFFICULTY BREATHING					38.6	13.1492	0	0	0	0	0	0	0	0	0	0	0	0	0	0	0	0	0	0	0	0	0	0	0	0	0
240224	2017-04-11		2	2	1	1	1	0	CHARCOAL	0	0	0	0	0	0	0		INCREASED ABDOMINAL VOLUME			151	92	36.8	15.2	0	0	0	0	0	0	0	0	0	0	0	0	0	0	0	0	0	0	0	0	0	0	0	0	0
240541	2017-04-30		2	1	1	0	1	0	CHARCOAL	0	0	0	0	0	0	0		ASPHYXIA (WEAK ASPIRATION)			160	99	37.3	13.9463	0	0	0	0	0	0	0	0	0	0	0	0	0	0	0	0	0	0	0	0	0	0	0	0	0
260077	2017-04-04	10:32:00	2	1	1	1	1	0	CHARCOAL	0	0	0	0	0	0	0		ABDOMINAL PAIN			90		36.3		0	0	0	0	0	0	0	0	0	0	0	0	0	0	0	0	0	0	0	0	0	0	0	0	0
260116	2017-04-05		2	0	1	1	1	0	CHARCOAL	0	0	0	0	0	0	0		CRYING/COUGH	100	80	145	95	36.3	14.9793	0	0	0	0	0	0	0	0	0	0	0	0	0	0	0	0	0	0	0	0	0	0	0	0	0
260286	2017-04-10	10:05:00	2	10	1	1	1	0	CHARCOAL	0	0	0	0	0	0	0		FEVER			98	98	37.7	16.1381	0	0	0	0	0	0	0	0	0	0	0	0	0	0	0	0	0	0	0	0	0	0	0	0	0
260394	2017-04-17	06:32:00	2	0	1	0	1	0	FIREWOOD	0	0	0	0	1	0	0		ABDOMINAL PAIN			138	96	36.2	15.963	0	0	0	0	0	0	0	0	0	0	0	0	0	0	0	0	0	0	0	0	0	0	0	0	0
9182188	2017-10-06	20:54:00	2	1	1	0	1	0	FIREWOOD	0	0	0	0	0	0	0		FEVER/REFUSING TO SUCK					39.9	72.431	0	0	0	0	0	0	0	0	0	0	0	0	0	0	0	0	0	0	0	0	0	0	0	0	0
9182202	2017-10-07	14:03:00	2	1	1	1	1		CHARCOAL				0	0	0	0		FEVER/VOMITING			125	88	36.6	18.595	0	0	0	0	0	0	0	0	0	0	0	0	0	0	0	0	0	0	0	0	0	0	0	0	0
9182749	2017-10-19	14:59:00	2	8	1	1	1	0	CHARCOAL	0	0	0	0	0	0	0		NO BREAST			150	90	37.3	12.2873	0	0	0	0	0	0	0	0	0	0	0	0	0	0	0	0	0	0	0	0	0	0	0	0	0
9182846	2017-10-21	15:24:00	2	2	1	1	1		CHARCOAL				0	0	0	0		FEVER			123	95	37.4	10.8507	0	0	0	0	0	0	0	0	0	0	0	0	0	0	0	0	0	0	0	0	0	0	0	0	0
9182860	2017-10-21	18:19:00	2	6	1	1	1		CHARCOAL				0	0	0	0		WEAKNESS			125	98	36.4	16.7075	0	0	0	0	0	0	0	0	0	0	0	0	0	0	0	0	0	0	0	0	0	0	0	0	0
260415	2017-04-19	11:00:00	2	8	1	1	1	0	CHARCOAL	0	0	0	0	0	0	0		LABIAL MASS	120	70	92	98	36.7	6.77686	0	0	0	0	0	0	0	0	0	0	0	0	0	0	0	0	0	0	0	0	0	0	0	0	0
260255	2017-04-12	09:00:00	2	8	1	0	1	0	FIREWOOD	1	0	0	0	0	0	0		DOES NOT HAVE CERVICAL CONTROL			138	96	37	23.4316	0	0	0	0	0	0	0	0	0	0	0	0	0	0	0	0	0	0	0	0	0	0	0	0	0
240119	2017-04-06	17:30:00	2	1	1	1	1	0	CHARCOAL	0	0	0	0	0	0	0		CRYING WHEN MOBILIZING LOWER LEFT LIMB			130		37.6	15.467	0	0	0	0	0	0	0	0	0	0	0	0	0	0	0	0	0	1	0	0	0	0	0	0	0
240307	2017-04-14	15:52:00	2	10	1	1	1	0	CHARCOAL	0	0	0	0	1	0	0		SUSPECTED INGESTION OF NAIL			130		36.4	29.0909	0	0	0	0	0	0	0	0	0	0	0	0	0	0	0	0	0	0	0	0	0	0	0	0	0
240315	2017-04-14	09:45:00	2	1	1	0	1	0	CHARCOAL+FIREWOOD	0	0	0	0	0	0	0		LEFT LEG PAIN			124		37.2	9.94513	0	0	0	0	0	0	0	0	0	0	0	0	0	0	0	0	0	0	0	0	0	0	0	0	0
240379	2017-04-18		2	3	1	0	1	0	FIREWOOD	0	0	0	0	0	0	0		FEVER			110	98	37.8	10.4123	0	0	0	0	0	0	0	0	0	0	0	0	0	1	0	0	0	0	0	0	0	0	0	0	0
260027	2017-04-02	17:10:00	2	1	1	1	1	0	CHARCOAL	1	0	0	0	1	0	0		LEFT SHOULDER PAIN			70	95	36		0	0	0	0	0	0	0	0	0	0	0	0	1	0	0	0	0	0	0	0	0	0	0	0	0
260042	2017-04-02	20:05:00	2	12	1	1	1	0	CHARCOAL	0	0	0	0	0	0	0		BROKEN ARM LEFT	100	80	124	98	36.7	13.8408	0	0	0	0	0	0	0	0	0	0	0	0	0	0	1	0	0	0	0	0	0	0	0	0	0
260158	2017-04-08	16:00:00	2	7	1	0	1	0	GAS+CHARCOAL	0	0	0	0	0	0	0		ABRASIONS POST TRAFFIC ACCIDENT	125	68	95	99	36.8	24.1284	0	0	0	0	0	0	0	0	0	0	0	0	0	0	0	0	0	0	0	0	0	0	0	0	0
260169	2017-04-08	11:40:00	2	4	1	1	1	0	CHARCOAL	0	0	0	0	0	0	0		FALL			166	94	36.6	12.0935	0	0	0	0	0	0	0	0	0	0	0	0	1	0	0	0	0	0	0	0	0	0	0	0	0
260194	2017-04-09	14:40:00	2	5	1	1	1	0	CHARCOAL	0	0	1	0	0	0	0		DROPPED IN MOTHER'S LAP			141	91	36.4	14.8633	0	0	0	0	0	0	0	0	0	0	0	1	0	0	0	0	0	0	0	0	0	0	0	0	0
260491	2017-04-18	12:30:00	2	6	1	1	1	0	CHARCOAL	0	0	0	0	0	0	0		BURN			94		36.2	17.4191	0	0	0	0	0	0	0	0	0	0	0	0	0	1	0	0	0	0	0	0	0	0	0	0	0
260719	2017-04-30	12:00:00	2	2	1	1	1	0	CHARCOAL	0	0	0	0	0	0	0		FALL	110	70	99	96	36.3	17.1468	0	0	0	0	0	0	0	0	0	0	0	0	0	0	0	0	1	0	0	0	0	0	0	0	0
918216	2017-10-01	10:45:00	2	9	1	1	1	0	FIREWOOD	0	1	0	0	1	0	0		LEFT THIGH TRAUMA	90	80			36.9		0	0	0	0	0	0	0	0	0	0	0	0	0	0	0	0	1	0	0	0	0	0	0	0	0
9182350	2017-10-11	09:15:00	2	1	1	1	1		CHARCOAL				0	0	0	0		UPPER ANTERIOR CHEST PAIN			153	98	36.6		0	0	0	0	0	0	0	0	0	0	0	0	1	0	0	0	0	0	0	0	0	0	0	0	0
9182533	2017-10-16	05:38:00	2	3	1	0	1		CHARCOAL				0	1	0	0		LEFT LEG PAIN	90	60	120		35	18.75	0	0	0	0	0	0	0	0	0	0	0	0	0	0	0	0	0	0	0	1	0	0	0	0	0
9182755	2017-10-19	17:13:00	2	1	1	1	1	0	CHARCOAL	1	0	0	0	1	0	0		RIGHT FOOT WOUND	111	80	118	99	37	11.6112	0	1	0	0	0	0	0	0	0	0	0	0	0	0	0	0	0	0	0	0	0	0	0	0	0
9182909	2017-10-22	16:00:00	2	21	1	0	1	0	CHARCOAL	0	1	0	0	0	0	0		FEVER			193	96	38.4	9.24556	0	0	0	0	0	0	0	0	0	0	0	0	0	0	0	0	1	0	0	0	0	0	0	0	0
91821015	2017-10-24	10:57:00	2	4	1	0	1		CHARCOAL				0	0	0	0		FALL/FEVER			100	99	37	2.13599	0	0	0	0	0	0	0	0	0	0	0	1	0	0	0	0	0	0	0	0	0	0	0	0	0
91821034	2017-10-24	19:30:00	2	11	1	0	1		CHARCOAL				0	1	0	0		SWOLLOWED MONEY	140	90	162	85	37.7	13.8667	0	0	0	0	0	0	0	0	0	0	1	0	0	0	0	0	0	0	0	0	0	0	0	0	0
91821124	2017-10-26	14:47:00	2	20	1	0	1		CHARCOAL				0	0	0	0		DIFFICULTY MOVING LEFT FOOT	178	111	158	96	37.3	10.5785	0	0	1	0	0	0	0	0	0	0	0	0	0	0	0	0	0	0	0	0	0	0	0	0	0
91821212	2017-10-28	10:22:00	2	4	1	1	1		CHARCOAL				0	0	0	0		FALL			104	76	36.1	15.3811	0	0	0	0	0	0	0	0	0	0	0	0	0	0	0	0	0	0	0	0	0	0	0	0	0
91821223	2017-10-28	15:00:00	2	11	1	0	1		CHARCOAL				0	0	0	0		SHOULDER TRAUMA	90	60	176	99	36.6	20.3287	0	0	0	0	0	0	0	0	0	0	0	0	0	0	0	0	0	0	0	1	0	0	0	0	0
240503	2017-04-25	11:00:00	2	13	1	0	1	0	CHARCOAL	0	0	0	0	0	0	0		STOMACH SWELLING			144	87	37.2		0	0	0	0	0	0	0	0	0	0	0	0	0	0	0	0	0	0	0	0	0	0	0	0	0
9182991	2017-10-23	23:20:00	2	2	1	0	1		CHARCOAL				0	0	0	0		DIFFICULTY BREATHING	90	65	166	99	36.3		0	0	0	0	0	0	0	0	0	0	0	0	0	0	0	0	0	0	0	0	0	0	0	0	0
260590	2017-04-22	16:46:00	2	2	1	0	1	0	CHARCOAL	0	0	0	0	0	0	0		DOG BITES	120	60	88	98	36.3	14.9912	0	0	0	0	0	0	0	1	0	0	0	0	0	0	0	0	0	0	0	0	0	0	0	0	0
240228	2017-04-11		2	11	1	0	1	1	FIREWOOD	0	0	0	0	0	0	0		WEIGHT LESS			79	60	39.6	14.3637	0	0	0	0	0	0	0	0	0	0	0	0	0	0	0	0	0	0	0	0	0	0	0	0	0
9182406	2017-10-12	20:57:00	2	0	1	0	1	0	FIREWOOD	0	0	0	0	0	0	0		WEAK ASPIRATION			86	81	37.3	3.0839	0	0	0	0	0	0	0	0	0	0	0	0	0	0	0	0	0	0	0	0	0	0	0	0	0
9182558	2017-10-16	11:32:00	2	5	1	0	1		FIREWOOD				0	0	0	0		DIARRHOEA WITH MUCUS					39.3		0	0	0	0	0	0	0	0	0	0	0	0	0	0	0	0	0	0	0	0	0	0	0	0	0
9182974	2017-10-23	15:45:00	2	11	1	0	1		FIREWOOD				0	1	0	0		ANASARCA/FEVER	100	60	158	96	39.4	15.9435	0	0	0	0	0	0	0	0	0	0	0	0	0	0	0	0	0	0	0	0	0	0	0	0	0
240120	2017-04-06	16:30:00	2	1	1	1	1	0	FIREWOOD	0	0	0	0	0	0	0		PRURITUS			140		37.7	21.542	0	0	0	0	0	0	0	0	0	0	0	0	0	0	0	0	0	0	0	0	0	0	0	0	0
240136	2017-04-03	09:30:00	2	4	1	1	1	0	CHARCOAL	0	0	0	0	1	0	0		BUBBLES (HEAT RASH??)			169	81	36.9	6.17284	0	0	0	0	0	0	0	0	0	0	0	0	0	0	0	0	0	0	0	0	0	0	0	0	0
240183	2017-04-07	18:30:00	2	1	1	0	1	0	CHARCOAL	0	0	0	0	0	0	0		SKIN LESIONS					37.2		0	0	0	0	0	0	0	0	0	0	0	0	0	0	0	0	0	0	0	0	0	0	0	0	0
240381	2017-04-18	17:03:00	2	8	1	0	1	0	GAS	0	0	0	0	0	0	0		PRURITUS			100	98	36.6	13.8776	0	0	0	0	0	0	0	0	0	0	0	0	0	0	0	0	0	0	0	0	0	0	0	0	0
260197	2017-04-09	13:40:00	2	8	1	0	1	0	CHARCOAL	1	1	0	0	0	0	0		LESIONS ON BACK AND UMBILICAL STUMP			144	95	37	13.6834	0	0	0	0	0	0	0	0	0	0	0	0	0	0	0	0	0	0	0	0	0	0	0	0	0
9182236	2017-10-08	10:41:00	2	1	1	1	1	1	CHARCOAL	1	1	0	0	0	0	0		SKIN RASH			126	83	38.1	10.2881	0	0	0	0	0	0	0	0	0	0	0	0	0	0	0	0	0	0	0	0	0	0	0	0	0
9182620	2017-10-17	11:14:00	2	5	1	1	1		CHARCOAL				0	0	0	0		BUBBLES (HEAT RASH??)/PRURITUS					36	29.6156	0	0	0	0	0	0	0	0	0	0	0	0	0	0	0	0	0	0	0	0	0	0	0	0	0
9182622	2017-10-17	11:18:00	2	2	1	1	1		CHARCOAL				0	0	0	0		SKIN BLEMISH					36.4	12.7551	0	0	0	0	0	0	0	0	0	0	0	0	0	0	0	0	0	0	0	0	0	0	0	0	0
91821128	2017-10-26	16:41:00	2	8	1	0	1		CHARCOAL+GAS				0	0	0	0		BUBBLES (HEAT RASH??)	122	90	129	94	36.7	15.3822	0	0	0	0	0	0	0	0	0	0	0	0	0	0	0	0	0	0	0	0	0	0	0	0	0
91821228	2017-10-28	17:23:00	2	1	1	1	1	1	CHARCOAL	1	0	0	0	0	0	0		SCALP SWELLING			170	94	37.7	13.3769	0	0	0	0	0	0	0	0	0	0	0	0	0	0	0	0	0	0	0	0	0	0	0	0	0
240037	2017-04-01		2	6	1	1	1	0	CHARCOAL	0	0	0	0	0	0	0		FEVER/RHINORRHEA			78	96	34.5		0	0	0	0	0	0	0	0	0	0	0	0	0	0	0	0	0	0	0	0	0	0	0	0	0
240047	2017-04-01		2	3	1	0	1	0	GAS	0	0	0	0	0	0	0		FEVER/RHINORRHEA			116	89	35.6		0	0	0	0	0	0	0	0	0	0	0	0	0	0	0	0	0	0	0	0	0	0	0	0	0
240125	2017-04-06	12:00:00	2	12	1	1	1	0	CHARCOAL	0	0	0	0	1	0	0		FEVER			127	97	38	22.7059	0	0	0	0	0	0	0	0	0	0	0	0	0	0	0	0	0	0	0	0	0	0	0	0	0
240182	2017-04-07	18:10:00	2	2	1	0	1	0	CHARCOAL	0	0	0	0	0	0	0		FEVER					37.2		0	0	0	0	0	0	0	0	0	0	0	0	0	0	0	0	0	0	0	0	0	0	0	0	0
240265	2017-04-11	17:45:00	2	9	1	0	1	0	CHARCOAL	0	0	0	0	0	0	0		FEVER/DIFFICULTY BREATHING	100	80	100	86	40.3	10	0	0	0	0	0	0	0	0	0	0	0	0	0	0	0	0	0	0	0	0	0	0	0	0	0
240270	2017-04-10		2	5	1	1	1	0	CHARCOAL	0	0	0	0	1	0	0		DIFFICULTY BREATHING/COUGH			99	96	38.7	17.6367	0	0	0	0	0	0	0	0	0	0	0	0	0	0	0	0	0	0	0	0	0	0	0	0	0
240340	2017-04-15	17:45:00	2	7	1	0	1	0	CHARCOAL	0	0	0	0	0	0	0		COUGH					37.3	13.8889	0	0	0	0	0	0	0	0	0	0	0	0	0	0	0	0	0	0	0	0	0	0	0	0	0
240341	2017-04-15	19:15:00	2	1	1	1	1	0	CHARCOAL	0	0	0	0	0	0	0		COUGH/FEVER					38.3	15.2	0	0	0	0	0	0	0	0	0	0	0	0	0	0	0	0	0	0	0	0	0	0	0	0	0
240342	2017-04-15	13:00:00	2	2	1	0	1	0	CHARCOAL	0	0	0	0	0	0	0		DYSPNOEA					37.1	12.7551	0	0	0	0	0	0	0	0	0	0	0	0	0	0	0	0	0	0	0	0	0	0	0	0	0
240394	2017-04-17	18:30:00	2	15	1	0	1	0	FIREWOOD	0	0	0	0	0	0	0		DYSPNOEA			104	89	36.7	12.4	0	0	0	0	0	0	0	0	0	0	0	0	0	0	0	0	0	0	0	0	0	0	0	0	0
240397	2017-04-18		2	4	1	0	1	0	CHARCOAL	0	0	0	0	0	0	0		DYSPNOEA	60	40	110		36	17.2361	0	0	0	0	0	0	0	0	0	0	0	0	0	0	0	0	0	0	0	0	0	0	0	0	0
240418	2017-04-20	19:19:00	2	8	1	0	1	0	CHARCOAL	1	1	1	0	1	0	0		FEVER/COUGH	120	50	114	96	39.8	15.3061	0	0	0	0	0	0	0	0	0	0	0	0	0	0	0	0	0	0	0	0	0	0	0	0	0
240437	2017-04-22		2	10	1	0	1	0	CHARCOAL	0	0	0	0	0	0	0		FEVER/DYSPNEA	50	20	170	85	35.2	19.0542	0	0	0	0	0	0	0	0	0	0	0	0	0	0	0	0	0	0	0	0	0	0	0	0	0
240441	2017-04-16	00:35:00	2	8	1	1	1	0	CHARCOAL	0	1	0	0	0	0	0		COUGH/HOT BODY/DIFFICULTY BREATHING	130	80	132	95	37	17.8223	0	0	0	0	0	0	0	0	0	0	0	0	0	0	0	0	0	0	0	0	0	0	0	0	0
240442	2017-04-16		2	2	1	0	1	0	CHARCOAL	0	0	0	0	0	0	0		HOT BODY/COUGH/DIFFICULTY BREATHING	120	70	124	96	38.3	14.3495	0	0	0	0	0	0	0	0	0	0	0	0	0	0	0	0	0	0	0	0	0	0	0	0	0
240496	2017-04-21		2	20	1	0	1	0	CHARCOAL	0	0	0	0	0	0	0		DIFFICULTY BREATHING			120	89	35	12.4	1	0	0	0	0	0	0	0	0	0	0	0	0	0	0	0	0	0	0	0	0	0	0	0	0
260067	2017-04-04	09:38:00	2	1	1	1	1	0	CHARCOAL	0	0	0	0	0	0	0							35.3		0	0	0	0	0	0	0	0	0	0	0	0	0	0	0	0	0	0	0	0	0	0	0	0	0
260076	2017-04-04	13:50:00	2	11	1	0	1	0	CHARCOAL	0	0	0	0	1	0	0		COUGH/FEVER			158	95	36.9	22.4852	0	0	0	0	0	0	0	0	0	0	0	0	0	0	0	0	0	0	0	0	0	0	0	0	0
260079	2017-04-04	18:58:00	2	4	1	0	1	0	CHARCOAL	1	0	0	0	0	0	0		COUGH/FEVER			185	97	36.5		0	0	0	0	0	0	0	0	0	0	0	0	0	0	0	0	0	0	0	0	0	0	0	0	0
260099	2017-04-06		2	5	1	0	1	0	FIREWOOD	0	1	0	0	1	0	0		DIFFICULTY BREATHING/COUGH			140		37.1	31.25	0	0	0	0	0	0	0	0	0	0	0	0	0	0	0	0	0	0	0	0	0	0	0	0	0
260117	2017-04-07		2	3	1	1	1	0	CHARCOAL+FIREWOOD	0	0	0	0	0	0	0		FREQUENT CRYING (IRRITABLE)	100	80	125	95	38.3	19.8903	0	0	0	0	0	0	0	0	0	0	0	0	0	0	0	0	0	0	0	0	0	0	0	0	0
260118	2017-04-07	02:50:00	2	12	1	0	1	0	CHARCOAL	1	0	0	0	1	0	0		COUGH			126	97	36.3	17.5771	0	0	0	0	0	0	0	0	0	0	0	0	0	0	0	0	0	0	0	0	0	0	0	0	0
260120	2017-04-07	05:14:00	2	11	1	0	1	0	CHARCOAL	0	0	0	0	0	0	0		FEVER	98	74	124	97	37.6	16.3265	0	0	0	0	0	0	0	0	0	0	0	0	0	0	0	0	0	0	0	0	0	0	0	0	0
260135	2017-04-06	12:02:00	2	3	1	0	1	0	CHARCOAL+ELECTRIC OVEN	0	0	0	1	1	0	0		SORE THROAT	122	76	80	97	38.1	20.3114	0	0	0	0	0	0	0	0	0	0	0	0	0	0	0	0	0	0	0	0	0	0	0	0	0
260193	2017-04-03		2	4	1	1	1	0	CHARCOAL	1	0	0	1	1	0	0		COUGH/HOT BODY			142	94	36.6	19.2	0	0	0	0	0	0	0	0	0	0	0	0	0	0	0	0	0	0	0	0	0	0	0	0	0
260227	2017-04-07	21:44:00	2	5	1	0	1	0	CHARCOAL	1	0	0	0	0	0	0		GASTROENTERITIS			118	72	38.7	22.2949	0	0	0	0	0	0	0	0	0	0	0	0	0	0	0	0	0	0	0	0	0	0	0	0	0
260282	2017-04-10	13:30:00	2	7	1	0	1	0	CHARCOAL	0	0	0	0	0	0	0		COUGH			116	94	36.6	16.3496	0	0	0	0	0	0	0	0	0	0	0	0	0	0	0	0	0	0	0	0	0	0	0	0	0
260284	2017-04-10	11:43:00	2	5	1	1	1	0	CHARCOAL	0	0	0	0	0	0	0		COUGH			117		36.6	10.0438	0	0	0	0	0	0	0	0	0	0	0	0	0	0	0	0	0	0	0	0	0	0	0	0	0
260485	2017-04-18		2	2	1	1	1	0	FIREWOOD	0	0	0	0	0	0	0		FEVER/COUGH			140		38.5	17.6855	0	0	0	0	0	0	0	0	0	0	0	0	0	0	0	0	0	0	0	0	0	0	0	0	0
260487	2017-04-18	15:55:00	2	6	1	1	1	0	CHARCOAL	0	0	0	0	0	0	0		COUGH/DIFFICULTY BREATHING			87		37.4	17.8213	0	0	0	0	0	0	0	0	0	0	0	0	0	0	0	0	0	0	0	0	0	0	0	0	0
260539	2017-04-24	09:54:00	2	6	1	1	1	0	CHARCOAL	0	0	0	0	0	0	0		FEVER			100		36.2	32.4	0	0	0	0	0	0	0	0	0	0	0	0	0	0	0	0	0	0	0	0	0	0	0	0	0
260595	2017-04-27	07:35:00	2	11	1	1	1	0	CHARCOAL	0	0	0	0	0	0	0		FEVER/COUGH	102	51	102	89	36.7	13.3849	0	0	0	0	0	0	0	0	0	0	0	0	0	0	0	0	0	0	0	0	0	0	0	0	0
260611	2017-04-22	10:23:00	2	13	1	1	1	0	CHARCOAL	0	0	0	0	0	0	0		COUGH/FEVER	130	60	138	90	37.8	10.68	0	0	0	0	0	0	0	0	0	0	0	0	0	0	0	0	0	0	0	0	0	0	0	0	0
260612	2017-04-22	09:50:00	2	0	1	1	1	0	CHARCOAL	0	0	0	0	0	0	0		DIARRHOEA/VOMITING	124	80	121	99	36	11.2233	0	0	0	0	0	0	0	0	0	0	0	0	0	0	0	0	0	0	0	0	0	0	0	0	0
918218	2017-10-01	12:17:00	2	7	1	0	1		CHARCOAL				0	0	0	0		DIFFICULTY BREATHING	96	82			37.8	19.7137	0	0	0	0	0	0	0	0	0	0	0	0	0	0	0	0	0	0	0	0	0	0	0	0	0
918224	2017-10-01	21:09:00	2	12	1	1	1		CHARCOAL+GAS				0	0	0	0		FEVER/COUGH	100	60	88		37.2	9.65712	0	0	0	0	0	0	0	0	0	0	0	0	0	0	0	0	0	0	0	0	0	0	0	0	0
918279	2017-10-03	20:33:00	2	8	1	0	1	0	CHARCOAL	1	0	0	0	1	0	0		FEVER/RHINORRHEA	70	40	147	96	39.1	16.7657	0	0	0	0	0	0	0	0	0	0	0	0	0	0	0	0	0	0	0	0	0	0	0	0	0
9182155	2017-10-05	23:10:00	2	8	1	0	1	0	CHARCOAL	0	0	1	0	0	0	0		FEVER	120	80	192	96	38.9	18.6469	0	0	0	0	0	0	0	0	0	0	0	0	0	0	0	0	0	0	0	0	0	0	0	0	0
9182180	2017-10-06	09:41:00	2	1	1	0	1		CHARCOAL				0	0	0	0		FEVER	100	90	154	87	38.1	9.99616	0	0	0	0	0	0	0	0	0	0	0	0	0	0	0	0	0	0	0	0	0	0	0	0	0
9182186	2017-10-06	13:15:00	2	3	1	1	1	0	CHARCOAL	0	0	0	0	0	0	0		DIFFICULTY BREATHING			167	98	38.1	11.9048	0	0	0	0	0	0	0	0	0	0	0	0	0	0	0	0	0	0	0	0	0	0	0	0	0
9182201	2017-10-07	16:20:00	2	2	1	1	1		CHARCOAL				0	0	0	0		CONSTIPATION/FEVER			130	95	37	13.5808	0	0	0	0	0	0	0	0	0	0	0	0	0	0	0	0	0	0	0	0	0	0	0	0	0
9182221	2017-10-07	22:35:00	2	5	1	1	1		CHARCOAL				0	0	0	0		FEVER	100	60	122	89	36.4	16.3314	0	0	0	0	0	0	0	0	0	0	0	0	0	0	0	0	0	0	0	0	0	0	0	0	0
9182240	2017-10-08	11:24:00	2	6	1	1	2	1	CHARCOAL+ELECTRICITY	0	1	0	0	0	0	0		COUGH			166	88	36.9	6.83604	0	0	0	0	0	0	0	0	0	0	0	0	0	0	0	0	0	0	0	0	0	0	0	0	0
9182291	2017-10-09	17:13:00	2	6	1	1	1		CHARCOAL				0	0	0	0		COUGH/FEVER			167	93	38.4	21.4996	0	0	0	0	0	0	0	0	0	0	0	0	0	0	0	0	0	0	0	0	0	0	0	0	0
9182385	2017-10-12	09:05:00	2	10	1	0	1		CHARCOAL				0	0	0	0		COUGH			128	96	36.4	127.219	0	0	0	0	0	0	0	0	0	0	0	0	0	0	0	0	0	0	0	0	0	0	0	0	0
9182485	2017-10-15	21:00:00	2	11	1	1	1		CHARCOAL				0	1	0	0		FEVER	110	70	131	98	38.2	18.3824	0	0	0	0	0	0	0	0	0	0	0	0	0	0	0	0	0	0	0	0	0	0	0	0	0
9182488	2017-10-15	08:29:00	2	6	1	0	1	0	CHARCOAL	1	0	0	0	1	0	0		FEVER	100	80	120		36.6	17.0764	0	0	0	0	0	0	0	0	0	0	0	0	0	0	0	0	0	0	0	0	0	0	0	0	0
9182693	2017-10-18	13:35:00	2	2	1	0	1	0	CHARCOAL	1	0	0	0	0	0	0		TREMORS	160	90	196	96	36.9	8.57339	0	0	0	0	0	0	0	0	0	0	0	0	0	0	0	0	0	0	0	0	0	0	0	0	0
9182711	2017-10-18	23:40:00	2	1	1	0	1		CHARCOAL				0	0	0	0		DYSPNEA	95	40	110	98	37.1	9.73183	0	0	0	0	0	0	0	0	0	0	0	0	0	0	0	0	0	0	0	0	0	0	0	0	0
9182730	2017-10-19	08:54:00	2	3	1	0	1	0	CHARCOAL	1	1	0	0	1	0	0		COUGH			143	95	36.4	23.0681	0	0	0	0	0	0	0	0	0	0	0	0	0	0	0	0	0	0	0	0	0	0	0	0	0
9182741	2017-10-19	11:26:00	2	10	1	1	1	0	CHARCOAL	1	0	0	0	1	0	0		FEVER	110	100	108	90	37.2	15.6956	0	0	0	0	0	0	0	0	0	0	0	0	0	0	0	0	0	0	0	0	0	0	0	0	0
9182794	2017-10-20	16:20:00	2	8	1	1	1		CHARCOAL				0	1	0	0		HOT BODY/COUGH/DIFFICULTY BREATHING	90	75	148	95	37.7	16.0698	0	0	0	0	0	0	0	0	0	0	0	0	0	0	0	0	0	0	0	0	0	0	0	0	0
9182807	2017-10-20	22:34:00	2	1	1	1	1		CHARCOAL				0	0	0	0		FEVER/DYSPNEA	110	70	108	71	37.4	16.118	0	0	0	0	0	0	0	0	0	0	0	0	0	0	0	0	0	0	0	0	0	0	0	0	0
9182816	2017-10-21	08:18:00	2	11	1	0	1		CHARCOAL+GAS				0	0	0	0		FEVER	100	80	100	89	39.1	17.3611	0	0	0	0	0	0	0	0	0	0	0	0	0	0	0	0	0	0	0	0	0	0	0	0	0
9182825	2017-10-21	10:09:00	2	1	1	1	1		CHARCOAL				0	0	0	0		FEVER/COUGH	100	70	123	98	36.6	15.3397	1	0	0	0	0	0	0	0	0	0	0	0	0	0	0	0	0	0	0	0	0	0	0	0	0
9182834	2017-10-21	12:19:00	2	8	1	0	1		CHARCOAL				0	0	0	0		CRYING AT NIGHT			123	95	37	10.8646	1	0	0	0	0	0	0	0	0	0	0	0	0	0	0	0	0	0	0	0	0	0	0	0	0
9182938	2017-10-23	06:37:00	2	2	1	1	1		CHARCOAL				0	1	0	0		FEVER/COUGH			100	80	36.4	21.5451	0	0	0	0	0	0	0	0	0	0	0	0	0	0	0	0	0	0	0	0	0	0	0	0	0
9182970	2017-10-23	14:04:00	2	8	1	0	1		FIREWOOD				0	0	0	0		DIFFICULTY BREATHING	100	60	63	61	39	10.7897	0	0	0	0	0	0	0	0	0	0	0	0	0	0	0	0	0	0	0	0	0	0	0	0	0
9182981	2017-10-23	18:19:00	2	5	1	0	1		CHARCOAL+FIREWOOD				0	0	0	0		DYSPNOEA/COUGH/FEVER	120	70	78	82	38.6	17.9882	0	0	0	0	0	0	0	0	0	0	0	0	0	0	0	0	0	0	0	0	0	0	0	0	0
240180	2017-04-07		2	1	1	0	1	0	CHARCOAL	0	1	0	0	0	0	0		CHEST SWELLING					38.9		0	0	0	0	0	0	0	0	0	0	0	0	0	0	0	0	0	0	0	0	0	0	0	0	0
918280	2017-10-10	21:16:00	2	6	1	1	1	1	CHARCOAL	0	0	0	0	1	0	0		MOTOR DIFFICULTY	90	60	44	87	36.9	10.203	0	0	0	0	0	0	0	0	0	0	0	0	0	0	0	0	0	0	0	0	0	0	0	0	0
9182538	2017-10-16	07:24:00	2	4	1	1	1		CHARCOAL				0	0	0	0		UNABLE TO HOLD HEAD UP					35.6		0	0	0	0	0	0	0	0	0	0	0	0	0	0	0	0	0	0	0	0	0	0	0	0	0
91821119	2017-10-26	12:52:00	2	5	1	0	1		CHARCOAL				0	0	0	0		INCREASED HEAD VOLUME	150	80	112	86	37.6	17.6367	0	0	0	0	0	0	0	0	0	0	0	0	0	0	0	0	0	0	0	0	0	0	0	0	0
91821238	2017-10-29	05:08:00	2	7	1	0	1		CHARCOAL				0	0	0	0		INCREASED HEAD VOLUME			95	49	39.6	17.3611	0	0	0	0	0	0	0	0	0	0	0	0	0	0	0	0	0	0	0	0	0	0	0	0	0
240443	2017-04-18		2	17	1	0	1	0	CHARCOAL	0	0	0	0	0	0	0		FOOT DEFORMITY							0	0	0	0	0	0	0	0	0	0	0	0	0	0	0	0	0	0	0	0	0	0	0	0	0
9182310	2017-10-10	09:38:00	2	1	1	0	1		FIREWOOD				0	0	0	0		FOOT DEFECT			196	99	36.4	15.9439	0	1	0	0	0	0	0	0	0	0	0	0	0	0	0	0	0	0	0	0	0	0	0	0	1
91821077	2017-10-25	12:05:00	2	2	1	0	1		CHARCOAL				0	0	0	0		DIFFICULTY PUTTING FOOT ON THE GROUND	99	70	144	92	36.4		0	0	0	0	0	0	0	0	0	0	0	0	0	0	0	0	0	0	0	0	0	0	0	0	0
260271	2017-04-12	17:20:00	2	8	1	1	1	0	CHARCOAL	0	0	0	0	0	0	0		VAGINAL IMPERFECTION			122	86	36.7	19.5312	0	0	0	0	0	0	0	0	0	0	0	0	0	0	0	0	0	0	0	0	0	0	0	0	0
260324	2017-04-11	19:43:00	2	1	1	1	1	0	CHARCOAL	0	0	0	0	0	0	0		FEVER/BREAST INFLAMMATION			163	94	37.6	12.303	0	0	0	0	0	0	0	0	0	0	0	0	0	0	0	0	0	0	0	0	0	0	0	0	0
9182495	2017-10-15	11:06:00	2	0	1	1	1	0	CHARCOAL	0	1	0	0	0	0	0		DIFFICULTY BREATHING			130		37.2	18.7654	0	0	0	0	0	0	0	0	0	0	0	0	0	0	0	0	0	0	0	0	0	0	0	0	0
260351	2017-04-15	14:15:00	2	8	1	1	1	0	CHARCOAL	0	0	0	0	0	0	0		SECRETION FROM EYES	130	80	123	96	35.9	18.2735	0	0	0	0	0	0	0	0	0	0	0	0	0	0	0	0	0	0	0	0	0	0	0	0	0
260378	2017-04-16	16:40:00	2	5	1	1	1	0	CHARCOAL	0	0	0	0	0	0	0		OUTFLOW OF SECRETION THROUGH EYES/COUGH			100	98	36.7	17.7515	0	0	0	0	0	0	0	0	0	0	0	0	0	0	0	0	0	0	0	0	0	0	0	0	0
260537	2017-04-24	10:00:00	2	1	1	1	1	0	CHARCOAL	0	0	0	0	0	0	0		SECRETION FROM EYES			100	98	36.7	15.4959	0	0	0	0	0	0	0	0	0	0	0	0	0	0	0	0	0	0	0	0	0	0	0	0	0
260538	2017-04-24	09:20:00	2	3	1	0	1	0	CHARCOAL	0	0	0	0	0	0	0		BLINDNESS			100	31	37.2	26.9127	0	0	0	0	0	0	0	0	0	0	0	0	0	0	0	0	0	0	0	0	0	0	0	0	0
9182822	2017-10-21	09:09:00	2	14	1	0	1		CHARCOAL				0	0	0	0		EYE RHEUM	100	80	125	98	36.3	12.8	1	0	0	0	0	0	0	0	0	0	0	0	0	0	0	0	0	0	0	0	0	0	0	0	0
240135	2017-04-05	03:29:00	2	6	1	0	1	0	CHARCOAL	0	0	0	0	0	0	0		INCONSOLABLE CRYING			135	98	37	31.1419	0	0	0	0	0	0	0	0	0	0	0	0	0	0	0	0	0	0	0	0	0	0	0	0	0
9182306	2017-10-10	08:06:00	2	10	1	1	1		CHARCOAL				0	0	0	0		DEAFNESS			86	94	36.4	21.004	0	0	0	0	0	0	0	0	0	0	0	0	0	0	0	0	0	0	0	0	0	0	0	0	0
9182486	2017-10-15	06:11:00	2	3	1	0	1	0	CHARCOAL	1	0	0	0	0	0	0		FEVER					35.8	19.1327	0	0	0	0	0	0	0	0	0	0	0	0	0	0	0	0	0	0	0	0	0	0	0	0	0
91821213	2017-10-28	11:48:00	2	1	1	1	1	0	CHARCOAL	0	1	0	0	0	0	0		GREEN DIARRHOEA			125	94	36.4	17.5383	0	0	0	0	0	0	0	0	0	0	0	0	0	0	0	0	0	0	0	0	0	0	0	0	0
240386	2017-04-17	10:59:00	2	10	1	1	1	0	GAS IN KITCHEN	0	0	0	0	0	0	0		DIARRHOEA			106	87	36.3	11.8983	0	0	0	0	0	0	0	0	0	0	0	0	0	0	0	0	0	0	0	0	0	0	0	0	0
260283	2017-04-10	12:15:00	2	1	1	1	1	0	CHARCOAL	0	0	0	0	0	0	0		GINGIVAL TUMOR			136		37	18.9292	0	0	0	0	0	0	0	0	0	0	0	0	0	0	0	0	0	0	0	0	0	0	0	0	0
260357	2017-04-15	09:15:00	2	6	1	0	1	0	CHARCOAL	0	0	0	0	0	0	0		JAW PAIN	90	60	139	95	36	14.4175	0	0	0	0	0	0	0	0	0	0	0	0	0	0	0	0	0	0	0	0	0	0	0	0	0
260594	2017-04-27	20:53:00	2	9	1	0	1	0	CHARCOAL	0	0	0	0	0	0	0		DIARRHOEA	116	69	102	98	37.6	15.5937	0	0	0	0	0	0	0	0	0	0	0	0	0	0	0	0	0	0	0	0	0	0	0	0	0
260635	2017-04-27		2	3	1	0	1	0	FIREWOOD	0	0	0	0	0	0	0		GENITAL SWELLING	80	60	140	97	36.6	16.0199	0	0	0	0	0	0	0	0	0	0	0	0	0	0	0	0	0	0	0	0	0	0	0	0	0
9182376	2017-10-11	21:55:00	2	10	1	0	1		CHARCOAL				0	0	0	0		DIARRHOEA/FEVER	90	40	177	97	38.6	18.8455	0	0	0	0	0	0	0	0	0	0	0	0	0	0	0	0	0	0	0	0	0	0	0	0	0
9182426	2017-10-13	10:30:00	2	11	1	0	1		CHARCOAL				0	1	0	0		FEVER/DIARRHOEA	100	60	156	97	36.8	10.731	0	0	0	0	0	0	0	0	0	0	0	0	0	0	0	0	0	0	0	0	0	0	0	0	0
9182635	2017-10-17	16:36:00	2	1	1	0	1	0	CHARCOAL	0	0	0	0	0	0	0		FEVER/DIARRHOEA			110		37.7	19.2901	0	0	0	0	0	0	0	0	0	0	0	0	0	0	0	0	0	0	0	0	0	0	0	0	0
91821112	2017-10-26	10:23:00	2	1	1	1	1		CHARCOAL				0	0	0	0		DIARRHOEA MORE THAN 5 TIMES	160	120	166	99	37	12.3115	0	0	0	0	0	0	0	0	0	0	0	0	0	0	0	0	0	0	0	0	0	0	0	0	0
91821126	2017-10-26	15:38:00	2	6	1	0	1		GAS				0	0	0	0		DIARRHOEA	160	92	128	82	34.9	18.3899	0	0	0	0	0	0	0	0	0	0	0	0	0	0	0	0	0	0	0	0	0	0	0	0	0
240438	2017-04-22		2	10	1	1	1	0	FIREWOOD	0	0	0	0	1	0	0		FEVER/GENERALIZED OEDEMA	70	30	161	99	36.6	15.1172	0	0	0	0	0	0	0	0	0	0	0	0	0	0	0	0	0	0	0	0	0	0	0	0	0
9182311	2017-10-10	07:28:00	2	11	1	1	1		CHARCOAL				0	1	0	0		FEVER ASTHENIAS	110	90	103	85	39.1	17.3611	0	0	0	0	0	0	0	0	0	0	0	0	0	0	0	0	0	0	0	0	0	0	0	0	0
91821030	2017-10-24	15:51:00	2	4	1	0	1		CHARCOAL				0	0	0	0		FEVER/COUGH			177	92	32.7	14.2012	0	0	0	0	0	0	0	0	0	0	0	0	0	0	0	0	0	0	0	0	0	0	0	0	0
91821058	2017-10-25	08:10:00	2	8	1	1	1		CHARCOAL				0	1	0	0		HOT BODY/WEAKNESS			188	99	38.3		0	0	0	0	0	0	0	0	0	0	0	0	0	0	0	0	0	0	0	0	0	0	0	0	0
240141	2017-04-03	11:30:00	2	1	1	1	1	0	CHARCOAL	0	0	0	0	0	0	0		ANKYLOGLOSSIA			196	96	36.7	8.33333	0	0	0	0	0	0	0	0	0	0	0	0	0	0	0	0	0	0	0	0	0	0	0	0	0
240395	2017-04-19	08:00:00	2	1	1	0	1	0	CHARCOAL	0	0	0	0	0	0	0		ANKYLOGLOSSIA			110	98	37.3	16.0199	0	0	0	0	0	0	0	0	0	0	0	0	0	0	0	0	0	0	0	0	0	0	0	0	0
240431	2017-04-21		2	15	1	0	1	0	CHARCOAL	0	0	0	0	0	0	0		BLADDER INFLAMMATION			146	80	37	10.4123	0	0	0	0	0	0	0	0	0	0	0	0	0	0	0	0	0	0	0	0	0	0	0	0	0
260115	2017-04-05		2	5	1	1	1	1	FIREWOOD	1	0	0	0	1	0	0		FEVER/DYSPNOEA/COUGH	100	80	158	95	38.8	14.6133	0	0	0	0	0	0	0	0	0	0	0	0	0	0	0	0	0	0	0	0	0	0	0	0	0
260432	2017-04-19		2	1	1	1	1	0	FIREWOOD	0	0	1	0	0	0	0		UMBILICAL TUMOR			138	99	35	9.98264	0	0	0	0	0	0	0	0	0	0	0	0	0	0	0	0	0	0	0	0	0	0	0	0	0
918282	2017-10-03	21:27:00	2	12	1	0	1	0		0	0	0	1	1	0	0		DIFFICULTY BREATHING			125	71	37.3	18.6709	0	0	0	0	0	0	0	0	0	0	0	0	0	0	0	0	0	0	0	0	0	0	0	0	0
9182229	2017-10-08	06:48:00	2	7	1	0	1		CHARCOAL				0	1	0	0		NOT SPEAKING	90	60	115	99	34.3	17.51	0	0	0	0	0	0	0	0	0	0	0	0	0	0	0	0	0	0	0	0	0	0	0	0	0
9182967	2017-10-23	13:29:00	2	6	1	1	1		CHARCOAL+FIREWOOD				0	0	0	0		HEAD SWELLING	90	50	88	67	37.1	10.0997	0	0	0	0	0	0	0	0	0	0	0	0	0	0	0	0	0	0	0	0	0	0	0	0	0
240043	2017-04-01		2	9	1	1	1	0		0	0	0	0	1	0	0		FEVER/RHINORRHEA			169	98	36.9	15.3329	0	0	0	0	0	0	0	0	0	0	0	0	0	0	0	0	0	0	0	0	0	0	0	0	0
240049	2017-04-01		2	7	1	0	1	0	CHARCOAL	0	0	0	0	1	0	0		FEVER			112	60	36.5		0	0	0	0	0	0	0	0	0	0	0	0	0	0	0	0	0	0	0	0	0	0	0	0	0
240051	2017-04-01		2	8	1	0	1	0	CHARCOAL	0	0	0	0	1	0	0		FEVER/FOAM IN MOUTH					35.7		0	0	0	0	0	0	0	0	0	0	0	0	0	0	0	0	0	0	0	0	0	0	0	0	0
240081	2017-04-04		2	2	1	1	1	0	FIREWOOD	0	0	0	0	0	0	0		FEVER					40		0	0	0	0	0	0	0	0	0	0	0	0	0	0	0	0	0	0	0	0	0	0	0	0	0
240084	2017-04-04	08:17:00	2	12	1	0	1	0	CHARCOAL	0	0	0	0	0	0	0		ANAL PAIN			102	95	36	5.28786	0	0	0	0	0	0	0	0	0	0	0	0	0	0	0	0	0	0	0	0	0	0	0	0	0
240134	2017-04-04		2	7	1	1	1	1	FIREWOOD	0	0	0	0	0	0	0		DIFFICULTY BREATHING			111	95	36.6	13.8504	0	0	0	0	0	0	0	0	0	0	0	0	0	0	0	0	0	0	0	0	0	0	0	0	0
240144	2017-04-03		2	11	1	0	1	0	CHARCOAL	0	1	1	0	1	0	0		FEVER/HEADACHE			174	94	37	16.8887	0	0	0	0	0	0	0	0	0	0	0	0	0	0	0	0	0	0	0	0	0	0	0	0	0
240147	2017-04-03		2	9	1	0	1	0	CHARCOAL	0	1	0	0	1	0	0		FEVER/MALAISE			156	96	37.9	14.2222	0	0	0	0	0	0	0	0	0	0	0	0	0	0	0	0	0	0	0	0	0	0	0	0	0
240175	2017-04-07	10:00:00	2	7	1	0	1	0	CHARCOAL	0	0	0	0	1	0	0		FEVER			122	98	39.6	41.9753	0	0	0	0	0	0	0	0	0	0	0	0	0	0	0	0	0	0	0	0	0	0	0	0	0
240487	2017-04-21	11:25:00	2	0	1	1	1	0	CHARCOAL	0	0	0	0	1	0	0		DIFFICULTY BREATHING			199	99	35.6	28.4024	0	0	0	0	0	0	0	0	0	0	0	0	0	0	0	0	0	0	0	0	0	0	0	0	0
240559	2017-04-30		2	8	1	1	1	0	CHARCOAL	0	0	0	0	0	0	0		DIARRHOEA			144	99	36.4		0	0	0	0	0	0	0	0	0	0	0	0	0	0	0	0	0	0	0	0	0	0	0	0	0
260078	2017-04-04	16:34:00	2	11	1	0	1	0	CHARCOAL	0	0	0	0	1	0	0		DIARRHOEA			135	90	37		0	0	0	0	0	0	0	0	0	0	0	0	0	0	0	0	0	0	0	0	0	0	0	0	0
260100	2017-04-05	14:00:00	2	5	1	1	1	0	CHARCOAL	1	0	0	0	0	0	0		FEVER	100	70	140	95	36	71.3436	0	0	0	0	0	0	0	0	0	0	0	0	0	0	0	0	0	0	0	0	0	0	0	0	0
260106	2017-04-05	09:56:00	2	9	1	1	1	0	CHARCOAL+FIREWOOD	0	0	0	0	1	0	0		FEVER/WEAKNESS	100	80	130	95	37	25.6	0	0	0	0	0	0	0	0	0	0	0	0	0	0	0	0	0	0	0	0	0	0	0	0	0
260108	2017-04-05	10:41:00	2	8	1	1	1	0	CHARCOAL	0	0	0	0	1	0	0		DIARRHOEA/CONSTIPATION	110	80	120	96	36.4	14.2687	0	0	0	0	0	0	0	0	0	0	0	0	0	0	0	0	0	0	0	0	0	0	0	0	0
260151	2017-04-06	15:10:00	2	3	1	1	1	0	CHARCOAL	0	0	1	0	0	0	0		FEVER/COUGH	89	59	151	99	40.2	17.0562	0	0	0	0	0	0	0	0	0	0	0	0	0	0	0	0	0	0	0	0	0	0	0	0	0
260172	2017-04-08	12:10:00	2	7	1	1	1	0	CHARCOAL	0	1	0	0	0	0	0		FEVER			149	94	37.9	18.3925	0	0	0	0	0	0	0	0	0	0	0	0	0	0	0	0	0	0	0	0	0	0	0	0	0
260199	2017-04-09		2	11	1	0	1	0	CHARCOAL	0	0	1	0	1	0	0		FEVER			160	98	36.7	15.5709	0	0	0	0	0	0	0	0	0	0	0	0	0	0	0	0	0	0	0	0	0	0	0	0	0
260245	2017-04-12	07:30:00	2	8	1	0	1	0	CHARCOAL	0	1	0	0	0	0	0		FEVER			196	95	38.9	19.1406	0	0	0	0	0	0	0	0	0	0	0	0	0	0	0	0	0	0	0	0	0	0	0	0	0
260277	2017-04-10		2	5	1	0	1	0	CHARCOAL+FIREWOOD	0	0	0	0	0	0	0		DIARRHOEA			106	97	36.8	20.0893	0	0	0	0	0	0	0	0	0	0	0	0	0	0	0	0	0	0	0	0	0	0	0	0	0
260323	2017-04-11		2	6	1	1	1	0	CHARCOAL	0	0	0	0	0	0	0		DIFFICULTY BREATHING			153	94	35.6	16.8032	0	0	0	0	0	0	0	0	0	0	0	0	0	0	0	0	0	0	0	0	0	0	0	0	0
260359	2017-04-15	08:40:00	2	11	1	0	1	0	CHARCOAL	0	0	0	0	0	0	0		COUGH	140	80	130	96	37.1	14.0739	0	0	0	0	0	0	0	0	0	0	0	0	0	0	0	0	0	0	0	0	0	0	0	0	0
260411	2017-04-18	12:00:00	2	8	1	1	1	0	CHARCOAL	0	0	0	0	0	0	0		FEVER/DIARRHOEA	50	20	82		40	21.3319	0	0	0	0	0	0	0	0	0	0	0	0	0	0	0	0	0	0	0	0	0	0	0	0	0
260449	2017-04-18		2	1	1	0	1	0	CHARCOAL	0	0	0	0	0	0	0		VOMITING/FEVERS			150		36.6	12.5	0	0	0	0	0	0	0	0	0	0	0	0	0	0	0	0	0	0	0	0	0	0	0	0	0
260550	2017-04-24	14:50:00	2	7	1	0	1	0	CHARCOAL	0	0	0	0	0	0	0		DIARRHOEA/VOMITING			159	92	37.1	19.7429	0	0	0	0	0	0	0	0	0	0	0	0	0	0	0	0	0	0	0	0	0	0	0	0	0
260578	2017-04-25	06:20:00	2	11	1	1	1	0	CHARCOAL	0	0	0	0	1	0	0		DIARRHOEA	120	65	123	99	35.7	11.2535	0	0	0	0	0	0	0	0	0	0	0	0	0	0	0	0	0	0	0	0	0	0	0	0	0
260580	2017-04-25	23:20:00	2	8	1	0	1	0	CHARCOAL	0	0	0	0	0	0	0		DIARRHOEA/VOMITING	120	80	124	95	39.2	17.8213	0	0	0	0	0	0	0	0	0	0	0	0	0	0	0	0	0	0	0	0	0	0	0	0	0
260643	2017-04-28		2	11	1	0	1	0	CHARCOAL	0	0	0	0	1	0	0		DIARRHOEA	90	50	101	89	37.9	15.6087	0	0	0	0	0	0	0	0	0	0	0	0	0	0	0	0	0	0	0	0	0	0	0	0	0
260654	2017-04-29	06:30:00	2	9	1	0	1	0	CHARCOAL	0	0	0	0	0	0	0		DIARRHOEA	90	60			35.3	19.7959	0	0	0	0	0	0	0	0	0	0	0	0	0	0	0	0	0	0	0	0	0	0	0	0	0
260686	2017-04-26	09:35:00	2	3	1	1	1	0	CHARCOAL	0	0	0	0	0	0	0		FEVER			96		36.3	15.8541	0	0	0	0	0	0	0	0	0	0	0	0	0	0	0	0	0	0	0	0	0	0	0	0	0
260711	2017-04-28	22:30:00	2	6	1	0	1	0	CHARCOAL	0	0	0	0	0	0	0		DIARRHOEA	40	20	185	98	36.4	14.651	0	0	0	0	0	0	0	0	0	0	0	0	0	0	0	0	0	0	0	0	0	0	0	0	0
918215	2017-10-01	10:24:00	2	10	1	1	1		CHARCOAL				0	1	0	0		ACUTE DIARRHEA	100	90			36.9	25.7202	0	0	0	0	0	0	0	0	0	0	0	0	0	0	0	0	0	0	0	0	0	0	0	0	0
918219	2017-10-01	15:45:00	2	10	1	0	1	1	CHARCOAL	1	0	0	0	1	0	0		DIARRHOEA	100	40			38.4	15.1384	0	0	0	0	0	0	0	0	0	0	0	0	0	0	0	0	0	0	0	0	0	0	0	0	0
918273	2017-10-03	13:48:00	2	8	1	0	1		CHARCOAL				0	1	0	0		FEVER/VOMITING	90	50	175	94	36.8		0	0	0	0	0	0	0	0	0	0	0	0	0	0	0	0	0	0	0	0	0	0	0	0	0
918283	2017-10-03	21:57:00	2	10	1	1	1	0		1	0	0	0	1	0	0		FEVER			124	98	36.1	18.1633	0	0	0	0	0	0	0	0	0	0	0	0	0	0	0	0	0	0	0	0	0	0	0	0	0
9182120	2017-10-04	05:56:00	2	12	1	0	1	0	CHARCOAL+FIREWOOD	0	0	0	0	1	0	0		FEVER/FAINTING	90	60	181	97	39.5		0	0	0	0	0	0	0	0	0	0	0	0	0	0	0	0	0	0	0	0	0	0	0	0	0
9182182	2017-10-06	15:32:00	2	6	1	1	1	0		1	0	0	0	0	0	0		ACUTE DIARRHEA	100	50	214	90	40.1	14.9519	0	0	0	0	0	0	0	0	0	0	0	0	0	0	0	0	0	0	0	0	0	0	0	0	0
9182189	2017-10-06	00:07:00	2	4	1	1	1	0	CHARCOAL	0	0	1	0	1	0	0		DIARRHOEA/DIFFICULTY BREATHING			168	82	36.9	17.8475	0	0	0	0	0	0	0	0	0	0	0	0	0	0	0	0	0	0	0	0	0	0	0	0	0
9182190	2017-10-07	04:14:00	2	2	1	1	1		FIREWOOD				1	1	0	0		DIFFICULTY BREATHING			160	78	36.7	13.9463	0	0	0	0	0	0	0	0	0	0	0	0	0	0	0	0	0	0	0	0	0	0	0	0	0
9182191	2017-10-07	05:11:00	2	7	1	1	1	0	CHARCOAL	0	0	0	0	0	0	0		DIARRHOEA/VOMITING	120	60	170	98	37.4	45.7064	0	0	0	0	0	0	0	0	0	0	0	0	0	0	0	0	0	0	0	0	0	0	0	0	0
9182313	2017-10-10	08:30:00	2	12	1	1	1	1	CHARCOAL	0	1	0	0	0	0	0		IRRITABILITY	80	40	92	72	36.4	19.4637	0	0	0	0	0	0	0	0	0	0	0	0	0	0	0	0	0	0	0	0	0	0	0	0	0
9182391	2017-10-12	10:58:00	2	12	1	1	1	0	FIREWOOD	0	1	0	0	1	0	0		WATERY DIARRHOEA			199	93	37.7	102.071	0	0	0	0	0	0	0	0	0	0	0	0	0	0	0	0	0	0	0	0	0	0	0	0	0
9182397	2017-10-12	14:05:00	2	10	1	1	1	0	CHARCOAL	0	0	0	0	1	0	0		FEVER			156	97	36.6	17.7515	0	0	0	0	0	0	0	0	0	0	0	0	0	0	0	0	0	0	0	0	0	0	0	0	0
9182470	2017-10-14	16:45:00	2	3	1	1	1	0	CHARCOAL	1	0	0	0	0	0	0		LACK OF SUCKING			134	80	38	13.3333	0	0	0	0	0	0	0	0	0	0	0	0	0	0	0	0	0	0	0	0	0	0	0	0	0
9182490	2017-10-15	10:08:00	2	1	1	1	1		CHARCOAL				0	1	0	0		FEVER	100	80	123		38.5	18.0802	0	0	0	0	0	0	0	0	0	0	0	0	0	0	0	0	0	0	0	0	0	0	0	0	0
9182501	2017-10-15	14:03:00	2	0	1	1	1	0	CHARCOAL	1	0	0	1	0	0	0		PREMATURE			121		36.7	8.88889	0	0	0	0	0	0	0	0	0	0	0	0	0	0	0	0	0	0	0	0	0	0	0	0	0
9182507	2017-10-15	15:45:00	2	8	1	1	1	0	GAS+CHARCOAL	1	0	1	0	0	0	0		GREENISH DIARRHOEA	100	70	123		35.9	18.3673	0	0	0	0	0	0	0	0	0	0	0	0	0	0	0	0	0	0	0	0	0	0	0	0	0
9182510	2017-10-15	16:29:00	2	6	1	1	1	0	CHARCOAL	1	0	0	0	1	0	0		WATERY DIARRHOEA	100	80	123		37.5	17.6367	0	0	0	0	0	0	0	0	0	0	0	0	0	0	0	0	0	0	0	0	0	0	0	0	0
9182515	2017-10-15	17:20:00	2	7	1	1	1	0	CHARCOAL	1	0	0	0	1	0	0		FEVER	100	70	123		37.6	14.2857	0	0	0	0	0	0	0	0	0	0	0	0	0	0	0	0	0	0	0	0	0	0	0	0	0
9182532	2017-10-16	04:57:00	2	10	1	0	1		CHARCOAL				0	1	0	0		DIARRHOEA/FEVER	90	40	90		37	16.8032	0	0	0	0	0	0	0	0	0	0	0	0	0	0	0	0	0	0	0	0	0	0	0	0	0
9182615	2017-10-17	10:16:00	2	6	1	0	1		CHARCOAL+ELECTRICITY				0	0	0	0		DIARRHOEA/FEVER/CONJUNCTIVITIS			110		36	19.3237	0	0	0	0	0	0	0	0	0	0	0	0	0	0	0	0	0	0	0	0	0	0	0	0	0
9182649	2017-10-17	22:05:00	2	0	1	1	1	0	CHARCOAL+GAS	1	1	1	0	0	0	0		FEVER					37	7.25799	0	0	0	0	0	0	0	0	0	0	0	0	0	0	0	0	0	0	0	0	0	0	0	0	0
9182754	2017-10-19	17:08:00	2	0	1	0	1	0	CHARCOAL	1	1	0	0	0	0	0		IRRITANT CRYING					37.9		0	0	0	0	0	0	0	0	0	0	0	0	0	0	0	0	0	0	0	0	0	0	0	0	0
9182842	2017-10-21	14:04:00	2	3	1	1	1		FIREWOOD				0	0	0	0		FEVER			123	97	37.3	19.0972	1	0	0	0	0	0	0	0	0	0	0	0	0	0	0	0	0	0	0	0	0	0	0	0	0
9182881	2017-10-22	08:11:00	2	15	1	0	1		CHARCOAL				0	0	0	0		FEVER	80	60	139	99	38.6	14.2201	0	0	0	0	0	0	0	0	0	0	0	0	0	0	0	0	0	0	0	0	0	0	0	0	0
9182950	2017-10-23	09:29:00	2	6	1	0	1		CHARCOAL+GAS				0	0	0	0		MOUTH WOUNDS					35.6	26	0	0	0	0	0	0	0	0	0	0	0	0	0	0	0	0	0	0	0	0	0	0	0	0	0
9182972	2017-10-23	14:43:00	2	8	1	1	1		CHARCOAL+GAS				0	0	0	0		DIARRHOEA/FEVER	100	50	93	94	38.7	16.4354	0	0	0	0	0	0	0	0	0	0	0	0	0	0	0	0	0	0	0	0	0	0	0	0	0
91821094	2017-10-25	21:48:00	2	4	1	0	1	1	CHARCOAL	0	0	0	0	0	0	0		VOMITING			136	95	36.4	19.7711	0	0	0	0	0	0	0	0	0	0	0	0	0	0	0	0	0	0	0	0	0	0	0	0	0
91821123	2017-10-26	14:36:00	2	3	1	1	1		CHARCOAL				0	0	0	0		FEVER/FECES WITH BLOOD	160	120	162	89	39.1	11.036	0	0	0	0	0	0	0	0	0	0	0	0	0	0	0	0	0	0	0	0	0	0	0	0	0
91821231	2017-10-28	19:42:00	2	4	1	1	1	0	CHARCOAL+GAS	1	0	0	0	0	0	0		DIARRHOEA	90	60	53	90	36.2	18.6982	0	0	0	0	0	0	0	0	0	0	0	0	0	0	0	0	0	0	0	0	0	0	0	0	0
91821275	2017-10-29	20:59:00	2	4	1	1	1		CHARCOAL				0	0	0	0		FREQUENT CRYING			153	99	32.8	18.2747	0	0	0	0	0	0	0	0	0	0	0	0	0	0	0	0	0	0	0	0	0	0	0	0	0
240042	2017-04-01		2	1	1	1	1	0	CHARCOAL+FIREWOOD+GAS	0	0	0	0	0	0	0		FEVER/DIFFICULTY SUCKING			147	99	35.8	15.3086	0	0	0	0	0	0	0	0	0	0	0	0	0	0	0	0	0	0	0	0	0	0	0	0	0
240288	2017-04-13	10:47:00	2	6	1	1	1	0	CHARCOAL+ELECTRICITY	0	0	1	0	0	0	0		VAGINAL BLEEDING			132		36.6	11.534	0	0	0	0	0	0	0	0	0	0	0	0	0	0	0	0	0	0	0	0	0	0	0	0	0
240344	2017-04-14	09:42:00	2	5	1	0	1	0	CHARCOAL	0	0	0	0	0	0	0		FEVER			134		39.3	13.125	0	0	0	0	0	0	0	0	0	0	0	0	0	0	0	0	0	0	0	0	0	0	0	0	0
260066	2017-04-04		2	1	1	1	1	0	FIREWOOD	0	0	0	0	0	0	0					162	94	35.3	11.8519	0	0	0	0	0	0	0	0	0	0	0	0	0	0	0	0	0	0	0	0	0	0	0	0	0
260256	2017-04-12		2	4	1	1	1	0	CHARCOAL	0	1	0	0	0	0	0		ABSENCE OF SUCKING REFLEX					37.1	13.6054	0	0	0	0	0	0	0	0	0	0	0	0	0	0	0	0	0	0	0	0	0	0	0	0	0
260581	2017-04-26		2	17	1	0	1	0	CHARCOAL	0	0	0	0	0	0	0		FEVER/MOUTH LESION	110	70	136	95	37.7	14.6092	0	0	0	0	0	0	0	0	0	0	0	0	0	0	0	0	0	0	0	0	0	0	0	0	0
9182183	2017-10-06	15:12:00	2	1	1	1	1	0	CHARCOAL+FIREWOOD	0	1	0	0	0	0	0		ABDOMINAL DISTENSION			160	96	38.1	8.74636	0	0	0	0	0	0	0	0	0	0	0	0	0	0	0	0	0	0	0	0	0	0	0	0	0
9182641	2017-10-17	17:37:00	2	15	1	0	1		FIREWOOD				0	0	0	0		FEVER/VOMITING/ABDOMINAL DISTENSION			160		37.6	11.7188	0	0	0	0	0	0	0	0	0	0	0	0	0	0	0	0	0	0	0	0	0	0	0	0	0
91821246	2017-10-29	09:10:00	2	8	1	0	1		CHARCOAL				0	0	0	0		FEVER/UMBILICAL ULCERATION			127	99	36.1	10.3806	0	0	0	0	0	0	0	0	0	0	0	0	0	0	0	0	0	0	0	0	0	0	0	0	0
9182461	2017-10-14	09:57:00	2	9	1	0	1		CHARCOAL									URINARY INCONTINENCE/LEFT ARM PAIN	130	99	99	98	36.3		0	0	0	0	0	0	0	0	0	0	0	0	0	0	0	0	0	0	0	0	0	0	0	0	0
9182899	2017-10-22	12:55:00	2	7	1	1	1	1	CHARCOAL	0	0	1						FEVER			197	97	40.1	10.2881	0	0	0	0	0	0	0	0	0	0	0	0	0	0	0	0	0	0	0	0	0	0	0	0	0
9182652	2017-10-18	05:48:00	2	10	1	0	1		CHARCOAL									LEFT ARM PAIN					36.1	165.289	0	0	0	0	0	1	0	0	0	0	0	0	0	0	0	0	0	0	0	0	0	0	0	0	0
91821157	2017-10-27	09:16:00	2	1	1	0	1	0	CHARCOAL	0	1	0						COUGH			135	92	36.4	20.4	0	0	0	0	0	0	0	0	0	0	0	0	0	0	0	0	0	0	0	0	0	0	0	0	0
91821453	2017-10-14	06:17:00	2	5	1	1	1	0	CHARCOAL	1	0	0						COUGH	110	80			37.7	22.2949	0	0	0	0	0	0	0	0	0	0	0	0	0	0	0	0	0	0	0	0	0	0	0	0	0
918281	2017-10-03	21:43:00	2	8	1	1	1		CHARCOAL									DIARRHOEA/VOMITING			98	98	38	37.5	0	0	0	0	0	0	0	0	0	0	0	0	0	0	0	0	0	0	0	0	0	0	0	0	0
9182199	2017-10-07	10:29:00	2	7	1	1	1		CHARCOAL									COUGH/FEVER			130	67	37.2	19.1736	0	0	0	0	0	0	0	0	0	0	0	0	0	0	0	0	0	0	0	0	0	0	0	0	0
9182758	2017-10-19	18:24:00	2	2	1	0	1	0	CHARCOAL	0	1	0						PUS FROM PENIS					36.4		0	0	0	0	0	0	0	0	0	0	0	0	0	0	0	0	0	0	0	0	0	0	0	0	0
9182108	2017-10-04	09:45:00	2	2	1	1	1		CHARCOAL									EAR PAIN			142	97	36.7		0	0	0	0	0	0	0	0	0	0	0	0	0	0	0	0	0	0	0	0	0	0	0	0	0
9182380	2017-10-12	06:21:00	2	10	1	0	1	0	CHARCOAL+GAS	1	0	0						DIARRHOEA	90	50	142	95	37	21.8211	0	0	0	0	0	0	0	0	0	0	0	0	0	0	0	0	0	0	0	0	0	0	0	0	0
9182955	2017-10-23	09:58:00	2	9	1	1	1	0	CHARCOAL	0	0	0						DRY COUGH/DIARRHOEA					36.4	19.1837	0	0	0	0	0	0	0	0	0	0	0	0	0	0	0	0	0	0	0	0	0	0	0	0	0
918271	2017-10-03	11:10:00	2	5	1	0	1		CHARCOAL									FEVER	80	60	157	97	37.2		0	0	0	0	0	0	0	0	0	0	0	0	0	0	0	0	0	0	0	0	0	0	0	0	0
918277	2017-10-03	17:49:00	2	8	1	1	1		CHARCOAL									DIARRHOEA/VOMITING	110	90			36.5		0	0	0	0	0	0	0	0	0	0	0	0	0	0	0	0	0	0	0	0	0	0	0	0	0
9182259	2017-10-09	04:40:00	2	2	1	0	1	0	CHARCOAL	0	0	1						FEVER/DIARRHOEA	90	60	176	99	38.4	10.7651	0	0	0	0	0	0	0	0	0	0	0	0	0	0	0	0	0	0	0	0	0	0	0	0	0
9182268	2017-10-09	08:06:00	2	8	1	1	1		CHARCOAL									VOMITING/DIARRHOEA			90	94	37.3	16.3769	0	0	0	0	0	0	0	0	0	0	0	0	0	0	0	0	0	0	0	0	0	0	0	0	0
9182367	2017-10-11	15:40:00	2	7	1	0	1											DIARRHOEA/VOMITING	100	70	147	100	37.2	22.2681	0	0	0	0	0	0	0	0	0	0	0	0	0	0	0	0	0	0	0	0	0	0	0	0	0
9182445	2017-10-13	19:08:00	2	12	1	1	1	0	CHARCOAL	0	1	0						DIARRHOEA/FEVER	110	80	103	91	37.4	26.9628	0	0	0	0	0	0	0	0	0	0	0	0	0	0	0	0	0	0	0	0	0	0	0	0	0
9182448	2017-10-13	21:11:00	2	4	1	1	1		CHARCOAL									VOMITING/FEVERS	100	90			37.1	21.3889	0	0	0	0	0	0	0	0	0	0	0	0	0	0	0	0	0	0	0	0	0	0	0	0	0
9182449	2017-10-13	21:55:00	2	1	1	1	1	0	CHARCOAL+FIREWOOD	0	1	0						FEVER/HOT BODY	110	90			38.7	11.036	0	0	0	0	0	0	0	0	0	0	0	0	0	0	0	0	0	0	0	0	0	0	0	0	0
9182513	2017-10-15	16:56:00	2	6	1	1	1	1	CHARCOAL	0	0	1						MOUTH WOUNDS	100	60	123		37.5	14.8652	0	0	0	0	0	0	0	0	0	0	0	0	0	0	0	0	0	0	0	0	0	0	0	0	0
9182713	2017-10-19	05:15:00	2	6	1	1	1	0	CHARCOAL	1	0	0						FEVER/CONVULSIONS	80	40	102	80	38	17.0898	0	0	0	0	0	0	0	0	0	0	0	0	0	0	0	0	0	0	0	0	0	0	0	0	0
91821136	2017-10-27	00:13:00	2	3	1	0	1	0	CHARCOAL	0	0	0						ABDOMINAL PAIN	110	60	189	90	37.8		0	0	0	0	0	0	0	0	0	0	0	0	0	0	0	0	0	0	0	0	0	0	0	0	0
91821138	2017-10-27	05:02:00	2	6	1	0	1		CHARCOAL									DIARRHOEA/VOMITING	110	80	136	89	38.3	17.4298	0	0	0	0	0	0	0	0	0	0	0	0	0	0	0	0	0	0	0	0	0	0	0	0	0
9182234	2017-10-08	10:09:00	2	7	2	1	1	0	CHARCOAL	0	1	0	0	0	1	0		FEVER	110	70	168	93	38		0	0	0	1	0	0	0	0	0	0	0	0	0	0	0	0	0	1	0	0	0	0	0	0	0
9182322	2017-10-10	10:39:00	2	8	2	0	1		CHARCOAL				0	0	1	0		FEVER/WEAKNESS			102	95	37	15.451	0	0	0	0	0	0	0	0	0	0	0	0	0	0	0	0	0	0	0	0	0	0	0	0	0
91821088	2017-10-25	17:39:00	2	2	2	0	1	0	CHARCOAL	0	0	1	0	1	1	0		COUGH/HOT BODY	89	55	134	96	37	11.1111	0	0	0	0	0	0	0	0	0	0	0	0	0	0	0	1	0	0	0	0	0	0	0	0	0
240488	2017-04-21		2	5	2	0	1	0	FIREWOOD	0	0	0	0	1	1	0		FACIAL SWELLING	119	99	154	99	36.2	19.9546	0	0	0	0	0	0	0	0	0	0	0	0	0	0	0	0	0	0	0	0	0	0	0	0	0
240312	2017-04-14	11:08:00	2	5	2	1	1	0	CHARCOAL	0	0	0	0	0	1	0		PAIN AND DEFORMITY OF RIGHT ARM			102	91	35.8	12.8419	0	0	0	0	0	0	0	1	0	0	0	0	0	0	0	0	0	0	0	0	0	0	0	0	0
260469	2017-04-20		2	7	2	0	1	0	CHARCOAL	1	0	0	0	0	1	0		DIFFICULTY BREATHING/ARM PAIN	120	50	146	99	38.1	13.7329	0	0	0	0	0	1	0	0	0	0	0	0	0	0	0	0	0	0	0	0	0	0	0	0	0
260486	2017-04-18	18:00:00	2	8	2	1	1	0	CHARCOAL	0	0	0	0	0	1	0		FALL			84		37.5	15.2778	0	0	0	0	0	0	0	0	0	0	0	0	0	0	0	0	0	0	1	0	0	0	0	0	0
260527	2017-04-19		2	5	2	1	1	0	CHARCOAL	0	0	0	0	1	1	0		VOMITING/GENERAL WEAKNESS	125	90	82	89	37.4	9.89315	0	0	0	0	0	0	0	0	0	0	0	0	0	0	0	0	0	0	0	0	0	0	0	0	0
9182132	2017-10-05	10:36:00	2	2	2	1	1	0	CHARCOAL	1	1	0	0	0	1	0		ITCHY BODY	100	90	135	92	36.9	17.2516	0	0	0	0	0	0	0	0	0	0	0	0	0	0	0	0	0	0	0	0	0	0	0	0	0
9182178	2017-10-06	15:22:00	2	6	2	0	1	1	CHARCOAL+ELECTRICITY	0	0	0	0	1	1	0		LEFT FOOT TRAUMA	120	90	126	99	37.9	14.958	0	0	0	0	0	0	0	0	0	0	0	0	0	0	0	0	0	0	0	1	0	0	0	0	0
9182366	2017-10-11	14:53:00	2	2	2	1	1	0	CHARCOAL	1	0	0	0	1	1	0		RIGHT KNEE WOUNDS AND PAIN POST TRAUMA	100	90	156	98	37.3	14.8611	0	0	0	1	0	0	0	0	0	0	0	0	0	0	0	0	0	0	0	0	0	0	0	0	0
91821054	2017-10-25	06:40:00	2	5	2	0	1	0	CHARCOAL	0	1	0	0	1	1	0		RIGHT FOOT PAIN POST FALL	160	70	107	90	36.4	12.9458	0	1	0	0	1	0	0	0	0	0	0	0	0	0	0	0	0	0	0	0	0	0	0	0	0
91821074	2017-10-25	11:25:00	2	4	2	0	1		CHARCOAL				0	0	1	0		LEFT FOREARM PAIN			114	99	36.7	14.0447	0	0	0	0	0	0	0	0	0	0	0	0	0	1	0	0	0	0	0	0	0	0	0	0	0
91821081	2017-10-25	13:03:00	2	3	2	0	1		CHARCOAL				0	0	1	0		LUMP IN EAR			118	98	37	15.1496	0	0	0	0	0	0	0	0	0	0	0	0	0	0	0	0	0	0	0	0	0	0	0	0	0
91821087	2017-10-25	17:09:00	2	6	2	0	1		CHARCOAL				0	1	1	0		LEFT FOREARM PAIN POST FREE FALL	90	60	104	90	37	15.6639	0	0	0	0	0	0	0	0	0	0	0	0	0	1	0	0	0	0	0	0	0	0	0	0	0
91821093	2017-10-25	21:29:00	2	2	2	0	1		CHARCOAL				0	1	1	0		FALL			100	93	36	16.3024	0	0	0	0	0	1	0	0	0	0	0	0	0	0	0	0	0	0	0	0	0	0	0	0	0
91821187	2017-10-27	19:02:00	2	7	2	1	1		CHARCOAL				0	1	1	0		STOMACH PAIN POST MOTOR VEHICLE ACCIDENT	100	80	102	99	36.7	16.256	0	0	0	0	0	0	0	0	0	0	0	0	0	0	0	0	0	0	0	0	1	0	0	0	0
91821188	2017-10-27	19:49:00	2	2	2	1	1		CHARCOAL				0	1	1	0		HEAD WOUNDS	100	70	134	96	36.6	15.4478	0	0	0	0	0	0	0	0	0	0	0	1	0	0	0	0	0	0	0	0	0	0	0	0	0
91821190	2017-10-27	20:53:00	2	1	2	0	1		CHARCOAL				0	0	1	0		RIGHT FOOT PAIN POST FREE FALL	100	70	109	97	35.9	16.9182	0	1	0	0	0	0	0	0	0	0	0	0	0	0	0	0	0	0	0	0	0	0	0	0	0
91821321	2017-10-30	20:39:00	2	2	2	0	1	1	FIREWOOD+CHARCOAL	0	0	0	0	1	1	0		INGESTION OF FOREIGN BODY/FALL	156	99	149	89	34.7	12.9962	0	0	0	0	0	0	0	0	0	0	0	0	0	0	1	0	0	0	0	0	0	0	0	0	0
91821330	2017-10-31	06:11:00	2	6	2	1	1		CHARCOAL				0	1	1	0		FALL	120	95	73	99	35	15.4599	0	0	0	0	0	1	0	0	0	0	0	0	0	0	0	0	0	0	0	0	0	0	0	0	0
91821024	2017-10-24	12:45:00	2	3	2	1	1		CHARCOAL+GAS				0	0	1	0		SCALP LESIONS/SWELLING			127	97	36.4	14.2399	0	0	0	0	0	0	0	0	0	0	0	0	0	0	0	0	0	0	0	0	0	0	0	0	0
91821079	2017-10-25	12:45:00	2	1	2	1	1	0	GAS	1	0	0	0	0	1	0		PIMPLES ON FACE/COUGH	100	60	130	99	36.4	17.1875	0	0	0	0	0	0	0	0	0	0	0	0	0	0	0	0	0	0	0	0	0	0	0	0	0
240197	2017-04-10	06:40:00	2	1	2	0	1	0	FIREWOOD	0	0	0	0	1	1	0		ASTHMA CRISIS			102	96	36	18.5803	0	0	0	0	0	0	0	0	0	0	0	0	0	0	0	0	0	0	0	0	0	0	0	0	0
240226	2017-04-11	10:00:00	2	1	2	0	1	0	CHARCOAL	1	1	1	0	0	1	0		DIFFICULTY BREATHING			59	89	36.6	18.2735	0	0	0	0	0	0	0	0	0	0	0	0	0	0	0	0	0	0	0	0	0	0	0	0	0
240393	2017-04-17	08:40:00	2	2	2	1	1	0	CHARCOAL	0	0	0	0	1	1	0		COUGH			146	87	37.5	19.052	0	0	0	0	0	0	0	0	0	0	0	0	0	0	0	0	0	0	0	0	0	0	0	0	0
240399	2017-04-18	22:30:00	2	1	2	0	1	0	CHARCOAL	0	0	0	0	0	1	0		DYSPNOEA	70	30	98		37	20.2395	0	0	0	0	0	0	0	0	0	0	0	0	0	0	0	0	0	0	0	0	0	0	0	0	0
240423	2017-04-20	05:29:00	2	2	2	0	1	0	CHARCOAL	0	0	0	0	0	1	0		COUGH/DIFFICULTY BREATHING	120	90	120	92	35.7	16.0494	0	0	0	0	0	0	0	0	0	0	0	0	0	0	0	0	0	0	0	0	0	0	0	0	0
240432	2017-04-21	20:04:00	2	1	2	1	1	0	CHARCOAL	1	0	1	0	0	1	0		HOT/COUGH	100	50	163	89	38.5	15.5464	0	0	0	0	0	0	0	0	0	0	0	0	0	0	0	0	0	0	0	0	0	0	0	0	0
240538	2017-04-29	20:10:00	2	5	2	0	1	0	CHARCOAL	0	0	0	0	0	1	0		DYSPNOEA	110	80	132	90	35.6	17.0726	0	0	0	0	0	0	0	0	0	0	0	0	0	0	0	0	0	0	0	0	0	0	0	0	0
260007	2017-04-02	08:32:00	2	8	2	1	1	0	CHARCOAL	0	0	0	0	0	1	0		NOT BREATHING WELL	136	90	111	98	36.3	15.7093	0	0	0	0	0	0	0	0	0	0	0	0	0	0	0	0	0	0	0	0	0	0	0	0	0
260171	2017-04-08	14:26:00	2	1	2	1	1	0	GAS+CHARCOAL	1	0	1	0	0	1	0		COUGH			139	93	36.8	17.4517	0	0	0	0	0	0	0	0	0	0	0	0	0	0	0	0	0	0	0	0	0	0	0	0	0
260205	2017-04-09		2	2	2	0	1	0	CHARCOAL	1	0	0	0	0	1	0		FEVER				95	38.4	16.5816	0	0	0	0	0	0	0	0	0	0	0	0	0	0	0	0	0	0	0	0	0	0	0	0	0
260209	2017-04-09	08:31:00	2	3	2	0	1	0	CHARCOAL	0	1	0	0	1	1	0		FEVER	95	56	135	98	37.4	14.7	0	0	0	0	0	0	0	0	0	0	0	0	0	0	0	0	0	0	0	0	0	0	0	0	0
260225	2017-04-08		2	5	2	0	1	0	CHARCOAL	0	1	0	0	0	1	0		COUGH/DIFFICULTY BREATHING	120	91	102	92	37	18.75	0	0	0	0	0	0	0	0	0	0	0	0	0	0	0	0	0	0	0	0	0	0	0	0	0
260326	2017-04-11	06:00:00	2	9	2	0	1	0	CHARCOAL	1	0	0	0	0	1	0		DIFFICULTY BREATHING	123	112	81	98	36.4	15.6956	0	0	0	0	0	0	0	0	0	0	0	0	0	0	0	0	0	0	0	0	0	0	0	0	0
260454	2017-04-20	09:15:00	2	1	2	1	1	0	CHARCOAL	1	0	0	0	1	1	0		HOT/COUGH	100	80	90	83	36.3	15.2416	0	0	0	0	0	0	0	0	0	0	0	0	0	0	0	0	0	0	0	0	0	0	0	0	0
260619	2017-04-28	10:18:00	2	9	2	0	1	0	CHARCOAL	0	0	0	0	0	1	0		COUGH/FEVER/DIFFICULTY BREATHING	110	90	145	85	36.7	18.0473	0	0	0	0	0	0	0	0	0	0	0	0	0	0	0	0	0	0	0	0	0	0	0	0	0
260633	2017-04-27		2	8	2	0	1	0	CHARCOAL	0	0	0	0	0	1	0		FEVER/DIFFICULTY BREATHING	110	90	121	94	39.5	13.8504	0	0	0	0	0	0	0	0	0	0	0	0	0	0	0	0	0	0	0	0	0	0	0	0	0
260725	2017-04-30	08:00:00	2	1	2	1	1	0	CHARCOAL	0	0	1	0	0	1	0		COUGH/FEVER	120	80	192	96	38.6	16.0938	0	0	0	0	0	0	0	0	0	0	0	0	0	0	0	0	0	0	0	0	0	0	0	0	0
918265	2017-10-03	07:25:00	2	5	2	0	1		CHARCOAL				0	0	1	0		COUGH/DIFFICULTY BREATHING	120	80	136	88	36.1	31.9009	0	0	0	0	0	0	0	0	0	0	0	0	0	0	0	0	0	0	0	0	0	0	0	0	0
9182106	2017-10-04	08:55:00	2	5	2	1	4		GAS+ELECTRICITY				0	0	1	0		FEVER	100	70	108	97	36.5	14.4099	0	0	0	0	0	0	0	0	0	0	0	0	0	0	0	0	0	0	0	0	0	0	0	0	0
9182107	2017-10-04	09:05:00	2	3	2	0	4		CHARCOAL+GAS				0	0	1	0		COUGH	90	60	122	96	36.7	15.1801	0	0	0	0	0	0	0	0	0	0	0	0	0	0	0	0	0	0	0	0	0	0	0	0	0
9182113	2017-10-04	12:35:00	2	3	2	0	1		GAS+CHARCOAL				0	0	1	0		FEVER	90	60	88	99	36.9	14.1497	0	0	0	0	0	0	0	0	0	0	0	0	0	0	0	0	0	0	0	0	0	0	0	0	0
9182115	2017-10-04	15:52:00	2	2	2	0	1		CHARCOAL				0	0	1	0		COUGH	70	50	120	95	36.9	13.8872	0	0	0	0	0	0	0	0	0	0	0	0	0	0	0	0	0	0	0	0	0	0	0	0	0
9182260	2017-10-09	04:47:00	2	3	2	1	1	0	CHARCOAL	1	0	0	0	1	1	0		DYSPNOEA	90	50	145	91	36.6	13.8744	0	0	0	0	0	0	0	0	0	0	0	0	0	0	0	0	0	0	0	0	0	0	0	0	0
9182302	2017-10-10	05:39:00	2	3	2	0	1	0	FIREWOOD+CHARCOAL	0	0	1	0	1	1	0		DIARRHOEA	89	42	79	69	36.4	8.97921	0	0	0	0	0	0	0	0	0	0	0	0	0	0	0	0	0	0	0	0	0	0	0	0	0
9182369	2017-10-11	16:22:00	2	5	2	1	1	0	CHARCOAL	0	0	0	0	1	1	0		HEAD PAIN/BLOOD IN NOSTRILS	120	70	108	98	37.8	14.7122	0	0	0	0	0	0	0	0	0	0	0	0	0	0	0	0	0	0	0	0	0	0	0	0	0
9182408	2017-10-12	22:49:00	2	3	2	0	1	0	CHARCOAL	1	0	0	1	0	1	0		FEVER/COUGH	100	60	88	43	37.1	13.9683	0	0	0	0	0	0	0	0	0	0	0	0	0	0	0	0	0	0	0	0	0	0	0	0	0
9182423	2017-10-13	09:31:00	2	5	2	0	1		CHARCOAL				0	1	1	0		FEVER/CHEST PAIN	110	60	143	90	39.1	15.7219	0	0	0	0	0	0	0	0	0	0	0	0	0	0	0	0	0	0	0	0	0	0	0	0	0
9182454	2017-10-14	08:20:00	2	1	2	0	1		CHARCOAL+GAS				0	1	1	0		ITCHING	100	80			36.1	14.5329	0	0	0	0	0	0	0	0	0	0	0	0	0	0	0	0	0	0	0	0	0	0	0	0	0
9182518	2017-10-15	17:59:00	2	2	2	1	1	0	CHARCOAL	1	1	0	0	1	1	0		COUGH	100	80	126		36	18.5185	0	0	0	0	0	0	0	0	0	0	0	0	0	0	0	0	0	0	0	0	0	0	0	0	0
9182575	2017-10-10	18:10:00	2	1	2	0	1		CHARCOAL+GAS				0	0	1	0		COUGH/VOMITING							0	0	0	0	0	0	0	0	0	0	0	0	0	0	0	0	0	0	0	0	0	0	0	0	0
9182588	2017-10-17	05:26:00	2	2	2	0	1		CHARCOAL				0	0	1	0		FEVER	102	69	92	60	37.1	11.3173	0	0	0	0	0	0	0	0	0	0	0	0	0	0	0	0	0	0	0	0	0	0	0	0	0
9182590	2017-10-17	05:38:00	2	1	2	0	1		CHARCOAL				0	0	1	0		DIFFICULTY BREATHING	90	50	89	79	36.9	17.3469	0	0	0	0	0	0	0	0	0	0	0	0	0	0	0	0	0	0	0	0	0	0	0	0	0
9182646	2017-10-17	20:13:00	2	9	2	1	1	0		1	0	0	0	1	1	0		COUGH	120	80			36.7	16.7966	0	0	0	0	0	0	0	0	0	0	0	0	0	0	0	0	0	0	0	0	0	0	0	0	0
9182670	2017-10-18	08:41:00	2	1	2	0	1	0	CHARCOAL	0	0	1	0	1	1	0		COUGH/HOT BODY/RHEUM	130	60	123		36.4	15.9505	0	0	0	0	0	0	0	0	0	0	0	1	0	0	0	0	0	0	0	0	0	0	0	0	0
9182770	2017-10-20	08:24:00	2	3	2	0	1	0	CHARCOAL	0	0	1	0	1	1	0		COUGH/HOT/LACK OF APPETITE	90	75	119	100	36.9		0	0	0	0	0	0	0	0	0	0	0	0	0	0	0	0	0	0	0	0	0	0	0	0	0
9182772	2017-10-20	08:33:00	2	8	2	0	1	0	ELECTRIC OVEN	1	0	0	0	1	1	0		FEVER/COUGH	100	80	79	99	36.5		0	0	0	0	0	0	0	0	0	0	0	0	0	0	0	0	0	0	0	0	0	0	0	0	0
9182797	2017-10-20	17:44:00	2	2	2	1	1						0	0	1	0		COUGH/DIFFICULTY BREATHING	90	65	168	93	37.1		0	0	0	0	0	0	0	0	0	0	0	0	0	0	0	0	0	0	0	0	0	0	0	0	0
9182817	2017-10-21	08:28:00	2	3	2	1	1		CHARCOAL				1	0	1	0		COUGH	110	70	99	89	37.3	18.1138	0	0	0	0	0	0	0	0	0	0	0	0	0	0	0	0	0	0	0	0	0	0	0	0	0
91821064	2017-10-25	09:04:00	2	2	2	0	1	0	CHARCOAL	1	0	1	0	1	1	0		HOT BODY/COUGH/DIFFICULTY BREATHING	102	60	139	96	36.2	14.5159	0	0	0	0	0	0	0	0	0	0	0	0	0	0	0	0	0	0	0	0	0	0	0	0	0
91821142	2017-10-27	06:08:00	2	6	2	0	1		CHARCOAL				0	0	1	0		DIFFICULTY BREATHING	100	55	99	97	36	14.6833	0	0	0	0	0	0	0	0	0	0	0	0	0	0	0	0	0	0	0	0	0	0	0	0	0
240489	2017-04-21		2	2	2	0	1	1	FIREWOOD	0	1	0	0	1	1	0		GENITAL SWELLING			150	99	37.2	15.9675	0	0	0	0	0	0	0	0	0	0	0	0	0	0	0	0	0	0	0	0	0	0	0	0	0
260325	2017-04-11		2	7	2	0	1	0	CHARCOAL	0	0	0	0	1	1	0		FEVER/BODY SWELLING	76	44	96	97	36.6	17.7048	0	0	0	0	0	0	0	0	0	0	0	0	0	0	0	0	0	0	0	0	0	0	0	0	0
260121	2017-04-07	09:50:00	2	2	2	1	4	0	CHARCOAL+ELECTRICITY	1	1	0	0	1	1	0		COUGH	79	57	116	96	36.9	13	0	0	0	0	0	0	0	0	0	0	0	0	0	0	0	0	0	0	0	0	0	0	0	0	0
9182830	2017-10-21	11:20:00	2	3	2	1	1	0	CHARCOAL	1	0	0	0	0	1	0		EAR PAIN	100	80	121	99	36.4	14.2253	1	0	0	0	0	0	0	0	0	0	0	0	0	0	0	0	0	0	0	0	0	0	0	0	0
260536	2017-04-24	07:00:00	2	2	2	1	1	0	CHARCOAL	0	1	0	0	1	1	0		DIARRHOEA WITHOUT SEVERE DEHYDRATION	110	80	143	93	36.4	13.7174	0	0	0	0	0	0	0	0	0	0	0	0	0	0	0	0	0	0	0	0	0	0	0	0	0
91821100	2017-10-26	06:30:00	2	2	2	0	1		CHARCOAL				0	1	1	0		DIARRHOEA			99	75	36.9	14.8721	0	0	0	0	0	0	0	0	0	0	0	0	0	0	0	0	0	0	0	0	0	0	0	0	0
240083	2017-04-03	22:23:00	2	4	2	1	1	0	GAS+FIREWOOD+CHARCOAL	0	0	0	0	0	1	0		ANAL PAIN			105	98	37	110.803	0	0	0	0	0	0	0	0	0	0	0	0	0	0	0	0	0	0	0	0	0	0	0	0	0
240121	2017-04-06		2	1	2	0	1	0	FIREWOOD	0	0	0	0	1	1	0		FEVER			187	97	39.4	18.5249	0	0	0	0	0	0	0	0	0	0	0	0	0	0	0	0	0	0	0	0	0	0	0	0	0
240174	2017-04-07		2	1	2	0	1	0	FIREWOOD	0	1	0	0	1	1	0		FEVER					37.6	17.9556	0	0	0	0	0	0	0	0	0	0	0	0	0	0	0	0	0	0	0	0	0	0	0	0	0
240490	2017-04-21	12:26:00	2	1	2	0	1	0	CHARCOAL	1	0	1	0	1	1	0		ABDOMINAL PAIN			146	95	36.5	13.564	0	0	0	0	0	0	0	0	0	0	0	0	0	0	0	0	0	0	0	0	0	0	0	0	0
240491	2017-04-21	12:06:00	2	4	2	0	1	0	CHARCOAL	1	0	0	0	1	1	0		FEVER	110	80	146	97	38.8	14.5833	0	0	0	0	0	0	0	0	0	0	0	0	0	0	0	0	0	0	0	0	0	0	0	0	0
240495	2017-04-21	15:00:00	2	3	2	1	1	0	CHARCOAL	0	0	0	0	1	1	0		FEVER			166	97	35.4	14.1777	0	0	0	0	0	0	0	0	0	0	0	0	0	0	0	0	0	0	0	0	0	0	0	0	0
260176	2017-04-08		2	1	2	0	1	0	CHARCOAL	0	1	0	0	1	1	0		FEVER			136	93	37.8	14.6605	0	0	0	0	0	0	0	0	0	0	0	0	0	0	0	0	0	0	0	0	0	0	0	0	0
260453	2017-04-20	10:30:00	2	3	2	0	1	0	CHARCOAL	1	0	0	0	1	1	0		DIARRHOEA/HOT/COUGH	110	60	139	99	36.1	16.276	0	0	0	0	0	0	0	0	0	0	0	0	0	0	0	0	0	0	0	0	0	0	0	0	0
260494	2017-04-18	11:24:00	2	3	2	1	1	0	CHARCOAL	0	0	1	0	1	1	0		VOMITING/DIARRHOEA/ITCHING			86		36	13.7447	0	0	0	0	0	0	0	0	0	0	0	0	0	0	0	0	0	0	0	0	0	0	0	0	0
260525	2017-04-19	03:06:00	2	1	2	1	1	0	CHARCOAL	0	0	0	0	0	1	0		FEVER	130	70	180	99	37.9	17.4861	0	0	0	0	0	0	0	0	0	0	0	0	0	0	0	0	0	0	0	0	0	0	0	0	0
260588	2017-04-26		2	3	2	1	1	0	CHARCOAL	0	0	0	0	1	1	0		FEVER	110	70	98	93	37.7	17.343	0	0	0	0	0	0	0	0	0	0	0	0	0	0	0	0	0	0	0	0	0	0	0	0	0
9182528	2017-10-15	21:09:00	2	5	2	1	1	0	GAS+CHARCOAL	1	0	0	0	1	1	0		FEVER/CONVULSIONS	100	60	143	96	38.9	17.6753	0	0	0	0	0	0	0	0	0	0	0	0	0	0	0	0	0	0	0	0	0	0	0	0	0
9182552	2017-10-16	10:20:00	2	3	2	0	1		CHARCOAL				0	0	1	0		FEVER/COUGH	115	60			37.6	14.9872	0	0	0	0	0	0	0	0	0	0	0	0	0	0	0	0	0	0	0	0	0	0	0	0	0
9182589	2017-10-17	05:35:00	2	3	2	0	1		CHARCOAL				0	0	1	0		DIARRHOEA/FEVER	119	62	89	79	37.8	12.2537	0	0	0	0	0	0	0	0	0	0	0	0	0	0	0	0	0	0	0	0	0	0	0	0	0
9182643	2017-10-17	19:20:00	2	2	2	0	1		CHARCOAL				0	1	1	0		FEVER	100	40	81	90	38.4	90.8304	0	0	0	0	0	0	0	0	0	0	0	0	0	0	0	0	0	0	0	0	0	0	0	0	0
9182644	2017-10-17	19:28:00	2	2	2	0	1	0	CHARCOAL	1	0	1	0	1	1	0		COUGH/FEVER	100	20			38	78.7037	0	0	0	0	0	0	0	0	0	0	0	0	0	0	0	0	0	0	0	0	0	0	0	0	0
9182674	2017-10-18	09:06:00	2	2	2	1	1	0	CHARCOAL	0	0	0	0	1	1	0		HOT BODY/DIARRHOEA	164	93	183		37.4	14.4208	0	0	0	0	0	0	0	0	0	0	0	0	0	0	0	0	0	0	0	0	0	0	0	0	0
9182680	2017-10-18	09:52:00	2	6	2	1	1	0	CHARCOAL	1	0	0	0	1	1	0		ALL-OVER SICKNESS/COUGH	90	45	153		38.9	13.2053	0	0	0	0	0	0	0	0	0	0	0	0	0	0	0	0	0	0	0	0	0	0	0	0	0
9182686	2017-10-18	10:42:00	2	4	2	1	1	0	CHARCOAL	1	0	1	0	0	1	0		DRY COUGH/HOT	120	80	162		36.4	16.6205	0	0	0	0	0	0	0	0	0	0	0	0	0	0	0	0	0	0	0	0	0	0	0	0	0
9182710	2017-10-18	22:55:00	2	3	2	1	1	0	CHARCOAL	1	0	0	0	1	1	0		FEVER/CONVULSIONS	90	40	134	98	36.5		0	0	0	0	0	0	0	0	0	0	0	0	0	0	0	0	0	0	0	0	0	0	0	0	0
9182791	2017-10-20	14:39:00	2	1	2	0	1		CHARCOAL				0	1	1	0		HOT BODY/FAINT	75	56	158	94	38.1	13.5336	0	0	0	0	0	0	0	0	0	0	1	0	0	0	0	0	0	0	0	0	0	0	0	0	0
9182792	2017-10-20	15:25:00	2	1	2	1	1	0	CHARCOAL	1	0	0	0	0	1	0		COUGH/HOT BODY	90	75	125	95	37.8	15.1695	0	0	0	0	0	0	0	0	0	0	0	0	0	0	0	0	0	0	0	0	0	0	0	0	0
9182823	2017-10-21	09:37:00	2	1	2	0	1		CHARCOAL				0	0	1	0		FEVER	100	80	123	95	38	17.5409	1	0	0	0	0	0	0	0	0	0	0	0	0	0	0	0	0	0	0	0	0	0	0	0	0
9182847	2017-10-21	15:28:00	2	1	2	0	1		CHARCOAL				0	0	1	0		FEVER	100	80	125	98	38.6	14.4795	1	0	0	0	0	0	0	0	0	0	0	0	0	0	0	0	0	0	0	0	0	0	0	0	0
91821047	2017-10-25	03:32:00	2	3	2	0	1		CHARCOAL				0	1	1	0		ABDOMINAL PAIN	130	95	120	99	34.9	14.5089	0	0	0	0	0	0	0	0	0	0	0	0	0	0	0	0	0	0	0	0	0	0	0	0	0
91821096	2017-10-25	22:17:00	2	7	2	1	1		CHARCOAL				0	1	1	0		FEVER	110	90	140	99	38.3	14.72	0	0	0	0	0	0	0	0	0	0	0	0	0	0	0	0	0	0	0	0	0	0	0	0	0
91821143	2017-10-28	06:20:00	2	7	2	1	1		CHARCOAL				0	1	1	0		SORE THROAT/FEVER	120	90	142	99	38.5	22.0118	0	0	0	0	0	0	0	0	0	0	0	0	0	0	0	0	0	0	0	0	0	0	0	0	0
91821193	2017-10-27	22:50:00	2	9	2	0	1		CHARCOAL+GAS				0	1	1	0		COUGH/HOT	110	80	136	88	37.6	27.5238	0	0	0	0	0	0	0	0	0	0	0	0	0	0	0	0	0	0	0	0	0	0	0	0	0
240040	2017-04-01		2	1	2	0	1	0	CHARCOAL	0	0	0	0	0	0	0		YELLOWING OF THE EYES AND URINE			112	90	33.7	19.5159	0	0	0	0	0	0	0	0	0	0	0	0	0	0	0	0	0	0	0	0	0	0	0	0	0
240143	2017-04-03	15:17:00	2	2	2	0	1	0	CHARCOAL	1	1	1	0	1	0	0		FEVER			136	98	37	12.3457	0	0	0	0	0	0	0	0	0	0	0	0	0	0	0	0	0	0	0	0	0	0	0	0	0
240149	2017-04-03		2	1	2	1	1	0	FIREWOOD+CHARCOAL	0	1	0	0	0	0	0		FEVER/CONVULSIONS			147	91	36.9	14.4492	0	0	0	0	0	0	0	0	0	0	0	0	0	0	0	0	0	0	0	0	0	0	0	0	0
240255	2017-04-12	07:00:00	2	7	2	1	1	0	CHARCOAL	0	0	0	0	0	0	0		FEVER			122	98	37.8	16.7411	0	0	0	0	0	0	0	0	0	0	0	0	0	0	0	0	0	0	0	0	0	0	0	0	0
240291	2017-04-13	14:08:00	2	2	2	1	1	0	CHARCOAL	0	0	0	0	0	0	0		FAINT			118	92	36.8	13.7024	0	0	0	0	0	0	0	0	0	0	0	0	0	0	0	0	0	0	0	0	0	0	0	0	0
240305	2017-04-14	18:20:00	2	1	2	1	1	0	CHARCOAL	0	0	0	0	1	0	0		FEVER/VOMITING			108		37	15.7785	0	0	0	0	0	0	0	0	0	0	0	0	0	0	0	0	0	0	0	0	0	0	0	0	0
240343	2017-04-14	14:09:00	2	2	2	1	1	0	CHARCOAL	0	0	0	0	1	0	0		CONVULSIONS			180		38.8	18.2812	0	0	0	0	0	0	0	0	0	0	0	0	0	0	0	0	0	0	0	0	0	0	0	0	0
240502	2017-04-25	11:13:00	2	1	2	0	1	0	CHARCOAL	0	1	0	0	0	0	0		FEVER	100	60	142	98	36.1		0	0	0	0	0	0	0	0	0	0	0	0	0	0	0	0	0	0	0	0	0	0	0	0	0
240527	2017-04-27	10:36:00	2	3	2	1	1	0	CHARCOAL+ENERGY	0	0	0	0	0	0	0		FEVER/DIARRHOEA	100	70	113	99	36.4	15.1299	0	0	0	0	0	0	0	0	0	0	0	0	0	0	0	0	0	0	0	0	0	0	0	0	0
260075	2017-04-04	16:50:00	2	6	2	1	1	0	CHARCOAL	1	0	0	0	0	0	0		FEVER	109	90	125	97	35	14.3121	0	0	0	0	0	0	0	0	0	0	0	0	0	0	0	0	0	0	0	0	0	0	0	0	0
260414	2017-04-19	11:14:00	2	8	2	1	1	0	CHARCOAL	0	0	0	0	0	0	0		STOMACH PAIN	120	90	100		37.4	16.3425	0	0	0	0	0	0	0	0	0	0	0	0	0	0	0	0	0	0	0	0	0	0	0	0	0
260416	2017-04-19	11:30:00	2	4	2	0	1	0		0	0	0	0	0	0	0		FEVER	102	65	130	98	37.5	14.6092	0	0	0	0	0	0	0	0	0	0	0	0	0	0	0	0	0	0	0	0	0	0	0	0	0
260484	2017-04-16	06:16:00	2	5	2	0	1	0	CHARCOAL	0	0	0	0	1	0	0		HOT BODY/WEAKNESS	120	70	98	94	36.5	11.9579	0	0	0	0	0	0	0	0	0	0	0	0	0	0	0	0	0	0	0	0	0	0	0	0	0
260498	2017-04-18		2	3	2	0	1	0	CHARCOAL	0	0	0	0	1	0	0		FEVER/FAINTING			88		38.1	13.536	0	0	0	0	0	0	0	0	0	0	0	0	0	0	0	0	0	0	0	0	0	0	0	0	0
260600	2017-04-27	08:00:00	2	3	2	0	1	0	CHARCOAL	0	0	0	0	0	0	0		FEVER	102	51	122	92	37.9	15.191	0	0	0	0	0	0	0	0	0	0	0	0	0	0	0	0	0	0	0	0	0	0	0	0	0
918275	2017-10-03	15:31:00	2	7	2	0	1		CHARCOAL				0	0	0	0		FEVER/WEAKNESS	90	65	134	98	38.9		0	0	0	0	0	0	0	0	0	0	0	0	0	0	0	0	0	0	0	0	0	0	0	0	0
9182157	2017-10-05	21:00:00	2	5	2	0	1	0	CHARCOAL	1	0	0	0	1	0	0		FALL	120	84	139	98	38.4		0	0	0	0	0	0	0	0	0	0	0	0	0	0	0	0	0	0	0	0	0	0	0	0	0
9182262	2017-10-09	05:54:00	2	6	2	0	1		CHARCOAL				0	1	0	0		FEVER/ABDOMINAL PAIN	100	55	100	98	40.2	16	0	0	0	0	0	0	0	0	0	0	0	0	0	0	0	0	0	0	0	0	0	0	0	0	0
9182407	2017-10-12	21:50:00	2	2	2	0	1	0	CHARCOAL	0	0	0	0	1	0	0		FEVER	80	60	119	98	36.1	144.444	0	0	0	0	0	0	0	0	0	0	0	0	0	0	0	0	0	0	0	0	0	0	0	0	0
9182424	2017-10-13	09:59:00	2	4	2	1	1		CHARCOAL				0	1	0	0		NOSE BLEED	127	76	93	98	36.2	24.2188	0	0	0	0	0	0	0	0	0	0	0	0	0	0	0	0	0	0	0	0	0	0	0	0	0
9182541	2017-10-16	08:07:00	2	3	2	1	1		CHARCOAL				0	1	0	0		INTERMITTENT FEVER	100	60			35.2	15.4102	0	0	0	0	0	0	0	0	0	0	0	0	0	0	0	0	0	0	0	0	0	0	0	0	0
9182579	2017-10-16	18:20:00	2	4	2	0	4		CHARCOAL				0	0	0	0		FEVER/HEADACHE	100	70			37.3	13.6742	0	0	0	0	0	0	0	0	0	0	0	0	0	0	0	0	0	0	0	0	0	0	0	0	0
9182724	2017-10-19	08:16:00	2	3	2	1	1	0	CHARCOAL+GAS	0	1	1	1	0	0	0		FEVER	120	100	121	95	36.7	14.7929	0	0	0	0	0	0	0	0	0	0	0	0	0	0	0	0	0	0	0	0	0	0	0	0	0
9182865	2017-10-21	20:13:00	2	4	2	1	1	0	CHARCOAL	1	0	0	0	1	0	0		EPISTAXIS	110	60	117	96	35.9	20.4959	1	0	0	0	0	0	0	0	0	0	0	0	0	0	0	0	0	0	0	0	0	0	0	0	0
9182976	2017-10-23	16:29:00	2	1	2	0	1		CHARCOAL				0	0	0	0		FEVER	100	90	111	100	36.6	15.7311	0	0	0	0	0	0	0	0	0	0	0	0	0	0	0	0	0	0	0	0	0	0	0	0	0
91821014	2017-10-24	10:48:00	2	1	2	0	1		CHARCOAL				0	0	0	0		CONVULSIONS/FEVER			145	90	38.8	15.6147	1	0	0	0	0	0	0	0	0	0	0	0	0	0	0	0	0	0	0	0	0	0	0	0	0
91821099	2017-10-26	05:40:00	2	1	2	0	1	1	CHARCOAL	1	0	0	0	0	0	0		FEVER			114	99	38.7	14.8438	0	0	0	0	0	0	0	0	0	0	0	0	0	0	0	0	0	0	0	0	0	0	0	0	0
91821105	2017-10-26	08:49:00	2	2	2	1	1		CHARCOAL				0	0	0	0		FEVER	142	90	190	99	36.6	18.5235	0	0	0	0	0	0	0	0	0	0	0	0	0	0	0	0	0	0	0	0	0	0	0	0	0
91821184	2017-10-27	17:43:00	2	1	2	0	1	0	CHARCOAL	1	1	0	0	1	0	0		FEVER			162	99	39.5	18.5529	0	0	0	0	0	0	0	0	0	0	0	0	0	0	0	0	0	0	0	0	0	0	0	0	0
91821318	2017-10-30	18:35:00	2	7	2	0	1		CHARCOAL				0	0	0	0		FEVER/FAINTING	110	60	98	99	36.1	15.1825	0	0	0	0	0	0	0	0	0	0	0	0	0	0	0	0	0	0	0	0	0	0	0	0	0
240176	2017-04-07		2	8	2	0	1	0	CHARCOAL	0	1	0	0	1	0	0		STOMACH SWELLING			121	98	37.3	15.1773	0	0	0	0	0	0	0	0	0	0	0	0	0	0	0	0	0	0	0	0	0	0	0	0	0
240254	2017-04-11		2	3	2	0	1	0	FIREWOOD	0	0	0	0	1	0	0		ABDOMINAL MASS/FEVER			170	99	39.1	15.3592	0	0	0	0	0	0	0	0	0	0	0	0	0	0	0	0	0	0	0	0	0	0	0	0	0
9182185	2017-10-06	10:07:00	2	6	2	1	1		CHARCOAL				1	0	0	0		ABDOMINAL DISTENSION	100	80	147	95	37.2	13.5044	0	0	0	0	0	0	0	0	0	0	0	0	0	0	0	0	0	0	0	0	0	0	0	0	0
240039	2017-04-01		2	6	2	1	1	0	CHARCOAL	0	0	0	0	0	0	0		PAIN AND LIMITATION MOVING RIGHT ELBOW			95	92	35.5	20.0851	0	0	0	0	0	0	1	0	0	0	0	0	0	0	0	0	0	0	0	0	0	0	0	0	0
240041	2017-04-01		2	3	2	1	1	0	CHARCOAL	0	0	0	0	0	0	0		RIGHT FOREARM PAIN			56	97	35	15.3643	0	0	0	0	0	0	0	1	0	0	0	0	0	0	0	0	0	0	0	0	0	0	0	0	0
240046	2017-04-01		2	7	2	0	1	0	CHARCOAL	0	0	0	0	0	0	0		IRRITABILITY/APHASIA AFTER FIGHT			22	98	35	17.1429	0	0	0	0	0	0	0	0	0	0	0	1	0	0	0	0	0	0	0	0	0	0	0	0	0
240122	2017-04-06	15:47:00	2	4	2	0	1	0	CHARCOAL	0	0	0	0	1	0	0		LEFT ARM PAIN			113	93	37.4	16.7924	0	0	0	0	0	0	0	0	0	0	0	0	0	1	0	0	0	0	0	0	0	0	0	0	0
240126	2017-04-06	13:05:00	2	4	2	0	1	0	GAS	0	0	0	0	0	0	0		FACIAL ABRASIONS	84	46	112	98	36.7	15.1467	0	0	0	0	0	0	0	0	0	0	0	1	0	0	0	0	0	0	0	0	0	0	0	0	0
240133	2017-04-04	23:30:00	2	2	2	1	1	1	CHARCOAL	0	0	0	0	1	0	0		NOSE BLEED			112	90	37	17.8475	0	0	0	0	0	0	0	0	0	0	0	1	0	0	0	0	0	0	0	0	0	0	0	0	0
240178	2017-04-07	15:05:00	2	6	2	0	1	0	CHARCOAL	0	1	0	0	1	0	0		TRAUMA OF LEFT WRIST	102	83	127	91	36	16.3333	0	0	0	0	0	0	0	0	0	0	0	0	0	1	0	0	0	0	0	0	0	0	0	0	0
240179	2017-04-07	15:31:00	2	2	2	0	1	0	CHARCOAL	1	1	0	0	1	0	0		FALL ON RIGHT WRIST			85	79	36.7	15.4959	0	0	0	0	0	1	0	0	0	0	0	0	0	0	0	0	0	0	0	0	0	0	0	0	0
240190	2017-04-10		2	4	2	0	1	0	CHARCOAL	0	1	0	0	1	0	0		RIGHT LEG PAIN			105	97	36	17.4	0	0	0	0	0	0	0	0	0	0	0	0	0	0	0	0	0	0	1	0	0	0	0	0	0
240191	2017-04-09	00:01:00	2	4	2	0	1	0	GAS	0	0	0	0	1	0	0		PRURITUS	104	71	105	98	36.6	20.5	0	0	0	0	0	0	0	0	0	0	0	0	0	0	0	0	0	0	0	0	0	0	0	0	0
240247	2017-04-11		2	7	2	0	1	0	FIREWOOD	0	0	0	0	1	0	0		ELBOW PAIN AND SWELLING	109	91	146	96	37.4	14.2361	0	0	0	0	0	0	1	0	0	0	0	0	0	0	0	0	0	0	0	0	0	0	0	0	0
240251	2017-04-12	20:15:00	2	1	2	0	1	0	CHARCOAL	0	0	0	0	0	0	0		LEFT KNEE PAIN				98	36.6	16.0231	0	0	0	0	0	0	0	0	0	0	0	0	0	0	0	0	0	1	0	0	0	0	0	0	0
240266	2017-04-10	19:40:00	2	8	2	0	1	0	CHARCOAL+FIREWOOD	0	0	0	0	0	0	0		RIGHT ARM PAIN	121	81	101	97	36.6	15.1384	0	0	0	0	0	0	0	0	0	0	0	0	0	1	0	0	0	0	0	0	0	0	0	0	0
240278	2017-04-13	17:55:00	2	5	2	0	1	0	CHARCOAL	0	0	0	0	0	0	0		RIGHT FOREARM PAIN			114	97	37.7	14.2649	0	0	0	0	0	1	0	0	0	0	0	0	0	0	0	0	0	0	0	0	0	0	0	0	0
240280	2017-04-13	15:49:00	2	2	2	1	1	0	CHARCOAL	0	0	0	0	0	0	0		LEFT FOOT PAIN			149	98	36	13.2118	0	0	0	0	0	0	0	0	0	0	0	0	0	0	0	0	0	0	0	1	0	0	0	0	1
240306	2017-04-14	16:30:00	2	5	2	1	1	0	CHARCOAL	0	0	0	0	0	0	0		RIGHT SHOULDER PAIN AND SWELLING			144	97	37.3	14.1461	0	0	0	0	0	0	0	0	1	0	0	0	0	0	0	0	0	0	0	0	0	0	0	0	0
240308	2017-04-14	19:47:00	2	5	2	0	1	0	CHARCOAL	0	0	0	0	1	0	0		LEFT ELBOW PAIN AND SWELLING			119	97	36.9	13.5484	0	0	0	0	0	0	0	0	0	0	0	0	0	0	1	0	0	0	0	0	0	0	0	0	0
240311	2017-04-14	12:15:00	2	8	2	1	1	0	CHARCOAL+FIREWOOD	0	0	0	0	0	0	0		PAIN AND DEFORMITY OF LEFT ARM	97	65	120	96	35.6	22.7811	0	0	0	0	0	0	0	0	0	0	0	0	0	0	1	0	0	0	0	0	0	0	0	0	0
240313	2017-04-14	10:50:00	2	7	2	1	1	1	CHARCOAL+FIREWOOD	0	0	0	0	1	0	0		FOREIGN BODY IN LEFT EAR	102	69	103	98	36.7	14.8295	0	0	0	0	0	0	0	0	0	0	0	1	0	0	0	0	0	0	0	0	0	0	0	0	0
240314	2017-04-14	10:12:00	2	5	2	0	1	0	CHARCOAL+FIREWOOD	0	0	0	0	1	0	0		RIGHT ELBOW PAIN AND SWELLING	86	68	143	98	37.9	14.966	0	0	0	0	0	0	1	0	0	0	0	0	0	0	0	0	0	0	0	0	0	0	0	0	0
240316	2017-04-14	09:27:00	2	1	2	0	1	0	CHARCOAL+FIREWOOD	0	0	0	0	0	0	0		LEFT ARM PAIN			126	98	36.3	9.14318	0	0	0	0	0	0	0	0	0	0	0	0	0	0	0	1	0	0	0	0	0	0	0	0	0
240318	2017-04-14	07:17:00	2	9	2	0	1	0	CHARCOAL	0	0	0	0	0	0	0		SHOULDER PAIN	87	64	100	85	36.2	24.3478	0	0	0	0	0	0	0	0	0	0	0	0	1	0	0	0	0	0	0	0	0	0	0	0	0
240380	2017-04-18	13:30:00	2	5	2	1	1	0	CHARCOAL	0	0	0	0	1	0	0		RIGHT KNEE PAIN			110	98	36.6	13.6721	0	0	0	1	0	0	0	0	0	0	0	0	0	0	0	0	0	0	0	0	0	0	0	0	0
240382	2017-04-18	15:50:00	2	3	2	1	1	0	CHARCOAL	0	0	0	0	1	0	0		FOREIGN BODY IN NOSE			126	94	36.2	20.0773	0	0	0	0	0	0	0	0	0	0	0	1	0	0	0	0	0	0	0	0	0	0	0	0	0
240383	2017-04-18	15:00:00	2	3	2	1	1	0	CHARCOAL	0	0	0	0	0	0	0		LEFT ARM PAIN			142	99	36.7	13.9202	0	0	0	0	0	0	0	0	0	0	0	0	0	0	1	0	0	0	0	0	0	0	0	0	0
240398	2017-04-18	23:20:00	2	2	2	0	1	0	CHARCOAL	0	0	0	0	1	0	0		RIGHT ELBOW PAIN	70	40	110		36.8	16.3593	0	0	0	0	0	0	1	0	0	0	0	0	0	0	0	0	0	0	0	0	0	0	0	0	0
240400	2017-04-18		2	2	2	0	1	0	CHARCOAL	0	0	0	0	0	0	0		RIGHT LOWER LIMB PAIN	60	30	100		36.4	16.8032	0	0	0	0	1	0	0	0	0	0	0	0	0	0	0	0	0	0	0	0	0	0	0	0	0
240405	2017-04-18	15:30:00	2	2	2	0	1	0	CHARCOAL	0	0	0	0	1	0	0		RIGHT FOOT PAIN			105	98	37.1	18.7255	0	1	0	0	0	0	0	0	0	0	0	0	0	0	0	0	0	0	0	0	0	0	0	0	0
240414	2017-04-19	17:00:00	2	5	2	1	1	0	FIREWOOD	0	0	0	0	0	0	0		DEFORMITY OF LEFT ELBOW	102	80	100	99	36.7	17.7594	0	0	0	0	0	0	0	0	0	0	0	0	0	1	0	0	0	0	0	0	0	0	0	0	0
240416	2017-04-20	21:45:00	2	3	2	1	1	0	CHARCOAL	1	0	0	0	1	0	0		EAR PAIN	125	90	106	99	35.2	18.75	0	0	0	0	0	0	0	0	0	0	0	1	0	0	0	0	0	0	0	0	0	0	0	0	0
240448	2017-04-23		2	2	2	1	1	0	CHARCOAL	0	0	0	0	0	0	0		FALL			102	96	37	33.3333	0	0	0	0	0	0	0	0	0	0	0	0	0	0	0	0	1	0	0	0	0	0	0	0	0
240462	2017-04-23	17:00:00	2	4	2	0	1	0	CHARCOAL	1	1	0	0	1	0	0		FOREIGN BODY IN NOSE	120	70	123	99	36	8.26446	0	0	0	0	0	0	0	0	0	0	0	1	0	0	0	0	0	0	0	0	0	0	0	0	0
240464	2017-04-23	14:06:00	2	3	2	0	1	0	CHARCOAL	1	0	1	0	1	0	0		WOUND IN SUPRA PALPEBRAL REGION	110	60	120	100	36	18.75	0	0	0	0	0	0	0	0	0	0	0	1	0	0	0	0	0	0	0	0	0	0	0	0	0
240465	2017-04-23	15:00:00	2	3	2	0	1	0	CHARCOAL	0	0	0	0	1	0	0		INGESTION OF FOREIGN BODY	100	70	110	99	36	19.9308	0	0	0	0	0	0	0	0	0	0	0	0	0	0	0	0	0	0	0	0	0	0	0	0	0
240501	2017-04-25	14:48:00	2	6	2	0	1	0	CHARCOAL	0	0	0	0	0	0	0		ARM PAIN	120	55	140	99	36.9	18.4328	0	0	0	0	0	0	0	0	0	0	0	0	0	0	1	0	0	0	0	0	0	0	0	0	0
240505	2017-04-25	08:56:00	2	8	2	1	1	0	CHARCOAL	0	0	0	0	0	0	0		ULCERATIVE LESIONS ??	120	70	121	99	35.9	13.76	0	0	0	0	0	0	0	0	0	0	0	0	0	1	0	0	0	0	0	0	0	0	0	0	0
260009	2017-04-02	10:22:00	2	2	2	1	1	0	CHARCOAL	0	0	0	0	0	0	0		RIGHT ARM PAIN	110	80	125	99	36.7	19.1003	0	0	0	0	0	0	1	0	0	0	0	0	0	0	0	0	0	0	0	0	0	0	0	0	0
260025	2017-04-02	15:11:00	2	9	2	0	1	0	CHARCOAL	0	0	0	0	0	0	0		LEFT ELBOW PAIN	110	80	111	98	36.6	17.5323	0	0	0	0	0	0	0	0	0	0	0	0	0	0	1	0	0	0	0	0	0	0	0	0	0
260026	2017-04-02	16:00:00	2	7	2	0	1	0	FIREWOOD	0	0	0	0	1	0	0		LEFT ARM PAIN	110	80	138	98	36.9	14.3086	0	0	0	0	0	0	0	0	0	0	0	0	0	1	0	0	0	0	0	0	0	0	0	0	0
260033	2017-04-02	19:03:00	2	5	2	0	1	0	CHARCOAL	0	0	0	0	0	0	0		LEFT ELBOW PAIN	110	80	116	98	36.7	9.72222	0	0	0	0	0	0	0	0	0	0	0	0	0	0	1	0	0	0	0	0	0	0	0	0	0
260041	2017-04-02	19:40:00	2	5	2	0	1	0	CHARCOAL	0	0	0	0	0	0	0		RIGHT FOOT PAIN POST FREE FALL	110	80	104	84	36.5	12.5	0	1	0	0	0	0	0	0	0	0	0	0	0	0	0	0	0	0	0	0	0	0	0	0	0
260081	2017-04-04	13:52:00	2	8	2	0	1	0	CHARCOAL	0	0	0	0	0	0	0		DYSPHAGIA/INGESTION OF FOREIGN BODY	90	62	97	95	36.2	14.72	0	0	0	0	0	0	0	0	0	0	0	0	0	0	0	0	0	0	0	0	0	0	0	0	0
260094	2017-04-05		2	5	2	0	1	0	FIREWOOD	0	0	0	0	1	0	0		RIGHT ARM PAIN			104	97	36	10.708	0	0	0	0	0	0	0	0	0	0	0	0	0	1	0	0	0	0	0	0	0	0	0	0	0
260095	2017-04-05	21:00:00	2	2	2	0	1	0	CHARCOAL	0	0	0	0	1	0	0		SWOLLOWED MONEY			106	96	36.8		0	0	0	0	0	0	0	0	0	0	0	0	0	0	0	0	0	0	0	0	0	0	0	0	0
260102	2017-04-05	16:00:00	2	2	2	1	1	0	CHARCOAL	1	0	0	0	1	0	0		KNEE AND ANKLE PAIN	110	70	115	95	36	13.2231	0	1	0	0	0	0	0	0	0	0	0	0	0	0	0	0	0	0	0	0	0	0	0	0	1
260111	2017-04-05	13:07:00	2	3	2	1	1	0	CHARCOAL	0	0	0	0	0	0	0		RIGHT EYE PAIN/FEVER			123	95	37.3	18.4965	0	0	0	0	0	0	0	0	0	0	0	1	0	0	0	0	0	0	0	0	0	0	0	0	0
260114	2017-04-05	12:02:00	2	8	2	1	1	1	CHARCOAL	1	0	0	0	1	0	0		BACK PAIN	100	80	80	95	37	15.9763	0	0	0	0	0	0	0	0	0	0	0	0	0	0	0	0	0	0	0	0	0	0	0	0	0
260119	2017-04-06	21:54:00	2	8	2	1	1	0	CHARCOAL	0	0	0	0	1	0	0		BURN ON FOOT WITH POTATOES	92	67	102	96	36.5	14.72	0	1	0	0	0	0	0	0	0	0	0	0	0	0	0	0	0	0	0	0	0	0	0	0	1
260173	2017-04-08	13:00:00	2	4	2	0	1	0	CHARCOAL	0	0	0	0	1	0	0		LEFT HAND WOUND			129	96	37	15.4027	0	0	0	0	0	0	0	0	0	0	0	0	0	0	0	1	0	0	0	0	0	0	0	0	0
260175	2017-04-08	14:12:00	2	6	2	0	1	0	CHARCOAL	0	1	0	0	1	0	0		FACE WOUND			123	99	36.8	14.8633	0	0	0	0	0	0	0	0	0	0	0	1	0	0	0	0	0	0	0	0	0	0	0	0	0
260192	2017-04-02	10:05:00	2	2	2	1	1	0	CHARCOAL	0	0	0	0	0	0	0		FOREIGN BODY IN RIGHT EAR			99	95	36.9	21.2191	0	0	0	0	0	0	0	0	0	0	0	1	0	0	0	0	0	0	0	0	0	0	0	0	0
260195	2017-04-09	18:06:00	2	2	2	1	1	0	CHARCOAL	0	1	0	0	1	0	0		FOREIGN BODY IN THROAT			132	99	36.6	16.2982	0	0	0	0	0	0	0	0	0	0	0	0	0	0	0	0	0	0	0	0	0	0	0	0	0
260201	2017-04-09	10:00:00	2	5	2	0	1	0	CHARCOAL	0	0	0	0	1	0	0		LEFT ELBOW PAIN	91	73	108	95	37.2	9.34579	0	0	0	0	0	0	1	0	0	0	0	0	0	0	0	0	0	0	0	0	0	0	0	0	0
260204	2017-04-09	12:02:00	2	1	2	1	1	0	CHARCOAL	1	0	0	0	1	0	0		PAIN IN THE RIGHT KNEE			167	95	39	12.6247	0	0	0	1	0	0	0	0	0	0	0	0	0	0	0	0	0	0	0	0	0	0	0	0	0
260207	2017-04-09	09:07:00	2	8	2	1	1	0	CHARCOAL	1	0	0	0	1	0	0		SLIGHT TRAUMA LEFT WRIST	86	45	70	99	35.8	13.8806	0	0	0	0	0	1	0	0	0	0	0	0	0	0	0	0	0	0	0	0	0	0	0	0	0
260240	2017-04-10	17:30:00	2	1	2	0	1	0	CHARCOAL	0	0	0	0	0	0	0		LEFT KNEE PAIN			98	96	37.8	183.105	0	0	0	1	0	0	0	0	0	0	0	0	0	0	0	0	0	0	0	0	0	0	0	0	0
260241	2017-04-10	18:32:00	2	2	2	1	1	0	FIREWOOD	0	0	0	0	0	0	0		LEFT KNEE PAIN			103	96	36.3	16.225	0	0	0	0	0	0	0	0	0	0	0	0	0	0	0	0	0	0	1	0	0	0	0	0	0
260242	2017-04-10	18:15:00	2	7	2	1	1	0	CHARCOAL	0	0	0	0	0	0	0		ANKLE PAIN	102	78	96	98	36.9	13.4372	0	0	0	0	0	0	0	0	0	0	0	0	0	0	0	0	0	0	0	1	0	0	0	0	0
260243	2017-04-10	17:53:00	2	2	2	0	1	0	FIREWOOD	0	0	1	0	0	0	0		LEFT ANKLE PAIN			99	97	36.7	19.91	0	0	0	0	0	0	0	0	0	0	0	0	0	0	0	0	0	0	0	1	0	0	0	0	0
260257	2017-04-12	11:58:00	2	1	2	0	1	0	FIREWOOD	0	0	0	0	1	0	0		RIGHT FOREARM PAIN			89	98	37.3	15.1749	0	0	0	0	0	0	0	1	0	0	0	0	0	0	0	0	0	0	0	0	0	0	0	0	0
260258	2017-04-12	12:05:00	2	2	2	1	1	0	CHARCOAL	0	0	0	0	1	0	0		FOOT SWELLING			139	98	36.7	16.3024	0	0	0	0	0	0	0	0	0	0	0	0	0	0	0	0	0	0	0	1	0	0	0	0	0
260268	2017-04-12	17:51:00	2	1	2	1	1	0	FIREWOOD	0	0	0	0	1	0	0		LEFT WRIST PAIN			163	98	37	16.7187	0	0	0	0	0	0	0	1	0	0	0	0	0	0	0	0	0	0	0	0	0	0	0	0	0
260270	2017-04-12	17:17:00	2	2	2	0	1	0	CHARCOAL	0	0	0	0	0	0	0		LEFT ELBOW PAIN			139	97	36.6	15.3633	0	0	0	0	0	0	0	0	0	0	0	0	0	0	1	0	0	0	0	0	0	0	0	0	0
260274	2017-04-12	14:30:00	2	1	2	1	1	0	FIREWOOD	0	0	0	0	1	0	0		LEFT LEG PAIN			142	97	37.5	13.7174	0	0	0	0	0	0	0	0	0	0	0	0	0	0	0	0	0	0	0	0	0	0	0	0	0
260287	2017-04-10	10:15:00	2	2	2	0	1	0	CHARCOAL+FIREWOOD	0	0	0	0	1	0	0		LEFT ARM PAIN	142	92	79	96	35.9	13.3507	0	0	0	0	0	0	0	1	0	0	0	0	0	0	0	0	0	0	0	0	0	0	0	0	0
260289	2017-04-12	18:53:00	2	4	2	0	1	0	CHARCOAL	0	0	0	0	1	0	0		LEFT ELBOW PAIN	81	60	88	99	37.2	16.7955	0	0	0	0	0	0	0	0	0	0	0	0	0	0	1	0	0	0	0	0	0	0	0	0	0
260367	2017-04-16	12:00:00	2	1	2	0	1	0	CHARCOAL	0	0	1	0	0	0	0		HOT LIQUID BURN ON LEFT HAND	99	76	154	88	34.9	14.0625	0	0	0	0	0	0	0	0	0	0	0	0	0	0	0	1	0	0	0	0	0	0	0	0	0
260369	2017-04-16	09:00:00	2	2	2	0	1	1	CHARCOAL	0	0	0	0	0	0	0		LEFT CLAVICULA PAIN	90	68	143	98	36.1	14.6838	0	0	0	0	0	0	0	0	0	0	0	0	1	0	0	0	0	0	0	0	0	0	0	0	0
260374	2017-04-16	16:40:00	2	9	2	1	1	0	CHARCOAL	0	0	0	0	0	0	0		LEFT WRIST PAIN	85	49	100	97	36.6	17.574	0	0	0	0	0	0	0	0	0	0	0	0	0	0	0	1	0	0	0	0	0	0	0	0	0
260376	2017-04-16	16:30:00	2	3	2	1	1	0	CHARCOAL	0	0	0	0	0	0	0		RIGHT ANKLE PAIN			102	87	36.8	17.5	0	1	0	0	0	0	0	0	0	0	0	0	0	0	0	0	0	0	0	0	0	0	0	0	0
260393	2017-04-16	20:57:00	2	5	2	1	1	0		0	0	1	0	0	0	0		LEFT LEG PAIN			83	98	35.4	13.975	0	0	0	0	0	0	0	0	0	0	0	0	0	0	0	0	1	0	0	0	0	0	0	0	0
260434	2017-04-19	14:00:00	2	7	2	0	1	0	CHARCOAL	0	0	0	0	0	0	0		CHEST PAIN	90	70	127	84	36.7	24.6691	0	0	0	0	0	0	0	0	0	0	0	0	0	0	0	0	0	0	1	0	0	0	0	0	0
260455	2017-04-20	10:14:00	2	3	2	0	1	0	CHARCOAL	0	0	0	0	1	0	0		FOREIGN BODY IN EAR	100	50	131	92	36.9	14.2213	0	0	0	0	0	0	0	0	0	0	0	1	0	0	0	0	0	0	0	0	0	0	0	0	0
260488	2017-04-18	14:28:00	2	3	2	1	1	0	CHARCOAL	0	0	0	0	1	0	0		FALL			78		36.7	16.3069	0	0	0	0	0	0	0	0	1	0	0	0	0	0	0	0	0	0	0	0	0	0	0	0	0
260495	2017-04-18		2	1	2	1	1	0	CHARCOAL	0	0	0	0	0	0	0		BURN			88		36.6	16.7075	0	0	0	0	0	0	0	1	0	0	0	0	0	0	0	0	0	0	0	0	0	0	0	0	0
260496	2017-04-18	09:05:00	2	2	2	1	1	0	CHARCOAL	0	0	0	0	0	0	0		FEVER/FALL			78		36.4	15.9375	0	0	0	0	0	0	0	0	0	0	0	0	0	0	1	0	0	0	0	0	0	0	0	1	0
260499	2017-04-18	18:20:00	2	2	2	0	1	0	FIREWOOD	0	0	0	0	1	0	0		FOREIGN BODY IN NOSE			93		38.1	15.873	0	0	0	0	0	0	0	0	0	0	0	1	0	0	0	0	0	0	0	0	0	0	0	0	0
260523	2017-04-19	19:56:00	2	1	2	1	1	0	CHARCOAL	0	0	0	0	0	0	0		BURN	120	90	176	99	36.4	20.2395	0	1	0	0	0	0	0	0	0	0	0	0	0	0	0	0	0	0	0	0	0	0	0	0	0
260524	2017-04-19	21:52:00	2	3	2	0	1	0	CHARCOAL	0	0	0	0	1	0	0		INGESTION OF DETERGENT	120	60	127	99	37	15.0047	0	0	0	0	0	0	0	0	0	0	0	0	0	0	0	0	0	0	0	0	0	0	0	0	0
260528	2017-04-19	20:22:00	2	8	2	0	1	0	FIREWOOD	0	0	0	0	0	0	0		LEFT LEG PAIN	99	85	100	96	37.2	9.39809	0	0	0	0	0	0	0	0	0	0	0	0	0	0	0	0	0	0	1	0	0	0	0	0	0
260540	2017-04-24	08:59:00	2	9	2	1	1	0	CHARCOAL+FIREWOOD	0	0	0	0	0	0	0		TRAFFIC ACCIDENT	120	80	115	22	36.7	14.7929	0	0	0	0	0	1	0	0	0	0	0	0	0	0	0	0	0	0	0	0	0	0	0	0	0
260551	2017-04-24	12:30:00	2	4	2	1	1	0	CHARCOAL	0	0	0	0	0	0	0		FALL	110	90	153	95	38.1	13.8166	0	0	0	0	0	0	0	0	1	0	0	0	0	0	0	0	0	0	0	0	0	0	0	0	0
260579	2017-04-25		2	2	2	1	1	0	FIREWOOD	0	0	0	0	0	0	0		FOREIGN BODY IN ESOPHAGUS	115	75	151	95	36.8		0	0	0	0	0	0	0	0	0	0	0	0	0	0	0	0	0	0	0	0	0	0	0	0	0
260607	2017-04-22	14:24:00	2	2	2	1	1	0	CHARCOAL	0	0	0	0	0	0	0		COAL IN NASAL FOSSA	110	60	95	89	34.5	13.6196	0	0	0	0	0	0	0	0	0	0	0	1	0	0	0	0	0	0	0	0	0	0	0	0	0
260610	2017-04-22	12:52:00	2	3	2	1	1	0	CHARCOAL	0	0	0	0	0	0	0		ARM PAIN	99	60	102	99	36.7	15.2249	0	0	0	0	0	0	1	0	0	0	0	0	0	0	0	0	0	0	0	0	0	0	0	0	0
260628	2017-04-27	18:10:00	2	9	2	1	1	0	CHARCOAL	0	0	0	0	0	0	0		HEADACHE	90	70	117	96	37	15.3633	0	0	0	0	0	0	0	0	0	0	0	0	0	0	1	0	0	0	0	0	0	0	0	0	0
260661	2017-04-22	11:00:00	2	6	2	0	1	0	CHARCOAL	0	0	0	0	1	0	0		WOUND	121	62	88	97	36.6	19.1051	0	0	0	0	0	0	0	0	0	0	0	0	0	0	0	1	0	0	0	0	0	0	0	0	0
260682	2017-04-26	14:00:00	2	5	2	1	1	0	CHARCOAL	0	0	0	0	1	0	0		FALL			130		36.4	18.7955	0	0	0	0	0	0	0	1	0	0	0	0	0	0	0	0	0	0	0	0	0	0	0	0	0
260683	2017-04-26	14:00:00	2	3	2	1	1	0	CHARCOAL	0	0	0	0	0	0	0		FALL			86		36	14.9293	0	0	0	0	0	0	1	0	0	0	0	0	0	0	0	0	0	0	0	0	0	0	0	0	0
260712	2017-04-27		2	7	2	1	1	0	CHARCOAL+FIREWOOD	0	0	0	0	1	0	0		FALL	98	63	115	99	36.7	13.0809	0	0	0	0	0	0	1	0	0	0	0	0	0	0	0	0	0	0	0	0	0	0	0	0	0
260713	2017-04-28	22:11:00	2	5	2	0	1	0	CHARCOAL	0	0	0	0	1	0	0		LEFT ELBOW PAIN AND SWELLING	80	60	124	99	35.6	13.6106	0	0	0	0	0	0	0	0	0	0	0	0	0	0	1	0	0	0	0	0	0	0	0	0	0
260718	2017-04-30	19:00:00	2	5	2	0	1	0	CHARCOAL+FIREWOOD	0	0	0	0	0	0	0		FALL	100	70	130	99	36.5	14.876	0	0	0	0	0	0	0	1	0	0	0	0	0	0	0	0	0	0	0	0	0	0	0	0	0
260720	2017-04-30	11:30:00	2	4	2	1	1	0	CHARCOAL	0	0	0	0	0	0	0		FALL	100	70	70	91	36.6	15.5	0	0	0	0	0	0	0	0	0	0	0	0	0	0	0	1	0	0	0	0	0	0	0	0	0
260730	2017-04-24		2	7	2	1	1	0	CHARCOAL	0	0	0	0	0	0	0		FALL	100	70	100	84	36	12.784	0	0	0	0	0	0	0	0	0	0	0	0	0	1	0	0	0	0	0	0	0	0	0	0	0
918213	2017-10-01	08:02:00	2	3	2	1	1	0	CHARCOAL	0	1	0	1	0	0	0		FALL (RIGHT KNEE TRAUMA)					35.9	17.1713	0	0	0	0	0	0	0	0	0	0	0	0	0	0	0	0	0	1	0	0	0	0	0	0	0
918217	2017-10-01	11:53:00	2	5	2	0	1	1	CHARCOAL	1	0	0	0	1	0	0		WRIST AND ELBOW TRAUMA	120	80			37.1	17.6753	0	0	0	0	0	1	1	0	0	0	0	0	0	0	0	0	0	0	0	0	0	0	0	0	0
918221	2017-10-01	18:30:00	2	2	2	0	1	0	CHARCOAL	0	1	0	0	1	0	0		FALL (LEFT ELBOW TRAUMA)	110	80			37.4	16.0751	0	0	0	0	0	0	1	0	0	0	0	0	0	0	0	0	0	0	0	0	0	0	0	0	0
918228	2017-10-02	14:32:00	2	7	2	1	1		CHARCOAL				0	0	0	0		ARM PAIN	111	70	86	89	36.8	14.4218	0	0	0	0	0	0	0	0	0	0	0	0	0	1	0	0	0	0	0	0	0	0	0	0	0
918231	2017-10-02	15:54:00	2	1	2	0	1	0	CHARCOAL	0	0	0	0	0	0	0		ARM PAIN	102	70	80	72	37.4	13.6889	0	0	0	0	0	0	1	0	0	0	0	0	0	0	0	0	0	0	0	0	0	0	0	0	0
918232	2017-10-02	11:46:00	2	3	2	0	1	0	CHARCOAL	0	0	0	0	0	0	0		FOOT PAIN	101	62	69	82	36.6	16.7924	0	1	0	0	0	0	0	0	0	0	0	0	0	0	0	0	0	0	0	0	0	0	0	0	0
918276	2017-10-03	16:52:00	2	9	2	1	1		CHARCOAL+FIREWOOD				0	0	0	0		FALL	120	100	143	96	23.7		0	0	0	0	0	0	0	0	0	0	0	0	0	1	0	0	0	0	0	0	0	0	0	0	0
918278	2017-10-03	19:26:00	2	6	2	1	1	0	CHARCOAL	1	0	0	0	1	0	0		DIFFICULTY SWALLOWING	90	60	139	99	36.9	13.7741	0	0	0	0	0	0	0	0	0	0	0	0	0	0	0	0	0	0	0	0	0	0	0	0	0
9182112	2017-10-04	11:57:00	2	5	2	1	1		FIREWOOD				0	0	0	0		SHOULDER PAIN	100	70	135	97	38.5	14.3086	0	0	0	0	0	0	0	0	0	0	0	0	1	0	0	0	0	0	0	0	0	0	0	0	0
9182116	2017-10-04	17:02:00	2	7	2	0	1		CHARCOAL				0	1	0	0		ARM PAIN	100	70	125	98	37.5	13.9887	0	0	0	0	0	0	0	0	0	0	0	0	0	0	1	0	0	0	0	0	0	0	0	0	0
9182118	2017-10-04	19:39:00	2	9	2	1	1	0	CHARCOAL	1	0	0	0	1	0	0		RIGHT KNEE PAIN	90	70	100	95	36.7	20.5896	0	0	0	1	0	0	0	0	0	0	0	0	0	0	0	0	0	0	0	0	0	0	0	0	0
9182119	2017-10-04	20:01:00	2	4	2	0	4		CHARCOAL+GAS				0	1	0	0		RIGHT HEEL PAIN	111	90	121	100	36.4	15.1299	0	1	0	0	0	0	0	0	0	0	0	0	0	0	0	0	0	0	0	0	0	0	0	0	1
9182130	2017-10-05	10:56:00	2	3	2	1	1	0	CHARCOAL	1	0	0	0	1	0	0		RIGHT FOOT PAIN AND SWELLING	115	90	115	96	36.6	14.6668	0	1	0	0	0	0	0	0	0	0	0	0	0	0	0	0	0	0	0	0	0	0	0	0	0
9182177	2017-10-06	17:04:00	2	7	2	1	1	1	CHARCOAL	1	1	1	0	1	0	0		LEFT WRIST TRAUMA	120	60	112	99	37.6	15.0376	0	0	0	0	0	0	0	0	0	0	0	0	0	0	0	1	0	0	0	0	0	0	0	0	0
9182193	2017-10-07	06:37:00	2	2	2	0	1	0	CHARCOAL	1	0	0	0	1	0	0		RIGHT KNEE WOUND	110	80	120	99	35.9	15.1496	0	0	0	0	0	1	0	0	0	0	0	1	0	0	0	0	0	0	0	0	0	0	0	0	0
9182205	2017-10-07	08:01:00	2	8	2	0	1		CHARCOAL				0	0	0	0		FOREARM PAIN	120	80	120	99	36.7	16.2245	0	0	0	0	0	0	0	0	0	0	0	0	0	0	1	0	0	0	0	0	0	0	0	0	0
9182220	2017-10-07	19:58:00	2	3	2	1	1		CHARCOAL				0	1	0	0		ELBOW PAIN	120	80	113	100	37	16.276	0	0	0	0	0	0	0	0	0	0	0	0	0	0	1	0	0	0	0	0	0	0	0	0	0
9182224	2017-10-08	15:53:00	2	5	2	0	1	0	FIREWOOD	0	1	0	0	1	0	0		CASUAL FALL	100	60	123	95	37.6	14.8964	0	0	0	0	0	0	0	0	0	0	0	0	0	0	0	0	0	0	0	0	0	0	0	0	0
9182238	2017-10-08	10:57:00	2	1	2	0	1	1	CHARCOAL	1	1	0	0	1	0	0		LEFT ELBOW TRAUMA			126	97	36.7	19.0675	0	0	0	0	0	0	0	0	0	0	0	0	0	0	1	0	0	0	0	0	0	0	0	0	0
9182247	2017-10-08	14:44:00	2	9	2	0	1	1	CHARCOAL	1	0	1	0	1	0	0		LEFT FOOT WOUND	90	60	121	97	36.2	15.4565	0	0	0	0	0	0	0	0	0	0	0	0	0	0	0	0	0	0	0	1	0	0	0	0	0
9182252	2017-10-08	17:52:00	2	2	2	0	1	0	CHARCOAL	1	0	0	1	0	0	0		FOREIGN BODY IN THROAT	90	60	146	99	36.4	15.2219	0	0	0	0	0	0	0	0	0	0	0	0	0	0	0	0	0	0	0	0	0	0	0	0	0
9182255	2017-10-08	20:38:00	2	8	2	0	1	0	CHARCOAL	0	1	0	0	1	0	0		TESTICULAR LACERATION (SCROTUM)	100	55	105	96	36.6	14.5125	0	0	0	0	0	0	0	0	0	0	0	0	0	0	0	0	0	0	0	0	0	0	0	1	0
9182293	2017-10-09	17:40:00	2	3	2	0	1		CHARCOAL				0	0	0	0		RIGHT SHOULDER PAIN			104	96	36	16.7872	0	0	0	0	0	0	0	0	1	0	0	0	0	0	0	0	0	0	0	0	0	0	0	0	0
9182294	2017-10-09	17:48:00	2	4	2	1	1		FIREWOOD				0	0	0	0		LEFT LEG PAIN			140	90	37.3	13.4669	0	0	0	0	0	0	0	0	0	0	0	0	0	0	0	0	0	0	0	1	0	0	0	0	0
9182319	2017-10-10	09:56:00	2	2	2	1	1		CHARCOAL				0	0	0	0		FALL			115	98	36	16	0	0	0	0	0	0	0	0	0	0	0	0	0	0	0	0	0	0	0	1	0	0	0	0	0
9182320	2017-10-10	10:17:00	2	3	2	0	1		CHARCOAL				0	0	0	0		FALL	120	90	153	97	36.6	16.7649	0	0	0	0	0	0	0	0	0	0	0	0	0	0	0	0	0	0	0	0	0	0	0	0	0
9182324	2017-10-10	12:09:00	2	6	2	1	1		CHARCOAL				0	0	0	0		FALL			135	98	37.1	12.9939	0	1	0	0	0	0	0	0	0	0	0	0	0	0	0	0	0	0	0	0	0	0	0	0	0
9182330	2017-10-10	17:33:00	2	1	2	1	1		CHARCOAL				0	0	0	0		FALL			159	83	36.6	17.5278	0	0	0	0	0	0	0	0	0	0	0	0	0	0	0	0	0	0	0	1	0	0	0	0	0
9182336	2017-10-10	20:13:00	2	3	2	0	1	1	CHARCOAL	0	0	0	0	1	0	0		WOUND	109	81	72	89	36.9	15.1433	0	0	0	0	0	0	0	0	0	0	0	0	0	0	0	0	0	0	0	0	0	0	0	1	0
9182343	2017-10-11	08:26:00	2	6	2	1	1		CHARCOAL				0	0	0	0		LEFT FOOT PAIN POST FREE FALL	110	80	114	98	36.4	16.2324	0	0	0	0	0	0	0	0	0	0	0	0	0	0	0	0	0	0	0	1	0	0	0	0	0
9182361	2017-10-11	12:00:00	2	9	2	1	1		CHARCOAL				0	1	0	0		LEFT FOREARM PAIN	100	80	119	100	36.9	16.9597	0	0	0	0	0	0	0	0	0	0	0	0	0	0	0	1	0	0	0	0	0	0	0	0	0
9182370	2017-10-11	16:59:00	2	8	2	1	1						0	1	0	0		LEFT KNEE PAIN	100	90	129	100	36.8		0	0	0	0	0	0	0	0	0	0	0	0	0	0	0	0	0	1	0	0	0	0	0	0	0
9182373	2017-10-11	18:47:00	2	4	2	0	1		CHARCOAL				0	1	0	0		HEADACHE POST TRAUMA			109	100	36.9	13.7241	0	0	0	0	0	0	0	0	0	0	0	1	0	0	0	0	0	0	0	0	0	0	0	0	0
9182386	2017-10-12	09:22:00	2	8	2	0	1		FIREWOOD				0	1	0	0		RIGHT ELBOW TRAUMA	80	60	129	99	37.1	15.5992	0	0	0	0	0	0	0	0	0	0	0	0	0	0	1	0	0	0	0	0	0	0	0	0	0
9182393	2017-10-12	11:19:00	2	8	2	0	1		CHARCOAL				0	0	0	0		FALL	80	60	100	82	36.7	13.9204	0	0	0	0	0	0	1	0	0	0	0	0	0	0	0	0	0	0	0	0	0	0	0	0	0
9182421	2017-10-13	08:59:00	2	4	2	1	1		CHARCOAL				0	0	0	0		FOOT SWELLING	100	60	107	97	36.8	15.6107	0	0	0	0	0	0	0	0	0	0	0	0	0	0	0	1	0	0	0	1	0	0	0	0	0
9182434	2017-10-13	12:15:00	2	3	2	0	1		CHARCOAL				0	0	0	0		FALL	120	50	122	94	36.4	16.0706	0	0	0	1	0	0	0	0	0	0	0	0	0	0	0	0	0	0	0	0	0	0	0	0	0
9182443	2017-10-13	16:50:00	2	1	2	1	1		CHARCOAL				0	0	0	0		FALL	120	70	104	94	36.5		0	0	0	0	0	0	0	0	0	0	0	0	1	0	0	0	0	0	0	0	0	0	0	0	0
9182460	2017-10-14	09:40:00	2	5	2	0	1	0	CHARCOAL	1	0	0	0	1	0	0		FALL	110	60	123	99	36	13.3135	0	0	0	0	0	0	0	0	0	0	0	0	0	0	0	1	0	0	0	1	0	0	0	0	0
9182466	2017-10-14	12:04:00	2	4	2	0	1	0	CHARCOAL	0	1	0	0	0	0	0		FALL	100	70	123	99	36	15.625	0	0	0	0	0	0	0	0	0	0	0	0	0	0	1	0	0	0	0	0	0	0	0	0	0
9182491	2017-10-15	10:17:00	2	4	2	0	1	0	CHARCOAL	1	0	0	0	1	0	0		RIGHT ELBOW PAIN	110	80	120		36.6	12.9113	0	0	0	0	0	0	1	0	0	0	0	0	0	0	0	0	0	0	0	0	0	0	0	0	0
9182493	2017-10-15	10:49:00	2	1	2	0	1	0	CHARCOAL	1	1	0	0	0	0	0		LEFT FOREARM BURN	110	80	124		35.9	19.91	0	0	0	0	0	0	0	1	0	0	0	0	0	0	0	0	0	0	0	0	0	0	0	0	0
9182499	2017-10-15	13:48:00	2	6	2	0	1		FIREWOOD				1	0	0	0		RIGHT THIGH TRAUMA	140	100	121		37.4	15.2066	0	0	0	0	1	0	0	0	0	0	0	0	0	0	0	0	0	0	0	0	0	0	0	0	0
9182512	2017-10-15	16:43:00	2	8	2	1	1	0	CHARCOAL	1	1	0	0	1	0	0		WRIST TRAUMA	120	80	123		37.4	18.0473	0	0	0	0	0	1	0	0	0	0	0	0	0	0	0	1	0	0	0	0	0	0	0	0	0
9182543	2017-10-16	08:32:00	2	6	2	1	1		CHARCOAL				0	0	0	0		FOREIGN BODY RIGHT EYE	110	50			36.2	14.3086	0	0	0	0	0	0	0	0	0	0	0	1	0	0	0	0	0	0	0	0	0	0	0	0	0
9182550	2017-10-16	10:07:00	2	4	2	0	1		CHARCOAL+FIREWOOD				0	0	0	0		RIGHT SHOULDER PAIN	95	70			36.2	16.4649	0	0	0	0	0	0	0	0	1	0	0	0	0	0	0	0	0	0	0	0	0	0	0	0	0
9182556	2017-10-16	11:17:00	2	8	2	0	1		CHARCOAL				0	0	0	0		LEFT FOOT PAIN	102	60			36.4	14.9762	0	0	0	0	0	0	0	0	0	0	0	0	0	0	0	0	0	0	1	0	0	0	0	0	0
9182567	2017-10-16	13:39:00	2	5	2	0	1		CHARCOAL+GAS				0	0	0	0		LEG WOUND	89	62				15.625	0	0	0	0	0	0	0	0	0	0	0	0	0	0	0	1	0	0	0	0	0	0	0	0	0
9182570	2017-10-16	15:30:00	2	1	2	1	1	1	CHARCOAL+ELECTRICITY	1	0	0	0	0	0	0		ALLERGY	110	60	122	81	37.2	13.5208	0	0	0	0	0	0	0	0	0	0	0	0	0	0	0	0	0	0	0	0	0	0	0	0	0
9182572	2017-10-16	16:26:00	2	3	2	1	1		CHARCOAL				0	0	0	0		DENTAL PAIN	95	60			37.3	15.0825	0	0	0	0	0	0	0	0	0	0	0	1	0	0	0	0	0	0	0	0	0	0	0	0	0
9182576	2017-10-16	17:11:00	2	4	2	0	1		CHARCOAL				0	0	0	0		FOREIGN BODY IN LEFT NASAL FOSSA	102	60			36.8	17.2049	0	0	0	0	0	0	0	0	0	0	0	1	0	0	0	0	0	0	0	0	0	0	0	0	0
9182594	2017-10-17	06:31:00	2	1	2	1	1		CHARCOAL				0	0	0	0		TONGUE WOUND	96	52	82	78	36.9	18.0789	0	0	0	0	0	0	0	0	0	0	0	1	0	0	0	0	0	0	0	0	0	0	0	0	0
9182607	2017-10-17	09:36:00	2	7	2	0	1		FIREWOOD				0	0	0	0		FALL	110	90	110		36.7	8.00183	0	0	0	0	0	0	0	0	1	0	0	0	0	0	0	0	0	0	0	0	0	0	0	0	0
9182608	2017-10-17	09:43:00	2	7	2	1	1		CHARCOAL+FIREWOOD				0	0	0	0		FALL	120	90	130		37.5	14.5482	0	0	0	0	0	0	1	0	0	0	0	0	0	0	0	0	0	0	0	0	0	0	0	0	0
9182613	2017-10-17	10:06:00	2	1	2	1	1		CHARCOAL+FIREWOOD				0	0	0	0		BURNS	110	90	110		36.5	16.5895	0	0	0	0	0	0	0	0	0	0	0	0	0	0	0	0	0	0	0	0	0	0	0	0	0
9182631	2017-10-17	14:54:00	2	8	2	1	1		CHARCOAL				0	0	0	0		FALL	120	80	110		36.9	14.4379	0	0	0	0	0	0	0	0	0	0	0	0	0	0	0	0	0	0	0	0	0	0	0	1	0
9182654	2017-10-18	08:02:00	2	7	2	0	1	0	CHARCOAL	1	0	0	0	1	0	0		CHEST PAIN/LUMBAR REGION CONTUSION	120	60	93		36.2	13.696	0	0	0	0	0	0	0	0	0	0	0	0	0	0	0	0	0	0	0	0	0	0	0	0	0
9182694	2017-10-18	14:03:00	2	7	2	0	1		CHARCOAL				0	0	0	0		FOREIGN BODY IN RIGHT NOSTRIL	130	99	115	99	36.2	16.4121	0	0	0	0	0	0	0	0	0	0	0	1	0	0	0	0	0	0	0	0	0	0	0	0	0
9182696	2017-10-18	15:05:00	2	3	2	0	1		CHARCOAL				0	1	0	0		NECK PAIN	89	50	92	99	36.3	13.719	0	0	0	0	0	0	0	0	0	0	1	0	0	0	0	0	0	0	0	0	0	0	0	0	0
9182701	2017-10-18	16:51:00	2	1	2	0	1		CHARCOAL				0	0	0	0		PEN LID IN LEFT NOSTRIL	139	89	115	99	36.6	18.2823	0	0	0	0	0	0	0	0	0	0	0	1	0	0	0	0	0	0	0	0	0	0	0	0	0
9182709	2017-10-18	21:25:00	2	3	2	0	1		CHARCOAL				0	1	0	0		PAIN IN THE LEFT ELBOW	100	70	129	100	36.2	17.1746	0	0	0	0	0	0	0	0	0	0	0	0	0	0	1	0	0	0	0	0	0	0	0	0	0
9182719	2017-10-19	06:50:00	2	4	2	1	1						0	0	0	0		RIGHT ELBOW PAIN	100	75	122	97	37.5	11.85	0	0	0	0	0	0	1	0	0	0	0	0	0	0	0	0	0	0	0	0	0	0	0	0	0
9182739	2017-10-19	11:12:00	2	4	2	1	1		CHARCOAL				0	1	0	0		WRIST TRAUMA	100	90	114	93	36.6	15.2585	0	0	0	0	0	0	1	0	0	0	0	0	0	0	0	1	0	0	0	0	0	0	0	0	0
9182742	2017-10-19	12:34:00	2	3	2	0	1	0	CHARCOAL	1	0	0	0	1	0	0		FOREIGN BODY IN LEFT NOSE			145	99	36.7	17.1605	0	0	0	0	0	0	0	0	0	0	0	1	0	0	0	0	0	0	0	0	0	0	0	0	0
9182745	2017-10-19	13:32:00	2	7	2	0	1						0	0	0	0		LEG AND GENITAL BURN	100	80	137	85	37.6	18.0124	0	0	0	0	0	0	0	0	0	0	0	0	0	0	0	0	0	0	0	0	0	0	0	0	0
9182747	2017-10-19	14:27:00	2	5	2	1	1		CHARCOAL				0	0	0	0		LEFT ELBOW TRAUMA	110	90	104	96	36.6	15.8356	0	0	0	0	0	0	0	0	0	0	0	0	0	0	1	0	0	0	0	0	0	0	0	0	0
9182750	2017-10-19	16:02:00	2	1	2	0	1		CHARCOAL				0	1	0	0		LEFT FOOT WOUND			95	84	36.7	14.2222	0	0	0	0	0	0	0	0	0	0	0	0	0	0	0	0	0	0	0	1	0	0	0	0	0
9182780	2017-10-20	10:18:00	2	6	2	0	1	0	CHARCOAL	1	0	0	0	1	0	0		ELBOW PAIN	100	75	105	99	37.1	15.3238	0	0	0	0	0	0	1	0	0	0	0	0	0	0	0	0	0	0	0	0	0	0	0	0	0
9182799	2017-10-20	18:20:00	2	1	2	0	1		CHARCOAL				0	1	0	0		FOREIGN BODY IN NOSTRIL	100	80	120	100	36.9	17.8814	0	0	0	0	0	0	0	0	0	0	0	1	0	0	0	0	0	0	0	0	0	0	0	0	0
9182802	2017-10-20	19:56:00	2	7	2	1	1		CHARCOAL				0	0	0	0		THIGH AND GENITAL WOUNDS FROM BURN	100	70	142	99	36.2	13.8889	0	0	0	0	1	0	0	0	0	0	0	0	0	0	0	0	0	1	0	0	0	0	0	1	0
9182818	2017-10-21	08:38:00	2	7	2	1	1		FIREWOOD				0	1	0	0		LEFT LEG WOUND	160	70	124	99	36.4	20	1	0	0	0	0	0	0	0	0	0	0	0	0	0	0	0	0	0	0	1	0	0	0	0	1
9182824	2017-10-21	10:05:00	2	3	2	1	1		FIREWOOD				0	1	0	0		FOREIGN BODY IN NOSTRIL	100	80	123	99	36.3	15.0208	1	0	0	0	0	0	0	0	0	0	0	1	0	0	0	0	0	0	0	0	0	0	0	0	0
9182835	2017-10-21	12:34:00	2	3	2	1	1		CHARCOAL				1	0	0	0		STONE IN THE RIGHT NOSTRIL	100	80	121	99	36.5	13.8166	1	0	0	0	0	0	0	0	0	0	0	0	0	0	0	0	0	0	0	0	0	0	0	0	0
9182848	2017-10-21	15:39:00	2	4	2	0	1		CHARCOAL				0	0	0	0		RIGHT SHOULDER PAIN	110	80	125	99	37.5	14.5155	1	0	0	0	0	0	0	0	1	0	0	0	0	0	0	0	0	0	0	0	0	0	0	0	0
9182851	2017-10-21	16:13:00	2	3	2	0	1		CHARCOAL				0	0	0	0		LEFT ARM PAIN	100	80	125	99	35.9	16.5147	1	0	0	0	0	0	0	0	0	0	0	0	0	0	1	0	0	0	0	0	0	0	0	0	0
9182854	2017-10-21	16:44:00	2	3	2	0	1		CHARCOAL				0	0	0	0		LEFT ELBOW PAIN	100	80	121	97	36.9	12.986	0	0	0	0	0	0	0	0	0	0	0	0	0	0	1	0	0	0	0	0	0	0	0	0	0
9182863	2017-10-21	18:27:00	2	5	2	1	1		CHARCOAL				0	0	0	0		THUMB WOUND	120	80	125	99	37.1	14.2399	1	0	0	0	0	0	0	0	0	0	0	0	0	0	0	1	0	0	0	0	0	0	0	0	0
9182878	2017-10-22	07:48:00	2	7	2	0	1		CHARCOAL				0	1	0	0		EIGHT ELBOW TRAUMA AND PAIN	100	60	96	87	35.6	13.5678	0	0	0	0	0	0	1	0	0	0	0	0	0	0	0	0	0	0	0	0	0	0	0	0	0
9182880	2017-10-22	07:55:00	2	4	2	0	1	0	CHARCOAL	1	1	0	0	1	0	0		RIGHT ELBOW TRAUMA	90	60	116	97	36.6	16.2037	0	0	0	0	0	0	1	0	0	0	0	0	0	0	0	0	0	0	0	0	0	0	0	0	0
9182892	2017-10-22	12:08:00	2	4	2	1	1		CHARCOAL				0	1	0	0		ANKLE TRAUMA	90	60	101	99	36	19.2745	0	1	0	0	0	0	0	0	0	0	0	0	0	0	0	0	0	0	0	0	0	0	0	0	0
9182894	2017-10-22	12:24:00	2	1	2	1	1	0	CHARCOAL	0	0	0	0	1	0	0		LEFT ELBOW TRAUMA	90	60	118	97	36.5	20.3125	0	0	0	0	0	0	0	0	0	0	0	0	0	0	1	1	0	0	0	0	0	0	0	0	0
9182904	2017-10-22	15:02:00	2	1	2	1	1	0	CHARCOAL	1	0	0	0	1	0	0		OBJECT IN NOSE			124	96	35.6	13.5042	0	0	0	0	0	0	0	0	0	0	0	1	0	0	0	0	0	0	0	0	0	0	0	0	0
9182920	2017-10-22	19:35:00	2	4	2	0	1		CHARCOAL				0	1	0	0		LEFT WRIST PAIN	100	60	116	98	36.8	103.222	0	0	0	0	0	0	0	0	0	0	0	0	0	0	0	1	0	0	0	0	0	0	0	0	0
9182932	2017-10-22	22:44:00	2	8	2	0	1		FIREWOOD				0	1	0	0		FAINT POST TRAMPLING	90	60	136	93	37	13.94	0	0	0	0	0	0	0	0	0	0	0	1	0	0	0	0	0	0	0	0	0	0	0	0	0
9182933	2017-10-23	04:53:00	2	1	2	1	1		CHARCOAL				0	0	0	0		CRYING WHEN MOBILIZING RIGHT LEG/FEVER	90	40	96	90	38.3	29.6556	0	0	0	0	1	0	0	0	0	0	0	0	0	0	0	0	0	0	0	0	0	0	0	0	0
9182962	2017-10-23	11:30:00	2	5	2	1	1		CHARCOAL+FIREWOOD				0	0	0	0		RIGHT ARM PAIN	100	60	154	98	36.7	14.4731	0	0	0	0	0	0	1	0	0	0	0	0	0	0	0	0	0	0	0	0	0	0	0	0	0
9182964	2017-10-23	11:44:00	2	9	2	1	1		CHARCOAL				0	0	0	0		ARM PAIN	110	80	100	95	36.2	14.9382	0	0	0	0	0	1	0	0	0	0	0	0	0	0	0	0	0	0	0	0	0	0	0	0	0
9182968	2017-10-23	13:35:00	2	4	2	0	1		CHARCOAL+FIREWOOD				0	0	0	0		RIGHT ARM PAIN	90	60	103	94	36	15.4102	0	0	0	0	0	1	0	0	0	0	0	0	0	0	0	0	0	0	0	0	0	0	0	0	0
9182971	2017-10-23	14:38:00	2	3	2	0	1		FIREWOOD				0	0	0	0		FOREARM PAIN	120	40	146	100	36.4	10.4512	0	0	0	0	0	0	1	0	0	0	0	0	0	0	0	0	0	0	0	0	0	0	0	0	0
9182973	2017-10-23	15:18:00	2	6	2	1	1		CHARCOAL				0	0	0	0		LEFT ARM PAIN/LEFT ELBOW PAIN	100	80	101	98	36	14.3121	0	0	0	0	0	0	0	0	0	0	0	0	0	0	1	1	0	0	0	0	0	0	0	0	0
9182980	2017-10-23	18:06:00	2	5	2	1	1		CHARCOAL				0	0	0	0		RIGHT ARM PAIN	100	70	122	99	36.6	14.3214	0	0	0	0	0	1	0	0	0	0	0	0	0	0	0	0	0	0	0	0	0	0	0	0	0
9182985	2017-10-23	20:07:00	2	6	2	0	1		CHARCOAL				0	0	0	0		HAND WOUND			100	99	36	16.8209	0	0	0	0	0	0	0	0	0	0	0	0	0	0	0	1	0	0	0	0	0	0	0	0	0
9182986	2017-10-23	20:32:00	2	9	2	0	1		CHARCOAL				0	0	0	0		SWALLOWED 10 METICAL COIN	110	60	100	99	35.9	16.0552	0	0	0	0	0	0	0	0	0	0	0	0	0	0	0	0	0	0	0	0	1	0	1	0	0
91821007	2017-10-24	09:30:00	2	3	2	0	1		FIREWOOD				0	0	0	0		FALL			100	98	36.2	18.8217	0	0	0	0	0	0	1	0	0	0	0	0	0	0	0	0	0	0	0	0	0	0	0	0	0
91821013	2017-10-24	10:39:00	2	4	2	0	1		CHARCOAL				0	0	0	0		FALL			100	98	36.4	5.71559	0	0	0	0	0	0	0	0	0	0	0	0	0	1	0	0	0	0	0	0	0	0	0	0	0
91821021	2017-10-24	11:59:00	2	1	2	0	1		FIREWOOD				0	0	0	0		PUS DISCHARGE FROM EAR/FOREIGN BODY			159	99	36.3	16.1833	0	0	0	0	0	0	0	0	0	0	0	1	0	0	0	0	0	0	0	0	0	0	0	0	0
91821032	2017-10-24	16:34:00	2	3	2	0	1		CHARCOAL+ELECTRICITY				0	0	0	0		ITCHING	110	90	110	99	36.5	12.1884	0	0	0	0	0	0	0	0	0	1	0	0	0	0	0	0	0	0	0	0	0	0	0	0	0
91821076	2017-10-25	11:54:00	2	8	2	0	1		CHARCOAL				0	0	0	0		FALL			110	90	36.7	14.7564	0	0	0	0	0	0	1	0	0	0	0	0	0	0	0	0	0	0	0	0	0	0	0	0	0
91821097	2017-10-26	01:26:00	2	4	2	1	1		CHARCOAL				0	0	0	0		FALL	149	70	121	98	37.9	13.3849	0	0	0	0	0	1	0	0	0	0	0	0	0	0	0	0	0	0	0	0	0	0	0	0	0
91821109	2017-10-26	10:12:00	2	2	2	0	1		CHARCOAL				0	0	0	0		ITCHING	162	96	162	96	36.9	15.5165	0	0	0	0	0	0	0	0	0	0	0	0	0	0	0	0	0	0	0	0	0	0	0	0	0
91821115	2017-10-26	11:25:00	2	7	2	1	1		CHARCOAL				0	0	0	0		FALL			137	98	36.9	14.3667	0	0	0	0	0	0	0	0	0	0	0	1	0	0	0	0	0	0	0	0	0	0	0	0	0
91821129	2017-10-26	18:07:00	2	5	2	0	1		CHARCOAL				0	0	0	0		FALL	140	99	121	98	36.2	13.4669	0	0	1	0	0	0	0	0	0	0	0	0	0	0	0	0	0	0	0	0	0	0	0	0	0
91821132	2017-10-26	20:41:00	2	3	2	0	1		CHARCOAL				0	0	0	0		WRIST PAIN POST TRAUMA	99	70	113	90	34.9	15.5165	0	0	0	0	0	1	0	0	0	0	0	0	0	0	0	0	0	0	0	0	0	0	0	0	0
91821161	2017-10-27	09:44:00	2	7	2	0	1	0	CHARCOAL	1	1	1	0	1	0	0		LEFT ELBOW TRAUMA	80	60	120	99	37.2	14.0617	0	0	0	0	0	0	0	0	0	0	0	0	0	0	1	0	0	0	0	0	0	0	0	0	0
91821162	2017-10-27	09:59:00	2	9	2	0	1		CHARCOAL				0	1	0	0		LEFT ANKLE TRAUMA	90	80	99	98	36.4	16.0247	0	0	0	0	0	0	0	0	0	0	0	0	0	0	0	0	0	0	0	1	0	0	0	0	0
91821168	2017-10-27	12:11:00	2	6	2	0	1	0	CHARCOAL	1	1	0	0	1	0	0		LEFT ELBOW TRAUMA	110	70	128	99	37	14.6102	0	0	0	0	0	0	0	0	0	0	0	0	0	0	1	0	0	0	0	0	0	0	0	0	0
91821169	2017-10-27	12:21:00	2	6	2	1	1		CHARCOAL				0	0	0	0		RIGHT FOREARM TRAUMA	90	60	122	99	36.2	13.9076	0	0	0	0	0	0	0	0	0	0	0	0	0	0	0	1	0	0	0	0	0	0	0	0	0
91821174	2017-10-27	13:27:00	2	6	2	1	1		CHARCOAL				1	0	0	0		COBRA BITE ON FOOT	110	80	112	99	37	13.2144	0	0	0	0	0	0	0	0	0	0	0	0	0	0	0	0	0	0	0	1	0	0	0	0	0
91821179	2017-10-27	15:17:00	2	6	2	0	1		CHARCOAL				0	1	0	0		TRAUMA	90	60	95	99	36.7	14.2911	0	0	0	0	0	0	0	0	0	0	0	0	0	0	0	1	0	0	0	0	0	0	0	0	0
91821201	2017-10-28	08:09:00	2	1	2	0	1	0	CHARCOAL	1	0	0	0	0	0	0		TRAUMA	90	50	139	99	36.1	17.1875	0	0	0	0	0	0	0	0	0	0	0	0	0	0	1	0	0	0	0	0	0	0	0	0	0
91821222	2017-10-28	14:58:00	2	5	2	0	1		CHARCOAL				0	0	0	0		LEFT ELBOW TRAUMA	110	60	123	99	36.6	18.5491	0	0	0	1	0	0	0	0	0	1	0	0	0	0	1	0	0	0	0	0	0	0	0	0	0
91821230	2017-10-28	18:06:00	2	6	2	1	1		CHARCOAL				0	0	0	0		LEFT ARM TRAUMA	90	60	102	97	36.6	15.0046	0	0	0	0	0	0	0	0	0	0	0	0	0	0	1	0	0	0	0	0	0	0	0	0	0
91821232	2017-10-28	20:15:00	2	1	2	1	1	0	CHARCOAL	1	0	0	0	0	0	0		BEAN IN EAR	80	40	100	99	35.6	11.1054	0	0	0	0	0	0	0	0	0	0	0	1	0	0	0	0	0	0	0	0	0	0	0	0	0
91821248	2017-10-29	09:29:00	2	2	2	1	1	0	CHARCOAL	1	0	0	1	1	0	0		RIGHT SHOULDER TRAUMA	100	80	119	98	35.9	15.5223	0	0	0	0	0	0	0	0	1	0	0	0	0	0	0	0	0	0	0	0	0	0	0	0	0
91821272	2017-10-29	17:16:00	2	8	2	0	1	0	CHARCOAL+ELECTRICITY	1	0	0	0	1	0	0		BOTTOM LIP TRAUMA			101	98	37	15.168	0	0	0	0	0	0	0	0	0	0	0	1	0	0	0	0	0	0	0	0	0	0	0	0	0
91821304	2017-10-30	10:48:00	2	6	2	1	1	0	CHARCOAL	0	0	0	0	0	0	0		RIGHT ARM PAIN	100	50	108	93	36.2	14.1461	0	0	0	0	0	1	0	0	0	0	0	0	0	0	0	0	0	0	0	0	0	0	0	0	0
91821311	2017-10-30	15:02:00	2	6	2	0	1		CHARCOAL				0	0	0	0		LEFT LEG PAIN	120	70	120	100	36.1	15.2264	0	0	0	0	0	0	0	0	0	0	0	0	0	0	0	0	0	0	0	1	0	0	0	0	0
91821313	2017-10-30	15:47:00	2	4	2	0	1		CHARCOAL				0	0	0	0		RIGHT UPPER LIMB PAIN	120	50	113	99	36	16.508	0	0	0	0	0	1	0	0	0	0	0	0	0	0	0	0	0	0	0	0	0	0	0	0	0
91821315	2017-10-30	16:21:00	2	1	2	1	1		CHARCOAL				0	0	0	0		FOREIGN BODY IN NASAL FOSSA	100	60	118	95	36.2	16.8242	0	0	0	0	0	0	0	0	0	0	0	1	0	0	0	0	0	0	0	0	0	0	0	0	0
240082	2017-04-04		2	2	2	1	1	0	CHARCOAL	0	0	0	0	1	0	0		DIARRHOEA			91	97	36.5	9.68858	0	0	0	0	0	0	0	0	0	0	0	0	0	0	0	0	0	0	0	0	0	0	0	0	0
260165	2017-04-08		2	1	2	0	1	0	CHARCOAL	1	1	0	0	0	0	0		LIMB SWELLING			173	94	38.1	13.4594	0	0	0	0	0	0	0	0	0	0	0	0	0	0	0	0	0	0	0	0	0	0	0	0	0
260627	2017-04-27		2	1	2	1	1	0	CHARCOAL	0	0	0	0	0	0	0		ANASARCA	90	70	140	99	36.6	17.3611	0	0	0	0	0	0	0	0	0	0	0	0	0	0	0	0	0	0	0	0	0	0	0	0	0
260684	2017-04-26		2	1	2	0	1	0	CHARCOAL	0	0	0	0	1	0	0		DIARRHOEA/BODY SWELLING			93		37.1	9.24825	0	0	0	0	0	0	0	0	0	0	0	0	0	0	0	0	0	0	0	0	0	0	0	0	0
9182296	2017-10-09	18:25:00	2	1	2	0	1		CHARCOAL				0	0	0	0		COUGH/DIARRHOEA	90	80			36.6		0	0	0	0	0	0	0	0	0	0	0	0	0	0	0	0	0	0	0	0	0	0	0	0	0
240286	2017-04-13	11:11:00	2	2	2	0	1	0	CHARCOAL+FIREWOOD	0	0	0	0	1	0	0		EAR SWELLING			112	97	36.5	15.7341	0	0	0	0	0	0	0	0	0	0	0	0	0	0	0	0	0	0	0	0	0	0	0	0	0
240388	2017-04-17	09:00:00	2	3	2	0	1	0	CHARCOAL	0	0	0	0	1	0	0		FEVER			109	98	37.3	18.2216	0	0	0	0	0	0	0	0	0	0	0	0	0	0	0	0	0	0	0	0	0	0	0	0	0
240497	2017-04-25		2	1	2	1	1	0	FIREWOOD	0	0	0	0	0	0	0		SKIN RASH			137	99	36.7		0	0	0	0	0	0	0	0	0	0	0	0	0	0	0	0	0	0	0	0	0	0	0	0	0
260074	2017-04-04	15:07:00	2	7	2	0	1	0	CHARCOAL	1	0	0	0	1	0	0		BUTTOCK SWELLING			93	98	36.4	18.75	0	0	0	0	0	0	0	0	0	0	0	0	0	0	0	0	0	0	0	0	0	0	0	0	0
260281	2017-04-10	13:45:00	2	3	2	0	1	0	CHARCOAL	0	0	0	0	0	0	0		PRURITUS	84	57	103	97	37.1	14.6849	0	0	0	0	0	0	0	0	0	0	0	0	0	0	0	0	0	0	0	0	0	0	0	0	0
260285	2017-04-10	09:03:00	2	1	2	0	1	0	CHARCOAL	0	0	0	0	1	0	0		PRURITUS			104	96	36.7	10.2041	0	0	0	0	0	0	0	0	0	0	0	0	0	0	0	0	0	0	0	0	0	0	0	0	0
260353	2017-04-15	15:20:00	2	5	2	0	1	0	CHARCOAL	0	0	0	0	1	0	0		PUS ON THE RIGHT LEG	109	70	129	95	38.6	14.0802	0	0	0	0	0	0	0	0	0	0	0	0	0	0	0	0	0	0	0	0	0	0	0	0	0
260370	2017-04-16	10:25:00	2	1	2	0	1	0	CHARCOAL	0	0	1	0	1	0	0		PRURITUS	110	65	125	99	37	18.3256	0	0	0	0	0	0	0	0	0	0	0	0	0	0	0	0	0	0	0	0	0	0	0	0	0
9182230	2017-10-08	09:12:00	2	2	2	0	1	1	CHARCOAL+ENERGY	0	0	1	0	1	0	0		SKIN RASH	100	60	140	99	36.5	15.5489	0	0	0	0	0	0	0	0	0	0	0	0	0	0	0	0	0	0	0	0	0	0	0	0	0
9182440	2017-10-13	15:10:00	2	2	2	0	1		CHARCOAL				0	0	0	0		FINGER SWELLING	110	80	122	99	36.4	17.037	0	0	0	0	0	0	0	0	0	0	0	0	0	0	0	0	0	0	0	0	0	0	0	0	0
9182737	2017-10-19	10:33:00	2	1	2	0	1		CHARCOAL				0	1	0	0		SKIN ERUPTION			120	92	36.6	14.2187	0	0	0	0	0	0	0	0	0	0	0	0	0	0	0	0	0	0	0	0	0	0	0	0	0
9182828	2017-10-21	10:24:00	2	1	2	1	1		CHARCOAL				0	0	0	0		FINGER SWELLING	100	80	124	99	36.4	13.7396	1	0	0	0	0	0	0	0	0	0	0	0	0	0	0	0	0	0	0	0	0	0	0	0	0
91821107	2017-10-26	09:55:00	2	4	2	1	1		CHARCOAL				0	0	0	0		SKIN LESION	145	86	139	95	36.7	13.551	0	0	0	0	0	0	0	0	0	0	0	0	0	0	0	0	0	0	0	0	0	0	0	0	0
91821300	2017-10-30	10:20:00	2	1	2	1	1		CHARCOAL+ELECTRICITY				0	0	0	0		SCALP ABSCESS	100	60	147	98	36.7	12.8339	0	0	0	0	0	0	0	0	0	0	0	0	0	0	0	0	0	0	0	0	0	0	0	0	0
91821308	2017-10-30	12:36:00	2	5	2	0	1	0	CHARCOAL+FIREWOOD	0	0	1	0	0	0	0		MICRO ABSCESSES	110	50	80	100	36.8	14.3086	0	0	0	0	0	0	0	0	0	0	0	0	0	0	0	0	0	0	0	0	0	0	0	0	0
91821309	2017-10-30	13:00:00	2	4	2	0	1		CHARCOAL				0	0	0	0		RIGHT FOOT SWELLING	120	80	124	98	37.7	11.5593	0	1	0	0	0	0	0	0	0	0	0	0	0	0	0	0	0	0	0	0	0	0	0	0	0
240036	2017-04-01		2	3	2	0	1	1	CHARCOAL	0	0	0	0	0	0	0		FEVER/RHINORRHEA			130	86	34.5	15.6233	0	0	0	0	0	0	0	0	0	0	0	0	0	0	0	0	0	0	0	0	0	0	0	0	0
240048	2017-04-01		2	1	2	0	1	0	GAS	0	0	0	0	0	0	0		COUGH/FEVER/DIFFICULTY BREATHING			102	90	36.9	17.313	0	0	0	0	0	0	0	0	0	0	0	0	0	0	0	0	0	0	0	0	0	0	0	0	0
240115	2017-04-06	10:05:00	2	3	2	0	1	0	GAS	0	0	0	0	0	0	0		FEVER			136	86	38	15.3061	0	0	0	0	0	0	0	0	0	0	0	0	0	0	0	0	0	0	0	0	0	0	0	0	0
240124	2017-04-06	11:36:00	2	2	2	0	1	0	FIREWOOD	0	0	0	0	1	0	0		FEVER			133	98	37.3	14.5159	0	0	0	0	0	0	0	0	0	0	0	0	0	0	0	0	0	0	0	0	0	0	0	0	0
240132	2017-04-04	20:13:00	2	5	2	1	1	1	CHARCOAL	1	0	0	0	1	0	0		COUGH/FEVER			106	95	36.4	14.4099	0	0	0	0	0	0	0	0	0	0	0	0	0	0	0	0	0	0	0	0	0	0	0	0	0
240139	2017-04-03	12:00:00	2	2	2	0	1	0	GAS+CHARCOAL	0	0	0	0	0	0	0		SORE THROAT			173	94	37.1	15.1496	0	0	0	0	0	0	0	0	0	0	0	0	0	0	0	0	0	0	0	0	0	0	0	0	0
240172	2017-04-07	10:15:00	2	1	2	0	1	0	FIREWOOD	0	1	0	0	1	0	0		COUGH			138	91	36.7	16.7653	0	0	0	0	0	0	0	0	0	0	0	0	0	0	0	0	0	0	0	0	0	0	0	0	0
240220	2017-04-11	07:57:00	2	3	2	0	1	1	FIREWOOD	1	0	0	0	1	0	0		CONSTIPATION			98	96	36.3	10.4813	0	0	0	0	0	0	0	0	0	0	0	0	0	0	0	0	0	0	0	0	0	0	0	0	0
240268	2017-04-10	22:30:00	2	4	2	1	1	0	CHARCOAL	0	0	0	0	0	0	0		FEVER	128	65	158	97	38.6	40.8163	0	0	0	0	0	0	0	0	0	0	0	0	0	0	0	0	0	0	0	0	0	0	0	0	0
240281	2017-04-13	15:28:00	2	1	2	1	1	0	CHARCOAL	0	0	0	0	1	0	0		SUDDEN FREQUENT CRYING			130	98	36.9	14.8729	0	0	0	0	0	0	0	0	0	0	0	0	0	0	0	0	0	0	0	0	0	0	0	0	0
240285	2017-04-13	13:07:00	2	1	2	0	1	0	CHARCOAL	0	0	0	0	1	0	0		COUGH			154	90	37	14.8729	0	0	0	0	0	0	0	0	0	0	0	0	0	0	0	0	0	0	0	0	0	0	0	0	0
240413	2017-04-19	18:30:00	2	3	2	1	1	0	CHARCOAL	0	0	0	0	1	0	0		COUGH	115	90	132	96	39.4	11.7835	0	0	0	0	0	0	0	0	0	0	0	0	0	0	0	0	0	0	0	0	0	0	0	0	0
240444	2017-04-15	20:23:00	2	1	2	0	1	0	CHARCOAL	0	0	0	0	0	0	0		COUGH/HOT BODY	130	70	121	96	36.2	15.6157	0	0	0	0	0	0	0	0	0	0	0	0	0	0	0	0	0	0	0	0	0	0	0	0	0
240463	2017-04-23	17:30:00	2	4	2	1	1	0	CHARCOAL	1	0	1	0	1	0	0		NONE 120	120	60	120	97	37.6	15.4321	0	0	0	0	0	0	0	0	0	0	0	0	0	0	0	0	0	0	0	0	0	0	0	0	0
260068	2017-04-04	13:52:00	2	5	2	1	1	0	CHARCOAL	0	0	0	0	0	0	0					140	79	37.4	48.9746	0	0	0	0	0	0	0	0	0	0	0	0	0	0	0	0	0	0	0	0	0	0	0	0	0
260069	2017-04-04	11:38:00	2	1	2	1	1	0	CHARCOAL	0	0	0	0	0	0	0					153	98	35.3	16.8242	0	0	0	0	0	0	0	0	0	0	0	0	0	0	0	0	0	0	0	0	0	0	0	0	0
260107	2017-04-05	17:56:00	2	1	2	0	1	1	CHARCOAL	1	1	0	0	1	0	0		FEVER/COUGH	110	70	115	95	39.5	11.0193	0	0	0	0	0	0	0	0	0	0	0	0	0	0	0	0	0	0	0	0	0	0	0	0	0
260109	2017-04-05	10:35:00	2	6	2	0	1	0	CHARCOAL+GAS	0	0	0	0	1	0	0		HEADACHE			110	95	36.2	16.3194	0	0	0	0	0	0	0	0	0	0	0	0	0	0	0	0	0	0	0	0	0	0	0	0	0
260168	2017-04-08	09:50:00	2	3	2	1	1	0	CHARCOAL+GAS	0	0	0	0	1	0	0		VOMITING			122	93	37.1	14.8025	0	0	0	0	0	0	0	0	0	0	0	0	0	0	0	0	0	0	0	0	0	0	0	0	0
260189	2017-04-08	21:00:00	2	7	2	0	1	0	CHARCOAL	1	0	0	0	0	0	0		COUGH/SLIGHT DIFFICULTY BREATHING	99	66	119	95	36.9	15.0819	0	0	0	0	0	0	0	0	0	0	0	0	0	0	0	0	0	0	0	0	0	0	0	0	0
260226	2017-04-07	01:08:00	2	1	2	0	1	0	CHARCOAL+FIREWOOD	0	0	1	0	0	0	0		DIFFICULTY BREATHING			108		37	1.3493	0	0	0	0	0	0	0	0	0	0	0	0	0	0	0	0	0	0	0	0	0	0	0	0	0
260259	2017-04-12	11:43:00	2	3	2	1	1	0	FIREWOOD	0	0	0	0	1	0	0		FEVER			145	96	38.9	13.2212	0	0	0	0	0	0	0	0	0	0	0	0	0	0	0	0	0	0	0	0	0	0	0	0	0
260304	2017-04-13	20:40:00	2	5	2	0	1	0	CHARCOAL+GAS	0	0	0	0	1	0	0		COUGH/DIFFICULTY BREATHING			143	94	37.8	14.1497	0	0	0	0	0	0	0	0	0	0	0	0	0	0	0	0	0	0	0	0	0	0	0	0	0
260354	2017-04-15	13:10:00	2	8	2	0	1	0	CHARCOAL	0	0	0	0	0	0	0		DIFFICULTY BREATHING	120	60	126	93	37.1	12.237	0	0	0	0	0	0	0	0	0	0	0	0	0	0	0	0	0	0	0	0	0	0	0	0	0
260380	2017-04-16	17:38:00	2	4	2	0	1	0	CHARCOAL	0	0	0	0	0	0	0		FEVER	84	70	127	97	38.4	14.0496	0	0	0	0	0	0	0	0	0	0	0	0	0	0	0	0	0	0	0	0	0	0	0	0	0
260391	2017-04-16	05:19:00	2	1	2	0	1	0	CHARCOAL	1	0	0	0	0	0	0		FEVER			130	95	39.1	15.8541	0	0	0	0	0	0	0	0	0	0	0	0	0	0	0	0	0	0	0	0	0	0	0	0	0
260433	2017-04-19	14:46:00	2	4	2	0	1	0	CHARCOAL	0	0	0	0	0	0	0		FEVER	115	90	128	99	38.6	15.7025	0	0	0	0	0	0	0	0	0	0	0	0	0	0	0	0	0	0	0	0	0	0	0	0	0
260473	2017-04-20	13:30:00	2	2	2	1	1	0	CHARCOAL	1	0	0	0	0	0	0		COUGH/HOT BODY	110	60	114	97	36.4	16.225	0	0	0	0	0	0	0	0	0	0	0	0	0	0	0	0	0	0	0	0	0	0	0	0	0
260565	2017-04-23	12:00:00	2	4	2	1	1	0	CHARCOAL	1	0	0	0	1	0	0		COUGH	120	70	140	95	37	18.0609	0	0	0	0	0	0	0	0	0	0	0	0	0	0	0	0	0	0	0	0	0	0	0	0	0
260573	2017-04-24	21:10:00	2	3	2	1	1	0	CHARCOAL	0	0	0	0	1	0	0		PAIN ON SWALLOWING	120	60	124	98	37.9	14.1059	0	0	0	0	0	0	0	0	0	0	0	0	0	0	0	0	0	0	0	0	0	0	0	0	0
260599	2017-04-27	08:00:00	2	3	2	0	1	0	CHARCOAL	0	0	0	0	0	0	0		COUGH/FEVER	120	51	110	99	37.4	36.8828	0	0	0	0	0	0	0	0	0	0	0	0	0	0	0	0	0	0	0	0	0	0	0	0	0
260613	2017-04-22	08:05:00	2	8	2	1	1	0	CHARCOAL	0	0	0	1	0	0	0		FEVER/THROAT PAIN	170	60	104	97	39.8	18.0041	0	0	0	0	0	0	0	0	0	0	0	0	0	0	0	0	0	0	0	0	0	0	0	0	0
260728	2017-04-23	22:20:00	2	1	2	0	1	0	CHARCOAL	0	0	0	0	0	0	0		FEVER	120	70	80	96	37	18.0469	0	0	0	0	0	0	0	0	0	0	0	0	0	0	0	0	0	0	0	0	0	0	0	0	0
918214	2017-10-01	08:32:00	2	6	2	1	1	1	CHARCOAL	1	0	0	0	1	0	0		FEVER					36.4	12.6962	0	0	0	0	0	0	0	0	0	0	0	0	0	0	0	0	0	0	0	0	0	0	0	0	0
918220	2017-10-01	16:58:00	2	4	2	1	1	0	CHARCOAL+ELECTRIC OVEN	0	0	1	0	1	0	0		FEVER	100	60			36.7	16.0322	0	0	0	0	0	0	0	0	0	0	0	0	0	0	0	0	0	0	0	0	0	0	0	0	0
918225	2017-10-01	06:16:00	2	5	2	0	1		CHARCOAL				0	1	0	0		FEVER/COUGH	120	60	110		36.6	14.7929	0	0	0	0	0	0	0	0	0	0	0	0	0	0	0	0	0	0	0	0	0	0	0	0	0
918229	2017-10-02	07:38:00	2	8	2	1	1		CHARCOAL+ENERGY				0	1	0	1		FEVER/COUGH	80	40	83		36	13.2918	0	0	0	0	0	0	0	0	0	0	0	0	0	0	0	0	0	0	0	0	0	0	0	0	0
918233	2017-10-02	17:53:00	2	6	2	0	1	0	CHARCOAL	0	0	0	0	0	0	0		FEVER	96	52	88	98	37	13.0809	0	0	0	0	0	0	0	0	0	0	0	0	0	0	0	0	0	0	0	0	0	0	0	0	0
918235	2017-10-02	08:19:00	2	9	2	1	1	0	CHARCOAL+ELECTRIC+GAS	1	0	0	0	0	0	0		FEVER	101	40	75		36.5	15.9691	0	0	0	0	0	0	0	0	0	0	0	0	0	0	0	0	0	0	0	0	0	0	0	0	0
918272	2017-10-03	11:51:00	2	5	2	1	1		CHARCOAL				0	1	0	0		FEVER FOR 2 WEEKS	90	50	172	96	38.3	13.3918	0	0	0	0	0	0	0	0	0	0	0	0	0	0	0	0	0	0	0	0	0	0	0	0	0
918286	2017-10-04	06:23:00	2	1	2	0	1	0	CHARCOAL	1	1	0	0	1	0	0		COUGH/DIFFICULTY BREATHING	80	30	157	92	37.6	18.6267	0	0	0	0	0	0	0	0	0	0	0	0	0	0	0	0	0	0	0	0	0	0	0	0	0
9182105	2017-10-04	08:10:00	2	2	2	1	1	0	CHARCOAL	1	0	0	0	1	0	0		FEVER	100	70	110		37.3	11.8147	0	0	0	0	0	0	0	0	0	0	0	0	0	0	0	0	0	0	0	0	0	0	0	0	0
9182117	2017-10-04	19:31:00	2	7	2	0	1	0	CHARCOAL	1	0	0	0	1	0	0		FEVER/COUGH	110	80	102	100	37.3	21.8437	0	0	0	0	0	0	0	0	0	0	0	0	0	0	0	0	0	0	0	0	0	0	0	0	0
9182126	2017-10-07	05:17:00	2	2	2	1	1		CHARCOAL				0	1	0	0		COUGH/FEVER	120	80	117	88	36.9	16.901	0	0	0	0	0	0	0	0	0	0	0	0	0	0	0	0	0	0	0	0	0	0	0	0	0
9182129	2017-10-05	11:15:00	2	2	2	0	1		CHARCOAL				0	1	0	0		COUGH/HOT/DIFFICULTY BREATHING	100	90	190	97	36.9	15.2249	0	0	0	0	0	0	0	0	0	0	0	0	0	0	0	0	0	0	0	0	0	0	0	0	0
9182133	2017-10-05	08:46:00	2	3	2	0	1						0	1	0	0		COUGH/HOT BODY	85	80	121	94	36.8	15	0	0	0	0	0	0	0	0	0	0	0	0	0	0	0	0	0	0	0	0	0	0	0	0	0
9182135	2017-10-05	08:27:00	2	5	2	0	1		CHARCOAL				0	1	0	0		COUGH/HOT BODY	100	80	120	97	36.8	16.1979	0	0	0	0	0	0	0	0	0	0	0	0	0	0	0	0	0	0	0	0	0	0	0	0	0
9182136	2017-10-05	08:30:00	2	8	2	1	1	0	CHARCOAL	1	0	0	0	1	0	0		COUGH/HOT BODY	110	90	125	98	36.8	14.5288	0	0	0	0	0	0	0	0	0	0	0	0	0	0	0	0	0	0	0	0	0	0	0	0	0
9182137	2017-10-05	15:45:00	2	1	2	1	1		CHARCOAL				0	0	0	0		COUGH/HOT/DIFFICULTY BREATHING	110	80	130	98	36.6	15.011	0	0	0	0	0	0	0	0	0	0	0	0	0	0	0	0	0	0	0	0	0	0	0	0	0
9182156	2017-10-05	21:43:00	2	7	2	1	1	0	CHARCOAL	0	1	0	0	1	0	0		VOMITING	120	86	124	88	37.4	17.094	0	0	0	0	0	0	0	0	0	0	0	0	0	0	0	0	0	0	0	0	0	0	0	0	0
9182158	2017-10-06	06:38:00	2	2	2	0	1	0	CHARCOAL	0	0	0	0	1	0	0		FEVER	114	87	139	93	37.4	15.4203	0	0	0	0	0	0	0	0	0	0	0	0	0	0	0	0	0	0	0	0	0	0	0	0	0
9182181	2017-10-06	09:25:00	2	7	2	1	1	1	CHARCOAL	1	0	0	0	1	0	0		COUGH	110	60	115	99	37.8	14.172	0	0	0	0	0	0	0	0	0	0	0	0	0	0	0	0	0	0	0	0	0	0	0	0	0
9182203	2017-10-07	09:44:00	2	2	2	1	1		CHARCOAL				0	0	0	0		COUGH/FEVER	100	70	120	97	37.1	15.0825	0	0	0	0	0	0	0	0	0	0	0	0	0	0	0	0	0	0	0	0	0	0	0	0	0
9182223	2017-10-08	06:36:00	2	4	2	0	1		CHARCOAL				0	1	0	0		GENERALIZED PAIN	110	80	132	99	38.3	16.665	0	0	0	0	0	0	0	0	0	0	0	0	0	0	0	0	0	0	0	0	0	0	0	0	0
9182225	2017-10-08	06:11:00	2	3	2	1	1		CHARCOAL				0	0	0	0		COUGH	90	50	137	98	37.2	17.6513	0	0	0	0	0	0	0	0	0	0	0	0	0	0	0	0	0	0	0	0	0	0	0	0	0
9182233	2017-10-08	09:25:00	2	7	2	1	1	1	CHARCOAL	1	1	1	1	0	0	0		DIFFICULTY BREATHING	100	70	120	96	37.5	15.296	0	0	0	0	0	0	0	0	0	0	0	0	0	0	0	0	0	0	0	0	0	0	0	0	0
9182243	2017-10-08	12:30:00	2	1	2	0	1	0	CHARCOAL	1	0	0	0	1	0	0		FEVER	100	70	166	98	38.3	15.0617	0	0	0	0	0	0	0	0	0	0	0	0	0	0	0	0	0	0	0	0	0	0	0	0	0
9182284	2017-10-09	13:27:00	2	2	2	1	1		CHARCOAL				0	0	0	0		INTERMITTENT FEVER/FEVER	90	50	152	89	36.7	16.2505	0	0	0	0	0	0	0	0	0	0	0	0	0	0	0	0	0	0	0	0	0	0	0	0	0
9182317	2017-10-10	09:43:00	2	5	2	0	1		CHARCOAL				0	0	0	0		FEVER/ASTHENIA/COUGH	110	95	105	99	36.6	16.7319	0	0	0	0	0	0	0	0	0	0	0	0	0	0	0	0	0	0	0	0	0	0	0	0	0
9182333	2017-10-10	19:39:00	2	3	2	0	1	0	CHARCOAL	1	0	0	0	0	0	0		CHEST PAIN	106	82	105	99	36.6	30.1134	0	0	0	0	0	0	0	0	0	0	0	0	0	0	0	0	0	0	0	0	0	0	0	0	0
9182345	2017-10-11	08:41:00	2	1	2	0	1		CHARCOAL				1	0	0	0		VOMITING/WEAKNESS/HOT/COUGH			145	96	36.4	13.5858	0	0	0	0	0	0	0	0	0	0	0	0	0	0	0	0	0	0	0	0	0	0	0	0	0
9182387	2017-10-12	09:42:00	2	1	2	1	1	0	GAS	1	1	1	0	1	0	0		FEVER			114	87	37.5	108.131	0	0	0	0	0	0	0	0	0	0	0	0	0	0	0	0	0	0	0	0	0	0	0	0	0
9182392	2017-10-12	11:05:00	2	2	2	0	1	1	CHARCOAL	1	0	0	0	1	0	0		FEVER			114	98	37.6	101.224	0	0	0	0	0	0	0	0	0	0	0	0	0	0	0	0	0	0	0	0	0	0	0	0	0
9182400	2017-10-12	16:12:00	2	1	2	1	1	0	CHARCOAL	0	1	0	0	1	0	0		FEVER			183	73	40.2	18.9349	0	0	0	0	0	0	0	0	0	0	0	0	0	0	0	0	0	0	0	0	0	0	0	0	0
9182496	2017-10-15	12:04:00	2	1	2	1	1	0	CHARCOAL	1	1	0	0	1	0	0		COUGH	100	80	121		38.7	14.6285	0	0	0	0	0	0	0	0	0	0	0	0	0	0	0	0	0	0	0	0	0	0	0	0	0
9182498	2017-10-15	13:16:00	2	4	2	1	1		CHARCOAL				0	1	0	0		FEVER	100	80	123		37	14.2149	0	0	0	0	0	0	0	0	0	0	0	0	0	0	0	0	0	0	0	0	0	0	0	0	0
9182500	2017-10-15	13:55:00	2	5	2	0	1		CHARCOAL				0	0	0	0		MOUTH PAIN	100	70	125	99	37.8	13.3135	0	0	0	0	0	0	0	0	0	0	0	0	0	0	0	0	0	0	0	0	0	0	0	0	0
9182503	2017-10-15	15:00:00	2	5	2	0	1		CHARCOAL				0	1	0	0		FEVER	100	80	120		34.2	16.1868	0	0	0	0	0	0	0	0	0	0	0	0	0	0	0	0	0	0	0	0	0	0	0	0	0
9182506	2017-10-15	15:26:00	2	4	2	1	1	1	GAS+CHARCOAL	1	0	0	0	1	0	0		FEVER	100	80	125		38.5	13.7949	0	0	0	0	0	0	0	0	0	0	0	0	0	0	0	0	0	0	0	0	0	0	0	0	0
9182544	2017-10-16	08:48:00	2	4	2	0	1		CHARCOAL+GAS				0	0	0	0		HEAD PAIN/SORE THROAT	90	60			37.1	17.301	0	0	0	0	0	0	0	0	0	0	0	0	0	0	0	0	0	0	0	0	0	0	0	0	0
9182587	2017-10-17	05:20:00	2	1	2	0	1	1	CHARCOAL	0	0	0	0	0	0	0		FEVER/COUGH	112	89	82	71	40	14.7929	0	0	0	0	0	0	0	0	0	0	0	0	0	0	0	0	0	0	0	0	0	0	0	0	0
9182689	2017-10-18	11:59:00	2	4	2	1	1	0	CHARCOAL	1	0	0	0	1	0	0		COUGH/HOT BODY	200	85	169	99	37.7	15.0815	0	0	0	0	0	0	0	0	0	0	0	0	0	0	0	0	0	0	0	0	0	0	0	0	0
9182702	2017-10-18	17:13:00	2	2	2	0	1	0		0	1	1	0	1	0	0		ALL-OVER SICKNESS/STOMACH ACHE	120	90	117	99	37.1	13.8744	0	0	0	0	0	0	0	0	0	0	0	0	0	0	0	0	0	0	0	0	0	0	0	0	0
9182704	2017-10-18	18:25:00	2	3	2	0	1		CHARCOAL				0	0	0	0		COUGH/HOT/VOMITING	140	90	139	99	37.3	11.6909	0	0	0	0	0	0	0	0	0	0	0	0	0	0	0	0	0	0	0	0	0	0	0	0	0
9182715	2017-10-19	06:00:00	2	9	2	0	1		FIREWOOD				0	1	0	0		FEVER/COUGH	100	75	121	100	38.2	15.1629	0	0	0	0	0	0	0	0	0	0	0	0	0	0	0	0	0	0	0	0	0	0	0	0	0
9182717	2017-10-19	06:40:00	2	3	2	1	1		CHARCOAL				0	1	0	0		ABDOMINAL PAIN	95	70	101	99	36.2	10.5	0	0	0	0	0	0	0	0	0	0	0	0	0	0	0	0	0	0	0	0	0	0	0	0	0
9182720	2017-10-19	07:28:00	2	1	2	1	1	0	CHARCOAL+FIREWOOD	1	1	0	1	1	0	0		FEVER			111	92	37.6	14.0625	0	0	0	0	0	0	0	0	0	0	0	0	0	0	0	0	0	0	0	0	0	0	0	0	0
9182721	2017-10-19	07:52:00	2	5	2	1	3		CHARCOAL				0	1	0	0		FEVER	110	90	114	81	36.4	15.2189	0	0	0	0	0	0	0	0	0	0	0	0	0	0	0	0	0	0	0	0	0	0	0	0	0
9182726	2017-10-19	08:27:00	2	2	2	1	1	0	CHARCOAL	1	0	0	0	0	0	0		FEVER	120	99	125	99	36.5	15.4931	0	0	0	0	0	0	0	0	0	0	0	0	0	0	0	0	0	0	0	0	0	0	0	0	0
9182812	2017-10-21	05:26:00	2	3	2	0	1		CHARCOAL				0	1	0	0		FEVER	100	80	132	99	38.8	15.1496	0	0	0	0	0	0	0	0	0	0	0	0	0	0	0	0	0	0	0	0	0	0	0	0	0
9182872	2017-10-22	05:55:00	2	5	2	0	1	0	CHARCOAL+GAS	1	0	0	0	1	0	0		FEVER	120	60	111	100	37.5	16.1712	0	0	0	0	0	0	0	0	0	0	0	0	0	0	0	0	0	0	0	0	0	0	0	0	0
9182887	2017-10-22	09:35:00	2	5	2	1	1	1	CHARCOAL	1	0	0	0	1	0	0		FEVER	90	50	131	77	37.6	15.2552	0	0	0	0	0	0	0	0	0	0	0	0	0	0	0	0	0	0	0	0	0	0	0	0	0
9182896	2017-10-22	12:34:00	2	4	2	0	1	1	CHARCOAL	1	1	1	0	1	0	0		COUGH			142	90	37.1	17.1967	0	0	0	0	0	0	0	0	0	0	0	0	0	0	0	0	0	0	0	0	0	0	0	0	0
9182905	2017-10-22	15:33:00	2	1	2	0	1	1	CHARCOAL+ELECTRICITY	1	0	0	0	0	0	0		COUGH			122	81	36.6		0	0	0	0	0	0	0	0	0	0	0	0	0	0	0	0	0	0	0	0	0	0	0	0	0
9182907	2017-10-22	15:46:00	2	1	2	0	1						0	1	0	0		FEVER			130	97	37	16.2106	0	0	0	0	0	0	0	0	0	0	0	0	0	0	0	0	0	0	0	0	0	0	0	0	0
91821011	2017-10-24	10:32:00	2	3	2	1	1	0	CHARCOAL	1	0	0	0	1	0	0		FEVER/COUGH	80	60	115	99	36.4	14.4175	0	0	0	0	0	0	0	0	0	0	0	0	0	0	0	0	0	0	0	0	0	0	0	0	0
91821095	2017-10-25	22:00:00	2	3	2	1	1		CHARCOAL+ENERGY				0	1	0	0		FEVER			110	96	36.6	16.0485	0	0	0	0	0	0	0	0	0	0	0	0	0	0	0	0	0	0	0	0	0	0	0	0	0
91821149	2017-10-27	08:01:00	2	3	2	1	1		CHARCOAL				0	1	0	0		FEVER	80	60	154	94	39.3	14.0595	0	0	0	0	0	0	0	0	0	0	0	0	0	0	0	0	0	0	0	0	0	0	0	0	0
91821159	2017-10-27	09:10:00	2	4	2	0	1		CHARCOAL				0	1	0	0		COUGH	110	60	128	97	35.6	14.7462	0	0	0	0	0	0	0	0	0	0	0	0	0	0	0	0	0	0	0	0	0	0	0	0	0
91821183	2017-10-27	16:11:00	2	6	2	1	1		CHARCOAL				0	1	0	0		COUGH	110	80	135	91	37.3	15.5846	0	0	0	0	0	0	0	0	0	0	0	0	0	0	0	0	0	0	0	0	0	0	0	0	0
91821206	2017-10-28	09:10:00	2	9	2	1	1	0	CHARCOAL	1	0	0	0	1	0	0		FEVER	100	60	103	98	36	7.3492	0	0	0	0	0	0	0	0	0	0	0	0	0	0	0	0	0	0	0	0	0	0	0	0	0
91821214	2017-10-28	11:54:00	2	3	2	1	1	0	CHARCOAL	1	0	0	0	1	0	0		FEVER	80	60	136	99	36.6	11.971	0	0	0	0	0	0	0	0	0	0	0	0	0	0	0	0	0	0	0	0	0	0	0	0	0
91821215	2017-10-28	12:06:00	2	1	2	0	1	0	CHARCOAL	1	0	0	0	0	0	0		FEVER	100	60	116	95	36.6	15.8443	0	0	0	0	0	0	0	0	0	0	0	0	0	0	0	0	0	0	0	0	0	0	0	0	0
91821253	2017-10-29	10:22:00	2	1	2	1	1		CHARCOAL				0	0	0	0		FEVER	100	80	119	99	36.1	17.3754	0	0	0	0	0	0	0	0	0	0	0	0	0	0	0	0	0	0	0	0	0	0	0	0	0
91821293	2017-10-30	09:22:00	2	2	2	1	1	0	CHARCOAL	1	0	0	0	0	0	0		ALLERGIC COUGH	120	50	99	98	36.2	13.468	0	0	0	0	0	0	0	0	0	0	0	0	0	0	0	0	0	0	0	0	0	0	0	0	0
9182561	2017-10-16	12:04:00	2	2	2	0	1		CHARCOAL				0	0	0	0		DIFFICULTY MOVING	100	63			36.2	18.2345	0	0	0	0	0	0	0	0	0	0	0	0	0	0	0	0	0	0	0	0	0	0	0	0	0
91821280	2017-10-30	06:13:00	2	1	2	1	1	0	CHARCOAL	0	1	0	0	1	0	0		FREQUENT CRYING/FEVER			100	99	34.8	25.102	0	0	0	0	0	0	0	0	0	0	0	0	0	0	0	0	0	0	0	0	0	0	0	0	0
240123	2017-04-06	15:24:00	2	6	2	0	1	0	CHARCOAL	0	1	0	0	1	0	0		KNEE WOUND	86	69	123	86	37.2	13.8036	0	0	0	0	0	0	0	0	0	0	0	0	0	0	0	0	0	0	0	0	0	0	0	0	0
240557	2017-04-30	20:31:00	2	1	2	0	1	0	CHARCOAL	0	0	0	0	0	0	0		FEVER			185	99	37.9		0	0	0	0	0	0	0	0	0	0	0	0	0	0	0	0	0	0	0	0	0	0	0	0	0
9182271	2017-10-09	09:07:00	2	7	2	1	1		FIREWOOD+CHARCOAL				0	0	0	0		LEFT ARM PAIN	120	80	116	99	35.9	16.8038	0	0	0	0	0	0	0	0	0	0	0	0	0	0	0	1	0	0	0	0	0	0	0	0	0
9182283	2017-10-09	13:23:00	2	3	2	0	1		CHARCOAL				0	0	0	0		FOOT PAIN	90	40	172	92	37.3	21.3675	0	1	0	0	0	0	0	0	0	0	0	0	0	0	0	0	0	0	0	0	0	0	0	0	0
91821295	2017-10-30	09:33:00	2	3	2	1	1		CHARCOAL+FIREWOOD				0	0	0	0		DIFFICULTY MOVING	100	60	97	94	36	11.0193	0	0	0	1	0	0	0	0	0	0	0	0	0	0	0	0	0	0	0	0	0	0	0	0	0
240310	2017-04-14	14:30:00	2	1	2	0	1	0	CHARCOAL	0	0	0	0	0	0	0		DIFFICULTY URINATING			99	98	36.6	17.284	0	0	0	0	0	0	0	0	0	0	0	0	0	0	0	0	0	0	0	0	0	0	0	0	0
260280	2017-04-10	14:30:00	2	2	2	0	1	0	CHARCOAL	0	0	0	0	1	0	0		FEVER			102	79	37.9	13.1488	0	0	0	0	0	0	0	0	0	0	0	0	0	0	0	0	0	0	0	0	0	0	0	0	0
918212	2017-10-01	07:37:00	2	2	2	0	1	1	CHARCOAL	1	1	0	0	1	0	0		GENITAL INFLAMMATION					35.3	15.6986	0	0	0	0	0	0	0	0	0	0	0	0	0	0	0	0	0	0	0	0	0	0	0	0	0
9182187	2017-10-06	05:40:00	2	4	2	0	1		CHARCOAL				0	1	0	0		FEVER	110	80	100	99	39.5	46.5561	0	0	0	0	0	0	0	0	0	0	0	0	0	0	0	0	0	0	0	0	0	0	0	0	0
9182219	2017-10-07	14:44:00	2	1	2	0	1		CHARCOAL				0	0	0	0		WHOLE BODY SWELLING	90	60	99	98	36.6	14.505	0	0	0	0	0	0	0	0	0	0	0	0	0	0	0	0	0	0	0	0	0	0	0	0	0
9182405	2017-10-12	20:10:00	2	6	2	0	1	0	CHARCOAL	1	0	0	0	1	0	0		DYSURIA			80	99	36.2	14.4444	0	0	0	0	0	0	0	0	0	0	0	0	0	0	0	0	0	0	0	0	0	0	0	0	0
9182489	2017-10-15	09:17:00	2	7	2	0	1		CHARCOAL				0	1	0	0		FEVER	110	80	123		36.5	19.1716	0	0	0	0	0	0	0	0	0	0	0	0	0	0	0	0	0	0	0	0	0	0	0	0	0
9182492	2017-10-15	10:42:00	2	4	2	1	1		CHARCOAL				0	1	0	0		EYELID INFLAMMATION	110	80	124		36.5	16.3636	0	0	0	0	0	0	0	0	0	0	0	0	0	0	0	0	0	0	0	0	0	0	0	0	0
9182526	2017-10-15	20:26:00	2	1	2	1	1	0	CHARCOAL	1	0	0	0	1	0	0		DIARRHOEA	80	40	102		35.3	15.6157	0	0	0	0	0	0	0	0	0	0	0	0	0	0	0	0	0	0	0	0	0	0	0	0	0
9182771	2017-10-20	08:31:00	2	4	2	0	1		CHARCOAL				0	1	0	0		PENIS TRAPED IN ZIP	100	75	107	98	36.5	13.6961	0	0	0	0	0	0	0	0	0	0	0	0	0	0	0	0	0	0	0	0	0	0	0	1	0
9182815	2017-10-21	07:59:00	2	7	2	1	1		FIREWOOD				0	0	0	0		VAGINAL PAIN AND DISCHARGE	100	80	104	99	36.7		1	0	0	0	0	0	0	0	0	0	0	0	0	0	0	0	0	0	0	0	0	0	0	0	0
91821302	2017-10-30	10:35:00	2	2	2	0	1		CHARCOAL+ELECTRICITY				0	0	0	0		DIFFICULTY URINATING	100	90	103	98	36.5	11.1762	0	0	0	0	0	0	0	0	0	0	0	0	0	0	0	0	0	0	0	0	0	0	0	0	0
260008	2017-04-02	09:00:00	2	1	2	1	1	0	CHARCOAL	0	0	0	0	0	0	0		LEFT EYE PAIN	110	80	109	98	36.2	19.4083	0	0	0	0	0	0	0	0	0	0	0	0	0	0	0	0	0	0	0	0	0	0	0	1	0
9182778	2017-10-20	09:42:00	2	3	2	1	1	0	CHARCOAL	1	1	0	0	1	0	0		PAINFUL EYES/RHEUM	95	75	102	100	37	15.2784	0	0	0	0	0	0	0	0	0	0	0	0	0	0	0	0	0	0	0	0	0	0	0	0	0
240140	2017-04-03	13:08:00	2	4	2	1	1	0	CHARCOAL	1	0	0	0	1	0	0		EAR SWELLING			186	96	36.1	15.8443	0	0	0	0	0	0	0	0	0	0	0	0	0	0	0	0	0	0	0	0	0	0	0	0	0
260459	2017-04-20	09:29:00	2	9	2	0	1	0	CHARCOAL	0	1	0	0	1	0	0		LEFT EAR PAIN	100	70	103	97	36.7	13.9371	0	0	0	0	0	0	0	0	0	0	0	0	0	0	0	0	0	0	0	0	0	0	0	0	0
260642	2017-04-28	20:19:00	2	4	2	0	1	0	CHARCOAL	1	0	0	0	0	0	0		ITCHING BEHIND THE EAR	90	60	100	97	35.9	11.1111	0	0	0	0	0	0	0	0	0	0	0	0	0	0	0	0	0	0	0	0	0	0	0	0	0
9182382	2017-10-12	07:48:00	2	3	2	0	1	1	CHARCOAL	0	0	0	0	1	0	0		PUS FROM RIGHT EAR	80	60	137	98	35.7	17.8571	0	0	0	0	0	0	0	0	0	0	0	0	0	0	0	0	0	0	0	0	0	0	0	0	0
240387	2017-04-17	09:30:00	2	1	2	1	1	0	FIREWOOD	0	0	0	0	0	0	0		SWELLING IN RIGHT INGUINAL REGION			98	87	36.7	13.2095	0	0	0	0	0	0	0	0	0	0	0	0	0	0	0	0	0	0	0	0	0	0	0	0	0
260368	2017-04-16	12:00:00	2	4	2	1	1	0	CHARCOAL	0	0	0	0	0	0	0		FACIAL TRAUMA	120	70	120	98	37	12.9758	0	0	0	0	0	0	0	0	0	0	0	1	0	0	0	0	0	0	0	0	0	0	0	0	0
260412	2017-04-19		2	5	2	0	1	0	CHARCOAL	1	0	0	0	0	0	0		ABDOMINAL PAIN AND DISTENSION	60	20	150		36.3	14.491	0	0	0	0	0	0	0	0	0	0	0	0	0	0	0	0	0	0	0	0	0	0	0	0	0
260489	2017-04-18	13:25:00	2	1	2	0	1	0	CHARCOAL	0	0	0	0	0	0	0		FEVER/DIARRHOEA			91		37.3	15.1005	0	0	0	0	0	0	0	0	0	0	0	0	0	0	0	0	0	0	0	0	0	0	0	0	0
260587	2017-04-26		2	2	2	1	1	0	CHARCOAL	0	0	0	1	0	0	0		DIARRHOEA	120	70	115	95	35.2	12.9848	0	0	0	0	0	0	0	0	0	0	0	0	0	0	0	0	0	0	0	0	0	0	0	0	0
9182342	2017-10-11	07:59:00	2	1	2	1	1		CHARCOAL				0	1	0	0		DIARRHOEA/VOMITING	100	70	156	99	36.7	14.8892	0	0	0	0	0	0	0	0	0	0	0	0	0	0	0	0	0	0	0	0	0	0	0	0	0
9182396	2017-10-12	12:43:00	2	2	2	0	1		CHARCOAL				0	0	0	0		FEVER			166	94	39.6	13.6823	0	0	0	0	0	0	0	0	0	0	0	0	0	0	0	0	0	0	0	0	0	0	0	0	0
9182718	2017-10-19	06:42:00	2	4	2	0	1		CHARCOAL				0	1	0	0		DIARRHOEA/STOMACH PAIN	100	80	136	97	35.8	15.6107	0	0	0	0	0	0	0	0	0	0	0	0	0	0	0	0	0	0	0	0	0	0	0	0	0
91821164	2017-10-27	10:35:00	2	9	2	0	1	0	CHARCOAL	1	0	1	0	1	0	0		WATERY DIARRHOEA	90	60	137	99	36.4	13.7484	0	0	0	0	0	0	0	0	0	0	0	0	0	0	0	0	0	0	0	0	0	0	0	0	0
91821208	2017-10-28	09:34:00	2	2	2	0	1	0	CHARCOAL	0	1	0	0	0	0	0		FEVER	90	60	113	99	36.7	14.3337	0	0	0	0	0	0	0	0	0	0	0	0	0	0	0	0	0	0	0	0	0	0	0	0	0
91821279	2017-10-30	05:34:00	2	1	2	1	1		CHARCOAL+FIREWOOD				0	1	0	0		DIARRHOEA			135	99	35.2	12.948	0	0	0	0	0	0	0	0	0	0	0	0	0	0	0	0	0	0	0	0	0	0	0	0	0
91821310	2017-10-30	13:59:00	2	6	2	1	1		CHARCOAL				0	0	0	0		FEVER/ABDOMINAL PAIN/VOMITING	100	60	110	100	36.3	14.0259	0	0	0	0	0	0	0	0	0	0	0	0	0	0	0	0	0	0	0	0	0	0	0	0	0
260497	2017-04-18		2	7	2	0	1	0	CHARCOAL	0	0	0	0	0	0	0		FEVER/DIFFICULTY BREATHING	100	80	74		36.4	15.2836	0	0	0	0	0	0	0	0	0	0	0	0	0	0	0	0	0	0	0	0	0	0	0	0	0
9182314	2017-10-10	08:27:00	2	1	2	1	1		CHARCOAL+FIREWOOD				0	0	0	0		FEVER/COUGH	110	80	110	80	39	15.3125	0	0	0	0	0	0	0	0	0	0	0	0	0	0	0	0	0	0	0	0	0	0	0	0	0
9182329	2017-10-10	15:15:00	2	1	2	0	1		CHARCOAL				0	1	0	0		FEVER			96	84	39.4	16.6933	0	0	0	0	0	0	0	0	0	0	0	0	0	0	0	0	0	0	0	0	0	0	0	0	0
9182441	2017-10-13	15:31:00	2	9	2	0	1		CHARCOAL				0	1	0	0		SPINE PAIN/ABDOMINAL PAIN/FEVER	110	50	109	100	37.1	13.3014	0	0	0	0	0	0	0	0	0	0	0	0	0	0	0	0	0	0	0	0	0	0	0	0	0
9182568	2017-10-16	14:24:00	2	8	2	1	1						0	0	0	0		INTERMITTENT FEVER	90	60			37.7		0	0	0	0	0	0	0	0	0	0	0	0	0	0	0	0	0	0	0	0	0	0	0	0	0
9182599	2017-10-17	08:24:00	2	3	2	1	1		CHARCOAL				0	1	0	0		FEVER					38.3	12.0443	0	0	0	0	0	0	0	0	0	0	0	0	0	0	0	0	0	0	0	0	0	0	0	0	0
91821111	2017-10-26	10:18:00	2	2	2	0	1		CHARCOAL				0	1	0	0		FEVER/COUGH	143	80	183	89	37.1	13.6457	0	0	0	0	0	0	0	0	0	0	0	0	0	0	0	0	0	0	0	0	0	0	0	0	0
240290	2017-04-13	09:19:00	2	6	2	0	1	0	CHARCOAL+FIREWOOD	0	0	0	0	1	0	0		INCREASED WEIGHT LOSS			99		36	6.61157	0	0	0	0	0	0	0	0	0	0	0	0	0	0	0	0	0	0	0	0	0	0	0	0	0
240499	2017-04-25	16:16:00	2	4	2	0	1	0	FIREWOOD	0	0	0	0	0	0	0		GENITAL SWELLING	110	60	110	98	36.7	19.7531	0	0	0	0	0	0	0	0	0	0	0	0	0	0	0	0	0	0	0	0	0	0	0	0	0
9182272	2017-10-09	09:22:00	2	1	2	1	1		FIREWOOD				0	0	0	0		ABSENCE OF VAGINAL CANAL			120	98	35.7	19.2871	0	0	0	0	0	0	0	0	0	0	0	0	0	0	0	0	0	0	0	0	0	0	0	0	0
240038	2017-04-01		2	3	2	0	1	0	FIREWOOD	0	0	0	0	1	0	0		FEVER/CONVULSIONS			94	94	37.7	15.9556	0	0	0	0	0	0	0	0	0	0	0	0	0	0	0	0	0	0	0	0	0	0	0	0	0
240044	2017-04-01		2	3	2	0	1	0	FIREWOOD	0	0	0	0	1	0	0		FEVER/CONVULSIONS			164	97	37.5	16.0494	0	0	0	0	0	0	0	0	0	0	0	0	0	0	0	0	0	0	0	0	0	0	0	0	0
240052	2017-04-01	23:55:00	2	1	2	0	1	0	CHARCOAL	0	0	0	0	0	0	0		DIARRHOEA					33.5	13.1492	0	0	0	0	0	0	0	0	0	0	0	0	0	0	0	0	0	0	0	0	0	0	0	0	0
240053	2017-04-02	06:30:00	2	3	2	1	1	0	CHARCOAL	0	0	0	0	1	0	0		DIARRHOEA					37.2	17.6745	0	0	0	0	0	0	0	0	0	0	0	0	0	0	0	0	0	0	0	0	0	0	0	0	0
240080	2017-04-04	03:53:00	2	1	2	1	1	0	NATURAL COAL	1	0	0	0	1	0	0		FEVER			105	98	39.2	24.9433	0	0	0	0	0	0	0	0	0	0	0	0	0	0	0	0	0	0	0	0	0	0	0	0	0
240116	2017-04-06	09:09:00	2	7	2	0	1	0	CHARCOAL	0	0	0	0	1	0	0		FEVER			151	88	38	13.8889	0	0	0	0	0	0	0	0	0	0	0	0	0	0	0	0	0	0	0	0	0	0	0	0	0
240137	2017-04-03	09:30:00	2	2	2	0	1	0	CHARCOAL	1	1	0	0	1	0	0		FEVER	183	62	128	91	37.2	14.5125	0	0	0	0	0	0	0	0	0	0	0	0	0	0	0	0	0	0	0	0	0	0	0	0	0
240138	2017-04-03	10:04:00	2	2	2	1	1	0	CHARCOAL	0	1	1	0	1	0	0		FEVER	139	94	163	98	36.9	15.8541	0	0	0	0	0	0	0	0	0	0	0	0	0	0	0	0	0	0	0	0	0	0	0	0	0
240145	2017-04-03		2	2	2	1	1	0	FIREWOOD	0	1	0	0	1	0	0		FEVER/GENERALIZED WEAKNESS			173	89	36.9	11.4468	0	0	0	0	0	0	0	0	0	0	0	0	0	0	0	0	0	0	0	0	0	0	0	0	0
240146	2017-04-03	16:18:00	2	3	2	0	1	0	CHARCOAL	0	0	1	0	1	0	0		DIARRHOEA/VOMITING			143	98	36.7	14.5994	0	0	0	0	0	0	0	0	0	0	0	0	0	0	0	0	0	0	0	0	0	0	0	0	0
240171	2017-04-07		2	6	2	0	1	0	CHARCOAL	1	0	0	0	1	0	0		FEVER	117	101	168	98	39.8	16.1588	0	0	0	0	0	0	0	0	0	0	0	0	0	0	0	0	0	0	0	0	0	0	0	0	0
240173	2017-04-07	09:00:00	2	2	2	0	1	0	CHARCOAL	0	0	0	0	1	0	0		DIARRHOEA			104	97	36.8	14.4673	0	0	0	0	0	0	0	0	0	0	0	0	0	0	0	0	0	0	0	0	0	0	0	0	0
240181	2017-04-07	17:30:00	2	4	2	1	1	0	CHARCOAL	1	0	0	0	1	0	0		FEVER			129	95	37.4	15.0364	0	0	0	0	0	0	0	0	0	0	0	0	0	0	0	0	0	0	0	0	0	0	0	0	0
240221	2017-04-11	13:24:00	2	4	2	0	1	0	CHARCOAL	0	0	0	0	0	0	0		FEVER			144	98	38.3	15.9948	0	0	0	0	0	0	0	0	0	0	0	0	0	0	0	0	0	0	0	0	0	0	0	0	0
240222	2017-04-11		2	4	2	0	1	0	CHARCOAL	0	0	0	0	0	0	0		FEVER			157	98	37.4	17.2049	0	0	0	0	0	0	0	0	0	0	0	0	0	0	0	0	0	0	0	0	0	0	0	0	0
240225	2017-04-11		2	2	2	0	1	0	FIREWOOD	0	0	0	0	0	0	0		STOMACH SWELLING/FEVER			95	58	35.8	15.5817	0	0	0	0	0	0	0	0	0	0	0	0	0	0	0	0	0	0	0	0	0	0	0	0	0
240227	2017-04-11	10:17:00	2	6	2	0	1	1	CHARCOAL	1	0	0	0	1	0	0		SORE THROAT/FEVER	100	69	109	95	36.6	15.5356	0	0	0	0	0	0	0	0	0	0	0	0	0	0	0	0	0	0	0	0	0	0	0	0	0
240267	2017-04-10	20:32:00	2	9	2	0	1	0	CHARCOAL	1	0	0	0	0	0	0		ABDOMINAL PAIN/FEVER	116	64	125	98	37	16.7075	0	0	0	0	0	0	0	0	0	0	0	0	0	0	0	0	0	0	0	0	0	0	0	0	0
240279	2017-04-13	17:50:00	2	1	2	0	1	0	CHARCOAL	0	0	0	0	1	0	0		FEVER/CONSTIPATION			178	98	39.4	16.1011	0	0	0	0	0	0	0	0	0	0	0	0	0	0	0	0	0	0	0	0	0	0	0	0	0
240282	2017-04-13	13:38:00	2	5	2	0	1	0	CHARCOAL	1	0	0	0	1	0	0		FEVER			157	96	38.8	14.9716	0	0	0	0	0	0	0	0	0	0	0	0	0	0	0	0	0	0	0	0	0	0	0	0	0
240283	2017-04-13	13:23:00	2	1	2	0	1	0	CHARCOAL	0	0	0	0	0	0	0		FEVER/DIFFICULTY SWALLOWING			170	98	39	16	0	0	0	0	0	0	0	0	0	0	0	0	0	0	0	0	0	0	0	0	0	0	0	0	0
240284	2017-04-13	12:45:00	2	1	2	0	1	0	CHARCOAL	0	1	0	0	1	0	0		DIARRHOEA			117	94	36.8	15.2249	0	0	0	0	0	0	0	0	0	0	0	0	0	0	0	0	0	0	0	0	0	0	0	0	0
240287	2017-04-13	11:00:00	2	7	2	0	1	0	CHARCOAL	0	0	0	0	0	0	0		FEVER			154	95	40.7	18.9887	0	0	0	0	0	0	0	0	0	0	0	0	0	0	0	0	0	0	0	0	0	0	0	0	0
240289	2017-04-13	09:25:00	2	1	2	1	1	0	CHARCOAL	0	0	0	0	1	0	0		DIARRHOEA			133	98	37.3	19.3879	0	0	0	0	0	0	0	0	0	0	0	0	0	0	0	0	0	0	0	0	0	0	0	0	0
240309	2017-04-14		2	3	2	0	1	0	CHARCOAL	0	0	0	0	1	0	0		FEVER			147	97	37.3	14.8502	0	0	0	0	0	0	0	0	0	0	0	0	0	0	0	0	0	0	0	0	0	0	0	0	0
240317	2017-04-14	18:12:00	2	5	2	1	1	0	CHARCOAL	0	0	0	0	1	0	0		FEVER			151	98	39.3	14.8278	0	0	0	0	0	0	0	0	0	0	0	0	0	0	0	0	0	0	0	0	0	0	0	0	0
240378	2017-04-18		2	1	2	1	1	0	FIREWOOD	0	0	0	0	0	0	0		DEHYDRATION			122	87	36.8	16.8032	0	0	0	0	0	0	0	0	0	0	0	0	0	0	0	0	0	0	0	0	0	0	0	0	0
240384	2017-04-18		2	2	2	1	1	0	CHARCOAL	0	0	0	0	1	0	0		FEVER			103	87	38.3	16.2707	0	0	0	0	0	0	0	0	0	0	0	0	0	0	0	0	0	0	0	0	0	0	0	0	0
240385	2017-04-17	14:00:00	2	1	2	0	1	0	CHARCOAL	0	0	0	0	1	0	0		FEVER			100	57	40.3	17.3049	0	0	0	0	0	0	0	0	0	0	0	0	0	0	0	0	0	0	0	0	0	0	0	0	0
240428	2017-04-21		2	8	2	0	1	0	CHARCOAL	0	1	1	0	0	0	0		HOT	110	40	113	100	38.6	13.0785	0	0	0	0	0	0	0	0	0	0	0	0	0	0	0	0	0	0	0	0	0	0	0	0	0
240435	2017-04-21	20:26:00	2	1	2	1	1	0	CHARCOAL	1	1	0	0	0	0	0		DIARRHOEA	60	20	137	99	36.9	18.2735	0	0	0	0	0	0	0	0	0	0	0	0	0	0	0	0	0	0	0	0	0	0	0	0	0
240445	2017-04-23	08:20:00	2	4	2	0	1	0	CHARCOAL	1	0	0	0	0	0	0		FEVER	120	80	124	99	38.8	15.4861	0	0	0	0	0	0	0	0	0	0	0	0	0	0	0	0	0	0	0	0	0	0	0	0	0
240446	2017-04-23		2	5	2	0	1	0	CHARCOAL	1	1	0	0	1	0	0		FEVER	100	60	124	100	36.3	15.8025	0	0	0	0	0	0	0	0	0	0	0	0	0	0	0	0	0	0	0	0	0	0	0	0	0
240447	2017-04-23		2	1	2	1	1	0	CHARCOAL	0	1	0	0	0	0	0		FEVER			130	100	35	25	0	0	0	0	0	0	0	0	0	0	0	0	0	0	0	0	0	0	0	0	0	0	0	0	0
240466	2017-04-23	06:49:00	2	7	2	0	1	0	CHARCOAL	0	0	0	0	1	0	0		HEADACHE/FEVER	110	60	124	99	38.5	15.5992	0	0	0	0	0	0	0	0	0	0	0	0	0	0	0	0	0	0	0	0	0	0	0	0	0
240467	2017-04-23	22:45:00	2	4	2	0	1	0	CHARCOAL	0	0	0	0	1	0	0		VOMITING	100	40	133	100	35.1	16.5406	0	0	0	0	0	0	0	0	0	0	0	0	0	0	0	0	0	0	0	0	0	0	0	0	0
240492	2017-04-21	16:00:00	2	1	2	0	1	0	CHARCOAL	0	0	0	0	1	0	0		FEVER/ANOREXIA			171	97	39.3	21.004	0	0	0	0	0	0	0	0	0	0	0	0	0	0	0	0	0	0	0	0	0	0	0	0	0
240494	2017-04-21	17:12:00	2	2	2	1	1	0	CHARCOAL	0	1	0	0	1	0	0		ABDOMINAL PAIN			154	99	35.2	12.481	0	0	0	0	0	0	0	0	0	0	0	0	0	0	0	0	0	0	0	0	0	0	0	0	0
240498	2017-04-25	15:53:00	2	6	2	0	1	0	CHARCOAL	0	0	0	0	0	0	0		FEVER	90	60	120	99	38.2	15.3787	0	0	0	0	0	0	0	0	0	0	0	0	0	0	0	0	0	0	0	0	0	0	0	0	0
240500	2017-04-25		2	2	2	1	1	0	CHARCOAL	0	0	0	0	0	0	0		FEVER	115	91	171	97	37		0	0	0	0	0	0	0	0	0	0	0	0	0	0	0	0	0	0	0	0	0	0	0	0	0
240504	2017-04-25	10:39:00	2	3	2	0	1	0	CHARCOAL	0	0	0	0	0	0	0		DIARRHOEA/VOMITING	100	80	170	90	36.6	15.408	0	0	0	0	0	0	0	0	0	0	0	0	0	0	0	0	0	0	0	0	0	0	0	0	0
240506	2017-04-25	07:00:00	2	5	2	1	1	0	CHARCOAL	0	0	0	0	1	0	0		FEVER/DIARRHOEA	110	50	124	98	36.1	12.8099	0	0	0	0	0	0	0	0	0	0	0	0	0	0	0	0	0	0	0	0	0	0	0	0	0
240537	2017-04-30	00:50:00	2	1	2	1	1	0	CHARCOAL	0	0	0	0	0	0	0		DIARRHOEA	130	70	139	98	35.2	15.6988	0	0	0	0	0	0	0	0	0	0	0	0	0	0	0	0	0	0	0	0	0	0	0	0	0
240540	2017-04-30		2	4	2	0	1	0	CHARCOAL	0	0	0	0	1	0	0		CONVULSIONS	120	80	145	96	38.7	15.8147	0	0	0	0	0	0	0	0	0	0	0	0	0	0	0	0	0	0	0	0	0	0	0	0	0
240558	2017-04-30	19:00:00	2	4	2	0	1	0	CHARCOAL	0	0	0	0	1	0	0		DIARRHOEA	100	70	124	99	37.4	17.8465	0	0	0	0	0	0	0	0	0	0	0	0	0	0	0	0	0	0	0	0	0	0	0	0	0
260023	2017-04-02	12:30:00	2	3	2	0	1	0	CHARCOAL+FIREWOOD	0	0	0	0	1	0	0		ARM PAIN/FEVER	110	80	127	96	38.2	21.7994	0	0	0	0	0	0	1	0	0	0	0	0	0	0	0	0	0	0	0	0	0	0	0	0	0
260024	2017-04-02	15:00:00	2	9	2	1	1	0	CHARCOAL	0	0	1	0	1	0	0		FEVER	110	80	129	95	36.7	10.4889	0	0	0	0	0	0	0	0	0	0	0	0	0	0	0	0	0	0	0	0	0	0	0	0	0
260028	2017-04-02	09:50:00	2	3	2	0	1	0	CHARCOAL	0	0	0	0	1	0	0		FEVER	110	80	133	97	36.6	20.0319	0	0	0	0	0	0	0	0	0	0	0	0	0	0	0	0	0	0	0	0	0	0	0	0	0
260064	2017-04-04		2	2	2	0	1	0	FIREWOOD	0	0	0	0	1	0	0		FEVER			126	98	35.6	9.08976	0	0	0	0	0	0	0	0	0	0	0	0	0	0	0	0	0	0	0	0	0	0	0	0	0
260101	2017-04-05		2	1	2	1	1	0	CHARCOAL	0	0	0	0	1	0	0		COUGH/DYSPNOEA	100	80	170	97	36.7	60.3538	0	0	0	0	0	0	0	0	0	0	0	0	0	0	0	0	0	0	0	0	0	0	0	0	0
260103	2017-04-05	18:32:00	2	7	2	1	1	1	CHARCOAL	1	0	0	0	1	0	0		HEADACHE/FEVER/VOMITING	120	80	100	96	39.1	14.4628	0	0	0	0	0	0	0	0	0	0	0	0	0	0	0	0	0	0	0	0	0	0	0	0	0
260104	2017-04-05	15:40:00	2	2	2	0	1	1	CHARCOAL	1	0	0	1	1	0	0		FEVER	110	90	150	96	39.5	17.4191	0	0	0	0	0	0	0	0	0	0	0	0	0	0	0	0	0	0	0	0	0	0	0	0	0
260105	2017-04-05		2	1	2	1	1	1	CHARCOAL	1	0	1	0	1	0	0		FEVER	110	70	138	96	36.8	9.18274	0	0	0	0	0	0	0	0	0	0	0	0	0	0	0	0	0	0	0	0	0	0	0	0	0
260110	2017-04-05	06:00:00	2	3	2	1	1	0	CHARCOAL	0	0	0	1	1	0	0		FEVER/WEAKNESS	110	80	120	96	37	25.0772	0	0	0	0	0	0	0	0	0	0	0	0	0	0	0	0	0	0	0	0	0	0	0	0	0
260112	2017-04-05	12:58:00	2	1	2	0	1	0	FIREWOOD	0	1	0	0	1	0	0		FEVER			116	95	37.3	17.313	0	0	0	0	0	0	0	0	0	0	0	0	0	0	0	0	0	0	0	0	0	0	0	0	0
260113	2017-04-05	12:51:00	2	1	2	0	1	1	FIREWOOD	0	0	0	0	1	0	0		FEVER	110	85	122	95	35.6	30.2343	0	0	0	0	0	0	0	0	0	0	0	0	0	0	0	0	0	0	0	0	0	0	0	0	0
260166	2017-04-08	10:50:00	2	4	2	0	1	0	CHARCOAL	0	1	0	0	1	0	0		FEVER			139	94	39	12.86	0	0	0	0	0	0	0	0	0	0	0	0	0	0	0	0	0	0	0	0	0	0	0	0	0
260167	2017-04-08	09:17:00	2	2	2	0	1	0	CHARCOAL	0	0	0	0	1	0	0		FEVER			163	89	37.9	16.508	0	0	0	0	0	0	0	0	0	0	0	0	0	0	0	0	0	0	0	0	0	0	0	0	0
260170	2017-04-08	11:15:00	2	2	2	0	1	0	CHARCOAL	0	0	0	0	0	0	0		FEVER			171	94	38.8	15.8193	0	0	0	0	0	0	0	0	0	0	0	0	0	0	0	0	0	0	0	0	0	0	0	0	0
260174	2017-04-08	14:20:00	2	1	2	0	1	0	CHARCOAL	1	1	0	0	1	0	0		HIGH FEVER			171	93	39.5	15.9505	0	0	0	0	0	0	0	0	0	0	0	0	0	0	0	0	0	0	0	0	0	0	0	0	0
260188	2017-04-08		2	3	2	0	1	0	CHARCOAL	1	0	1	0	1	0	0		HOT BODY			138	98	40.1	15.2552	0	0	0	0	0	0	0	0	0	0	0	0	0	0	0	0	0	0	0	0	0	0	0	0	0
260190	2017-04-09		2	1	2	1	1	0	CHARCOAL	1	0	1	0	0	0	0		HOT BODY/FAINT			179	95	41.1		0	0	0	0	0	0	0	0	0	0	0	0	0	0	0	0	0	0	0	0	0	0	0	0	0
260191	2017-04-09	06:34:00	2	3	2	0	1	0	CHARCOAL	0	0	0	0	1	0	0		HOT BODY/HEADACHE/STOMACH PAIN			114	96	38.8	9.46045	0	0	0	0	0	0	0	0	0	0	0	0	0	0	0	0	0	0	0	0	0	0	0	0	0
260196	2017-04-09		2	2	2	0	1	0	CHARCOAL	1	0	1	0	1	0	0		FEVER			40	80	38.8	17.2958	0	0	0	0	0	0	0	0	0	0	0	0	0	0	0	0	0	0	0	0	0	0	0	0	0
260198	2017-04-09		2	2	2	1	1	0	CHARCOAL	0	1	0	0	1	0	0		FEVER/CONVULSIONS			174	91	38.1	17.3155	0	0	0	0	0	0	0	0	0	0	0	0	0	0	0	0	0	0	0	0	0	0	0	0	0
260200	2017-04-09		2	4	2	0	1	0	FIREWOOD	0	1	0	0	1	0	0		FEVER			131	90	37.6	13.6676	0	0	0	0	0	0	0	0	0	0	0	0	0	0	0	0	0	0	0	0	0	0	0	0	0
260202	2017-04-09		2	4	2	0	1	0	CHARCOAL	1	0	1	0	1	0	0		FEVER			131	97	36.6	13.8222	0	0	0	0	0	0	0	0	0	0	0	0	0	0	0	0	0	0	0	0	0	0	0	0	0
260203	2017-04-09	11:50:00	2	5	2	1	1	0	CHARCOAL+GAS	1	0	1	0	1	0	0		FEVER			122	99	36.6	12.6962	0	0	0	0	0	0	0	0	0	0	0	0	0	0	0	0	0	0	0	0	0	0	0	0	0
260206	2017-04-09	17:09:00	2	1	2	0	1	0	CHARCOAL	0	0	0	0	1	0	0		FEVER/CONVULSIONS			40	87	35.9	20.0877	0	0	0	0	0	0	0	0	0	0	0	0	0	0	0	0	0	0	0	0	0	0	0	0	0
260208	2017-04-09		2	2	2	1	1	0	FIREWOOD	0	1	1	0	1	0	0		FEVER	89	65	143	99	36	14.3707	0	0	0	0	0	0	0	0	0	0	0	0	0	0	0	0	0	0	0	0	0	0	0	0	0
260224	2017-04-08		2	2	2	1	1	0	CHARCOAL	0	0	0	0	1	0	0		FEVER/FAINTING			124	62	37.7	9.9654	0	0	0	0	0	0	0	0	0	0	0	0	0	0	0	0	0	0	0	0	0	0	0	0	0
260244	2017-04-09	07:45:00	2	2	2	0	1	0	FIREWOOD	1	1	0	0	1	0	0		FEVER			143	96	39	14.6025	0	0	0	0	0	0	0	0	0	0	0	0	0	0	0	0	0	0	0	0	0	0	0	0	0
260273	2017-04-12		2	1	2	1	1	0	CHARCOAL	0	0	0	0	0	0	0		FEVER			120	98	36.7	12.7604	0	0	0	0	0	0	0	0	0	0	0	0	0	0	0	0	0	0	0	0	0	0	0	0	0
260279	2017-04-10		2	3	2	0	1	0	CHARCOAL	0	0	0	0	1	0	0		DIARRHOEA/VOMITING			97	97	35.7	14.8721	0	0	0	0	0	0	0	0	0	0	0	0	0	0	0	0	0	0	0	0	0	0	0	0	0
260322	2017-04-11	20:30:00	2	2	2	1	1	0	FIREWOOD	0	1	0	0	0	0	0		DIARRHOEA/VOMITING			137	96	35.6	13.8233	0	0	0	0	0	0	0	0	0	0	0	0	0	0	0	0	0	0	0	0	0	0	0	0	0
260328	2017-04-12	12:40:00	2	4	2	0	1	0	CHARCOAL	0	0	0	0	1	0	0		FEVER			97	96	38	12.4783	0	0	0	0	0	0	0	0	0	0	0	0	0	0	0	0	0	0	0	0	0	0	0	0	0
260352	2017-04-15	15:33:00	2	2	2	0	1	0	CHARCOAL	0	0	0	0	1	0	0		HEADACHE/FEVER	120	85	162	95	37.3	15.6986	0	0	0	0	0	0	0	0	0	0	0	0	0	0	0	0	0	0	0	0	0	0	0	0	0
260355	2017-04-15	09:15:00	2	5	2	0	1	0	CHARCOAL	0	0	0	0	0	0	0		DIARRHOEA	120	80	124	96	36.5	14.6448	0	0	0	0	0	0	0	0	0	0	0	0	0	0	0	0	0	0	0	0	0	0	0	0	0
260356	2017-04-15	11:10:00	2	2	2	0	1	0	FIREWOOD	0	0	0	0	0	0	0		FEVER	98	68	123	96	36.7	14.7929	0	0	0	0	0	0	0	0	0	0	0	0	0	0	0	0	0	0	0	0	0	0	0	0	0
260358	2017-04-15	12:15:00	2	1	2	1	1	0	CHARCOAL	0	0	0	0	0	0	0		ABDOMINAL DISTENSION	98	86	139	96	36.6	16.0231	0	0	0	0	0	0	0	0	0	0	0	0	0	0	0	0	0	0	0	0	0	0	0	0	0
260371	2017-04-16		2	5	2	0	1	0	FIREWOOD	0	0	0	0	0	0	0		FEVER			108	99	38	13.6676	0	0	0	0	0	0	0	0	0	0	0	0	0	0	0	0	0	0	0	0	0	0	0	0	0
260389	2017-04-16	20:46:00	2	3	2	0	1	0	CHARCOAL	0	0	0	0	0	0	0		FEVER			148	98	38.6	16.4101	0	0	0	0	0	0	0	0	0	0	0	0	0	0	0	0	0	0	0	0	0	0	0	0	0
260390	2017-04-16	21:50:00	2	4	2	1	1	0	CHARCOAL	0	0	0	0	0	0	0		FEVER			169	93	39.5	13.6834	0	0	0	0	0	0	0	0	0	0	0	0	0	0	0	0	0	0	0	0	0	0	0	0	0
260407	2017-04-19	08:26:00	2	9	2	1	1	0	CHARCOAL	0	0	0	0	0	0	0		FEVER	120	89			38.6	18.7172	0	0	0	0	0	0	0	0	0	0	0	0	0	0	0	0	0	0	0	0	0	0	0	0	0
260408	2017-04-19	07:21:00	2	8	2	0	1	0	CHARCOAL	0	0	0	0	0	0	0		FEVER	80	40	130	98	38.4	15.2778	0	0	0	0	0	0	0	0	0	0	0	0	0	0	0	0	0	0	0	0	0	0	0	0	0
260413	2017-04-19		2	1	2	1	1	0	CHARCOAL	0	0	0	0	0	0	0		FEVER	79	45	140	98	41	6.85871	0	0	0	0	0	0	0	0	0	0	0	0	0	0	0	0	0	0	0	0	0	0	0	0	0
260441	2017-04-14	10:10:00	2	1	2	0	1	0	CHARCOAL	0	0	0	0	1	0	0		FEVER	118	70	107	95	36.5	17.5533	0	0	0	0	0	0	0	0	0	0	0	0	0	0	0	0	0	0	0	0	0	0	0	0	0
260450	2017-04-18		2	5	2	0	1	0	CHARCOAL	0	0	0	0	1	0	0		DIARRHOEA	100	60	90		37.6	15.6944	0	0	0	0	0	0	0	0	0	0	0	0	0	0	0	0	0	0	0	0	0	0	0	0	0
260456	2017-04-20	07:38:00	2	1	2	1	1	0	CHARCOAL+FIREWOOD	0	0	0	0	1	0	0		DIFFICULTY BREATHING/COUGH			104	95	37	15.5102	0	0	0	0	0	0	0	0	0	0	0	0	0	0	0	0	0	0	0	0	0	0	0	0	0
260472	2017-04-20	14:00:00	2	9	2	1	1	0	CHARCOAL	0	0	0	0	1	0	0		HOT/HEADACHE	100	50	113	99	36.5	12.426	0	0	0	0	0	0	0	0	0	0	0	0	0	0	0	0	0	0	0	0	0	0	0	0	0
260474	2017-04-20		2	2	2	1	1	0	CHARCOAL	0	0	0	0	1	0	0		HOT/GENITAL SWELLING	100	50	133	97	37.6	11.8064	0	0	0	0	0	0	0	0	0	0	0	0	0	0	0	0	0	0	0	0	0	0	0	0	0
260481	2017-04-20		2	5	2	1	1	0	CHARCOAL	0	1	1	0	1	0	0		HOT	110	50	168	97	38.5	9.56633	0	0	0	0	0	0	0	0	0	0	0	0	0	0	0	0	0	0	0	0	0	0	0	0	0
260482	2017-04-16	06:10:00	2	3	2	1	1	0	CHARCOAL	0	0	0	0	1	0	0		HOT BODY/VOMITING	130	80	142	94	39.2	14	0	0	0	0	0	0	0	0	0	0	0	0	0	0	0	0	0	0	0	0	0	0	0	0	0
260483	2017-04-15		2	2	2	1	1	0	CHARCOAL	0	1	0	0	1	0	0		HOT BODY/FAINT	110	70	132	95	38.1	12.9113	0	0	0	0	0	0	0	0	0	0	0	0	0	0	0	0	0	0	0	0	0	0	0	0	0
260490	2017-04-18	13:45:00	2	6	2	1	1	0	CHARCOAL	0	0	0	0	1	0	0		FEVER/VOMITING			84		36.8	16.0241	0	0	0	0	0	0	0	0	0	0	0	0	0	0	0	0	0	0	0	0	0	0	0	0	0
260492	2017-04-18	08:23:00	2	4	2	1	1	0	CHARCOAL	0	0	1	0	1	0	0		FEVER/MALAISE			82		37.3	12.3967	0	0	0	0	0	0	0	0	0	0	0	0	0	0	0	0	0	0	0	0	0	0	0	0	0
260493	2017-04-18	08:59:00	2	3	2	0	1	0	CHARCOAL	0	0	0	0	1	0	0		FEVER			78		36.2	13.5129	0	0	0	0	0	0	0	0	0	0	0	0	0	0	0	0	0	0	0	0	0	0	0	0	0
260526	2017-04-20	05:56:00	2	3	2	0	1	0	CHARCOAL	1	0	0	0	1	0	0		DIARRHOEA WITH BLOOD/FEVER	130	90	140	99	37.9	15.4108	0	0	0	0	0	0	0	0	0	0	0	0	0	0	0	0	0	0	0	0	0	0	0	0	0
260552	2017-04-24	11:17:00	2	5	2	0	1	0	CHARCOAL	0	0	0	0	1	0	0		FEVER	100	60	150	98	39.8	14.2382	0	0	0	0	0	0	0	0	0	0	0	0	0	0	0	0	0	0	0	0	0	0	0	0	0
260553	2017-04-24	11:23:00	2	2	2	1	1	0	FIREWOOD	0	0	0	0	0	0	0		FEVER	100	50	73	83	38.9	14.5399	0	0	0	0	0	0	0	0	0	0	0	0	0	0	0	0	0	0	0	0	0	0	0	0	0
260564	2017-04-23		2	2	2	1	1	0	CHARCOAL	0	0	0	0	1	0	0		FEVER	110	60	123	100	37.8	14.5682	0	0	0	0	0	0	0	0	0	0	0	0	0	0	0	0	0	0	0	0	0	0	0	0	0
260589	2017-04-22	19:04:00	2	5	2	0	1	0	CHARCOAL+ENERGY	0	0	0	0	0	0	0		FEVER/HEADACHE	120	70	169	98	39.4	14.5605	0	0	0	0	0	0	0	0	0	0	0	0	0	0	0	0	0	0	0	0	0	0	0	0	0
260593	2017-04-26		2	4	2	1	1	0	CHARCOAL	1	0	0	0	1	0	0		WEAKNESS/FEVER	120	60	92	99	36.6	12.46	0	0	0	0	0	0	0	0	0	0	0	0	0	0	0	0	0	0	0	0	0	0	0	0	0
260608	2017-04-22		2	1	2	0	1	0	CHARCOAL	0	0	0	0	0	0	0		DIARRHOEA/FEVER	90	60	90	94	36.4	12.1884	0	0	0	0	0	0	0	0	0	0	0	0	0	0	0	0	0	0	0	0	0	0	0	0	0
260609	2017-04-22	11:14:00	2	4	2	0	1	0	CHARCOAL+FIREWOOD	0	0	0	0	1	0	0		STOMACH SWELLING/FEVER	120	75	147	95	35.6	14.8794	0	0	0	0	0	0	0	0	0	0	0	0	0	0	0	0	0	0	0	0	0	0	0	0	0
260634	2017-04-27	17:20:00	2	3	2	1	1	0	CHARCOAL	0	0	0	0	0	0	0		FEVER/DIARRHOEA	90	60	120	99	38.9	16	0	0	0	0	0	0	0	0	0	0	0	0	0	0	0	0	0	0	0	0	0	0	0	0	0
260636	2017-04-27	13:26:00	2	3	2	1	1	0	CHARCOAL	0	0	0	0	0	0	0		FEVER/COUGH	90	70	157	98	39.4	13.7588	0	0	0	0	0	0	0	0	0	0	0	0	0	0	0	0	0	0	0	0	0	0	0	0	0
260648	2017-04-28		2	1	2	0	1	0	CHARCOAL	0	0	0	0	0	0	0		DIARRHOEA/VOMITING			120	95	37.7	15.9184	0	0	0	0	0	0	0	0	0	0	0	0	0	0	0	0	0	0	0	0	0	0	0	0	0
260649	2017-04-28		2	1	2	1	1	0	CHARCOAL	0	0	1	0	1	0	0		FEVER			162	97	36.2	16.4366	0	0	0	0	0	0	0	0	0	0	0	0	0	0	0	0	0	0	0	0	0	0	0	0	0
260685	2017-04-26		2	7	2	0	1	0	FIREWOOD	0	0	0	0	1	0	0		FEVER			84		36.6	14.6332	0	0	0	0	0	0	0	0	0	0	0	0	0	0	0	0	0	0	0	0	0	0	0	0	0
260710	2017-04-28	06:30:00	2	2	2	0	1	0	CHARCOAL	0	0	0	0	1	0	0		DIARRHOEA	70	40	117	99	35.7	14.1777	0	0	0	0	0	0	0	0	0	0	0	0	0	0	0	0	0	0	0	0	0	0	0	0	0
260726	2017-04-30		2	1	2	1	1	0	FIREWOOD	0	0	0	0	1	0	0		FEVER	130	90	158	96	35	8.3936	0	0	0	0	0	0	0	0	0	0	0	0	0	0	0	0	0	0	0	0	0	0	0	0	0
260727	2017-04-24	11:00:00	2	1	2	0	1	0	CHARCOAL	0	0	0	0	1	0	0		FEVER/DIARRHOEA	122	90	144	81	38	14.7972	0	0	0	0	0	0	0	0	0	0	0	0	0	0	0	0	0	0	0	0	0	0	0	0	0
260729	2017-04-24		2	7	2	1	1	0	CHARCOAL	0	0	0	0	1	0	0		FEVER	95	80	162	99	37.2	15.8449	0	0	0	0	0	0	0	0	0	0	0	0	0	0	0	0	0	0	0	0	0	0	0	0	0
918226	2017-10-03	07:00:00	2	9	2	1	1		CHARCOAL				0	1	0	0		HEADACHE	120	50	98		36.1	32.2314	0	0	0	0	0	0	0	0	0	0	0	0	0	0	0	0	0	0	0	0	0	0	0	0	0
918234	2017-10-02	08:49:00	2	2	2	0	1	0	CHARCOAL	0	0	0	0	0	0	0		STOMACH SWELLING	112	82	69		36.9		0	0	0	0	0	0	0	0	0	0	0	0	0	0	0	0	0	0	0	0	0	0	0	0	0
918244	2017-10-02	20:48:00	2	1	2	1	1	0	CHARCOAL	0	0	0	0	0	0	0		DIARRHOEA/VOMITING	100	40	100	90	36.6	37.2	0	0	0	0	0	0	0	0	0	0	0	0	0	0	0	0	0	0	0	0	0	0	0	0	0
918245	2017-10-03	04:05:00	2	1	2	1	1	0	CHARCOAL	0	0	0	0	1	0	0		DIARRHOEA	90	60	114	97	36	24.0964	0	0	0	0	0	0	0	0	0	0	0	0	0	0	0	0	0	0	0	0	0	0	0	0	0
918270	2017-10-03	10:48:00	2	1	2	1	1		CHARCOAL				0	1	0	0		FEVER/CONVULSIONS	90	60	167	99	37.6		0	0	0	0	0	0	0	0	0	0	0	0	0	0	0	0	0	0	0	0	0	0	0	0	0
918285	2017-10-03	01:36:00	2	2	2	1	1	0	CHARCOAL	0	0	0	0	1	0	0		DIARRHOEA/VOMITING			112	98	36.7	13.9711	0	0	0	0	0	0	0	0	0	0	0	0	0	0	0	0	0	0	0	0	0	0	0	0	0
9182109	2017-10-04	10:20:00	2	6	2	1	1		CHARCOAL				0	1	0	0		FEVER	110	60	144	96	39.4	15.8521	0	0	0	0	0	0	0	0	0	0	0	0	0	0	0	0	0	0	0	0	0	0	0	0	0
9182110	2017-10-04	10:27:00	2	5	2	0	1		CHARCOAL				0	1	0	0		FEVER	80	50	115	99	37.6	14.4117	0	0	0	0	0	0	0	0	0	0	0	0	0	0	0	0	0	0	0	0	0	0	0	0	0
9182128	2017-10-05	11:52:00	2	9	2	1	1						0	1	0	0		HOT BODY/VOMITING/FAINT	120	100	167	97	37.4	15.424	0	0	0	0	0	0	0	0	0	0	0	0	0	0	0	0	0	0	0	0	0	0	0	0	0
9182134	2017-10-05	08:04:00	2	9	2	1	1		CHARCOAL				0	1	0	0		ROUNDWORMS	100	80	86	98	36.9	16.3496	0	0	0	0	0	0	0	0	0	0	0	0	0	0	0	0	0	0	0	0	0	0	0	0	0
9182192	2017-10-07	19:33:00	2	2	2	0	1	0	CHARCOAL	1	0	0	0	1	0	0		FEVER/VOMITING	110	90	177	82	37.9	14.8193	0	0	0	0	0	0	0	0	0	0	0	0	0	0	0	0	0	0	0	0	0	0	0	0	0
9182204	2017-10-07	16:20:00	2	1	2	0	1		CHARCOAL				0	0	0	0		INTERMITTENT FEVER	110	70	124	96	38.4	16.8186	0	0	0	0	0	0	0	0	0	0	0	0	0	0	0	0	0	0	0	0	0	0	0	0	0
9182222	2017-10-07	19:27:00	2	1	2	1	1		CHARCOAL				0	1	0	0		FEVER	110	70	138	100	36.2	16.3831	0	0	0	0	0	0	0	0	0	0	0	0	0	0	0	0	0	0	0	0	0	0	0	0	0
9182245	2017-10-08	14:13:00	2	2	2	1	1	1	CHARCOAL	1	0	0	0	0	0	0		WATERY DIARRHOEA	90	60	160	95	37.2	15.5955	0	0	0	0	0	0	0	0	0	0	0	0	0	0	0	0	0	0	0	0	0	0	0	0	0
9182250	2017-10-08	16:22:00	2	5	2	1	1	1		1	0	1	0	1	0	0		FEVER	100	60	143	96	38.4	13.203	0	0	0	0	0	0	0	0	0	0	0	0	0	0	0	0	0	0	0	0	0	0	0	0	0
9182261	2017-10-09	05:38:00	2	1	2	1	1	0	CHARCOAL	1	0	0	0	1	0	0		DIARRHOEA	80	40	106	95	37	14.7234	0	0	0	0	0	0	0	0	0	0	0	0	0	0	0	0	0	0	0	0	0	0	0	0	0
9182273	2017-10-09	09:38:00	2	1	2	0	1		FIREWOOD+CHARCOAL				0	0	0	0		DIARRHOEA			100	80	37	16.4354	0	0	0	0	0	0	0	0	0	0	0	0	0	0	0	0	0	0	0	0	0	0	0	0	0
9182277	2017-10-09	10:15:00	2	1	2	1	1		CHARCOAL+GAS				0	0	0	0		COUGH/FEVER	110	70	164	96	38.4	16.609	0	0	0	0	0	0	0	0	0	0	0	0	0	0	0	0	0	0	0	0	0	0	0	0	0
9182278	2017-10-09	10:45:00	2	1	2	1	1		CHARCOAL				0	0	0	0		DIARRHOEA WITH BLOOD	90	50	95	87	37.1	14.4208	0	0	0	0	0	0	0	0	0	0	0	0	0	0	0	0	0	0	0	0	0	0	0	0	0
9182279	2017-10-09	10:56:00	2	3	2	1	1		CHARCOAL+GAS				0	0	0	0		FEVER/VOMITING	90	40	143	97	38.3	13.7241	0	0	0	0	0	0	0	0	0	0	0	0	0	0	0	0	0	0	0	0	0	0	0	0	0
9182280	2017-10-28	11:20:00	2	7	2	1	1		CHARCOAL				0	0	0	0		FEVER/RASH	90	50	90	98	35.9	14.8721	0	0	0	0	0	0	0	0	0	0	0	0	0	0	0	0	0	0	0	0	0	0	0	0	0
9182289	2017-10-09	16:30:00	2	8	2	0	1		CHARCOAL				0	0	0	0		ITCHY SCALP	100	50	98	84	35.7	14.8295	0	0	0	0	0	0	0	0	0	0	0	0	0	0	0	0	0	0	0	0	0	0	0	0	0
9182298	2017-10-09	20:30:00	2	1	2	0	1		CHARCOAL				0	1	0	0		FEVER	80	60	162	96	38.3		0	0	0	0	0	0	0	0	0	0	0	0	0	0	0	0	0	0	0	0	0	0	0	0	0
9182326	2017-10-10	12:58:00	2	1	2	1	1		CHARCOAL				0	1	0	0		FEVER/UPPER LIMB EDEMA			105	90	39.6	14.1967	0	0	0	0	0	0	0	0	0	0	0	0	0	0	0	0	0	0	0	0	0	0	0	0	0
9182340	2017-10-11	04:36:00	2	2	2	0	1	0	CHARCOAL	1	0	0	0	1	0	0		FEVER	120	40	91	41	38.5	94.9598	0	0	0	0	0	0	0	0	0	0	0	0	0	0	0	0	0	0	0	0	0	0	0	0	0
9182355	2017-10-11	10:32:00	2	3	2	0	1		CHARCOAL				0	1	0	0		PIMPLES ON BODY	100	80	127	98	35.5	15.7808	0	0	0	0	0	0	0	0	0	0	0	0	0	0	0	0	0	0	0	0	0	0	0	0	0
9182358	2017-10-11	11:08:00	2	6	2	0	1	0	CHARCOAL	0	0	0	0	1	0	0		HOT BODY/VOMITING/ABDOMINAL PAIN	100	70	132	98	37.6	12.8472	0	0	0	0	0	0	0	0	0	0	0	0	0	0	0	0	0	0	0	0	0	0	0	0	0
9182363	2017-10-11	12:25:00	2	1	2	0	1	0	CHARCOAL	1	1	1	0	1	0	0		HOT BODY/WEAKNESS	100	70	137	97	36.9	15.625	0	0	0	0	0	0	0	0	0	0	0	0	0	0	0	0	0	0	0	0	0	0	0	0	0
9182365	2017-10-11	13:22:00	2	7	2	1	1		CHARCOAL+GAS				0	0	0	0		INCREASED SUBMANDIBULAR GANGLION	100	80	98	100	35.9	14.8611	0	0	0	0	0	0	0	0	0	0	0	0	0	0	0	0	0	0	0	0	0	0	0	0	0
9182394	2017-10-12	11:51:00	2	1	2	0	1		CHARCOAL				0	1	0	0		DIARRHOEA			126	98	36.8	15.467	0	0	0	0	0	0	0	0	0	0	0	0	0	0	0	0	0	0	0	0	0	0	0	0	0
9182447	2017-10-13	20:03:00	2	2	2	1	1		CHARCOAL				0	1	0	0		FEVER	100	80	160	97	38.7	16.6297	0	0	0	0	0	0	0	0	0	0	0	0	0	0	0	0	0	0	0	0	0	0	0	0	0
9182453	2017-10-14	07:58:00	2	3	2	0	1		CHARCOAL				0	1	0	0		FEVER	100	80			38.6	11.0947	0	0	0	0	0	0	0	0	0	0	0	0	0	0	0	0	0	0	0	0	0	0	0	0	0
9182463	2017-10-14	11:43:00	2	1	2	1	1		CHARCOAL				0	1	0	0		DIARRHOEA	110	70	124	98	36.5	11.3622	0	0	0	0	0	0	0	0	0	0	0	0	0	0	0	0	0	0	0	0	0	0	0	0	0
9182502	2017-10-15	14:56:00	2	1	2	0	1		CHARCOAL				0	1	0	0		WATERY DIARRHOEA	100	80	123		37	13.1492	0	0	0	0	0	0	0	0	0	0	0	0	0	0	0	0	0	0	0	0	0	0	0	0	0
9182547	2017-10-16	09:05:00	2	2	2	0	1		CHARCOAL				0	0	0	0		PALLOR OF HAND PALMS	80	53			37.3	14.5312	0	0	0	0	0	0	0	0	0	0	0	0	0	0	0	0	0	0	0	0	0	0	0	0	0
9182571	2017-10-16	15:58:00	2	1	2	0	1	0	CHARCOAL	0	0	1	1	0	0	0		DYSPNOEA/FEVER	90	55			37.1		0	0	0	0	0	0	0	0	0	0	0	0	0	0	0	0	0	0	0	0	0	0	0	0	0
9182577	2017-10-16	17:38:00	2	2	2	0	1		CHARCOAL+ENERGY				0	0	0	0		FEVER/DIARRHOEA	100	60			36.2	26.3841	0	0	0	0	0	0	0	0	0	0	0	0	0	0	0	0	0	0	0	0	0	0	0	0	0
9182600	2017-10-17	08:34:00	2	8	2	0	1		CHARCOAL				0	0	0	0		DIARRHOEA/VOMITING	60	40	63		36.3	13.504	0	0	0	0	0	0	0	0	0	0	0	0	0	0	0	0	0	0	0	0	0	0	0	0	0
9182603	2017-10-17	08:57:00	2	3	2	1	1		CHARCOAL				0	0	0	0		MOUTH LESIONS	100	90	135		36	14.2495	0	0	0	0	0	0	0	0	0	0	0	0	0	0	0	0	0	0	0	0	0	0	0	0	0
9182625	2017-10-17	11:45:00	2	1	2	0	1		FIREWOOD				0	1	0	0		FEVER/FAINTING	110	90	120		39.7	17.9458	0	0	0	0	0	0	0	0	0	0	0	0	0	0	0	0	0	0	0	0	0	0	0	0	0
9182634	2017-10-17	16:09:00	2	1	2	0	1		CHARCOAL				0	1	0	0		FEVER/EDEMA			100		38.3	25.1953	0	0	0	0	0	0	0	0	0	0	0	0	0	0	0	0	0	0	0	0	0	0	0	0	0
9182648	2017-10-10	21:22:00	2	2	2	0	1						0	1	0	0		DIARRHOEA					37	137.153	0	0	0	0	0	0	0	0	0	0	0	0	0	0	0	0	0	0	0	0	0	0	0	0	0
9182712	2017-10-19	00:00:00	2	3	2	0	1		CHARCOAL				0	1	0	0		DIARRHOEA/VOMITING	90	50	141	99	34.9	17.0362	0	0	0	0	0	0	0	0	0	0	0	0	0	0	0	0	0	0	0	0	0	0	0	0	0
9182751	2017-10-10	16:37:00	2	1	2	0	1	0	CHARCOAL	1	0	0	0	1	0	0		FEVER			140	97	37.4	19.2308	0	0	0	0	0	0	0	0	0	0	0	0	0	0	0	0	0	0	0	0	0	0	0	0	0
9182764	2017-10-19	22:45:00	2	1	2	0	1		FIREWOOD+CHARCOAL				0	1	0	0		FEVER/FAINTING	60	40	138	97			0	0	0	0	0	0	0	0	0	0	0	0	0	0	0	0	0	0	0	0	0	0	0	0	0
9182793	2017-10-20	10:07:00	2	4	2	0	1		CHARCOAL				0	1	0	0		HOT BODY/WEAKNESS	100	75	179	99	36.9		0	0	0	0	0	0	0	0	0	0	0	0	0	0	0	0	0	0	0	0	0	0	0	0	0
9182801	2017-10-20	18:35:00	2	4	2	1	1		CHARCOAL				0	1	0	0		HOT BODY/NOT EATING WELL	100	80	149	99	37.2		0	0	0	0	0	0	0	0	0	0	0	0	0	0	0	0	0	0	0	0	0	0	0	0	0
9182806	2017-10-20	21:10:00	2	2	2	0	1		CHARCOAL				0	1	0	0		FEVER/COUGH	120	80	152	99	38.1	16.6933	0	0	0	0	0	0	0	0	0	0	0	0	0	0	0	0	0	0	0	0	0	0	0	0	0
9182808	2017-10-20	23:19:00	2	2	2	0	1	0	CHARCOAL	0	0	0	0	0	0	0		HOT BODY	110	80	147	95	38.4	16.403	0	0	0	0	0	0	0	0	0	0	0	0	0	0	0	0	0	0	0	0	0	0	0	0	0
9182845	2017-10-21	14:05:00	2	3	2	1	1		CHARCOAL				0	0	0	0		ABDOMINAL PAIN	100	80	125	98	36.1	16.901	1	0	0	0	0	0	0	0	0	0	0	0	0	0	0	0	0	0	0	0	0	0	0	0	0
9182852	2017-10-21	16:26:00	2	3	2	1	1		CHARCOAL				0	1	0	0		VOMITING	100	80	121	97	37	12.282	1	0	0	0	0	0	0	0	0	0	0	0	0	0	0	0	0	0	0	0	0	0	0	0	0
9182853	2017-10-21	16:34:00	2	5	2	1	1		CHARCOAL				0	1	0	0		FEVER	100	70	124	97	39.5	15.917	0	0	0	0	0	0	0	0	0	0	0	0	0	0	0	0	0	0	0	0	0	0	0	0	0
9182857	2017-10-21	17:29:00	2	1	2	0	1		CHARCOAL				0	1	0	0		FEVER			125	98	36.9	18.1787	0	0	0	0	0	0	0	0	0	0	0	0	0	0	0	0	0	0	0	0	0	0	0	0	0
9182866	2017-10-21	20:40:00	2	1	2	0	1	0	CHARCOAL	0	0	0	0	1	0	0		FEVER	100	40	170	99	38.1	11.3621	1	0	0	0	0	0	0	0	0	0	0	0	0	0	0	0	0	0	0	0	0	0	0	0	0
9182867	2017-10-21	21:34:00	2	7	2	1	1	0	CHARCOAL+ELECTRIC+GAS	1	0	0	0	1	0	0		HEADACHE	120	70	98	100	36.7	17.1325	0	0	0	0	0	0	0	0	0	0	0	0	0	0	0	0	0	0	0	0	0	0	0	0	0
9182883	2017-10-22	08:28:00	2	4	2	1	1		CHARCOAL				0	1	0	0		DIARRHOEA/VOMITING	70	40	162	97	36.6	10.68	0	0	0	0	0	0	0	0	0	0	0	0	0	0	0	0	0	0	0	0	0	0	0	0	0
9182884	2017-10-22	08:31:00	2	2	2	0	1		CHARCOAL				0	1	0	0		ACUTE DIARRHEA	100	50	128	97	35.6	15.917	0	0	0	0	0	0	0	0	0	0	0	0	0	0	0	0	0	0	0	0	0	0	0	0	0
9182893	2017-10-22	12:15:00	2	1	2	0	1	1	CHARCOAL	1	0	0	0	1	0	0		FEVER			135	96	38	16.25	0	0	0	0	0	0	0	0	0	0	0	0	0	0	0	0	0	0	0	0	0	0	0	0	0
9182898	2017-10-22	12:41:00	2	9	2	1	1	1	CHARCOAL	0	0	1	0	1	0	0		WATERY DIARRHOEA			110	69	37		0	0	0	0	0	0	0	0	0	0	0	0	0	0	0	0	0	0	0	0	0	0	0	0	0
9182903	2017-10-22	14:36:00	2	7	2	0	1	0	CHARCOAL	1	0	0	0	1	0	0		WATERY DIARRHOEA			110	98	36.3	12.46	0	0	0	0	0	0	0	0	0	0	0	0	0	0	0	0	0	0	0	0	0	0	0	0	0
9182908	2017-10-22	16:39:00	2	1	2	1	1	1	CHARCOAL	1	0	0	0	1	0	0		FEVER	80	50	31	76	36.8		0	0	0	0	0	0	0	0	0	0	0	0	0	0	0	0	0	0	0	0	0	0	0	0	0
9182918	2017-10-22	18:41:00	2	3	2	1	1	0	CHARCOAL	0	1	0	0	1	0	0		FEVER	100	60	159	96	38.1	12.9	0	0	0	0	0	0	0	0	0	0	0	0	0	0	0	0	0	0	0	0	0	0	0	0	0
9182937	2017-10-23	06:12:00	2	3	2	1	1	0	CHARCOAL	1	0	1	0	1	0	0		FEVER/COUGH	100	60	169	95	39.1	16.276	0	0	0	0	0	0	0	0	0	0	0	0	0	0	0	0	0	0	0	0	0	0	0	0	0
9182977	2017-10-23	16:44:00	2	1	2	0	1		CHARCOAL				0	0	0	0		FEVER/DIARRHOEA	120	60	143	95	38.1	13.8504	0	0	0	0	0	0	0	0	0	0	0	0	0	0	0	0	0	0	0	0	0	0	0	0	0
9182978	2017-10-23	17:13:00	2	9	2	0	1		CHARCOAL				0	0	0	0		ABDOMINAL PAIN	110	50	90	100	36.5	15.7707	0	0	0	0	0	0	0	0	0	0	0	0	0	0	0	0	0	0	0	0	0	0	0	0	0
9182982	2017-10-23	19:32:00	2	2	2	1	1		CHARCOAL+GAS				0	0	0	0		FEVER							0	0	0	0	0	0	0	0	0	0	0	0	0	0	0	0	0	0	0	0	0	0	0	0	0
9182995	2017-10-24	06:17:00	2	4	2	0	1		CHARCOAL				0	0	0	0		DIARRHOEA			128	87	35		0	0	0	0	0	0	0	0	0	0	0	0	0	0	0	0	0	0	0	0	0	0	0	0	0
91821003	2017-10-24	08:56:00	2	3	2	1	1		CHARCOAL				0	0	0	0		CONVULSIONS/FEVER/DIARRHOEA			163	91	39.6	10.0263	1	0	0	0	0	0	0	0	0	0	0	0	0	0	0	0	0	0	0	0	0	0	0	0	0
91821025	2017-10-24	12:59:00	2	1	2	0	1		CHARCOAL				0	1	0	0		FEVER			143	99	36.7	15.1796	0	0	0	0	0	0	0	0	0	0	0	0	0	0	0	0	0	0	0	0	0	0	0	0	0
91821027	2017-10-24	15:02:00	2	1	2	1	1		CHARCOAL				0	1	0	0		FEVER			101	92	37.9	15.0122	0	0	0	0	0	0	0	0	0	0	0	0	0	0	0	0	0	0	0	0	0	0	0	0	0
91821033	2017-10-24	18:28:00	2	2	2	1	1		CHARCOAL				0	0	0	0		COUGH/DIARRHOEA			112	98	36.5	16.1816	0	0	0	0	0	0	0	0	0	0	0	0	0	0	0	0	0	0	0	0	0	0	0	0	0
91821043	2017-10-24	22:40:00	2	6	2	1	1		CHARCOAL				0	1	0	0		HOT BODY/WEAKNESS	139	90	141	94	39.6	13.8574	0	0	0	0	0	0	0	0	0	0	0	0	0	0	0	0	0	0	0	0	0	0	0	0	0
91821050	2017-10-25	05:59:00	2	5	2	1	1	0	CHARCOAL	1	1	0	0	1	0	0		HOT BODY/SORE THROAT	135	90	99	99	38.3	12.0392	0	0	0	0	0	0	0	0	0	0	0	0	0	0	0	0	0	0	0	0	0	0	0	0	0
91821098	2017-10-26	05:30:00	2	1	2	0	1	1	CHARCOAL	0	1	0	0	1	0	0		DIARRHOEA			130	99	36.6	16.8663	0	0	0	0	0	0	0	0	0	0	0	0	0	0	0	0	0	0	0	0	0	0	0	0	0
91821120	2017-10-26	12:54:00	2	5	2	0	1		CHARCOAL+GAS				0	1	0	0		FEVER FOR 1 MONTH	159	90	89	99	36.7	14.3667	0	0	0	0	0	0	0	0	0	0	0	0	0	0	0	0	0	0	0	0	0	0	0	0	0
91821121	2017-10-26	12:54:00	2	2	2	1	1		CHARCOAL				0	0	0	0		THROAT SWELLING/DIARRHOEA	119	80	110	99	37.7	30.9917	0	0	0	0	0	0	0	0	0	0	0	0	0	0	0	0	0	0	0	0	0	0	0	0	0
91821175	2017-10-27	13:59:00	2	6	2	1	1	0	CHARCOAL	1	0	0	0	1	0	0		FEVER	80	70	113	99	35.7	13.0612	0	0	0	0	0	0	0	0	0	0	0	0	0	0	0	0	0	0	0	0	0	0	0	0	0
91821192	2017-10-27	21:26:00	2	4	2	0	1		CHARCOAL				0	1	0	0		VOMITING/WEAKNESS/COUGH	110	80	159	99	35.8	19.0632	0	0	0	0	0	0	0	0	0	0	0	0	0	0	0	0	0	0	0	0	0	0	0	0	0
91821233	2017-10-28	20:36:00	2	6	2	0	1		CHARCOAL				0	0	0	0		FEVER			169	99	39.3	13.1013	0	0	0	0	0	0	0	0	0	0	0	0	0	0	0	0	0	0	0	0	0	0	0	0	0
91821236	2017-10-28	21:11:00	2	4	2	1	1		CHARCOAL				0	1	0	0		FEVER			138	98	37.3	14.5125	0	0	0	0	0	0	0	0	0	0	0	0	0	0	0	0	0	0	0	0	0	0	0	0	0
91821264	2017-10-29	14:50:00	2	6	2	1	1		CHARCOAL				0	0	0	0		FEVER			129	97	38.3	13.6603	0	0	0	0	0	0	0	0	0	0	0	0	0	0	0	0	0	0	0	0	0	0	0	0	0
91821281	2017-10-30	06:31:00	2	1	2	0	1		CHARCOAL				0	0	0	0		FEVER/DIARRHOEA			120	98	36.4	17.8213	0	0	0	0	0	0	0	0	0	0	0	0	0	0	0	0	0	0	0	0	0	0	0	0	0
91821290	2017-10-30	09:03:00	2	5	2	1	1		CHARCOAL+ELECTRICITY				0	0	0	0		FEVER/COUGH	120	80	99	100	35.9	15.6202	0	0	0	0	0	0	0	0	0	0	0	0	0	0	0	0	0	0	0	0	0	0	0	0	0
91821305	2017-10-30	11:57:00	2	2	2	0	1		CHARCOAL				0	0	0	0		FEVER/DIARRHOEA	80	50	122	98	37.8	17.3074	0	0	0	0	0	0	0	0	0	0	0	0	0	0	0	0	0	0	0	0	0	0	0	0	0
91821324	2017-10-30	22:00:00	2	4	2	0	1	1	CHARCOAL	0	1	0	0	1	0	0		CONVULSIONS	130	80	111	99	36.6	14.4469	0	0	0	0	0	0	0	0	0	0	0	0	0	0	0	0	0	0	0	0	0	0	0	0	0
918268	2017-10-03	09:04:00	2	1	2	1	1	0		0	0	0						HOT BODY	125	80	143	83	36.2	18.125	0	0	0	0	0	0	0	0	0	0	0	0	0	0	0	0	0	0	0	0	0	0	0	0	0
9182253	2017-10-08	19:40:00	2	3	2	1	1	0	CHARCOAL	1	0	0						FEVER/COUGH	100	50	109	99	37	14.4175	0	0	0	0	0	0	0	0	0	0	0	0	0	0	0	0	0	0	0	0	0	0	0	0	0
9182534	2017-10-16	05:56:00	2	1	2	0	1		CHARCOAL									FEVER/CONVULSIONS	90	50	120		37.5	17.0898	0	0	0	0	0	0	0	0	0	0	0	0	0	0	0	0	0	0	0	0	0	0	0	0	0
9182728	2017-10-19	08:32:00	2	1	2	0	1	0	CHARCOAL	1	0	0						FEVER			157	94	37.4	13.587	0	0	0	0	0	0	0	0	0	0	0	0	0	0	0	0	0	0	0	0	0	0	0	0	0
918227	2017-10-01	10:07:00	2	1	2	1	1		CHARCOAL+GAS									ARM PAIN	90	60	96	86	36.7	16.1938	0	0	0	0	0	1	0	0	0	0	0	0	0	0	0	0	0	0	0	0	0	0	0	0	0
918267	2017-10-03	08:41:00	2	1	2	0	1		CHARCOAL									LEG PAIN	100	80	150	90	36.5	17.1288	0	1	0	0	0	0	0	0	0	0	0	0	0	0	0	0	0	0	0	0	0	0	0	0	0
9182114	2017-10-04	15:03:00	2	9	2	0	1		CHARCOAL									RIGHT ELBOW PAIN	95	54	93		36.9	14.814	0	0	0	0	0	0	1	0	0	0	0	0	0	0	0	0	0	0	0	0	0	0	0	0	0
9182125	2017-10-04	20:25:00	2	4	2	0	1	0	CHARCOAL	0	0	0						FOREIGN BODY IN NOSTRIL	110	80	100	80	35.4	16.5986	0	0	0	0	0	0	0	0	0	0	0	1	0	0	0	0	0	0	0	0	0	0	0	0	0
9182200	2017-10-07	17:00:00	2	5	2	0	1		CHARCOAL									FOREARM PAIN	110	70	134	93	36.9	14.7846	0	0	0	0	0	0	0	0	0	0	0	0	0	0	0	0	0	1	0	0	0	0	0	0	0
9182372	2017-10-11	18:14:00	2	8	2	0	1		CHARCOAL									WOUND	100	80	109	99	36.8	14.2067	0	0	0	0	0	0	0	0	0	0	0	1	0	0	0	0	0	0	0	0	0	0	0	0	0
9182734	2017-10-19	09:32:00	2	7	2	0	1	1	CHARCOAL	1	0	1						ELBOW TRAUMA	100	80	103	99	36.4	16.5289	0	0	0	0	0	0	1	0	0	0	0	0	0	0	0	0	0	0	0	0	0	0	0	0	0
9182748	2017-10-19	14:40:00	2	2	2	1	1		CHARCOAL									KNEE TRAUMA	100	90	135	90	37.1	17.5717	0	0	0	1	0	0	0	0	0	0	0	0	0	0	0	0	0	0	0	0	0	0	0	0	0
9182757	2017-10-19	17:38:00	2	1	2	0	1	0	CHARCOAL	1	0	0						ROOF OF MOUTH WOUND	100	70	120	99	36.2	16.3593	0	0	0	0	0	0	0	0	0	0	0	1	0	0	0	0	0	0	0	0	0	0	0	0	0
9182821	2017-10-21	09:05:00	2	6	2	0	1		CHARCOAL									LEFT ARM PAIN	120	80	124	99	36	15.9078	0	0	0	0	0	0	0	0	0	0	0	0	0	0	0	1	0	0	0	0	0	0	0	0	0
91821046	2017-10-24	23:52:00	2	1	2	1	1		CHARCOAL									ITCHING/PIMPLES OVER BODY AFTER TAKING FENOX	120	96	190	88	37.1	14.6611	0	0	0	0	0	0	0	0	0	0	0	0	0	0	0	0	0	0	0	0	0	0	0	0	0
91821075	2017-10-25	11:30:00	2	9	2	0	1	0	CHARCOAL	0	1	0						LEG PAIN			113	99	37.4		0	0	0	0	0	0	0	0	0	0	0	0	0	0	0	0	0	0	1	0	0	0	0	0	0
91821122	2017-10-26	13:42:00	2	7	2	0	1		CHARCOAL									FALL	140	80	100	99	36.1	14.7222	0	0	0	0	0	0	0	0	0	0	0	0	0	0	0	1	0	0	0	0	0	0	0	0	0
91821191	2017-10-27	21:20:00	2	5	2	1	1		CHARCOAL									PAIN	110	80	98	99	36.5	19.0177	0	0	0	0	1	1	0	0	0	0	0	0	0	0	0	0	0	0	0	0	0	0	0	0	0
918266	2017-10-03	08:12:00	2	5	2	1	1		CHARCOAL									FEVER/COUGH	100	80	130	90	36.6		0	0	0	0	0	0	0	0	0	0	0	0	0	0	0	0	0	0	0	0	0	0	0	0	0
918284	2017-10-03	22:00:00	2	3	2	0	1	0	GAS	1	0	0						FEVER	90	50	99	95	37.3	15.8593	0	0	0	0	0	0	0	0	0	0	0	0	0	0	0	0	0	0	0	0	0	0	0	0	0
9182301	2017-10-10	05:33:00	2	3	2	1	1	0	CHARCOAL	0	0	0						FEVER/COUGH	100	80	159	84	39	13.0748	0	0	0	0	0	0	0	0	0	0	0	0	0	0	0	0	0	0	0	0	0	0	0	0	0
9182315	2017-10-10	08:52:00	2	1	2	0	1		CHARCOAL									FEVER/CONSTIPATION			153	94	37.1	15.7791	0	0	0	0	0	0	0	0	0	0	0	0	0	0	0	0	0	0	0	0	0	0	0	0	0
9182378	2017-10-12	05:23:00	2	1	2	1	1											FEVER/COUGH	80	40	155	95	37.7	17.1875	0	0	0	0	0	0	0	0	0	0	0	0	0	0	0	0	0	0	0	0	0	0	0	0	0
9182703	2017-10-18	18:02:00	2	2	2	1	1		CHARCOAL									COUGH/HOT	129	99	142	99	38.4	14.6025	0	0	0	0	0	0	0	0	0	0	0	0	0	0	0	0	0	0	0	0	0	0	0	0	0
91821078	2017-10-25	12:30:00	2	6	2	0	1		CHARCOAL									COUGH	100	68	98	77	39.9	14.6103	0	0	0	0	0	0	0	0	0	0	0	0	0	0	0	0	0	0	0	0	0	0	0	0	0
91821084	2017-10-25	15:01:00	2	4	2	0	1		CHARCOAL									HOT BODY/VOMITING	100	72	130	99	37.7	15.1496	0	0	0	0	0	0	0	0	0	0	0	0	0	0	0	0	0	0	0	0	0	0	0	0	0
918269	2017-10-02	09:57:00	2	1	2	0	1		CHARCOAL									DIARRHOEA	99	80	134	93	36.7		0	0	0	0	0	0	0	0	0	0	0	0	0	0	0	0	0	0	0	0	0	0	0	0	0
9182762	2017-10-19	22:11:00	2	3	2	0	1	0	CHARCOAL	0	1	1						DIARRHOEA/VOMITING	100	80	141	96	37.6	14.1822	0	0	0	0	0	0	0	0	0	0	0	0	0	0	0	0	0	0	0	0	0	0	0	0	0
9182198	2017-10-07	07:26:00	2	1	2	0	1		FIREWOOD									DIFFICULTY BREATHING	100	70	144	71	32.3	21.3599	0	0	0	0	0	0	0	0	0	0	0	0	0	0	0	0	0	0	0	0	0	0	0	0	0
9182849	2017-10-21	16:02:00	2	4	2	1	1		CHARCOAL									VOMITING	100	60	121	98	35.8	15.1299	1	0	0	0	0	0	0	0	0	0	0	0	0	0	0	0	0	0	0	0	0	0	0	0	0
9182886	2017-10-22	09:23:00	2	1	2	1	1		CHARCOAL									DIARRHOEA			88	85	37.9		0	0	0	0	0	0	0	0	0	0	0	0	0	0	0	0	0	0	0	0	0	0	0	0	0
9182983	2017-10-23	19:42:00	2	2	2	0	1		CHARCOAL									FEVER	95	60	170	97	38.4	17.7038	0	0	0	0	0	0	0	0	0	0	0	0	0	0	0	0	0	0	0	0	0	0	0	0	0
91821085	2017-10-25	17:03:00	2	1	2	0	1											DIARRHOEA	100	80	150	82	38	15.1644	0	0	0	0	0	0	0	0	0	0	0	0	0	0	0	0	0	0	0	0	0	0	0	0	0
91821171	2017-10-27	12:58:00	2	1	2	1	1		CHARCOAL									DIARRHOEA			147	97	38	17.0667	0	0	0	0	0	0	0	0	0	0	0	0	0	0	0	0	0	0	0	0	0	0	0	0	0
91821221	2017-10-28	14:36:00	2	3	2	1	1		CHARCOAL									FEVER	80	60	136	98	38.6	15.9167	0	0	0	0	0	0	0	0	0	0	0	0	0	0	0	0	0	0	0	0	0	0	0	0	0
91821269	2017-10-29	15:12:00	2	1	2	0	1		CHARCOAL									VOMITING	100	80	177	98	38.1	12.6288	0	0	0	0	0	0	0	0	0	0	0	0	0	0	0	0	0	0	0	0	0	0	0	0	0
91821312	2017-10-30	15:10:00	2	2	2	1	1		CHARCOAL									FEVER/DIARRHOEA	100	70	123	100	36	12.8772	0	0	0	0	0	0	0	0	0	0	0	0	0	0	0	0	0	0	0	0	0	0	0	0	0
9182706	2017-10-18	19:42:00	2	11	3	0	1		CHARCOAL				0	1	1	0		FEBRILE SYNDROME				99	37.7	15.191	0	0	0	0	0	0	0	0	0	0	0	0	0	0	0	0	0	0	0	0	0	0	0	0	0
240077	2017-04-03	17:10:00	2	16	3	0	1	0	CHARCOAL	0	0	0	0	1	1	0		BUBBLES (HEAT RASH??)/PRURITUS	126	83	84	97	37.1	18.4022	0	0	0	0	0	0	0	0	0	0	0	0	0	0	0	0	0	0	0	0	0	0	0	0	0
240153	2017-04-07	12:30:00	2	12	3	0	1	0	CHARCOAL	0	0	0	0	1	1	0		LEFT SHOULDER PAIN	110	77	108	97	36.4	14.5355	0	0	0	0	0	0	0	0	0	0	0	0	1	0	0	0	0	0	0	0	0	0	0	0	0
240154	2017-04-07	12:35:00	2	13	3	0	1	0	CHARCOAL	0	0	0	0	1	1	0		ITCHY LEFT FOOT	124	82	63	99	35.8	15.2027	0	0	0	0	0	0	0	0	0	0	0	0	0	0	0	0	0	0	0	0	0	0	0	0	0
260072	2017-04-04	18:59:00	2	14	3	0	1	0	FIREWOOD	0	0	0	0	1	1	0		CONTUSION LEFT ARM	107	66	127	98	37	17.8821	0	0	0	0	0	0	0	0	0	0	0	0	0	1	0	0	0	0	0	0	0	0	0	0	0
260246	2017-04-12	08:05:00	2	18	3	0	1	0	CHARCOAL	0	0	0	0	1	1	0		RIGHT WRIST PAIN	123	75	76	99	36.7	22.8243	0	0	0	0	0	1	0	0	0	0	0	0	0	0	0	0	0	0	0	0	0	0	0	0	0
260689	2017-04-26	16:48:00	2	18	3	0	1	0	CHARCOAL	0	1	0	0	0	1	0		KNEE PAIN	109	68	68	98	36.3	18.1312	0	0	0	1	0	0	0	0	0	0	0	0	0	0	0	0	0	0	0	0	0	0	0	0	0
918264	2017-10-03	17:37:00	2	19	3	0	1	0	CHARCOAL	0	1	0	0	1	1	0		LEFT HAND PAIN	140	91	83	97	36.3	23.7118	0	0	0	0	0	0	0	0	0	0	0	0	0	0	0	1	0	0	0	0	0	0	0	0	0
9182374	2017-10-11	19:46:00	2	18	3	0	1	0	CHARCOAL	0	1	0	0	1	1	0		LEFT ELBOW PAIN	109	78	88	98	36.1	22.9421	0	0	0	0	0	0	0	0	0	0	0	0	0	0	0	0	0	1	0	0	0	0	0	0	0
91821005	2017-10-24	09:11:00	2	11	3	0	1		CHARCOAL				0	0	1	0		FALL			100	96	36.4	14.492	0	0	0	0	0	0	0	0	0	0	0	0	0	0	1	0	0	0	0	0	0	0	0	0	0
91821326	2017-10-31	05:20:00	2	10	3	0	1	1	FIREWOOD	0	1	0	0	1	1	0		FALL	130	80	118	99	36.6		0	1	0	0	0	0	0	0	0	0	0	0	0	0	0	0	0	0	0	0	0	0	0	0	0
9182630	2017-10-17	14:01:00	2	11	3	0	1		CHARCOAL				0	0	1	0		FEVER/COUGH			150		39.4	18.1077	0	0	0	0	0	0	0	0	0	0	0	0	0	0	0	0	0	0	0	0	0	0	0	0	0
240020	2017-04-01	16:14:00	2	14	3	0	1	0	CHARCOAL+ELECTRIC OVEN	0	0	0	0	0	1	0		DIFFICULTY BREATHING	111	70	108	94	35.6	22.2715	0	0	0	0	0	0	0	0	0	0	0	0	0	0	0	0	0	0	0	0	0	0	0	0	0
240436	2017-04-22	05:00:00	2	12	3	0	1	0	CHARCOAL	0	0	0	0	1	1	0		DIFFICULTY BREATHING	98	60	105	99	35.8	17.5455	0	0	0	0	0	0	0	0	0	0	0	0	0	0	0	0	0	0	0	0	0	0	0	0	0
240554	2017-04-30		2	10	3	1	1	0	CHARCOAL	0	0	0	0	0	1	0		DIFFICULTY BREATHING			142	94	36.5		0	0	0	0	0	0	0	0	0	0	0	0	0	0	0	0	0	0	0	0	0	0	0	0	0
260160	2017-04-08	14:55:00	2	11	3	1	1	1	CHARCOAL	0	0	0	0	1	1	0		DIFFICULTY BREATHING	114	94	139	94	37	15.5043	0	0	0	0	0	0	0	0	0	0	0	0	0	0	0	0	0	0	0	0	0	0	0	0	0
260297	2017-04-13	20:24:00	2	13	3	0	1	0	CHARCOAL	0	0	0	0	0	1	0		DIFFICULTY BREATHING	106	81	129	94	37	14.9938	0	0	0	0	0	0	0	0	0	0	0	0	0	0	0	0	0	0	0	0	0	0	0	0	0
260567	2017-04-23	15:45:00	2	12	3	1	1	0	CHARCOAL	0	0	0	0	1	1	0		FEVER	96	58	91	90	35.1	21.2312	0	0	0	0	0	0	0	0	0	0	0	0	0	0	0	0	0	0	0	0	0	0	0	0	0
9182309	2017-10-10	09:02:00	2	18	3	1	1	0	CHARCOAL	0	0	0	0	1	1	0		STOMACH PAIN/COUGH	90	63	136	98	36.5	18.8444	0	0	0	0	0	0	0	0	0	0	0	0	0	0	0	0	0	0	0	0	0	0	0	0	0
9182912	2017-10-22	17:04:00	2	19	3	0	1	1	CHARCOAL	0	0	0	0	1	1	0		ASTHMATIC	114	74	73	98	35.8	18.1001	0	0	0	0	0	0	0	0	0	0	0	0	0	0	0	0	0	0	0	0	0	0	0	0	0
260253	2017-04-12	09:35:00	2	17	3	1	1	0	CHARCOAL	0	0	0	0	1	1	0		KNEE PAIN	113	69	67	99	36.9	21.3264	0	0	0	0	0	0	0	0	0	0	0	0	0	0	0	0	0	0	0	0	0	0	0	0	0
240439	2017-04-22	07:12:00	2	16	3	1	1	0	CHARCOAL	0	0	0	0	1	1	0			111	66	74	99	36.7	27.8222	0	0	0	0	0	0	0	0	0	0	0	0	0	0	0	0	0	0	0	0	0	0	0	0	0
918248	2017-10-03	08:20:00	2	18	3	1	1		CHARCOAL				0	0	1	0		EARACHE/LOSS OF HEARING	122	78	87	98	36.71	25.3906	0	0	0	0	0	0	0	0	0	0	0	0	0	0	0	0	0	0	0	0	0	0	0	0	0
9182566	2017-10-16	13:18:00	2	16	3	1	1	0	GAS+CHARCOAL	0	0	0	0	0	1	0		STOMACH PAIN	110	73	85	98	35.8	24.0578	0	0	0	0	0	0	0	0	0	0	0	0	0	0	0	0	0	0	0	0	0	0	0	0	0
260676	2017-04-24	05:59:00	2	18	3	0	1	0	CHARCOAL	0	1	0	0	1	0	0		INCREASED ABDOMINAL VOLUME	167	91	72	89	35.6	17.5383	0	0	0	0	0	0	0	0	0	0	0	0	0	0	0	0	0	0	0	0	0	0	0	0	0
240333	2017-04-13	13:10:00	2	17	3	1	1	0	CHARCOAL	0	0	0	0	1	1	0		FEVER	79	44	164	98	39.9	19.4728	0	0	0	0	0	0	0	0	0	0	0	0	0	0	0	0	0	0	0	0	0	0	0	0	0
240449	2017-04-23	09:55:00	2	11	3	0	1	0	CHARCOAL	0	0	0	0	0	1	0		FEVER	91	65	89	98	35.2	16.32	0	0	0	0	0	0	0	0	0	0	0	0	0	0	0	0	0	0	0	0	0	0	0	0	0
260566	2017-04-23	15:55:00	2	17	3	0	1	0	CHARCOAL	0	0	0	0	0	1	0		DIARRHOEA	101	72	114	97	35.6	18.4972	0	0	0	0	0	0	0	0	0	0	0	0	0	0	0	0	0	0	0	0	0	0	0	0	0
9182143	2017-10-05	11:38:00	2	15	3	1	1	0	CHARCOAL	0	0	0	0	1	1	0		HEADACHE/FEVER	117	72	111	99	35.2	21.0667	0	0	0	0	0	0	0	0	0	0	0	0	0	0	0	0	0	0	0	0	0	0	0	0	0
240518	2017-04-25	12:59:00	2	10	3	1	1	0	CHARCOAL	0	1	0	0	1	0	0		STOMACH ACHE	127	91	76	91	36.2	14.5918	0	0	0	0	0	0	0	0	0	0	0	0	0	0	0	0	0	0	0	0	0	0	0	0	0
260050	2017-04-04	09:21:00	2	16	3	1	1	0	CHARCOAL	0	0	0	0	1	0	0		ABDOMINAL CRAMPS	114	79	83	98	36.4	19.4805	0	0	0	0	0	0	0	0	0	0	0	0	0	0	0	0	0	0	0	0	0	0	0	0	0
260090	2017-04-05	19:50:00	2	13	3	0	1	0	CHARCOAL	0	0	0	0	1	0	0		FEVER	107	75	140	98	37.4	14.0833	0	0	0	0	0	0	0	0	0	0	0	0	0	0	0	0	0	0	0	0	0	0	0	0	0
260124	2017-04-06	22:10:00	2	19	3	1	1	0	CHARCOAL+FIREWOOD	0	0	0	0	1	0	0		ABDOMINAL PAIN	131	83	87	98	35.4	23.1008	0	0	0	0	0	0	0	0	0	0	0	0	0	0	0	0	0	0	0	0	0	0	0	0	0
260219	2017-04-06	14:31:00	2	19	3	1	4	0	ELECTRICITY	0	0	0	0	1	0	0		HEADACHE/NASAL CONGESTION	101	72	80	99	37.7	22.2222	0	0	0	0	0	0	0	0	0	0	0	0	0	0	0	0	0	0	0	0	0	0	0	0	0
260290	2017-04-12		2	10	3	0	1	0	CHARCOAL+FIREWOOD	0	0	0	0	1	0	0		DIFFICULTY BREATHING/INCREASED ABDOMINAL VOLUME	89	67	106	76	36.9	7.48859	0	0	0	0	0	0	0	0	0	0	0	0	0	0	0	0	0	0	0	0	0	0	0	0	0
260344	2017-04-15	15:00:00	2	16	3	1	1	0	CHARCOAL	0	0	0	0	0	0	0		HEADACHE	110	65	105	99	36.7	17.6674	0	0	0	0	0	0	0	0	0	0	0	0	0	0	0	0	0	0	0	0	0	0	0	0	0
260429	2017-04-19	17:57:00	2	13	3	1	1	0	CHARCOAL	0	0	0	0	1	0	0		ABDOMINAL PAIN	99	65	77	96	36	18.3375	0	0	0	0	0	0	0	0	0	0	0	0	0	0	0	0	0	0	0	0	0	0	0	0	0
260457	2017-04-20	06:55:00	2	10	3	1	1	0	CHARCOAL	0	0	0	0	1	0	0		BODY ACHE	110	74	136	99	37	18.595	0	0	0	0	0	0	0	0	0	0	0	0	0	0	0	0	0	0	0	0	0	0	0	0	0
260624	2017-04-28	12:30:00	2	19	3	0	1	0	CHARCOAL	0	0	0	0	1	0	0		CHEST PAIN	130	84	73	94	35.8	18.1764	0	0	0	0	0	0	0	0	0	0	0	0	0	0	0	0	0	0	0	0	0	0	0	0	0
260657	2017-04-22	11:10:00	2	18	3	1	1	0	CHARCOAL	0	0	0	0	1	0	0		WEAKNESS	127	80	90	97	37	21.1194	0	0	0	0	0	0	0	0	0	0	0	0	0	0	0	0	0	0	0	0	0	0	0	0	0
918243	2017-10-02	18:49:00	2	18	3	0	1	0	CHARCOAL	0	0	0	0	1	0	0		FEVER	125	77	73	99	37.3	18.2137	0	0	0	0	0	0	0	0	0	0	0	0	0	0	0	0	0	0	0	0	0	0	0	0	0
9182210	2017-10-07	10:27:00	2	19	3	1	1	0	CHARCOAL	0	1	0	0	1	0	0		STOMACH ACHE	123	62	96	97	36.7	24.0892	0	0	0	0	0	0	0	0	0	0	0	0	0	0	0	0	0	0	0	0	0	0	0	0	0
9182671	2017-10-18	08:44:00	2	17	3	1	1		CHARCOAL				0	1	0	0		FEVER	124	68	93	99	37.9	24.9403	0	0	0	0	0	0	0	0	0	0	0	0	0	0	0	0	0	0	0	0	0	0	0	0	0
9182774	2017-10-20	08:33:00	2	13	3	1	1		CHARCOAL				0	1	0	0		HEADACHE	99	57	95	99	35.8	17.503	1	0	0	0	0	0	0	0	0	0	0	0	0	0	0	0	0	0	0	0	0	0	0	0	0
9182992	2017-10-24	05:44:00	2	18	3	0	1		CHARCOAL				0	1	0	0		HEADACHE	118	61	53	97	36.1	21.3786	0	0	0	0	0	0	0	0	0	0	0	0	0	0	0	0	0	0	0	0	0	0	0	0	0
91821026	2017-10-24	14:40:00	2	10	3	1	1		CHARCOAL				0	0	0	0		FEVER			100	99	38.4	10.9569	0	0	0	0	0	0	0	0	0	0	0	0	0	0	0	0	0	0	0	0	0	0	0	0	0
91821082	2017-10-25	14:28:00	2	15	3	0	1		CHARCOAL				0	1	0	0		HEADACHE	115	81	136	99	39.8	18.2555	0	0	0	0	0	0	0	0	0	0	0	0	0	0	0	0	0	0	0	0	0	0	0	0	0
91821146	2017-10-27	07:30:00	2	19	3	1	1	0	CHARCOAL	1	0	0	0	1	0	0		HEADACHE	97	64	92		37.3	21.0176	0	0	0	0	0	0	0	0	0	0	0	0	0	0	0	0	0	0	0	0	0	0	0	0	0
91821156	2017-10-27	09:00:00	2	18	3	1	1	0	CHARCOAL	1	0	0	0	1	0	0		ABDOMINAL PAIN	114	72	107		37.9	24.308	0	0	0	0	0	0	0	0	0	0	0	0	0	0	0	0	0	0	0	0	0	0	0	0	0
91821177	2017-10-27	14:26:00	2	18	3	1	1		CHARCOAL				0	0	0	0		HEADACHE	108	67	67	99	36.2	31.5652	0	0	0	0	0	0	0	0	0	0	0	0	0	0	0	0	0	0	0	0	0	0	0	0	0
91821299	2017-10-30	10:18:00	2	12	3	1	1	0	CHARCOAL	0	0	0	0	0	0	0		FEVER/HEADACHE					35.9	14.5985	0	0	0	0	0	0	0	0	0	0	0	0	0	0	0	0	0	0	0	0	0	0	0	0	0
240236	2017-04-08	01:03:00	2	19	3	1	1	0	CHARCOAL	0	0	0	0	1	0	0		BLEEDING AFTER AMENORRHOEA FOR 2 MONTHS	127	71	100	91	36.8	28.9844	0	0	0	0	0	0	0	0	0	0	0	0	0	0	0	0	0	0	0	0	0	0	0	0	0
240339	2017-04-13	08:20:00	2	18	3	1	1	0	CHARCOAL	0	0	0	0	1	0	0		ITCH/BLEEDING ON FACE	119	77	104	98	36.6	17.4667	0	0	0	0	0	0	0	0	0	0	0	0	0	0	0	0	0	0	0	0	0	0	0	0	0
260291	2017-04-12	20:35:00	2	16	3	1	1	0	CHARCOAL	0	0	0	0	1	0	0		INCOHERENT SPEECH/REFUSING FOOD	121	78	98	99	36.2	17.2194	0	0	0	0	0	0	0	0	0	0	0	0	0	0	0	0	0	0	0	0	0	0	0	0	0
260529	2017-04-20	07:10:00	2	16	3	1	1	0	CHARCOAL	0	0	0	0	1	0	0		ALTERED BEHAVIOUR	119	87	91	99	36.6	16.4581	0	0	0	0	0	0	0	0	0	0	0	0	0	0	0	0	0	0	0	0	0	0	0	0	0
260598	2017-04-27	00:12:00	2	19	3	1	1	0	FIREWOOD	0	0	0	0	1	0	0		DRUG INTOXICATION	129	74	98	98	37	23.0224	0	0	0	0	0	0	0	0	0	0	0	0	0	0	0	0	0	0	0	0	0	0	0	0	0
240008	2017-04-01	12:11:00	2	15	3	1	1	0	CHARCOAL+FIREWOOD	0	0	0	0	1	0	0		PAIN IN THE LEFT ELBOW	129	80	90	89	35.9	18.7788	0	0	0	0	0	0	0	0	0	0	0	0	0	0	1	0	0	0	0	0	0	0	0	0	0
240012	2017-04-01	11:20:00	2	14	3	1	1	0	CHARCOAL+FIREWOOD	0	0	0	0	0	0	0		RIGHT KNEE PAIN	144	56	87	99	36.6	20.5457	0	0	0	1	0	0	0	0	0	0	0	0	0	0	0	0	0	0	0	0	0	0	0	0	0
240045	2017-04-01	13:50:00	2	10	3	0	1	0	CHARCOAL	0	0	0	0	0	0	0		PAIN AND LIMITATION MOBILIZING MANDIBULAR	103	77	114	99	35.7	14.348	0	0	0	0	0	0	0	0	0	0	0	1	0	0	0	0	0	0	0	0	0	0	0	0	0
240063	2017-04-03	16:20:00	2	11	3	1	1	0	CHARCOAL	0	0	0	0	1	0	0		HEADACHE	123	64	92	92	36.6	17.9528	0	0	0	0	0	0	0	0	0	0	1	0	0	0	0	0	0	0	0	0	0	0	0	0	0
240093	2017-04-04	22:34:00	2	18	3	0	1	0		0	0	0	0	1	0	0		LEFT EAR PAIN	121	87	82	99	36.2	18.7328	0	0	0	0	0	0	0	0	0	0	0	1	0	0	0	0	0	0	0	0	0	0	0	0	0
240100	2017-04-05	14:10:00	2	15	3	0	1	0	CHARCOAL	0	0	0	0	1	0	0		RIGHT FOREARM/WRIST PAIN	98	65	99	98	35.5	18.9273	0	0	0	0	0	0	0	1	0	0	0	0	0	0	0	0	0	0	0	0	0	0	0	0	0
240102	2017-04-05	14:30:00	2	11	3	0	1	0	CHARCOAL	0	0	0	0	1	0	0		RIGHT WRIST PAIN	105	68	72	72	36.9	19.4406	0	0	0	0	0	0	0	0	0	0	0	0	0	1	0	0	0	0	0	0	0	0	0	0	0
240112	2017-04-05		2	16	3	0	1	0	CHARCOAL	0	0	0	0	1	0	0		PAIN RIGHT THIGH	130	83	110	98	37.6		0	0	0	0	1	0	0	0	0	0	0	0	0	0	0	0	0	0	0	0	0	0	0	0	0
240169	2017-04-07	16:00:00	2	15	3	0	1	0	CHARCOAL	0	0	0	0	1	0	0		NECK PAIN	109	64	73	90	37.1	17.5697	0	0	0	0	0	0	0	0	0	0	1	0	0	0	0	0	0	0	0	0	0	0	0	0	0
240202	2017-04-07	21:00:00	2	12	3	0	1	0	CHARCOAL	0	0	0	0	1	0	0		ELBOW PAIN	115	82	121	99	37.3	16.7347	0	0	0	0	0	0	0	0	0	0	0	0	0	0	1	0	0	0	0	0	0	0	0	0	0
240229	2017-04-11	11:15:00	2	10	3	0	1	0	CHARCOAL+GAS	1	0	0	0	1	0	0		PAIN IN THE RIGHT HAND	111	87	95	80	36.8	15.102	0	0	0	0	0	1	0	0	0	0	0	0	0	0	0	0	0	0	0	0	0	0	0	0	0
240277	2017-04-10	14:25:00	2	12	3	1	1	0	CHARCOAL	0	0	0	0	0	0	0		LOWER LIMB PAIN	103	77	108	95	36.8	17.7515	0	0	0	0	0	0	0	0	0	0	0	0	0	0	0	0	0	0	0	0	0	0	0	0	0
240320	2017-04-14	17:05:00	2	13	3	0	1	0	CHARCOAL	0	0	0	0	1	0	0		WRIST PAIN	121	84	111	97	37	17.1647	0	0	0	0	0	0	0	1	0	0	0	0	0	0	0	0	0	0	0	0	0	0	0	0	0
240336	2017-04-13	16:50:00	2	14	3	0	1	0	CHARCOAL	0	0	0	0	1	0	0		WRIST PAIN	120	81	108	98	37.3	20.9702	0	0	0	0	0	1	0	0	0	0	0	0	0	0	0	0	0	0	0	0	0	0	0	0	0
240368	2017-04-17		2	17	3	1	1	0	CHARCOAL	0	0	0	0	0	0	0		RIGHT ANKLE PAIN	159	72	92	98	35.6	21.1858	0	1	0	0	0	0	0	0	0	0	0	0	0	0	0	0	0	0	0	0	0	0	0	0	0
240391	2017-04-17	16:15:00	2	12	3	1	1	0	CHARCOAL	0	0	0	0	0	0	0		MOUTH WOUND	96	54	107	98	36.4	13.5417	0	0	0	0	0	0	0	0	0	0	0	1	0	0	0	0	0	0	0	0	0	0	0	0	0
240422	2017-04-20	06:00:00	2	18	3	0	1	0	FIREWOOD	0	0	0	0	0	0	0		MULTIPLE WOUNDS ON SHOULDER	117	71	92	94	36.1	22.8624	0	0	0	0	0	0	0	0	0	0	0	0	0	0	0	0	0	0	0	0	0	0	0	0	0
240458	2017-04-23	11:15:00	2	15	3	0	1	0	CHARCOAL	0	0	0	0	1	0	0		LEFT FOOT PAIN	122	78	98	98	35.8	23.8787	0	0	0	0	0	0	0	0	0	0	0	0	0	0	0	0	0	0	0	1	0	0	0	0	0
240475	2017-04-21	17:40:00	2	14	3	0	1	0	CHARCOAL	0	0	0	0	1	0	0		LEFT FOOT PAIN	123	73	69	98	36	18.9873	0	0	0	0	0	0	0	0	0	0	0	0	0	0	0	0	0	0	0	1	0	0	0	0	0
240477	2017-04-21	14:10:00	2	12	3	1	1	0	CHARCOAL	0	0	1	0	1	0	0		LEFT ARM PAIN	136	92	122	95	37.5	21.7784	0	0	0	0	0	0	0	0	0	0	0	0	0	1	0	0	0	0	0	0	0	0	0	0	0
240510	2017-04-25	17:45:00	2	18	3	0	1	0	CHARCOAL	0	1	0	0	1	0	0		PAIN LEFT THIGH	130	75	105	99	36.7	20.8651	0	0	0	0	0	0	0	0	0	0	0	0	0	0	0	0	1	0	0	0	0	0	0	0	0
240517	2017-04-25	13:45:00	2	16	3	1	1	0	CHARCOAL+FIREWOOD	0	0	0	0	1	0	0		PAIN IN LEFT CLAVICLE REGION	109	78	91	99	36.2	22.9121	0	0	0	0	0	0	0	0	0	0	0	0	1	0	0	0	0	0	0	0	0	0	0	0	0
240543	2017-04-29	15:00:00	2	13	3	1	1	0	CHARCOAL	0	0	0	0	1	0	0		RIGHT SHOULDER PAIN	106	73	92	98	37.1	18.3085	0	0	0	0	0	0	0	0	1	0	0	0	0	0	0	0	0	0	0	0	0	0	0	0	0
260091	2017-04-05	21:30:00	2	13	3	0	1	0	CHARCOAL	0	0	0	0	0	0	0		KNEE/RIGHT FOOT PAIN	138	81	74	97	40.4	21.1104	0	1	0	0	0	0	0	0	0	0	0	0	0	0	0	0	0	0	0	0	0	0	0	0	0
260154	2017-04-08	12:15:00	2	18	3	0	1	0	CHARCOAL	0	0	0	0	1	0	0		RIGHT KNEE PAIN	132	88	98	99	37.8	17.5414	0	0	0	1	0	0	0	0	0	0	0	0	0	0	0	0	0	0	0	0	0	0	0	0	0
260156	2017-04-08	14:30:00	2	16	3	0	1	0	CHARCOAL	0	0	0	0	1	0	0		RIGHT ARM PAIN	137	86	80	98	37.8	19.4797	0	0	0	0	0	0	1	0	0	0	0	0	0	0	0	0	0	0	0	0	0	0	0	0	0
260181	2017-04-08	22:47:00	2	12	3	0	1	0	ELECTRIC OVEN	0	0	0	0	1	0	0		PAIN AND DIFFICULTY WITH VISION	89	61	87	96	35.9	15.1925	0	0	0	0	0	0	0	0	0	0	0	1	0	0	0	0	0	0	0	0	0	0	0	0	0
260185	2017-04-08	20:24:00	2	19	3	1	1	0	CHARCOAL+GAS OVEN	0	0	0	0	0	0	0		RIGHT LOWER LIMB PAIN	114	74	85	99	36.6	27.4395	0	1	0	1	0	0	0	0	0	0	0	0	0	0	0	0	0	0	0	0	0	0	0	0	0
260288	2017-04-12	18:30:00	2	11	3	0	1	0	FIREWOOD	0	0	0	0	1	0	0		LEFT ARM PAIN	95	66	132	97	37.6	15.824	0	0	0	0	0	0	0	0	0	0	0	0	0	1	0	0	0	0	0	0	0	0	0	0	0
260361	2017-04-15	18:54:00	2	12	3	0	1	0	CHARCOAL	0	0	0	0	0	0	0		LEFT SHOULDER PAIN	118	72	85	99	36.4	20.1793	0	0	0	0	0	0	0	0	0	0	0	0	1	0	0	0	0	0	0	0	0	0	0	0	0
260372	2017-04-16	12:15:00	2	12	3	0	1	0	CHARCOAL	0	0	0	0	0	0	0		LEFT FOREARM WOUND	145	78	137	97	36.6	16.9547	0	0	0	0	0	0	0	0	0	0	0	0	0	0	1	0	0	0	0	0	0	0	0	0	0
260379	2017-04-16	17:35:00	2	14	3	1	1	0	CHARCOAL	0	0	0	0	0	0	0		DOG BITE	121	83	103	99	36.8	19.598	0	0	0	0	1	0	0	0	0	0	0	0	0	0	0	0	0	0	0	0	0	0	0	0	0
260395	2017-04-14	17:20:00	2	15	3	1	1	0	CHARCOAL	0	0	0	0	1	0	0		RIGHT WRIST PAIN	115	65	89	98	36.5	19.6828	0	0	0	0	0	1	0	0	0	0	0	0	0	0	0	0	0	0	0	0	0	0	0	0	0
260409	2017-04-18	18:35:00	2	18	3	1	1	0	FIREWOOD	0	0	0	0	1	0	0		LEFT KNEE PAIN	116	73	62	98	36.7	20.1951	0	0	0	1	0	0	0	0	0	0	0	0	0	0	0	0	0	0	0	0	0	0	0	0	0
260435	2017-04-19	15:28:00	2	10	3	1	1	0	CHARCOAL	0	0	0	0	0	0	0		WRIST PAIN	120	80	107	90	37	26.465	0	0	0	0	0	0	0	0	0	0	0	0	0	0	0	0	0	0	0	0	0	0	0	0	0
260451	2017-04-18	20:55:00	2	19	3	0	1	0	CHARCOAL	0	0	0	0	1	0	0		LEFT THIGH PAIN	126	78	104	89	37	20.6641	0	0	0	0	0	0	0	0	0	0	0	0	0	0	0	0	0	1	0	0	0	0	0	0	0
260475	2017-04-20	16:40:00	2	17	3	0	1	0	CHARCOAL	0	0	0	0	1	0	0		ELBOW PAIN	111	80	79	99	36.4	20.3516	0	0	0	0	0	0	0	0	0	0	0	0	0	1	0	0	0	0	0	0	0	0	0	0	0
260476	2017-04-20	15:10:00	2	17	3	1	1	0	CHARCOAL	0	0	0	0	1	0	0		PAIN THROUGHOUT BODY	121	73	119	93	37.3	19.3548	0	0	0	0	0	0	0	0	0	0	0	0	0	0	0	0	0	0	0	0	0	0	0	0	0
260511	2017-04-18	15:54:00	2	19	3	0	1	0	FIREWOOD+GAS	0	0	0	0	1	0	0		RIGHT ANKLE PAIN	112	66	60	98	36.6	23.1544	0	1	0	0	0	0	0	0	0	0	0	0	0	0	0	0	0	0	0	0	0	0	0	0	0
260549	2017-04-24	13:35:00	2	15	3	1	1	0	CHARCOAL+FIREWOOD	0	0	0	0	1	0	0		BOWEL PAIN	120	66	99	99	36.5	20.4294	0	0	0	0	0	0	0	0	0	0	0	0	0	0	0	0	1	0	0	0	0	0	0	0	0
260614	2017-04-22	18:30:00	2	18	3	0	1	0	CHARCOAL	0	0	0	0	1	0	0		BODY PAIN	128	76	97	99	36.9	19.534	0	0	0	0	0	0	0	0	0	0	0	0	0	0	0	0	0	0	0	0	0	0	0	0	0
260620	2017-04-28	09:30:00	2	17	3	0	1	0	CHARCOAL+ELECTRICITY	0	0	0	0	1	0	0		BACK PAIN	116	75	86	97	36.6	22.0479	0	0	0	0	0	0	0	0	0	0	0	0	0	0	0	0	0	0	0	0	0	0	0	0	0
260651	2017-04-25	07:13:00	2	13	3	1	1	0	CHARCOAL	0	0	0	0	0	0	0		LEFT KNEE PAIN	105	71	109	98	36.5	16.8878	0	0	0	0	0	0	0	0	0	0	0	0	0	0	0	0	0	1	0	0	0	0	0	0	0
260672	2017-04-22	17:10:00	2	15	3	0	1	0	CHARCOAL	0	0	0	0	1	0	0		LEFT ARM PAIN	109	60	86	99	37	20.4816	0	0	0	0	0	0	0	0	0	0	0	0	0	1	0	0	0	0	0	0	0	0	0	0	0
260673	2017-04-22	17:00:00	2	14	3	0	1	0	CHARCOAL	0	0	0	0	0	0	0		FOOT PAIN	97	46	88	96	38	17.1832	0	1	0	0	0	0	0	0	0	0	0	0	0	0	0	0	0	0	0	0	0	0	0	0	0
260692	2017-04-26	14:58:00	2	18	3	0	1	0	CHARCOAL	0	0	0	0	0	0	0		LEFT KNEE PAIN	102	64	102	98	37.3	23.833	0	0	0	0	0	0	0	0	0	0	0	0	0	0	0	0	1	0	0	0	0	0	0	0	0
260703	2017-04-26	12:38:00	2	13	3	0	1	0	CHARCOAL	0	0	0	0	0	0	0		RIGHT FOOT PAIN	120	78	98	98	36.5	18.6667	0	1	0	0	0	0	0	0	0	0	0	0	0	0	0	0	0	0	0	0	0	0	0	0	0
91828	2017-10-01	14:27:00	2	18	3	1	1		CHARCOAL				0	0	0	0		RIGHT ELBOW EXCORIATION	127	88	80		36.4	27.2118	0	0	0	0	0	0	1	0	0	0	0	0	0	0	0	0	0	0	0	0	0	0	0	0	0
918293	2017-10-04	06:30:00	2	14	3	0	1		CHARCOAL				0	0	0	0		RIGHT SHOULDER PAIN	118	61	82	99	37	16.6222	0	0	0	0	0	0	0	0	1	0	0	0	0	0	0	0	0	0	0	0	0	0	0	0	0
9182103	2017-10-04	17:22:00	2	19	3	1	1		FIREWOOD				0	0	0	0		LEFT ARM SWELLING AND PAIN	127	76	97	99	37.1	23.7645	0	0	0	0	0	0	0	0	0	0	0	0	0	0	0	1	0	0	0	0	0	0	0	0	0
9182127	2017-10-05	13:06:00	2	10	3	1	1	0	CHARCOAL	1	0	0	0	1	0	0		LEFT FOOT PAIN	120	90	115	97	36.8	17.0162	0	0	0	0	0	0	0	0	0	0	0	0	0	0	0	0	0	0	0	1	0	0	0	0	0
9182166	2017-10-06	14:23:00	2	15	3	0	1		CHARCOAL				0	0	0	0		LEFT ANKLE PAIN	130	78	88	99	37.1	18.3661	0	0	0	0	0	0	0	0	0	0	0	0	0	0	0	0	0	0	0	1	0	0	0	0	0
9182179	2017-10-06	12:31:00	2	10	3	0	1	0	CHARCOAL+FIREWOOD	0	0	0	0	0	0	0		TRAUMA OF LEFT WRIST	120	80	126	99	37.1	20.6226	0	0	0	0	0	1	0	0	0	0	0	0	0	0	0	0	0	0	0	0	0	0	0	0	0
9182213	2017-10-07	15:13:00	2	18	3	0	1	0	CHARCOAL	1	1	0	0	1	0	0		KNEE PAIN	124	66	96	98	36.7	24.9433	1	0	0	1	0	0	0	0	0	0	0	0	0	0	0	0	0	0	0	0	0	0	0	0	0
9182242	2017-10-08	12:01:00	2	14	3	1	1	0		0	0	0	0	0	0	0		LEG PAIN	125	73	98	99	37	14.0157	0	0	0	0	0	0	0	0	0	0	0	0	0	0	0	0	0	0	1	0	0	0	0	0	0
9182325	2017-10-10	12:45:00	2	12	3	0	1		CHARCOAL				0	1	0	0		OBJECT IN RIGHT EAR	83	51	121	99	36.2	16.5982	0	0	0	0	0	0	0	0	0	0	0	1	0	0	0	0	0	0	0	0	0	0	0	0	0
9182332	2017-10-10	18:36:00	2	10	3	1	1		CHARCOAL				0	0	0	0		PHYSICAL AGGRESSION			113	98	36.4	15.6805	0	0	0	0	0	0	0	0	0	0	0	1	0	0	0	0	0	0	0	0	0	0	0	0	0
9182335	2017-10-10	20:00:00	2	19	3	1	1		CHARCOAL				0	0	0	0		WOUNDS	116	74	86	99	36.2	14.0084	0	1	0	0	0	0	0	0	0	0	0	0	0	0	0	0	0	0	0	1	0	0	0	0	0
9182375	2017-10-11	21:27:00	2	17	3	0	1		CHARCOAL				0	1	0	0		WHOLE BODY PAIN	128	67	100	98	37.1	20.9366	0	0	0	0	0	0	0	0	0	0	0	0	0	0	0	0	0	0	0	0	0	0	0	0	0
9182388	2017-10-12	14:33:00	2	17	3	1	1		CHARCOAL				0	1	0	0		RIGHT KNEE PAIN	123	73	88	99	36.4	22.0642	0	0	0	1	0	0	0	0	0	0	0	0	0	0	0	0	0	0	0	0	0	0	0	0	0
9182411	2017-10-12	22:52:00	2	19	3	0	1		CHARCOAL				0	0	0	0		FALL ONTO BOTTLE	134	93	81	98	33.2	26.5625	0	0	0	0	0	0	0	0	0	0	0	0	0	0	0	1	0	0	0	0	0	0	0	0	0
9182435	2017-10-13	12:22:00	2	15	3	0	1		CHARCOAL				0	1	0	0		FOREIGN BODY IN RIGHT EAR	120	74	86	98	36.7	23.8751	0	0	0	0	0	0	0	0	0	0	0	1	0	0	0	0	0	0	0	0	0	0	0	0	0
9182446	2017-10-13	19:45:00	2	16	3	1	1		CHARCOAL				0	1	0	0		BURNS	118	81	87	99	36.6	18.7616	0	0	0	0	0	0	0	0	0	0	0	0	0	0	0	0	0	0	0	0	0	0	0	0	0
9182508	2017-10-15	15:46:00	2	12	3	0	1		CHARCOAL				0	0	0	0		FALL FROM TREE	113	72	109	98	37.3	16.3333	0	0	0	0	0	0	0	0	1	0	0	0	0	0	0	0	0	0	0	0	0	0	0	0	0
9182563	2017-10-16	12:44:00	2	12	3	1	1		CHARCOAL				0	0	0	0		RIGHT MOLAR REGION WOUND	114	67	84	99	36.6	17.3611	0	0	0	0	0	1	0	0	0	0	0	0	0	0	0	0	0	0	0	0	0	0	0	0	0
9182573	2017-10-16	16:50:00	2	17	3	0	1		CHARCOAL				0	0	0	0		RIGHT ARM PAIN	115	72	107	97	37.8	21.6345	0	0	0	0	0	1	0	0	0	0	0	0	0	0	0	0	0	0	0	0	0	0	0	0	0
9182598	2017-10-17	08:09:00	2	10	3	1	1		CHARCOAL				0	0	0	0		PAPER IN EAR	110	90			36.7	15.9278	0	0	0	0	0	0	0	0	0	0	0	1	0	0	0	0	0	0	0	0	0	0	0	0	0
9182617	2017-10-17	10:28:00	2	16	3	1	1	0	GAS+CHARCOAL	1	0	0	0	0	0	0		FINGER PAIN	104	89	89	99	35.8	18.3989	0	0	0	0	0	0	0	0	0	0	0	0	0	0	0	0	0	0	0	0	0	0	0	0	0
9182629	2017-10-17	12:41:00	2	15	3	1	1		CHARCOAL				1	1	0	0		LEFT KNEE PAIN	103	69	85	99	33.6	15.8893	0	0	0	0	0	0	0	0	0	0	0	0	0	0	0	0	0	1	0	0	0	0	0	0	0
9182638	2017-10-17	17:00:00	2	11	3	1	1		CHARCOAL				0	0	0	0		RIGHT THIGH WOUND			143	91	35.3	43.8957	0	0	0	0	0	0	0	0	0	0	0	0	0	0	0	0	0	0	0	0	0	0	0	0	0
9182672	2017-10-18	08:55:00	2	19	3	1	1	0	CHARCOAL	1	0	0	0	0	0	0		INGESTION OF VARIOUS MEDICATIONS	121	78	105	99	36.6	19.7484	0	0	0	0	0	0	0	0	1	0	0	0	0	0	0	0	0	0	0	0	0	0	0	0	0
9182673	2017-10-18	08:57:00	2	15	3	0	1		CHARCOAL				0	0	0	0		LEFT HAND WOUND	154	75	99	99	36.4	20.0973	0	0	0	0	0	0	0	0	0	0	0	0	0	0	0	1	0	0	0	1	0	0	0	0	0
9182690	2017-10-18	12:22:00	2	10	3	0	1		CHARCOAL				0	1	0	0		ARM PAIN	130	80	116	99	35.8	13.698	0	0	0	0	0	0	0	0	0	0	0	0	0	0	0	1	0	0	0	0	0	0	0	0	0
9182765	2017-10-19	22:55:00	2	14	3	0	1						0	0	0	0		DOG BITE	120	78	75	98	36.6	17.0718	0	0	0	0	0	1	0	0	0	0	0	0	0	0	0	0	1	0	0	0	0	0	0	0	0
9182795	2017-10-20	16:23:00	2	14	3	0	1		CHARCOAL				0	1	0	0		RIGHT HAND PAIN	112	69	91	98	36.5	41.3945	0	0	0	0	0	0	0	0	0	0	0	0	0	0	0	0	0	0	0	0	0	0	0	0	0
9182826	2017-10-21	10:20:00	2	13	3	0	1		CHARCOAL				0	1	0	0		LEFT AND RIGHT ARM PAIN POST FALL	115	77	86	99	36.3	17.8027	0	0	0	1	0	0	0	0	0	0	0	0	0	0	0	0	0	0	0	0	0	0	0	0	0
9182861	2017-10-21	18:16:00	2	14	3	0	1		CHARCOAL				0	0	0	0		KNEE PAIN	105	68	101	99	38	17.1688	0	0	0	1	0	0	0	0	0	0	0	0	0	0	0	0	0	0	0	0	0	0	0	0	0
9182882	2017-10-22	08:25:00	2	13	3	1	1		CHARCOAL				0	0	0	0		LEFT FOOT PAIN	98	70	120	99	36.4	22.0476	0	0	0	0	0	0	0	0	0	0	0	0	0	0	0	0	0	0	0	1	0	0	0	0	1
9182890	2017-10-22	11:13:00	2	11	3	0	1		CHARCOAL				0	0	0	0		SPINE PAIN	117	55	97	97	36.4	18.8265	0	0	0	0	0	0	0	0	0	0	0	0	0	0	0	0	0	0	0	0	0	0	0	0	0
9182901	2017-10-22	13:20:00	2	17	3	1	1	1	CHARCOAL	0	0	0	0	1	0	0		TRAFFIC ACCIDENT	109	73	104	98	37.1	22.984	0	1	0	0	0	0	0	0	0	0	0	0	0	0	0	0	0	0	0	0	0	0	0	0	0
9182902	2017-10-22	14:03:00	2	11	3	1	1	0	CHARCOAL	1	0	0	0	0	0	0		FALL/FEVER	102	67	91	98	36	18.0616	0	0	0	0	0	0	0	0	0	0	0	0	0	0	0	1	0	0	0	0	0	0	0	0	0
9182911	2017-10-22	16:57:00	2	16	3	0	1	1	CHARCOAL+FIREWOOD	1	0	0	0	0	0	0		FALL	128	74	107	99	36.8	18.0889	0	0	0	0	0	0	0	0	0	0	0	0	0	1	0	0	0	0	0	0	0	0	0	0	0
9182929	2017-10-22	20:41:00	2	19	3	1	1	1	CHARCOAL	1	0	0	0	0	0	0		PHYSICAL AGGRESSION	117	77	69	99	36.6	26.1011	0	0	0	0	0	0	0	0	0	0	0	0	0	0	0	1	0	0	0	0	0	0	0	0	0
9182939	2017-10-24	06:49:00	2	11	3	0	1		CHARCOAL				0	1	0	0		RIGHT SHOULDER PAIN			82	99	36.8	15.0657	0	0	0	0	0	0	0	0	1	0	0	0	0	0	0	0	0	0	0	0	0	0	0	0	0
9182944	2017-10-23	08:36:00	2	10	3	0	1		CHARCOAL				0	0	0	0		EYE TRAUMA			75	99	36.7	18.1683	0	0	0	0	0	0	0	0	0	0	0	0	0	0	0	0	0	0	0	0	0	0	0	0	0
9182952	2017-10-23	09:42:00	2	11	3	1	1	0	CHARCOAL	1	0	0	0	0	0	0		KNEE PAIN	106	72	135	99	37.6	16.5706	0	0	0	0	0	0	0	0	0	0	0	0	0	0	0	0	0	1	0	0	0	0	0	0	0
9182953	2017-10-23	09:49:00	2	16	3	0	1		CHARCOAL				0	0	0	0		CHEST PAIN	107	66	80	98	36.7	19.2628	0	0	0	0	0	0	0	0	0	1	0	0	0	0	0	0	0	0	0	0	0	0	0	0	0
9182960	2017-10-23	10:59:00	2	13	3	1	1		CHARCOAL				0	0	0	0		LEFT ARM PAIN	114	56	105	99	37.5	24.0237	0	0	0	0	0	0	0	1	0	0	0	0	0	0	0	0	0	0	0	0	0	0	0	0	0
9182965	2017-10-23	12:39:00	2	15	3	0	1		CHARCOAL				0	0	0	0		RIGHT ANKLE PAIN	116	64	111	99	36.4	19.4898	0	1	0	0	0	0	0	0	0	0	0	0	0	0	0	0	0	0	0	0	0	0	0	0	0
91821035	2017-10-24	19:33:00	2	14	3	0	1		CHARCOAL				0	1	0	0		LEFT ELBOW PAIN/RIGHT LEG PAIN			109	99	36.6	14.592	0	1	0	0	0	0	0	0	0	0	0	0	0	0	1	0	0	0	0	0	0	0	0	0	0
91821052	2017-10-25	06:13:00	2	19	3	0	1	0	CHARCOAL	0	0	0	0	1	0	0		EXCORIATIONS	148	89	101	98	36.9	22.1966	0	0	0	0	0	0	0	0	0	0	0	0	0	0	0	0	0	0	0	0	0	0	0	0	0
91821070	2017-10-25	10:00:00	2	11	3	1	1		CHARCOAL				0	0	0	0		LEFT ARM PAIN	109	73	82	99	36.1	13.8831	0	0	0	0	0	0	0	0	0	0	0	0	0	0	0	0	0	0	0	0	0	0	0	0	0
91821091	2017-10-25	20:31:00	2	15	3	0	1		CHARCOAL				0	1	0	0		MOUTH EXCORIATION AND WOUND	139	75	125	97	37.1	18.8776	0	0	0	0	0	0	0	0	0	0	0	1	0	0	0	0	0	0	0	0	0	0	0	0	0
91821110	2017-10-26	10:16:00	2	10	3	1	1		CHARCOAL+FIREWOOD				0	0	0	0		FALL	149	99	162	96	37.2	16.7822	0	0	0	0	0	0	0	0	0	0	0	0	1	0	0	0	0	0	0	0	0	0	0	0	0
91821140	2017-10-27	06:00:00	2	17	3	1	1		CHARCOAL				0	1	0	0		LEFT ELBOW PAIN	121	77	106	99	36.4	22.1482	0	0	0	0	0	0	0	0	0	0	0	0	0	0	1	0	0	0	0	0	0	0	0	0	0
91821145	2017-10-27	07:25:00	2	12	3	0	1	0	CHARCOAL	1	0	0	0	0	0	0		LEFT FOOT WOUND			84		35.8	15.9305	0	0	0	0	0	0	0	0	0	0	0	0	0	0	0	0	0	0	0	1	0	0	0	0	0
91821163	2017-10-27	10:28:00	2	16	3	0	1	0	CHARCOAL	0	0	0	0	0	0	0		TRAFFIC ACCIDENT	111	70	80	98	36.6	19.2035	0	0	0	0	0	0	0	0	0	0	0	0	0	0	0	1	0	0	0	0	0	0	0	0	0
91821167	2017-10-27	12:08:00	2	15	3	0	1		CHARCOAL				0	0	0	0		LEFT LEG PAIN AND SWELLING	124	90	100	99	37.5	19.86	0	0	0	0	0	0	0	0	0	0	0	0	0	0	0	0	1	0	0	0	0	0	0	0	0
91821181	2017-10-27	15:55:00	2	10	3	1	1	0	CHARCOAL	1	0	0	0	1	0	0		LEFT THIGH TRAUMA	100	80	133	99	37.6	15.2995	0	0	0	0	0	0	0	0	0	0	0	0	0	0	0	0	1	0	0	0	0	0	0	0	0
91821182	2017-10-27	15:59:00	2	14	3	1	1		CHARCOAL				0	0	0	0		LEFT WRIST PAIN	117	74	83	99	36.7	20.7812	0	0	0	0	0	0	0	0	0	0	0	0	0	0	0	1	0	0	0	0	0	0	0	0	0
91821210	2017-10-28	09:55:00	2	16	3	0	1		CHARCOAL				0	0	0	0		KNEE TRAUMA	90	60	134	99	37	11.7335	0	0	0	1	0	0	0	0	0	0	0	0	0	0	0	0	0	0	0	0	0	0	0	0	0
91821227	2017-10-28	17:08:00	2	10	3	0	1	0	CHARCOAL	1	0	0	0	1	0	0		SWOLLOWED MONEY	90	60	96	80	36.3	16.988	0	0	0	0	0	0	0	0	0	0	0	0	0	0	0	0	0	0	0	0	0	0	0	0	0
91821247	2017-10-29	09:20:00	2	17	3	0	1		CHARCOAL				0	0	0	0		FALL PLAYING FOOTBALL	140	72	86		36.7	21.6345	0	0	1	0	0	0	0	0	0	0	0	0	0	0	0	0	0	0	0	0	0	0	0	0	0
91821252	2017-10-29	10:18:00	2	16	3	0	1	1	CHARCOAL	0	0	0	0	0	0	0		FALL	125	74	93	97	36	20.4106	0	0	0	0	0	0	0	0	0	0	0	0	0	0	0	1	0	0	0	0	0	0	0	0	0
91821262	2017-10-29	14:21:00	2	11	3	0	1	1	CHARCOAL	1	1	0	0	0	0	0		FALL	103	59	72	97	36.5	18.6557	0	0	0	0	0	0	0	0	0	0	0	0	1	0	0	0	0	0	0	0	0	0	0	0	0
91821322	2017-10-30	21:20:00	2	15	3	0	1		CHARCOAL				0	1	0	0		HEAD WOUND	107	70	74	99	36.9	20.8997	0	0	0	0	0	0	0	0	0	0	0	1	0	0	0	0	0	0	0	0	0	0	0	0	0
91821331	2017-10-31	06:20:00	2	12	3	1	1		CHARCOAL				0	1	0	0		LEFT HIP PAIN	124	97	76	98	36	19.4135	0	0	0	0	0	0	0	0	0	0	0	0	0	0	0	0	1	0	0	0	0	0	0	0	0
240210	2017-04-11	10:46:00	2	16	3	1	1	0	CHARCOAL	0	1	0	0	1	0	0		5 MONTHS PREGNANT/BLEEDING IN THE BREASTS	118	52	102	94	37	24.4471	0	0	0	0	0	0	0	0	0	0	0	0	0	0	0	0	0	0	0	0	0	0	0	0	0
9182940	2017-10-23	07:49:00	2	13	3	1	1	0	CHARCOAL	1	0	0	0	1	0	0		LEFT ARM PAIN	100	55	100	99	35.9	19.5855	0	0	0	0	0	0	0	0	0	0	0	0	0	0	0	0	0	0	0	0	0	0	0	0	0
260252	2017-04-12	09:30:00	2	11	3	0	1	0	CHARCOAL+ELECTRIC	0	0	0	0	1	0	0		SCORPION BITE	128	57	92	95	36.2	17.9722	0	0	0	0	0	0	0	0	0	0	0	0	0	0	0	0	0	0	0	0	0	0	0	0	0
91823	2017-10-01	09:21:00	2	18	3	1	1		CHARCOAL				0	0	0	0		SEXUAL ASSAULT	130	85	117		36.6	19.2894	0	0	0	0	0	0	0	0	0	0	0	0	0	0	0	0	0	0	0	0	0	0	0	1	0
240233	2017-04-11	16:17:00	2	17	3	1	1	0	CHARCOAL	0	0	0	0	1	0	0		SUDDEN FALL/DIZZINESS	125	84	72	95	36.2	23.8343	0	0	0	0	0	0	0	0	0	0	0	0	0	0	0	0	0	0	0	0	0	0	0	0	0
260046	2017-04-04		2	16	3	0	1	0	FIREWOOD	0	0	0	0	1	0	0		GENERALIZED DERMATITIS	135	78	83	98	37.4	20.7094	0	0	0	0	0	0	0	0	0	0	0	0	0	0	0	0	0	0	0	0	0	0	0	0	0
260382	2017-04-17	20:00:00	2	11	3	0	1	0	FIREWOOD	0	0	0	0	1	0	0		LEFT ELBOW PAIN	130	80	108	99	37	28.4238	0	0	0	0	0	0	0	0	0	0	0	0	0	0	0	0	0	0	0	0	0	0	0	0	0
9182173	2017-10-06	08:05:00	2	14	3	1	1	0	CHARCOAL	1	0	0	0	0	0	0		AXILLA PAIN	94	65	72	97	36.5	12.4579	0	0	0	0	0	0	0	0	0	0	0	0	0	0	0	0	0	0	0	0	0	0	0	0	0
9182347	2017-10-11	08:48:00	2	18	3	1	1		FIREWOOD				0	0	0	0		GENITAL ITCHING	116	77	110	97	36	23.2335	0	0	0	0	0	0	0	0	0	0	0	0	0	0	0	0	0	0	0	0	0	0	0	0	0
9182756	2017-10-19	17:34:00	2	17	3	1	1		CHARCOAL				0	1	0	0		PIMPLES SCATTERED OVER BODY	117	85	134	99	36.4	21.511	0	0	0	0	0	0	0	0	0	0	0	0	0	0	0	0	0	0	0	0	0	0	0	0	0
9182888	2017-10-22	09:40:00	2	15	3	1	1		CHARCOAL				0	0	0	0		NECK PAIN/FACIAL PAIN	112	76	84	99	35.7	19.9704	0	0	0	0	0	0	0	0	0	0	1	1	0	0	0	0	0	0	0	0	0	0	0	0	0
91821060	2017-10-25	08:21:00	2	17	3	0	1		CHARCOAL				0	1	0	0		LEG AND ANKLE PAIN	121	71	122	99	38.9	19.1001	0	1	1	0	0	0	0	0	0	0	0	0	0	0	0	0	0	0	0	0	0	0	0	0	0
240088	2017-04-04	06:08:00	2	10	3	1	1	0	ELECTRIC OVEN	0	0	0	0	1	0	0			98	68	162	96	36.6	20.192	0	0	0	0	0	0	0	0	0	0	0	0	0	0	0	0	0	0	0	0	0	0	0	0	0
240177	2017-04-07	09:04:00	2	10	3	1	1	0	CHARCOAL+GAS COOKER	0	0	0	0	0	0	0		FEVER					37.4	14.6025	0	0	0	0	0	0	0	0	0	0	0	0	0	0	0	0	0	0	0	0	0	0	0	0	0
240273	2017-04-10	15:58:00	2	13	3	0	1	0	CHARCOAL	0	0	0	0	0	0	0		FEVER	110	72	111	93	35.9	26.6655	0	0	0	0	0	0	0	0	0	0	0	0	0	0	0	0	0	0	0	0	0	0	0	0	0
240293	2017-04-13	17:45:00	2	11	3	0	1	0	CHARCOAL	0	0	0	0	1	0	0		DIFFICULTY BREATHING	104	76	100	93	36	15.013	0	0	0	0	0	0	0	0	0	0	0	0	0	0	0	0	0	0	0	0	0	0	0	0	0
240434	2017-04-21	21:06:00	2	12	3	1	1	0	CHARCOAL	0	0	0	1	1	0	0		FEVER/HEADACHE	105	72	106	98	37	15.3905	0	0	0	0	0	0	0	0	0	0	0	0	0	0	0	0	0	0	0	0	0	0	0	0	0
240460	2017-04-23	13:10:00	2	16	3	0	1	0	CHARCOAL	0	0	0	0	1	0	0		FEVER	123	66	111	99	39.5	22.5027	0	0	0	0	0	0	0	0	0	0	0	0	0	0	0	0	0	0	0	0	0	0	0	0	0
240479	2017-04-21	12:45:00	2	18	3	1	1	0	CHARCOAL	0	0	0	0	1	0	0		FEVER	109	74	99	98	37	18.4328	0	0	0	0	0	0	0	0	0	0	0	0	0	0	0	0	0	0	0	0	0	0	0	0	0
240519	2017-04-25	12:15:00	2	18	3	0	1	0	CHARCOAL	0	0	0	0	1	0	0		ARTHRALGIA/FEVER	106	61	82	98	37.2	19.1973	0	0	0	0	0	0	0	0	0	0	0	0	0	0	0	0	0	0	0	0	0	0	0	0	0
260015	2017-04-02	07:55:00	2	19	3	0	1	1	CHARCOAL	0	0	0	0	1	0	0		HEADACHE	104	56	82	66	37.1	19.2234	0	0	0	0	0	0	0	0	0	0	0	1	0	0	0	0	0	0	0	0	0	0	0	0	0
260044	2017-04-04	09:12:00	2	16	3	0	1	0	CHARCOAL	0	0	0	0	1	0	0		SORE THROAT/FEVER	117	82	101	96	36	16.4713	0	0	0	0	0	0	0	0	0	0	0	0	0	0	0	0	0	0	0	0	0	0	0	0	0
260139	2017-04-06	17:03:00	2	18	3	1	1	0	FIREWOOD	0	0	0	0	1	0	0		COUGH/DIFFICULTY BREATHING	132	82	98	98	37.2	24.897	0	0	0	0	0	0	0	0	0	0	0	0	0	0	0	0	0	0	0	0	0	0	0	0	0
260458	2017-04-20	08:20:00	2	19	3	1	1	0	CHARCOAL+GAS	0	1	0	0	1	0	0		LEFT EAR PAIN	103	87	109	98	35.8	16.4187	0	0	0	0	0	0	0	0	0	0	0	0	0	0	0	0	0	0	0	0	0	0	0	0	0
260460	2017-04-20	09:25:00	2	18	3	0	1	0	CHARCOAL	0	1	0	0	1	0	0		PAIN IN RIGHT NOSTRIL	136	90	107	97	37	21.4187	0	0	0	0	0	0	0	0	0	0	0	0	0	0	0	0	0	0	0	0	0	0	0	0	0
260541	2017-04-24	10:30:00	2	10	3	1	1	0	CHARCOAL	0	0	0	0	0	0	0		COUGH	120	90	99	99	36.2	7.86709	0	0	0	0	0	0	0	0	0	0	0	0	0	0	0	0	0	0	0	0	0	0	0	0	0
260583	2017-04-26	02:00:00	2	19	3	0	1	0	CHARCOAL	0	0	0	0	0	0	0		DIFFICULTY BREATHING/COUGH	118	80	71	99	36	19.9498	0	0	0	0	0	0	0	0	0	0	0	0	0	0	0	0	0	0	0	0	0	0	0	0	0
260630	2017-04-27	17:32:00	2	18	3	1	1	0	CHARCOAL	0	0	0	0	1	0	0		FEVER	111	78	100	94	36.3	17.8516	0	0	0	0	0	0	0	0	0	0	0	0	0	0	0	0	0	0	0	0	0	0	0	0	0
260722	2017-04-30	17:40:00	2	14	3	0	1	0	CHARCOAL	0	0	0	0	1	0	0		FEVER/COUGH	73	48	135	98	40	24.5918	0	0	0	0	0	0	0	0	0	0	0	0	0	0	0	0	0	0	0	0	0	0	0	0	0
918242	2017-10-02	17:56:00	2	19	3	1	1	1	CHARCOAL	0	0	0	0	1	0	0		THROAT PAIN/HEADACHE	140	80	119	99	37.5	21.7914	0	0	0	0	0	0	0	0	0	0	0	0	0	0	0	0	0	0	0	0	0	0	0	0	0
9182209	2017-10-07	08:49:00	2	19	3	1	1		GAS+CHARCOAL				0	0	0	0		COUGH/FEVER	117	77	60	99	34.8	19.5616	0	0	0	0	0	0	0	0	0	0	0	0	0	0	0	0	0	0	0	0	0	0	0	0	0
9182422	2017-10-13	09:19:00	2	13	3	0	1		GAS+ELECTRIC OVEN				0	1	0	0		DIFFICULTY BREATHING	106	62	83	98	36.8	20.3954	0	0	0	0	0	0	0	0	0	0	0	0	0	0	0	0	0	0	0	0	0	0	0	0	0
9182473	2017-10-14	17:33:00	2	10	3	0	1	0	CHARCOAL	0	1	1	0	1	0	0		SORE THROAT	120	80	108	98	37.2	21.0007	0	0	0	0	0	0	0	0	0	0	0	0	0	0	0	0	0	0	0	0	0	0	0	0	0
9182504	2017-10-15	15:16:00	2	11	3	1	1		CHARCOAL				0	1	0	0		PHYSICAL AGGRESSION	114	66	91	98	36.7	14.59	0	0	0	0	0	0	0	0	0	0	0	0	0	0	0	0	0	0	0	0	0	0	0	0	0
9182740	2017-10-19	11:27:00	2	14	3	0	1		CHARCOAL				0	0	0	0		THROAT PAIN	109	57	72	98	36.7	23.9792	0	0	0	0	0	0	0	0	0	0	0	0	0	0	0	0	0	0	0	0	0	0	0	0	0
9182895	2017-10-22	12:28:00	2	10	3	1	1	0	CHARCOAL	0	0	0	0	1	0	0		COUGH	100	60	110	99	36	16.0508	0	0	0	0	0	0	0	0	0	0	0	0	0	0	0	0	0	0	0	0	0	0	0	0	0
9182931	2017-10-22	22:37:00	2	18	3	0	1	1	CHARCOAL	1	1	0	0	1	0	0		CHEST PAIN/GENERALIZED WEAKNESS	125	74	81	96	36.7	24.7183	0	0	0	0	0	0	0	0	0	0	0	0	0	0	0	0	0	0	0	0	0	0	0	0	0
91821104	2017-10-26	08:48:00	2	14	3	1	1		CHARCOAL				0	1	0	0		PALPITATIONS/DIFFICULTY BREATHING	109	35	98	99	37.1	22.3236	0	0	0	0	0	0	0	0	0	0	0	0	0	0	0	0	0	0	0	0	0	0	0	0	0
9182540	2017-10-16	07:55:00	2	18	3	1	1		CHARCOAL				0	1	0	0		HEADACHE	123	72	84	99	35.4	20.2059	0	0	0	0	0	0	0	0	0	0	0	0	0	0	0	0	0	0	0	0	0	0	0	0	0
9182548	2017-10-16	09:39:00	2	10	3	1	1		CHARCOAL				0	0	0	0		FAINTED	110	60			35	17.5815	0	0	0	0	0	0	0	0	0	0	0	0	0	0	0	0	0	0	0	0	0	0	0	0	0
240118	2017-04-06	17:00:00	2	10	3	0	1	0	CHARCOAL	0	0	0	0	0	0	0		LEFT LEG PAIN	91	64	126	98	37	14.9811	0	0	0	0	0	0	0	0	0	0	0	0	0	0	0	0	0	0	0	0	0	0	0	0	0
260250	2017-04-12	08:00:00	2	13	3	1	1	0	CHARCOAL	0	0	0	0	0	0	0		SHOULDER PAIN/HEADACHE	125	86	95	99	36.4	21.8909	0	0	0	0	0	0	0	0	0	0	0	0	0	0	0	0	0	0	0	0	0	0	0	0	0
260262	2017-04-12	11:20:00	2	16	3	0	1	0	CHARCOAL	0	0	0	0	1	0	0		BODY ACHE	126	74	96	98	36.7	20.6904	0	0	0	0	0	0	0	0	0	0	1	0	0	0	0	0	0	0	0	0	0	0	0	0	0
260517	2017-04-18		2	15	3	1	1	0	FIREWOOD	0	0	0	0	1	0	0		RIGHT HIP PAIN WITH PUS	109	73	111	95	37.1	14.1723	0	0	0	0	0	0	0	0	0	0	0	0	0	0	0	0	0	0	0	0	0	0	0	0	0
918230	2017-10-02	09:07:00	2	10	3	0	1		CHARCOAL				0	0	0	0		ARM PAIN	100	42	73		37.1	15.5533	0	0	0	0	0	0	0	0	0	0	0	0	0	0	0	1	0	0	0	0	0	0	0	0	0
918240	2017-10-02	11:22:00	2	19	3	1	1		CHARCOAL				0	0	0	0		LEFT LEG PAIN	114	71	97		36.7	22.2472	0	0	0	0	0	0	0	0	0	0	0	0	0	0	0	0	0	0	0	0	0	0	0	0	0
9182383	2017-10-12	08:04:00	2	12	3	1	1		FIREWOOD+CHARCOAL				0	1	0	0		WHOLE BODY ACHE	125	87	119	97	37	18.7608	0	0	0	0	0	0	0	0	0	0	0	0	0	0	0	0	0	0	0	0	0	0	0	0	0
9182943	2017-10-23	08:19:00	2	18	3	0	1	0		1	0	0	0	0	0	0		LUMBAR SPINE PAIN	125	88	70	99	36.7	28.4665	0	0	0	0	0	0	0	0	0	0	0	0	0	0	0	0	0	0	0	0	0	0	0	0	0
9182999	2017-10-24	08:29:00	2	19	3	0	1		CHARCOAL				0	0	0	0		LEFT KNEE SWELLING	137	78	56	99	37	24.1198	0	0	0	0	0	0	0	0	0	0	0	0	0	0	0	0	0	0	0	0	0	0	0	0	0
91821062	2017-10-25	08:53:00	2	14	3	0	1		CHARCOAL				0	1	0	0		RIGHT FINGER PAIN	106	68	96	99	36.6	17.7778	0	0	0	0	0	0	0	0	0	0	0	0	0	0	0	0	0	0	0	0	0	0	0	0	0
91821116	2017-10-26	11:59:00	2	10	3	0	1		CHARCOAL				0	0	0	0		LEFT LEG SWELLING	160	70	156	99	36.6	14.8086	0	0	0	0	0	0	0	0	0	0	0	0	0	0	0	0	0	0	0	0	0	0	0	0	0
91821257	2017-10-29	11:23:00	2	19	3	1	1		FIREWOOD				0	1	0	0		LUMBAR SPINE PAIN	112	62	118	99	36.7	21.8742	0	0	0	0	0	0	0	0	0	0	0	0	0	0	0	0	0	0	0	0	0	0	0	0	0
91821301	2017-10-30	10:35:00	2	19	3	1	1	0	CHARCOAL	1	0	0	0	0	0	0		LEFT LEG PAIN	110	70	108	99	37.2	22.6368	0	0	0	0	0	0	0	0	0	0	0	0	0	0	0	0	0	0	0	0	0	0	0	0	0
240031	2017-04-01	20:34:00	2	16	3	1	1	0	CHARCOAL	0	0	0	0	1	0	0		LOWER ABDOMEN PAIN	121	81	108	98	37	19.6503	0	0	0	0	0	0	0	0	0	0	0	0	0	0	0	0	0	0	0	0	0	0	0	0	0
260145	2017-04-06	09:21:00	2	19	3	1	1	0	CHARCOAL	0	0	0	0	1	0	0		VAGINAL BLEEDING	128	85	75	99	36.4	20.83	0	0	0	0	0	0	0	0	0	0	0	0	0	0	0	0	0	0	0	0	0	0	0	0	0
260420	2017-04-19	22:05:00	2	17	3	0	1	0	CHARCOAL	0	0	0	0	1	0	0		GENITAL PAIN	145	63	92	98	37.7	17.3641	0	0	0	0	0	0	0	0	0	0	0	0	0	0	0	0	0	0	0	0	0	0	0	0	0
918254	2017-10-03	10:52:00	2	13	3	0	1		CHARCOAL				0	1	0	0		PAIN ON URINATION				98	37	16.4609	0	0	0	0	0	0	0	0	0	0	0	0	0	0	0	0	0	0	0	0	0	0	0	0	0
9182145	2017-10-05	08:07:00	2	16	3	1	1		CHARCOAL				0	1	0	0		FEVER/PAIN	106	56	79	98	35.7	18.328	0	0	0	0	0	0	0	0	0	0	0	0	0	0	0	0	0	0	0	0	0	0	0	0	0
9182184	2017-10-06	14:30:00	2	10	3	1	1	0	FIREWOOD	0	1	0	0	1	0	0		BODY SWELLING	120	100	113	92	36.6	17.7876	0	0	0	0	0	0	0	0	0	0	0	0	0	0	0	0	0	0	0	0	0	0	0	0	0
9182390	2017-10-12	10:34:00	2	19	3	1	1		CHARCOAL				0	1	0	0		AMENORRHOEA	125	75	113	86	37.1	29.259	0	0	0	0	0	0	0	0	0	0	0	0	0	0	0	0	0	0	0	0	0	0	0	0	0
9182404	2017-10-12	19:38:00	2	12	3	0	1	1	CHARCOAL	0	0	0	0	0	0	0		HYPOGRASTIC REGION PAIN	107	73	61	86	35.4	14.5453	0	0	0	0	0	0	0	0	0	0	0	0	0	0	0	0	0	0	0	0	0	0	0	0	0
260177	2017-04-08	18:50:00	2	10	3	1	1	0	CHARCOAL	1	0	0	0	1	0	0		EYELID RASH			122	96	36	13.365	0	0	0	0	0	0	0	0	0	0	0	0	0	0	0	0	0	0	0	0	0	0	0	0	0
9182549	2017-10-16	09:48:00	2	14	3	0	1	0	CHARCOAL	0	0	0	0	1	0	0		EYE PAIN	110	58	84	97	36.2	20.7897	0	0	0	0	0	0	0	0	0	1	0	0	0	0	0	0	0	0	0	0	0	0	0	0	0
9182555	2017-10-16	11:00:00	2	17	3	1	1		GAS				0	1	0	0		REDUCTION OF VISION	111	77	125	97	36.7	25.5588	0	0	0	0	0	0	0	0	0	0	0	0	0	0	0	0	0	0	0	0	0	0	0	0	0
91821165	2017-10-27	10:44:00	2	19	3	0	1		CHARCOAL				0	0	0	0		PHYSICAL AGGRESSION	140	70	76	99	37	21.1621	0	0	0	0	0	0	0	0	0	0	0	1	0	0	0	0	0	0	0	0	0	0	0	0	0
260140	2017-04-06	17:01:00	2	17	3	1	1	0	FIREWOOD	0	0	0	0	1	0	0		RIGHT EAR PAIN	114	71	93	98	35.4	29.9145	0	0	0	0	0	0	0	0	0	0	0	0	0	0	0	0	0	0	0	0	0	0	0	0	0
260421	2017-04-19	13:33:00	2	16	3	1	1	0	CHARCOAL	0	0	0	0	1	0	0		EAR PAIN	153	87	115	99	37.4	27.18	0	0	0	0	0	0	0	0	0	0	0	0	0	0	0	0	0	0	0	0	0	0	0	0	0
240417	2017-04-21	02:13:00	2	10	3	1	1	0	CHARCOAL	0	0	0	0	0	0	0		ABDOMINAL PAIN	100	60	86	97	38.8	13.5417	0	0	0	0	0	0	0	0	0	0	0	0	0	0	0	0	0	0	0	0	0	0	0	0	0
260452	2017-04-18	22:20:00	2	19	3	0	1	0	CHARCOAL	0	0	0	0	1	0	0		ABDOMINAL PAIN/DIARRHOEA/VOMITING	124	88	105	98	36.2	21.884	0	0	0	0	0	0	0	0	0	0	0	0	0	0	0	0	0	0	0	0	0	0	0	0	0
260531	2017-04-19	23:30:00	2	12	3	1	1	0	CHARCOAL	0	0	0	0	1	0	0		DIARRHOEA	96	68	105	98	37.3	17.3904	0	0	0	0	0	0	0	0	0	0	0	0	0	0	0	0	0	0	0	0	0	0	0	0	0
260679	2017-04-23	00:15:00	2	19	3	0	1	1	CHARCOAL	0	0	0	0	1	0	0		THROAT PAIN	157	84	90	99	36.8	18.7069	0	0	0	0	0	0	0	0	0	0	0	0	0	0	0	0	0	0	0	0	0	0	0	0	0
9182338	2017-10-10	22:47:00	2	19	3	1	1		CHARCOAL				0	0	0	0		EPIGASTRIC PAIN (ABDOMINAL)	136	90	115	99	37	23.9079	0	0	0	0	0	0	0	0	0	0	0	0	0	0	0	0	0	0	0	0	0	0	0	0	0
9182377	2017-10-11	22:36:00	2	17	3	0	1	0	CHARCOAL	0	0	0	0	1	0	0		STOMACH PAIN/DIARRHOEA	102	58	66	98	36	19.1358	0	0	0	0	0	0	0	0	0	0	0	0	0	0	0	0	0	0	0	0	0	0	0	0	0
9182399	2017-10-12	15:28:00	2	13	3	1	1		FIREWOOD				0	1	0	0		ABDOMINAL DISTENSION	80	56	109	99	35.8	17.0892	0	0	0	0	0	0	0	0	0	0	0	0	0	0	0	0	0	0	0	0	0	0	0	0	0
9182527	2017-10-15	21:00:00	2	17	3	0	1		CHARCOAL				0	1	0	0		DIARRHOEA/VOMITING	108	74	91	93	36.4	19.9168	0	0	0	0	0	0	0	0	0	0	0	0	0	0	0	0	0	0	0	0	0	0	0	0	0
9182535	2017-10-16	06:04:00	2	14	3	0	1		CHARCOAL				0	1	0	0		DIARRHOEA	108	99	100	97	37.4	17.3386	0	0	0	0	0	0	0	0	0	0	0	0	0	0	0	0	0	0	0	0	0	0	0	0	0
9182581	2017-10-16	20:06:00	2	17	3	1	1		CHARCOAL+GAS				0	1	0	0		EPIGASTRIC PAIN	125	83	79	98	36.2	18.125	0	0	0	0	0	0	0	0	0	0	0	0	0	0	0	0	0	0	0	0	0	0	0	0	0
9182647	2017-10-17	20:45:00	2	19	3	0	1		CHARCOAL				0	0	0	0		ABDOMINAL PAIN	154	105	71	98	37.1	25.6874	0	0	0	0	0	0	0	0	0	0	0	0	0	0	0	0	0	0	0	0	0	0	0	0	0
9182708	2017-10-18	20:44:00	2	14	3	1	1		CHARCOAL				0	0	0	0		WATERY DIARRHOEA	117	78	75	99	36.4	24.8751	0	0	0	0	0	0	0	0	0	0	0	0	0	0	0	0	0	0	0	0	0	0	0	0	0
91821256	2017-10-29	10:59:00	2	17	3	0	1		CHARCOAL				0	0	0	0		EPIGASTRIC ABDOMINAL PAIN	116	55	79	98	36	17.9918	0	0	0	0	0	0	0	0	0	0	0	0	0	0	0	0	0	0	0	0	0	0	0	0	0
240127	2017-04-06	13:15:00	2	11	3	0	1	0	CHARCOAL	0	0	0	0	1	0	0		FEVER	83	57	152	95	40.1	12.1766	0	0	0	0	0	0	0	0	0	0	0	0	0	0	0	0	0	0	0	0	0	0	0	0	0
260335	2017-04-15	10:00:00	2	16	3	1	1	0	CHARCOAL	0	0	0	0	0	0	0		DIZZINESS/WEAKNESS	100	77	90	98	35.8	19.303	0	0	0	0	0	0	0	0	0	0	0	0	0	0	0	0	0	0	0	0	0	0	0	0	0
9182597	2017-10-17	08:03:00	2	19	3	1	1		CHARCOAL				0	0	0	0		ABDOMINAL PAIN	115	59	129	99	36.2	20.5761	0	0	0	0	0	0	0	0	0	0	0	0	0	0	0	0	0	0	0	0	0	0	0	0	0
9182633	2017-10-17	16:00:00	2	18	3	1	1		CHARCOAL				0	1	0	0		HEADACHE/FEVER	112	78	93	98	36	22.4996	0	0	0	0	0	0	0	0	0	0	0	0	0	0	0	0	0	0	0	0	0	0	0	0	0
260360	2017-04-16	09:10:00	2	15	3	1	1	0	CHARCOAL	1	0	0	0	0	0	0		ABSCESS IN THE RIGHT EAR	110	74	114	99	36.8	21.1905	0	0	0	0	0	0	0	0	0	0	0	0	0	0	0	0	0	0	0	0	0	0	0	0	0
240078	2017-04-03	21:40:00	2	19	3	1	1	0	CHARCOAL	0	0	0	0	1	0	0			126	82	65	94	37.6	17.6813	0	0	0	0	0	0	0	0	0	0	0	0	0	0	0	0	0	0	0	0	0	0	0	0	0
240101	2017-04-05	10:50:00	2	10	3	0	1	0	CHARCOAL	0	0	0	0	1	0	0		COUGH			75	91	35.4	13.3796	0	0	0	0	0	0	0	0	0	0	0	0	0	0	0	0	0	0	0	0	0	0	0	0	0
240111	2017-04-05	08:35:00	2	16	3	0	1	0	CHARCOAL	0	0	0	0	1	0	0		FEVER	109	61	71	85	37.3	19.9704	0	0	0	0	0	0	0	0	0	0	0	0	0	0	0	0	0	0	0	0	0	0	0	0	0
240113	2017-04-05	15:00:00	2	12	3	1	1	0	CHARCOAL	0	0	0	0	1	0	0		ABDOMINAL PAIN/VOMITING	89	58	53	94	39.2	15.5285	0	0	0	0	0	0	0	0	0	0	0	0	0	0	0	0	0	0	0	0	0	0	0	0	0
240129	2017-04-06	18:55:00	2	12	3	0	1	0	CHARCOAL	0	0	0	0	1	0	0		FEVER	113	75	136	94	38	20.4861	0	0	0	0	0	0	0	0	0	0	0	0	0	0	0	0	0	0	0	0	0	0	0	0	0
240131	2017-04-05	05:07:00	2	11	3	0	1	0	CHARCOAL	0	0	0	0	1	0	0		HEADACHE/FEVER	100	85	82	84	37.8	20.6897	0	0	0	0	0	0	0	0	0	0	0	0	0	0	0	0	0	0	0	0	0	0	0	0	0
240159	2017-04-07	09:20:00	2	14	3	0	1	0	FIREWOOD	0	0	0	0	1	0	0		FEVER	123	69	73	96	35.8	17.7408	0	0	0	0	0	0	0	0	0	0	0	0	0	0	0	0	0	0	0	0	0	0	0	0	0
240217	2017-04-11	14:15:00	2	16	3	0	1	0	FIREWOOD	0	0	0	0	1	0	0		HEADACHE	111	64	94	98	36.1	17.7509	0	0	0	0	0	0	0	0	0	0	0	0	0	0	0	0	0	0	0	0	0	0	0	0	0
240292	2017-04-13	13:23:00	2	15	3	1	1	0	CHARCOAL	0	0	0	0	1	0	0		FEVER	74	55	141	96	36.7	12.0512	0	0	0	0	0	0	0	0	0	0	0	0	0	0	0	0	0	0	0	0	0	0	0	0	0
240363	2017-04-17	08:09:00	2	16	3	0	1	0	CHARCOAL	0	1	0	0	0	0	0		DIARRHOEA	98	68	107	95	37.6	18.3883	0	0	0	0	0	0	0	0	0	0	0	0	0	0	0	0	0	0	0	0	0	0	0	0	0
240370	2017-04-17	09:21:00	2	18	3	1	1	0	CHARCOAL	0	0	0	0	0	0	0		FEVER	111	75	75	98	36	21.8418	0	0	0	0	0	0	0	0	0	0	0	0	0	0	0	0	0	0	0	0	0	0	0	0	0
240469	2017-04-22	07:01:00	2	19	3	0	1	0	CHARCOAL	0	1	1	0	1	0	0		HEADACHE	130	70	98	95	38.7	21.9555	0	0	0	0	0	0	0	0	0	0	0	0	0	0	0	0	0	0	0	0	0	0	0	0	0
240485	2017-04-21	11:30:00	2	14	3	1	1	0	CHARCOAL	0	0	0	0	1	0	0		FEVER	95	59	129	92	35.5	18.902	0	0	0	0	0	0	0	0	0	0	0	0	0	0	0	0	0	0	0	0	0	0	0	0	0
240545	2017-04-29	13:10:00	2	11	3	0	1	0	CHARCOAL	0	0	0	0	1	0	0		VOMITING/FEVER	111	74	115	98	36.1	16.7347	0	0	0	0	0	0	0	0	0	0	0	0	0	0	0	0	0	0	0	0	0	0	0	0	0
240546	2017-04-29	09:55:00	2	10	3	0	1	0	CHARCOAL	0	0	0	0	1	0	0		PAIN WHEN URINATING	109	64	95	96	33.9	17.8886	0	0	0	0	0	0	0	0	0	0	0	0	0	0	0	0	0	0	0	0	0	0	0	0	0
240555	2017-04-30	05:43:00	2	16	3	1	1	0	CHARCOAL	0	0	0	0	1	0	0		HEADACHE/FEVER	89	60	125	96	36.9	18.5529	0	0	0	0	0	0	0	0	0	0	0	0	0	0	0	0	0	0	0	0	0	0	0	0	0
260001	2017-04-02	07:55:00	2	17	3	1	1	1	CHARCOAL	0	0	0	0	1	0	0		ABDOMINAL PAIN/FEVER	106	67	124	96	39.6	25.072	0	0	0	0	0	0	0	0	0	0	0	0	0	0	0	0	0	0	0	0	0	0	0	0	0
260018	2017-04-02	17:23:00	2	14	3	0	1	1	CHARCOAL	0	0	0	0	1	0	0		FEVER	107	59	110	98	39.1	17.3828	0	0	0	0	0	0	0	0	0	0	0	0	0	0	0	0	0	0	0	0	0	0	0	0	0
260061	2017-04-04	18:00:00	2	19	3	1	1	0	FIREWOOD	0	0	0	0	1	0	0		HEADACHE/WOUND IN THE MOUTH	126	78	118	98	37.9	21.7914	0	0	0	0	0	0	0	0	0	0	0	0	0	0	0	0	0	0	0	0	0	0	0	0	0
260155	2017-04-08	12:50:00	2	18	3	1	1	0	CHARCOAL	0	0	0	0	1	0	0		DIARRHOEA/VOMITING/FEVER	112	76	90	99	37.2	20.3244	0	0	0	0	0	0	0	0	0	0	0	0	0	0	0	0	0	0	0	0	0	0	0	0	0
260347	2017-04-15	09:40:00	2	18	3	1	1	0	CHARCOAL	0	0	0	0	0	0	0		URINE WITH BLOOD	104	68	74	99	36.7	21.7513	0	0	0	0	0	0	0	0	0	0	0	0	0	0	0	0	0	0	0	0	0	0	0	0	0
260375	2017-04-16	17:50:00	2	18	3	1	1	0	CHARCOAL	0	0	0	0	0	0	0		DIARRHOEA/FEVER	105	86	109	98	35.8	18.4685	0	0	0	0	0	0	0	0	0	0	0	0	0	0	0	0	0	0	0	0	0	0	0	0	0
260385	2017-04-16	20:34:00	2	15	3	0	1	0		0	1	0	0	1	0	0		FEVER/DIARRHOEA	85	62	120	99	37.8	22.1003	0	0	0	0	0	0	0	0	0	0	0	0	0	0	0	0	0	0	0	0	0	0	0	0	0
260431	2017-04-19	17:51:00	2	14	3	1	1	0	CHARCOAL	0	0	0	0	1	0	0		HEADACHE	118	77	92	98	36	20.7185	0	0	0	0	0	0	0	0	0	0	0	0	0	0	0	0	0	0	0	0	0	0	0	0	0
260447	2017-04-15	21:00:00	2	19	3	1	1	0	CHARCOAL	0	0	0	0	1	0	0		FEBRILE SYNDROME	96	52	108	98	35.4	18.6966	0	0	0	0	0	0	0	0	0	0	0	0	0	0	0	0	0	0	0	0	0	0	0	0	0
260466	2017-04-20	12:30:00	2	15	3	0	1	0	CHARCOAL	0	1	0	0	1	0	0		FEVER	116	73	96	97	39.6	19.1742	0	0	0	0	0	0	0	0	0	0	0	0	0	0	0	0	0	0	0	0	0	0	0	0	0
260535	2017-04-18	05:40:00	2	18	3	0	1	0	CHARCOAL	0	0	0	0	1	0	0		HEADACHE	113	88	91	89	36.7	24.4995	0	0	0	0	0	0	0	0	0	0	0	0	0	0	0	0	0	0	0	0	0	0	0	0	0
260667	2017-04-22	14:00:00	2	10	3	1	1	0	CHARCOAL	0	0	0	0	1	0	0		FEVER/HEADACHE	95	59	90	97	38.9	17.9471	0	0	0	0	0	0	0	0	0	0	0	0	0	0	0	0	0	0	0	0	0	0	0	0	0
260677	2017-04-24	05:36:00	2	12	3	1	1	1	CHARCOAL	0	0	0	0	1	0	0		FEVER/HEADACHE/MYALGIA	99	59	122	99	38.9	15.8667	0	0	0	0	0	0	0	0	0	0	0	0	0	0	0	0	0	0	0	0	0	0	0	0	0
260696	2017-04-26	09:02:00	2	13	3	1	1	0	CHARCOAL	0	0	0	0	0	0	0		HEADACHE	109	71	93	95	35.8	18.0845	0	0	0	0	0	0	0	0	0	0	0	0	0	0	0	0	0	0	0	0	0	0	0	0	0
918247	2017-10-03	06:04:00	2	18	3	1	1	0	CHARCOAL	0	0	0	0	1	0	0		GENITAL PAIN	125	72	88	99	36.6	18.7668	0	0	0	0	0	0	0	0	0	0	0	0	0	0	0	0	0	0	0	0	0	0	0	0	0
9182146	2017-10-05	10:49:00	2	14	3	0	1		CHARCOAL				0	1	0	0		ITCH/COUGH/PIMPLES	100	69	112	92	37.2	35.5388	0	0	0	0	0	0	0	0	0	0	0	0	0	0	0	0	0	0	0	0	0	0	0	0	0
9182151	2017-10-05	20:11:00	2	19	3	1	1	0	CHARCOAL+ELECTRICITY	1	0	0	0	1	0	0		HEADACHE/FEVER	134	89	96	99	36	27.4681	0	0	0	0	0	0	0	0	0	0	0	0	0	0	0	0	0	0	0	0	0	0	0	0	0
9182196	2017-10-07	20:01:00	2	19	3	0	1		CHARCOAL				0	1	0	0		HEADACHE/FEVER	122	63	155	99	38.6	48.3226	0	0	0	0	0	0	0	0	0	0	1	0	0	0	0	0	0	0	0	0	0	0	0	0	0
9182214	2017-10-07	16:48:00	2	14	3	1	1	0	CHARCOAL	0	0	0	0	1	0	0		DIARRHOEA/VOMITING	112	71	84	98	37.2	24.3496	1	0	0	0	0	0	0	0	0	0	0	0	0	0	0	0	0	0	0	0	0	0	0	0	0
9182531	2017-10-15	22:42:00	2	10	3	1	1	0	CHARCOAL	1	1	0	0	1	0	0		FEVER	130	90	90		39	19.1111	0	0	0	0	0	0	0	0	0	0	0	0	0	0	0	0	0	0	0	0	0	0	0	0	0
9182551	2017-10-16	10:10:00	2	19	3	0	1	0	CHARCOAL	1	0	0	0	1	0	0		DIARRHOEA	141	79	75	99	36.6	20.4311	0	0	0	0	0	0	0	0	0	0	0	0	0	0	0	0	0	0	0	0	0	0	0	0	0
9182562	2017-10-16	12:12:00	2	18	3	0	1	0	CHARCOAL	1	1	0	0	0	0	0		DIARRHOEA	146	84	66	99	36.6	23.072	0	0	0	0	0	0	0	0	0	0	0	0	0	0	0	0	0	0	0	0	0	0	0	0	0
9182738	2017-10-19	11:04:00	2	18	3	0	1		CHARCOAL				0	0	0	0		PIMPLES/GENITAL ITCHING	145	83	116	98	36.8	24.6094	0	0	0	0	0	0	0	0	0	0	0	0	0	0	0	0	0	0	0	0	0	0	0	0	0
9182856	2017-10-21	17:07:00	2	11	3	1	1		CHARCOAL				0	0	0	0		FEVER/FLU	118	81	114	99	37.7	17.7137	0	0	0	0	0	0	0	0	0	0	0	0	0	0	0	0	0	0	0	0	0	0	0	0	0
9182919	2017-10-22	18:43:00	2	10	3	1	1	0	CHARCOAL+GAS	1	0	1	0	1	0	0		FEVER	90	60	80	98	37	16.5993	0	0	0	0	0	0	0	0	0	0	0	0	0	0	0	0	0	0	0	0	0	0	0	0	0
9182984	2017-10-23	19:44:00	2	19	3	0	1		CHARCOAL+GAS				0	1	0	0		SHIVERS				98	36.4	20.2848	0	0	0	0	0	0	0	0	0	0	0	0	0	0	0	0	0	0	0	0	0	0	0	0	0
9182989	2017-10-23	21:51:00	2	19	3	0	1		CHARCOAL				0	1	0	0		COUGH WITH BLOOD	106	72	78	98	36.4	19.8141	0	0	0	0	0	0	0	0	0	0	0	0	0	0	0	0	0	0	0	0	0	0	0	0	0
91821036	2017-10-24	19:40:00	2	19	3	1	1		GAS+CHARCOAL				0	1	0	0		NECK PAIN	114	75	91	99	36.9	33.2051	0	0	0	0	0	0	0	0	0	0	0	0	0	0	0	0	0	0	0	0	0	0	0	0	0
91821125	2017-10-26	15:24:00	2	16	3	1	1		FIREWOOD				0	1	0	0		HEADACHE	115	75	103	91	35.8	19.6921	0	0	0	0	0	0	0	0	0	0	0	0	0	0	0	0	0	0	0	0	0	0	0	0	0
91821199	2017-10-29	06:56:00	2	17	3	1	1		CHARCOAL				0	1	0	0		FEVER	120	75	103	99	37.1	31.8339	0	0	0	0	0	0	0	0	0	0	0	0	0	0	0	0	0	0	0	0	0	0	0	0	0
91821200	2017-10-28	08:00:00	2	11	3	0	1	0	CHARCOAL	1	1	0	1	0	0	0		FEVER	90	60	55	92	37.6	14.1723	0	0	0	0	0	0	0	0	0	0	0	0	0	0	0	0	0	0	0	0	0	0	0	0	0
91821211	2017-10-28	10:07:00	2	19	3	0	1		CHARCOAL				0	0	0	0		INFECTION	137	81	92	99	36.4	19.301	0	0	0	0	0	0	0	0	0	0	0	0	0	0	0	0	0	0	0	0	0	0	0	0	0
91821217	2017-10-28	12:15:00	2	15	3	1	1		CHARCOAL				0	1	0	0		GENERAL MALAISE			120		36.4		0	0	0	0	0	0	0	0	0	0	0	0	0	0	0	0	0	0	0	0	0	0	0	0	0
91821271	2017-10-29	17:12:00	2	11	3	0	1	0	CHARCOAL	1	0	0	0	1	0	0		HEADACHE/FEVER/ARTHRALGIA	101	68	134		39.4	24.7796	0	0	0	0	0	0	0	0	0	0	0	0	0	0	0	0	0	0	0	0	0	0	0	0	0
91821298	2017-10-30	09:57:00	2	15	3	0	1	0	CHARCOAL	1	0	0	0	1	0	0		FEVER/HEADACHE	85	64	108		36.3	15.2288	0	0	0	0	0	0	0	0	0	0	0	0	0	0	0	0	0	0	0	0	0	0	0	0	0
91821316	2017-10-30	16:36:00	2	11	3	1	1		CHARCOAL				0	0	0	0		FEVER	105	66	117	99	38.5	24.1427	0	0	0	0	0	0	0	0	0	0	0	0	0	0	0	0	0	0	0	0	0	0	0	0	0
91821320	2017-10-30	20:25:00	2	18	3	1	1		CHARCOAL				0	1	0	0		DIARRHOEA/VOMITING	74	55	91	74	34.6	21.2585	0	0	0	0	0	0	0	0	0	0	0	0	0	0	0	0	0	0	0	0	0	0	0	0	0
91821327	2017-10-31	05:41:00	2	18	3	0	1		FIREWOOD				0	1	0	0		COUGH WITH BLOOD	106	72	144	97	36	16.9204	0	0	0	0	0	0	0	0	0	0	0	0	0	0	0	0	0	0	0	0	0	0	0	0	0
91821328	2017-10-31	05:44:00	2	13	3	1	1		CHARCOAL				0	1	0	0		VOMITING/DIARRHOEA	176	80	98	97	35.5	18.902	0	0	0	0	0	0	0	0	0	0	0	0	0	0	0	0	0	0	0	0	0	0	0	0	0
260650	2017-04-28		2	16	3	0	1	0	CHARCOAL	0	0	0	0	0	0	0		DIFFICULTY BREATHING					36.5		0	0	0	0	0	0	0	0	0	0	0	0	0	0	0	0	0	0	0	0	0	0	0	0	0
9182936	2017-10-23	05:55:00	2	13	3	0	1											PHYSICAL AGGRESSION	118	79	103	98	36.6	21.3281	0	0	0	0	0	0	0	0	0	0	0	1	0	0	0	0	0	0	0	0	0	0	0	0	0
91821244	2017-10-29	08:21:00	2	18	3	1	1		CHARCOAL									PHYSICAL AGGRESSION	117	72	91		36.7	21.5114	0	0	0	0	0	0	0	0	0	0	0	1	0	0	0	0	0	0	0	0	0	0	0	0	0
9182161	2017-10-06	23:13:00	2	18	3	0	1		CHARCOAL+ELECTRICITY									POLYTRAUMA	126	81	68	99	37	17.6953	0	0	0	0	0	0	0	0	0	0	0	0	0	0	0	0	0	0	0	0	0	0	0	0	0
9182165	2017-10-06	15:53:00	2	16	3	0	1		FIREWOOD									LEFT SHOULDER PAIN	126	64	78	98	37.3	21.5287	0	0	0	0	0	0	0	0	0	0	0	0	1	0	0	0	0	0	0	0	0	0	0	0	0
9182176	2017-10-06	15:18:00	2	10	3	0	1		FIREWOOD									LEFT ELBOW TRAUMA	120	80	114	98	38.4	13.7418	0	0	0	0	0	0	0	0	0	0	0	0	0	0	1	0	0	0	0	0	0	0	0	0	0
9182286	2017-10-09	14:51:00	2	18	3	0	1		CHARCOAL									RIGHT FOOT PAIN	121	72	92	92	37.2	19.3965	0	1	0	0	0	0	0	0	0	0	0	0	0	0	0	0	0	0	0	0	0	0	0	0	0
9182351	2017-10-11	09:25:00	2	10	3	0	1		CHARCOAL									LEFT ARM PAIN			68	98	36.1	14.7929	0	0	0	0	0	0	0	0	0	0	0	0	0	0	1	0	0	0	0	0	0	0	0	0	0
9182462	2017-10-14	10:50:00	2	19	3	1	1		CHARCOAL									RIGHT FOOT PAIN	121	69	74	99	36.4	20.6499	0	1	0	0	0	0	0	0	0	0	0	0	0	0	0	0	0	0	0	0	0	0	0	0	0
9182475	2017-10-14	18:26:00	2	17	3	1	1		CHARCOAL									WOUND	140	73	91		37.3	27.0703	0	0	0	0	0	0	0	0	0	0	0	0	0	0	0	0	0	0	0	1	0	0	0	0	0
9182505	2017-10-15	15:19:00	2	15	3	1	1		CHARCOAL									AGGRESSION	105	69	106	99	36.8	22.9931	0	0	0	0	0	1	0	0	0	0	0	0	0	0	0	0	0	0	0	0	0	0	0	0	0
9182516	2017-10-15	17:49:00	2	15	3	0	1		CHARCOAL									FALL	107	68	93	99	36.6	21.6441	0	0	0	0	0	0	0	0	0	0	0	0	0	0	0	1	0	0	0	0	0	0	0	0	0
9182632	2017-10-17	15:38:00	2	13	3	0	1		CHARCOAL									LEFT ANKLE PAIN	118	80	139	99	36.6	17.6315	0	0	0	0	0	0	0	0	0	0	0	0	0	0	0	0	0	0	0	1	0	0	0	0	0
9182843	2017-10-21	14:12:00	2	18	3	0	1		CHARCOAL									HEADACHE	107	57	155	98	37.5	21.1927	0	0	0	0	0	0	0	0	0	0	0	1	0	0	0	0	0	0	0	0	0	0	0	0	0
9182833	2017-10-21	12:06:00	2	14	3	0	1		CHARCOAL									SHOULDER PAIN							0	0	0	0	0	0	0	0	0	0	0	0	0	0	0	0	0	0	0	0	0	0	0	0	0
9182276	2017-10-09	09:53:00	2	17	3	1	1	0	CHARCOAL	1	0	0						VAGINAL BLEEDING	124	78	116	98	36.7	26.8848	0	0	0	0	0	0	0	0	0	0	0	0	0	0	0	0	0	0	0	0	0	0	0	0	0
91821207	2017-10-28	09:26:00	2	15	3	1	1		CHARCOAL									ABDOMINAL PAIN	118	67	104		37	27.0552	0	0	0	0	0	0	0	0	0	0	0	0	0	0	0	0	0	0	0	0	0	0	0	0	0
9182925	2017-10-22	20:46:00	2	12	3	0	1	1	CHARCOAL	0	0	0						FEVER/HEMATOCHEZIA			83	62	38.2	15.013	0	0	0	0	0	0	0	0	0	0	0	0	0	0	0	0	0	0	0	0	0	0	0	0	0
91821004	2017-10-24	09:08:00	2	18	3	0	1		CHARCOAL									INCREASED VOLUME OF RIGHT INGUINAL REGION	127	83	57	99	36.8	21.6819	0	0	0	0	0	0	0	0	0	0	0	0	0	0	0	0	0	0	0	0	0	0	0	0	0
9182476	2017-10-14	18:43:00	2	19	3	1	1		CHARCOAL									DIZZINESS/COLLAPSED	144	87	88		37.1	23.6861	0	0	0	0	0	0	0	0	0	0	0	0	0	0	0	0	0	0	0	0	0	0	0	0	0
9182148	2017-10-05	15:00:00	2	19	3	0	1	0	GAS	0	0	0						FEVER	145	71	64	99	37.1	21.0802	0	0	0	0	0	0	0	0	0	0	0	0	0	0	0	0	0	0	0	0	0	0	0	0	0
9182270	2017-10-09	08:45:00	2	19	3	0	1	0	CHARCOAL	1	0	0						FEVER	132	87	91	99	36.9	26.4	0	0	0	0	0	0	0	0	0	0	0	0	0	0	0	0	0	0	0	0	0	0	0	0	0
9182832	2017-10-21	11:28:00	2	16	3	1	1		CHARCOAL+ELECTRICITY									DIARRHOEA/ABDOMINAL PAIN	95	58	101	99	36.4	18.1862	0	0	0	0	0	0	0	0	0	0	0	0	0	0	0	0	0	0	0	0	0	0	0	0	0
240156	2017-04-07	13:10:00	2	29	4	0	1	0	CHARCOAL	1	0	0	0	1	1	0		HEADACHE	171	106	85	98	37	29.7959	0	0	0	0	0	0	0	0	0	0	0	0	0	0	0	0	0	0	0	0	0	0	0	0	0
240218	2017-04-11	14:07:00	2	48	4	0	1	0	FIREWOOD	0	0	0	0	1	1	0		HEADACHE	154	100	74	98	36.4	23.4607	0	0	0	0	0	0	0	0	0	0	0	0	0	0	0	0	0	0	0	0	0	0	0	0	0
240256	2017-04-10	06:30:00	2	55	4	1	1	0	CHARCOAL	0	0	0	0	1	1	0		HEADACHE	263	138	91		35	35.838	0	0	0	0	0	0	0	0	0	0	0	0	0	0	0	0	0	0	0	0	0	0	0	0	0
240260	2017-04-10	21:05:00	2	43	4	0	1	0	CHARCOAL	1	0	0	0	1	1	0		FEVER/HEADACHE	171	126	86	95	35.7	28.2923	0	0	0	0	0	0	0	0	0	0	0	0	0	0	0	0	0	0	0	0	0	0	0	0	0
240440	2017-04-22	07:26:00	2	49	4	1	1	1	CHARCOAL	1	0	0	0	1	1	0		HEADACHE	160	100	69	99	36.2	28.959	0	0	0	0	0	0	0	0	0	0	0	0	0	0	0	0	0	0	0	0	0	0	0	0	0
260040	2017-04-03		2	28	4	0	1	0	CHARCOAL	0	0	0	0	0	1	0		DIFFICULTY BREATHING	152	127	53	93	35.6	20.6428	0	0	0	0	0	0	0	0	0	0	0	0	0	0	0	0	0	0	0	0	0	0	0	0	0
260640	2017-04-27	11:25:00	2	52	4	0	1	0	CHARCOAL	1	0	0	0	1	1	0		HEADACHE	160	98	85	98	35.5	21.1026	0	0	0	0	0	0	0	0	0	0	0	0	0	0	0	0	0	0	0	0	0	0	0	0	0
240193	2017-04-10		2	28	4	1	1	1		0	0	0	0	1	1	0		LOWER LIMB OEDEMA/DIFFICULTY BREATHING	106	66	100	77	35.7	45.4379	0	0	0	0	0	0	0	0	0	0	0	0	0	0	0	0	0	0	0	0	0	0	0	0	0
260159	2017-04-08	15:25:00	2	36	4	1	1	0	CHARCOAL	1	0	1	1	1	1	0		PHYSICAL AGGRESSION	93	60	113	96	37.2	18.3141	0	0	0	0	0	0	0	0	0	0	0	0	0	0	0	0	0	0	0	0	0	0	0	0	0
260615	2017-04-22	09:00:00	2	41	4	0	1	0	CHARCOAL	0	0	0	0	1	1	0		COUGH/FEVER	130	89	85	94	35.9	20.2374	0	0	0	0	0	0	0	0	0	0	0	0	0	0	0	0	0	0	0	0	0	0	0	0	0
9182147	2017-10-05	14:39:00	2	24	4	0	1		CHARCOAL				0	1	1	0		FEVER/HEADACHE	145	74	58	99	36.5	29.7796	0	0	0	0	0	0	0	0	0	0	0	0	0	0	0	0	0	0	0	0	0	0	0	0	0
9182257	2017-10-08	20:58:00	2	47	4	1	1		CHARCOAL				0	1	1	0		FEVER	135	78	88	98	37.2	25.3444	0	0	0	0	0	0	0	0	0	0	0	0	0	0	0	0	0	0	0	0	0	0	0	0	0
9182522	2017-10-15	19:50:00	2	28	4	0	1		CHARCOAL				0	1	1	0		ABDOMINAL DISTENSION	117	102	133	96	37.9	29.4825	0	0	0	0	0	0	0	0	0	0	0	0	0	0	0	0	0	0	0	0	0	0	0	0	0
240007	2017-04-01	09:37:00	2	45	4	1	1	0		0	0	0	0	1	1	0		BACK PAIN	143	91	98	98	37.2	27.3995	0	0	0	0	0	0	0	0	0	0	0	0	0	0	0	0	0	0	0	0	0	0	0	0	0
240071	2017-04-03	14:30:00	2	46	4	0	1	0	CHARCOAL	0	0	0	0	1	1	0		LEFT LEG WOUND	165	111	124	99	37.2	20.9483	0	0	0	0	0	0	0	0	0	0	0	0	0	0	0	0	0	0	0	1	0	0	0	0	0
240151	2017-04-07	15:45:00	2	28	4	0	1	0	CHARCOAL	0	0	0	0	1	1	0		LEFT FOREARM PAIN	133	82	78	95	35.8	21.3039	0	0	0	0	0	0	0	0	0	0	0	0	0	1	0	0	0	0	0	0	0	0	0	0	0
240155	2017-04-07	12:50:00	2	24	4	0	1	0	CHARCOAL	0	0	0	0	1	1	0		PAIN IN THE RIGHT EYE	140	77	101	97	37.2	23.4235	0	0	0	0	0	0	0	0	0	0	0	1	0	0	0	0	0	0	0	0	0	0	0	0	0
240166	2017-04-07	15:35:00	2	39	4	0	1	0	FIREWOOD	1	0	0	0	1	1	0		HEAD PAIN/BREAST PAIN	130	79	85	98	36.6	23.5304	0	0	0	0	0	0	0	0	0	0	0	1	0	0	0	0	0	0	0	0	0	0	0	0	0
240167	2017-04-07	18:30:00	2	26	4	0	1	0	CHARCOAL	0	0	0	0	1	1	0		RIGHT WRIST PAIN	130	78	94	96	39.1	18.775	0	0	0	0	0	1	0	0	0	0	0	0	0	0	0	0	0	0	0	0	0	0	0	0	0
240168	2017-04-07	16:00:00	2	74	4	0	1	0	CHARCOAL	1	0	0	0	1	1	0		HEADACHE	196	103	75	97	36.8	21.5139	0	0	0	0	0	0	0	0	0	0	0	1	0	0	0	0	0	0	0	0	0	0	0	0	0
240211	2017-04-11	10:27:00	2	30	4	0	1	0	CHARCOAL	0	1	0	0	1	1	0		PAIN IN RIGHT CLAVICLE	139	77	73	96	36.6	21.2263	0	0	0	0	0	0	0	0	1	0	0	0	0	0	0	0	0	0	0	0	0	0	0	0	0
240238	2017-04-08	06:52:00	2	32	4	0	1	0	CHARCOAL	0	0	0	0	1	1	0		INCISED WOUND ON PENIS	112	80	77	92	36.8	20.0551	0	0	0	0	0	0	0	0	0	0	0	0	0	0	0	0	0	0	0	0	0	0	0	1	0
240324	2017-04-13	14:44:00	2	58	4	0	1	0	CHARCOAL	0	0	0	0	1	1	0		RIGHT ELBOW PAIN	111	77	92	98	36.6	19.1577	0	0	0	0	0	0	1	0	0	0	0	0	0	0	0	0	0	0	0	0	0	0	0	0	0
240354	2017-04-14	19:40:00	2	51	4	0	1	0	CHARCOAL	0	1	0	0	1	1	0		HEADACHE	131	81	113	98	36.1	24.1322	0	0	0	0	0	0	0	0	0	0	0	1	0	0	0	0	0	0	0	0	0	0	0	0	0
240476	2017-04-21	16:06:00	2	25	4	0	1	0	CHARCOAL	0	0	0	0	1	1	0		LEFT ANKLE PAIN	136	82	105	98	37.3	20.5693	0	0	0	0	0	0	0	0	0	0	0	0	0	0	0	0	0	0	0	1	0	0	0	0	0
260054	2017-04-04	16:46:00	2	23	4	0	1	0	CHARCOAL	0	1	0	0	1	1	0		TRAUMA OF THE MIDDLE FINGER OF THE RIGHT HAND	105	63	87	99	36.4	39.6106	0	0	0	0	0	1	0	0	0	0	0	0	0	0	0	0	0	0	0	0	0	0	0	0	0
260056	2017-04-04	16:16:00	2	26	4	1	1	0	GAS	0	0	1	0	1	1	0		LEFT ARM PAIN	109	73	89	97	36.6	22.232	0	0	0	0	0	0	0	0	0	0	0	0	0	1	0	0	0	0	0	0	0	0	0	0	0
260314	2017-04-10	16:55:00	2	50	4	0	1	0	CHARCOAL	0	0	0	0	1	1	0		PAIN IN FIFTH RIGHT TOE	133	92	70	98	36.8	24.1238	0	1	0	0	0	0	0	0	0	0	0	0	0	0	0	0	0	0	0	0	0	0	0	0	0
260440	2017-04-14	10:35:00	2	36	4	0	1	0	CHARCOAL	0	0	0	0	1	1	0		RIGHT ANKLE PAIN	126	70	80	98	36.2	23.1291	0	1	0	0	0	0	0	0	0	0	0	0	0	0	0	0	0	0	0	0	0	0	0	0	0
260507	2017-04-18	11:45:00	2	42	4	0	1	0	CHARCOAL	0	0	0	0	1	1	0		RIGHT CHEST PAIN	129	80	80	95	36.8	22.3133	0	1	0	0	0	0	0	0	0	0	0	0	0	0	0	0	0	0	0	0	0	0	0	0	0
260508	2017-04-18	11:30:00	2	51	4	0	1	0	CHARCOAL	1	0	0	0	1	1	0		PAIN IN THE RIGHT KNEE	150	105	82	98	37	32.7179	0	0	0	1	0	0	0	0	0	0	0	0	0	0	0	0	0	0	0	0	0	0	0	0	0
260604	2017-04-27	08:00:00	2	35	4	0	1	0	CHARCOAL	0	0	0	1	1	1	0		TESTICULAR PAIN	123	76	100	96	37.4	24.6914	0	0	0	0	0	0	0	0	0	0	0	0	0	0	0	0	0	0	0	0	0	0	0	1	0
260724	2017-04-30	10:00:00	2	29	4	1	1	0	CHARCOAL	0	0	0	0	1	1	0		LEFT ELBOW PAIN	104	77	93	98	36.5	18.5333	0	0	0	0	0	0	0	0	0	0	0	0	0	0	1	0	0	0	0	0	0	0	0	0	0
91821	2017-10-01	07:19:00	2	68	4	0	1	0	FIREWOOD	1	0	0	0	0	1	0		HIP PAIN	200	141	82		36.7	18.3585	0	0	0	0	0	0	0	0	0	0	0	0	0	0	0	0	0	0	0	0	0	0	0	0	0
9182142	2017-10-05	10:59:00	2	23	4	0	1		CHARCOAL				0	1	1	0		WOUND	146	71	60	99	36.6	22.8287	0	0	0	0	0	0	0	0	0	0	0	1	0	0	0	0	0	0	0	0	0	0	0	0	0
9182197	2017-10-07	22:28:00	2	23	4	1	1		CHARCOAL				0	1	1	0		WHOLE BODY ACHE	120	99	87	96	37	24.8408	0	0	0	0	0	0	0	0	0	0	0	0	0	0	0	0	0	0	0	0	0	0	0	0	0
9182228	2017-10-08	06:48:00	2	25	4	1	1		CHARCOAL				0	1	1	0		PHYSICAL AGGRESSION	93	66	102	99	36.5	24.1333	0	0	0	0	0	0	0	0	0	0	0	0	0	0	0	0	0	0	0	0	1	0	0	0	0
918253	2017-10-03	10:36:00	2	26	4	1	1	0	CHARCOAL	0	0	0	0	0	1	0		HUMAN BITE	102	62	88	90	36.4	21.4031	0	0	1	0	0	0	0	0	1	0	0	0	0	0	0	0	0	0	0	0	0	0	0	0	0
240019	2017-04-01	13:07:00	2	24	4	1	1	0	GAS+CHARCOAL	1	0	0	0	1	1	0		PAIN ON SWALLOWING	114	76	72	94	37.4	22.742	0	0	0	0	0	0	0	0	0	0	0	0	0	0	0	0	0	0	0	0	0	0	0	0	0
240023	2017-04-01		2	25	4	0	1	0	CHARCOAL	0	1	0	0	1	1	0		DIFFICULTY BREATHING	143	79	131	96	35.7	22.9877	0	0	0	0	0	0	0	0	0	0	0	0	0	0	0	0	0	0	0	0	0	0	0	0	0
240024	2017-04-01	15:39:00	2	53	4	0	1	0	CHARCOAL	0	0	0	0	1	1	0		COUGH	126	88	73	97	36.9	22.3081	0	0	0	0	0	0	0	0	0	0	0	0	0	0	0	0	0	0	0	0	0	0	0	0	0
240091	2017-04-05	20:58:00	2	87	4	1	1	0		0	1	0	0	1	1	0		DYSPNEA/GENERALIZED WEAKNESS	175	81	102	91	37.6	21.4778	0	0	0	0	0	0	0	0	0	0	0	0	0	0	0	0	0	0	0	0	0	0	0	0	0
240160	2017-04-07	09:15:00	2	64	4	0	1	1	CHARCOAL	0	0	0	0	1	1	0		DIFFICULTY BREATHING	128	87	76	97	36.5	18.4666	0	0	0	0	0	0	0	0	0	0	0	0	0	0	0	0	0	0	0	0	0	0	0	0	0
240162	2017-04-07	12:15:00	2	28	4	1	1	0	CHARCOAL	0	0	0	0	1	1	0		FEVER	128	85	92	96	36.3	24.0747	0	0	0	0	0	0	0	0	0	0	0	0	0	0	0	0	0	0	0	0	0	0	0	0	0
240184	2017-04-09	21:38:00	2	48	4	1	1	1	CHARCOAL	1	0	0	0	1	1	0		DIFFICULTY BREATHING	154	91	97	99	36.4	24.0101	0	0	0	0	0	0	0	0	0	0	0	0	0	0	0	0	0	0	0	0	0	0	0	0	0
240192	2017-04-10		2	21	4	0	1	1	CHARCOAL	0	0	0	0	1	1	0		DIFFICULTY BREATHING/COUGH	145	86	79	96	35.8	18.2563	0	0	0	0	0	0	0	0	0	0	0	0	0	0	0	0	0	0	0	0	0	0	0	0	0
240205	2017-04-11	09:30:00	2	55	4	1	1	0	CHARCOAL	0	0	0	0	1	1	0		COUGH/DIFFICULTY BREATHING	125	85	119	99	36.7	18.9778	0	0	0	0	0	0	0	0	0	0	0	0	0	0	0	0	0	0	0	0	0	0	0	0	0
240237	2017-04-08	08:05:00	2	42	4	1	1	0	CHARCOAL	0	0	0	0	1	1	0		THROAT PAIN/FEVER	102	89	99	96	36	7.77778	0	0	0	0	0	0	0	0	0	0	0	0	0	0	0	0	0	0	0	0	0	0	0	0	0
240258	2017-04-11	07:10:00	2	27	4	0	1	0	CHARCOAL	0	0	0	0	1	1	0		CHEST PAIN	133	75	70	93	36.1	18.5378	0	0	0	0	0	0	0	0	0	0	0	0	0	0	0	0	0	0	0	0	0	0	0	0	0
240325	2017-04-13	15:40:00	2	59	4	0	1	0	CHARCOAL	0	0	0	0	1	1	0		FEVER	147	82	75	99	37	18.7017	0	0	0	0	0	0	0	0	0	0	0	0	0	0	0	0	0	0	0	0	0	0	0	0	0
240328	2017-04-13	12:50:00	2	28	4	1	1	0	CHARCOAL	0	0	0	0	1	1	0		FEVER	105	71	88	99	35.4	26.398	0	0	0	0	0	0	0	0	0	0	0	0	0	0	0	0	0	0	0	0	0	0	0	0	0
240338	2017-04-13	09:00:00	2	60	4	1	1	0	CHARCOAL	1	0	0	0	1	1	0		CHEST PAIN	159	78	93	88	36.9	25.8689	0	0	0	0	0	0	0	0	0	0	0	0	0	0	0	0	0	0	0	0	0	0	0	0	0
240454	2017-04-23	10:50:00	2	60	4	1	1	0	CHARCOAL	0	0	0	0	1	1	0		HEADACHE	131	89	69	98	36.3	34.2967	0	0	0	0	0	0	0	0	0	0	0	0	0	0	0	0	0	0	0	0	0	0	0	0	0
240511	2017-04-25		2	48	4	1	1	0	CHARCOAL	0	1	0	0	1	1	0		DIFFICULTY BREATHING	130	103	108	99	34.4	19.0901	0	0	0	0	0	0	0	0	0	0	0	0	0	0	0	0	0	0	0	0	0	0	0	0	0
260053	2017-04-04	12:13:00	2	41	4	1	1	0	CHARCOAL	0	0	0	0	1	1	0		COUGH/DIFFICULTY BREATHING	110	95	119	95	39.1	20.5592	0	0	0	0	0	0	0	0	0	0	0	0	0	0	0	0	0	0	0	0	0	0	0	0	0
260071	2017-04-04	18:22:00	2	39	4	1	1	0	CHARCOAL	1	0	1	0	1	1	0		COUGH/DIFFICULTY BREATHING	157	109	85	99	36	26.2222	0	0	0	0	0	0	0	0	0	0	0	0	0	0	0	0	0	0	0	0	0	0	0	0	0
260234	2017-04-09	16:17:00	2	46	4	0	1	0	CHARCOAL	0	0	0	0	0	1	0		DIFFICULTY BREATHING	171	102	99	98	36.2	19.47	0	0	0	0	0	0	0	0	0	0	0	0	0	0	0	0	0	0	0	0	0	0	0	0	0
260707	2017-04-26	12:28:00	2	30	4	0	1	0	CHARCOAL	1	0	0	0	0	1	0		COUGH/RHINORRHEA	143	127	89	97	36.9	29.1372	0	0	0	0	0	0	0	0	0	0	0	0	0	0	0	0	0	0	0	0	0	0	0	0	0
9182263	2017-10-09	06:05:00	2	41	4	1	1		CHARCOAL				0	1	1	0		FEVER/COUGH	139	98	73	98	36.6	26.8386	0	0	0	0	0	0	0	0	0	0	0	0	0	0	0	0	0	0	0	0	0	0	0	0	0
91821234	2017-10-28	20:37:00	2	27	4	0	1		CHARCOAL+FIREWOOD				0	1	1	0		ASTHMA	124	79	93		35.7	22.5074	0	0	0	0	0	0	0	0	0	0	0	0	0	0	0	0	0	0	0	0	0	0	0	0	0
91821306	2017-10-30	11:59:00	2	50	4	1	1	0	CHARCOAL+GAS	1	0	0	0	0	1	0		FLU	106	73	75	98	36.7	45.7658	0	0	0	0	0	0	0	0	0	0	0	0	0	0	0	0	0	0	0	0	0	0	0	0	0
918252	2017-10-03	09:25:00	2	33	4	1	1	0	CHARCOAL	0	0		0	1	1	0		HEADACHE	113	75	73	99	37	24.1588	0	0	0	0	0	0	0	0	0	0	0	0	0	0	0	0	0	0	0	0	0	0	0	0	0
240209	2017-04-11	08:37:00	2	29	4	0	1	0	CHARCOAL	0	0	0	0	1	1	0		CHEST PAIN	155	95	88	99	35.4	20.3244	0	0	0	0	0	0	0	0	0	0	0	0	0	0	0	0	0	0	0	0	0	0	0	0	0
260506	2017-04-18	10:55:00	2	21	4	0	1	0	CHARCOAL	0	1	0	0	1	1	0		SPINE PAIN	115	97	62	99	33.9	23.5351	0	0	0	0	0	0	0	0	0	0	0	0	0	0	0	0	0	0	0	0	0	0	0	0	0
260570	2017-04-24	19:00:00	2	47	4	1	1	0	FIREWOOD	0	0	0	0	1	1	0		RIB PAIN	136	88	97	98	36.3	28.1666	0	0	0	0	0	0	0	0	0	0	0	0	0	0	0	0	0	0	0	0	0	0	0	0	0
9182275	2017-10-09	08:54:00	2	53	4	0	1	0	CHARCOAL	1	0	0	0	0	1	0		PAIN IN LEGS	167	92	77	99	36.3	30.3461	0	0	0	0	0	0	0	0	0	0	0	0	0	0	0	0	0	0	0	0	0	0	0	0	0
9182379	2017-10-12	06:16:00	2	61	4	0	1	1	CHARCOAL	0	0	0	0	1	1	1		LUMBAR PAIN/DIFFICULTY DEFECATING	149	97	67	98	36.8	17.7096	0	0	0	0	0	0	0	0	0	0	0	1	0	0	0	0	0	0	0	0	0	0	0	0	0
240003	2017-04-01	08:20:00	2	35	4	1	1	1	CHARCOAL	0	0	0	0	1	1	0		EPIGASTRIC PAIN	123	87	88	98	36.9	25.2734	0	0	0	0	0	0	0	0	0	0	0	0	0	0	0	0	0	0	0	0	0	0	0	0	0
240275	2017-04-10	19:20:00	2	22	4	1	1	0	CHARCOAL	0	0	0	0	1	1	0		ABDOMINAL PAIN	130	81	84	97	37.1	21.2706	0	0	0	0	0	0	0	0	0	0	0	0	0	0	0	0	0	0	0	0	0	0	0	0	0
240304	2017-04-13	13:00:00	2	23	4	0	1	0	CHARCOAL	0	0	0	0	1	1	0		DIFFICULTY SEEING IN DISTANCE	117	80	80	99	35.7	18.3644	0	0	0	0	0	0	0	0	0	0	0	0	0	0	0	0	0	0	0	0	0	0	0	0	0
240004	2017-04-01	09:05:00	2	20	4	0	1	1	CHARCOAL+FIREWOOD	0	0	0	0	1	1	0		EARACHE	133	72	90	96	35.9	20.5469	0	0	0	0	0	0	0	0	0	0	0	0	0	0	0	0	0	0	0	0	0	0	0	0	0
240018	2017-04-01	12:59:00	2	26	4	1	1	0	CHARCOAL	0	0	0	0	1	1	0		ABDOMINAL PAIN	127	78	109	94	35.9	45.6114	0	0	0	0	0	0	0	0	0	0	0	0	0	0	0	0	0	0	0	0	0	0	0	0	0
260504	2017-04-18	09:21:00	2	30	4	0	1	0	FIREWOOD	0	0	0	0	1	1	0		PAIN IN LEFT GROIN REGION	144	92	71	98	35.5	22.8659	0	0	0	0	0	0	0	0	0	0	0	0	0	0	0	0	0	0	0	0	0	0	0	0	0
260701	2017-04-26	10:51:00	2	54	4	0	1	0	CHARCOAL	0	0	0	0	0	1	0		INCREASED VOLUME OF INGUINAL REGION	113	68	69	99	36.2	22.0604	0	0	0	0	0	0	0	0	0	0	0	0	0	0	0	0	0	0	0	0	0	0	0	0	0
240005	2017-04-01	09:14:00	2	47	4	1	1	0	CHARCOAL	1	0	0	0	1	0	0		HEADACHE	142	94	70	95	36.9	26.8054	0	0	0	0	0	0	0	0	0	0	0	0	0	0	0	0	0	0	0	0	0	0	0	0	0
240027	2017-04-01	19:58:00	2	22	4	1	1	1	CHARCOAL	1	0	0	0	1	0	0		HEADACHE/PALPITATION	143	95	79	99	36.6	20.7499	0	0	0	0	0	0	0	0	0	0	0	0	0	0	0	0	0	0	0	0	0	0	0	0	0
240061	2017-04-03	09:45:00	2	50	4	0	1	0	CHARCOAL	1	0	0	0	1	0	0		HEADACHE	137	94	112	94	36.5	28.2284	0	0	0	0	0	0	0	0	0	0	0	0	0	0	0	0	0	0	0	0	0	0	0	0	0
240068	2017-04-03	15:30:00	2	42	4	0	1	0	CHARCOAL	0	0	0	0	1	0	0		HEADACHE	149	88	81	99	37.3	23.3011	0	0	0	0	0	0	0	0	0	0	0	0	0	0	0	0	0	0	0	0	0	0	0	0	0
240103	2017-04-05	13:30:00	2	47	4	0	1	0	CHARCOAL	1	0	0	0	1	0	0		HEADACHE	183	119	81	98	36.2	21.6955	0	0	0	0	0	0	0	0	0	0	0	0	0	0	0	0	0	0	0	0	0	0	0	0	0
240106	2017-04-05	16:45:00	2	22	4	1	1	0	CHARCOAL	0	0	0	0	1	0	0		SLIGHT TIREDNESS	83	58	114	99	36.6	18.564	0	0	0	0	0	0	0	0	0	0	0	0	0	0	0	0	0	0	0	0	0	0	0	0	0
240107	2017-04-05	16:56:00	2	56	4	1	1	0	CHARCOAL	1	0	0	0	1	0	0		HEADACHE/DIZZINESS	148	95	61	98	36.7	18.1061	0	0	0	0	0	0	0	0	0	0	0	0	0	0	0	0	0	0	0	0	0	0	0	0	0
240110	2017-04-05	10:20:00	2	50	4	0	1	0	CHARCOAL	1	0	0	0	1	0	0		HEADACHE/FOOT PAIN	143	101	84	99	34.2	20.3475	0	0	0	0	0	0	0	0	0	0	0	0	0	0	0	0	0	0	0	0	0	0	0	0	0
240186	2017-04-09	23:20:00	2	57	4	1	1	1	CHARCOAL	1	0	0	0	1	0	0		HEADACHE/PALPITATIONS	163	104	83	75	35.9	24.8235	0	0	0	0	0	0	0	0	0	0	0	0	0	0	0	0	0	0	0	0	0	0	0	0	0
240219	2017-04-11	13:55:00	2	46	4	1	1	0	CHARCOAL	1	0	0	0	1	0	0		PALPITATIONS/VOMITING	178	91	96	99	35.8	27.1044	0	0	0	0	0	0	0	0	0	0	0	0	0	0	0	0	0	0	0	0	0	0	0	0	0
240231	2017-04-11	15:58:00	2	40	4	1	1	0	CHARCOAL	1	0	0	0	1	0	0		MUSCLE PAIN	132	77	85	98	36.7	27.5838	0	0	0	0	0	0	0	0	0	0	0	0	0	0	0	0	0	0	0	0	0	0	0	0	0
240243	2017-04-11		2	67	4	0	1	0	CHARCOAL	1	0	0	0	1	0	0		DIFFICULTY BREATHING	121	100	85		35		0	0	0	0	0	0	0	0	0	0	0	0	0	0	0	0	0	0	0	0	0	0	0	0	0
240264	2017-04-10	12:34:00	2	55	4	1	1	0	CHARCOAL	1	0	0	0	1	0	0		HEADACHE	165	104	91	94	37.1	20.0398	0	0	0	0	0	0	0	0	0	0	0	0	0	0	0	0	0	0	0	0	0	0	0	0	0
240272	2017-04-10	10:33:00	2	43	4	0	1	0	CHARCOAL	1	0	0	0	0	0	0			147	104	68	95	36.3	22.2756	0	0	0	0	0	0	0	0	0	0	0	0	0	0	0	0	0	0	0	0	0	0	0	0	0
240337	2017-04-13	11:20:00	2	30	4	1	1	0	CHARCOAL	1	0	0	0	1	0	0		HEADACHE	141	126	91	92	35.7	23.2138	0	0	0	0	0	0	0	0	0	0	0	0	0	0	0	0	0	0	0	0	0	0	0	0	0
240351	2017-04-15	23:50:00	2	37	4	1	1	0	CHARCOAL	1	0	0	0	1	0	0		HEADACHE/DIZZINESS	199	130	84	86	35.2	21.5651	0	0	0	0	0	0	0	0	0	0	0	0	0	0	0	0	0	0	0	0	0	0	0	0	0
240369	2017-04-17	08:45:00	2	35	4	1	1	0	CHARCOAL	1	0	0	0	0	0	0		RIGHT SHOULDER PAIN	159	95	81	94	36.6	21.3204	0	0	0	0	0	0	0	0	1	0	0	0	0	0	0	0	0	0	0	0	0	0	0	0	0
240390	2017-04-17	17:33:00	2	66	4	1	1	0	CHARCOAL	0	0	1	0	0	0	0		DIFFICULTY BREATHING	141	103	87	99	36	21.2084	0	0	0	0	0	0	0	0	0	0	0	0	0	0	0	0	0	0	0	0	0	0	0	0	0
240430	2017-04-21		2	39	4	1	1	0	CHARCOAL	1	0	0	0	1	0	0		HEADACHE/ALTERED BEHAVIOUR	210	163	136	99	35.6	16.2319	0	0	0	0	0	0	0	0	0	0	0	0	0	0	0	0	0	0	0	0	0	0	0	0	0
240508	2017-04-25		2	34	4	0	1	0	FIREWOOD	0	0	0	0	1	0	0		PAIN AND SWELLING OF LOWER JAW	138	90	93	99	38.4	23.0222	0	0	0	0	0	0	0	0	0	0	0	0	0	0	0	0	0	0	0	0	0	0	0	0	0
240514	2017-04-25	14:10:00	2	56	4	0	1	0	CHARCOAL	1	0	0	0	1	0	1		DIFFICULTY BREATHING/BODY SWELLING	167	112	54	98	35.9	29.621	0	0	0	0	0	0	0	0	0	0	0	0	0	0	0	0	0	0	0	0	0	0	0	0	0
240515	2017-04-25	14:08:00	2	42	4	0	1	0	CHARCOAL	1	0	0	0	1	0	1		DIZZINESS	203	122	87	99	37	48.1859	0	0	0	0	0	0	0	0	0	0	0	0	0	0	0	0	0	0	0	0	0	0	0	0	0
240522	2017-04-27	11:25:00	2	53	4	0	1	0	CHARCOAL	1	0	0	1	1	0	0		HEADACHE	141	85	92	80	35.8	20.2664	0	0	0	0	0	0	0	0	0	0	0	0	0	0	0	0	0	0	0	0	0	0	0	0	0
240535	2017-04-29	22:30:00	2	51	4	0	1	0	CHARCOAL	1	0	0	0	1	0	0		HEADACHE	153	90	76	99	36.4	24.7768	0	0	0	0	0	0	0	0	0	0	0	0	0	0	0	0	0	0	0	0	0	0	0	0	0
260017	2017-04-02		2	43	4	1	1	0	CHARCOAL	1	0	0	0	1	0	0		INTENSE HEADACHE	195	117	90	98	36.7	30.2973	0	0	0	0	0	0	0	0	0	0	0	0	0	0	0	0	0	0	0	0	0	0	0	0	0
260051	2017-04-04	09:31:00	2	32	4	0	1	0	CHARCOAL	0	0	0	0	1	0	0		HEADACHE	136	92	75	99	36.5	21.7534	0	0	0	0	0	0	0	0	0	0	0	0	0	0	0	0	0	0	0	0	0	0	0	0	0
260055	2017-04-04	09:36:00	2	69	4	1	1	0	CHARCOAL	1	0	0	0	1	0	0		CHEST WALL PAIN	153	101	88	90	36.6	17.5981	0	0	0	0	0	0	0	0	0	0	0	0	0	0	0	0	0	0	0	0	0	0	0	0	0
260086	2017-04-04		2	39	4	0	1	0	CHARCOAL	1	1	0	0	1	0	0		APHASIA AND REDUCTION OF MUSCULAR STRENGTH TO RIGHT	203	125	70	99	37.3	21.9735	0	0	0	0	0	0	0	0	0	0	0	0	0	0	0	0	0	0	0	0	0	0	0	0	0
260088	2017-04-04	20:53:00	2	33	4	1	1	0	CHARCOAL	1	0	0	0	1	0	0		HEADACHE	149	108	104	98	36.9	23.1842	0	0	0	0	0	0	0	0	0	0	0	0	0	0	0	0	0	0	0	0	0	0	0	0	0
260138	2017-04-06	18:24:00	2	57	4	0	1	0	CHARCOAL	1	0	0	0	1	0	0		HEADACHE	207	123	94	99	37	14.3634	0	0	0	0	0	0	0	0	0	0	0	0	0	0	0	0	0	0	0	0	0	0	0	0	0
260161	2017-04-08		2	50	4	1	1	0	CHARCOAL	0	0	0	0	0	0	0		INCREASED ABDOMINAL VOLUME	157	106	78	99	37.8	22.5391	0	0	0	0	0	0	0	0	0	0	0	0	0	0	0	0	0	0	0	0	0	0	0	0	0
260221	2017-04-06	12:00:00	2	27	4	1	1	0	CHARCOAL	1	0	0	0	1	0	0		CHEST PAIN	121	107	120	95	38.7	33.0905	0	0	0	0	0	0	0	0	0	0	0	0	0	0	0	0	0	0	0	0	0	0	0	0	0
260266	2017-04-12	17:00:00	2	32	4	0	1	0	CHARCOAL	1	1	0	0	1	0	0		BODY ACHE	199	126	74	93	36.6	24.9454	0	0	0	0	0	0	0	0	0	0	0	0	0	0	0	0	0	0	0	0	0	0	0	0	0
260308	2017-04-10	10:52:00	2	32	4	1	1	0	CHARCOAL	1	0	0	0	0	0	0		HEADACHE	120	96	98	95	36.3	42.9752	0	0	0	0	0	0	0	0	0	0	0	0	0	0	0	0	0	0	0	0	0	0	0	0	0
260327	2017-04-11		2	54	4	0	1	0	CHARCOAL	1	0	0	0	1	0	0		HEADACHE/PARALYSIS	230	120	120	99	36.4	26.0631	0	0	0	0	0	0	0	0	0	0	0	0	0	0	0	0	0	0	0	0	0	0	0	0	0
260345	2017-04-15	15:00:00	2	51	4	1	1	0	CHARCOAL	0	0	0	0	1	0	0		DIFFICULTY BREATHING	190	123	110	97	35.8	27.5452	0	0	0	0	0	0	0	0	0	0	0	0	0	0	0	0	0	0	0	0	0	0	0	0	0
260422	2017-04-19	09:40:00	2	51	4	1	1	0	CHARCOAL	1	0	0	0	1	0	0		HEADACHE	158	95	127	99	37.4	26.5021	0	0	0	0	0	0	0	0	0	0	0	0	0	0	0	0	0	0	0	0	0	0	0	0	0
260518	2017-04-18	17:03:00	2	64	4	0	1	0	CHARCOAL	1	0	0	0	1	0	0		SOMETHING ABOUT THE LEFT SIDE MUSCLES ??	136	99	61	95	36.4		0	0	0	0	0	0	0	0	0	0	0	0	0	0	0	0	0	0	0	0	0	0	0	0	0
260543	2017-04-24	10:26:00	2	42	4	1	1	0	CHARCOAL+FIREWOOD	1	0	0	0	1	0	0		HEAD PAIN	187	107	81	82	36.6	27.4514	0	0	0	0	0	0	0	0	0	0	0	0	0	0	0	0	0	0	0	0	0	0	0	0	0
260605	2017-04-27	09:30:00	2	45	4	1	1	0	CHARCOAL	1	0	0	0	1	0	0		SORE THROAT	192	125	100	96	36.4	36.8481	0	0	0	0	0	0	0	0	0	0	0	0	0	0	0	0	0	0	0	0	0	0	0	0	0
260606	2017-04-27	10:15:00	2	47	4	1	1	0	CHARCOAL	1	0	0	0	1	0	0		HEADACHE	130	99	100	96	35.9	24.1088	0	0	0	0	0	0	0	0	0	0	0	0	0	0	0	0	0	0	0	0	0	0	0	0	0
260632	2017-04-27	15:35:00	2	46	4	1	1	0	CHARCOAL	1	0	0	0	1	0	0		PALPITATIONS	202	104	100	90	36.7	24.9324	0	0	0	0	0	0	0	0	0	0	0	0	0	0	0	0	0	0	0	0	0	0	0	0	0
260638	2017-04-27	14:00:00	2	62	4	1	1	0	CHARCOAL	1	0	0	0	0	0	0		HEADACHE	200	119	98	96	37.3	26.2292	0	0	0	0	0	0	0	0	0	0	0	0	0	0	0	0	0	0	0	0	0	0	0	0	0
260668	2017-04-22	15:00:00	2	21	4	1	1	0	CHARCOAL	0	0	0	0	0	0	0		WEAKNESS	141	68	88	99	35.7	16.6391	0	0	0	0	0	0	0	0	0	0	0	0	0	0	0	0	0	0	0	0	0	0	0	0	0
260675	2017-04-22	19:00:00	2	35	4	1	1	0	CHARCOAL	0	0	0	0	0	0	0		FEVER/HEADACHE	152	111	85	99	36.7	22.4941	0	0	0	0	0	0	0	0	0	0	0	0	0	0	0	0	0	0	0	0	0	0	0	0	0
260687	2017-04-26		2	33	4	1	1	0	CHARCOAL	1	0	0	0	0	0	0		DIFFICULTY RUNNING	198	142	61	98	36.8		0	0	0	0	0	0	0	0	0	0	0	0	0	0	0	0	0	0	0	0	0	0	0	0	0
260698	2017-04-26	10:15:00	2	74	4	0	1	0	CHARCOAL	1	0	0	0	0	0	0		LUMBAR SPINE PAIN	164	104	62	99	36.3	15.5469	0	0	0	0	0	0	0	0	0	0	0	0	0	0	0	0	0	0	0	0	0	0	0	0	0
91826	2017-10-01	12:03:00	2	67	4	1	1	0	CHARCOAL	1	0	0	0	0	0	0		FALL	196	108	100		37.3	25.2889	0	0	0	0	0	0	0	0	0	0	0	0	0	0	0	0	0	0	0	0	0	0	0	0	0
9182139	2017-10-05	18:03:00	2	34	4	1	1	0	GAS	1	1	0	0	1	0	0		HEADACHE/FEVER	157	100	106	98	37.7	34.9778	0	0	0	0	0	0	0	0	0	0	0	0	0	0	0	0	0	0	0	0	0	0	0	0	0
9182140	2017-10-05	07:55:00	2	63	4	1	1	0	CHARCOAL	1	0	0	0	1	0	0		DIZZINESS/PALPITATIONS	208	114	68	99	35.8	21.3156	0	0	0	0	0	0	0	0	0	0	0	0	0	0	0	0	0	0	0	0	0	0	0	0	0
9182249	2017-10-08	16:00:00	2	33	4	1	1	1	CHARCOAL	1	0	1	0	0	0	0		EPISTAXIS	158	103	97	92	37.4	26.7759	0	0	0	0	0	0	0	0	0	0	0	0	0	0	0	0	0	0	0	0	0	0	0	0	0
9182349	2017-10-11	09:15:00	2	77	4	0	1	0	CHARCOAL	1	0	0	0	1	0	0		HEADACHE	148	87	93	98	37	17.6898	0	0	0	0	0	0	0	0	0	0	0	0	0	0	0	0	0	0	0	0	0	0	0	0	0
9182353	2017-10-11	09:56:00	2	65	4	1	1	0	CHARCOAL	1	0	0	0	1	0	0		PALPITATIONS/PSYCHOSIS	132	90	72	98	35.9	35.1848	0	0	0	0	0	0	0	0	0	0	0	0	0	0	0	0	0	0	0	0	0	0	0	0	0
9182402	2017-10-12	18:01:00	2	29	4	0	1		CHARCOAL				0	1	0	0		CHEST PAIN	132	87	64	99	35.8	20.286	0	0	0	0	0	0	0	0	0	0	0	0	0	0	0	0	0	0	0	0	0	0	0	0	0
9182452	2017-10-14	06:29:00	2	27	4	0	1		CHARCOAL				0	1	0	0		CHEST PAIN	162	97	75	97	36.4	26.0078	0	0	0	0	0	0	0	0	0	0	0	0	0	0	0	0	0	0	0	0	0	0	0	0	0
9182574	2017-10-16	17:30:00	2	64	4	0	1	0	CHARCOAL	1	0	0	0	0	0	0		SUDDEN FALL	141	78	75	99	36.5	33.5547	1	0	0	0	0	0	0	0	0	0	0	0	0	0	0	0	0	0	0	0	0	0	0	0	0
9182636	2017-10-17	16:36:00	2	37	4	0	1	0	CHARCOAL	1	0	0	0	0	0	0		PALPITATIONS	166	104	72	99	35.2	35.4979	0	0	0	0	0	0	0	0	0	0	0	0	0	0	0	0	0	0	0	0	0	0	0	0	0
9182705	2017-10-18	18:50:00	2	40	4	1	1	0	CHARCOAL	1	0	0	0	0	0	0		PALPITATION	139	113	102	99	36	18.9422	0	0	0	0	0	0	0	0	0	0	0	0	0	0	0	0	0	0	0	0	0	0	0	0	0
9182767	2017-10-20	06:10:00	2	65	4	1	1	0	CHARCOAL+FIREWOOD	1	0	0	0	1	0	0		OCCIPITAL HEADACHE	191	124	99	98	35	18.8876	0	0	0	0	0	0	0	0	0	0	0	0	0	0	0	0	0	0	0	0	0	0	0	0	0
9182769	2017-10-20	08:12:00	2	75	4	1	1	0	CHARCOAL	1	0	0	0	1	0	0		HEADACHE	206	96	100	96	36.2	21.3333	0	0	0	0	0	0	0	0	0	0	0	0	0	0	0	0	0	0	0	0	0	0	0	0	0
9182800	2017-10-20	18:26:00	2	76	4	0	1	0	CHARCOAL	1	0	0	0	1	0	0		DIZZINESS	148	103	82	98	36	34.6875	0	0	0	0	0	0	0	0	0	0	0	0	0	0	0	0	0	0	0	0	0	0	0	0	0
9182928	2017-10-22	21:40:00	2	34	4	1	1	1	CHARCOAL	1	1	0	0	1	0	0		INTENSE HEADACHE	138	92	67	99	35.2	25.301	0	0	0	0	0	0	0	0	0	0	0	0	0	0	0	0	0	0	0	0	0	0	0	0	0
9182988	2017-10-23	21:03:00	2	61	4	0	1	0	CHARCOAL	1	0	0	0	1	0	0		HYPERTENSION	76	55	98	98	36.3	35.8408	0	0	0	0	0	0	0	0	0	0	0	0	0	0	0	0	0	0	0	0	0	0	0	0	0
91821051	2017-10-26	06:12:00	2	70	4	0	1	0	CHARCOAL	1	0	0	0	1	0	0		HYPERTENSION	219	118	65	99	36.2	26.4697	0	0	0	0	0	0	0	0	0	0	0	0	0	0	0	0	0	0	0	0	0	0	0	0	0
91821160	2017-10-27	09:41:00	2	60	4	0	1		CHARCOAL				0	0	0	0		HEADACHE	153	108	69	99	36.6	21.2299	0	0	0	0	0	0	0	0	0	0	0	0	0	0	0	0	0	0	0	0	0	0	0	0	0
91821307	2017-10-30	12:29:00	2	20	4	1	1	0	CHARCOAL	1	0	0	0	0	0	1		WHOLE BODY SWELLING/WEAKNESS/PALPITATIONS	95	74	85	99	35.6	20.7653	0	0	0	0	0	0	0	0	0	0	0	0	0	0	0	0	0	0	0	0	0	0	0	0	0
260216	2017-04-09	10:58:00	2	27	4	1	1	0	CHARCOAL	0	0	0	0	1	1	0		FAINT	107	68	94	87	36.3	19.5371	0	0	0	0	0	0	0	0	0	0	0	0	0	0	0	0	0	0	0	0	0	0	0	0	0
240010	2017-04-01	09:26:00	2	24	4	0	1	0	CHARCOAL	0	1	0	0	1	1	0		FEVER/HEADACHE	146	99	78	96	37.8	20.366	0	0	0	0	0	0	0	0	0	0	0	0	0	0	0	0	0	0	0	0	0	0	0	0	0
240015	2017-04-01	11:40:00	2	30	4	1	1	0	CHARCOAL+FIREWOOD	0	0	0	0	1	1	0		FEVER	146	77	120	99	38.2	23.7542	0	0	0	0	0	0	0	0	0	0	0	0	0	0	0	0	0	0	0	0	0	0	0	0	0
240060	2017-04-03	08:45:00	2	38	4	1	1	1	CHARCOAL	0	0	0	0	1	1	0		OUTFLOW OF WHITE SECRETION WITH UNSAVORY SMELL FROM VAGINA	117	88	91	96	37.1	18.1862	0	0	0	0	0	0	0	0	0	0	0	0	0	0	0	0	0	0	0	0	0	0	0	0	0
240152	2017-04-07		2	38	4	1	1	0	CHARCOAL	0	0	1	1	1	1	0		DIFFICULTY BREATHING	88	67	125	98	38	19.2329	0	0	0	0	0	0	0	0	0	0	0	0	0	0	0	0	0	0	0	0	0	0	0	0	0
240203	2017-04-11		2	70	4	1	1	0	CHARCOAL	0	0	0	0	1	1	0		GENERALIZED WEAKNESS	109	56	97	99	35.6	17.8148	0	0	0	0	0	0	0	0	0	0	0	0	0	0	0	0	0	0	0	0	0	0	0	0	0
240298	2017-04-13	17:20:00	2	24	4	0	1	0	CHARCOAL	0	0	0	0	1	1	0		FEVER	137	95	89	99	37.1	18.8581	0	0	0	0	0	0	0	0	0	0	0	0	0	0	0	0	0	0	0	0	0	0	0	0	0
240299	2017-04-13	17:35:00	2	30	4	0	1	0	CHARCOAL	0	0	1	0	1	1	0		PAIN ON SWALLOWING	115	85	85	98	38.9	15.6901	0	0	0	0	0	0	0	0	0	0	0	0	0	0	0	0	0	0	0	0	0	0	0	0	0
240302	2017-04-13	13:10:00	2	36	4	1	1	0	CHARCOAL	0	0	0	0	1	1	0		FEVER	120	72	62	95	38	24.4778	0	0	0	0	0	0	0	0	0	0	0	0	0	0	0	0	0	0	0	0	0	0	0	0	0
240303	2017-04-13	13:23:00	2	45	4	0	1	0	FIREWOOD	0	0	1	0	1	1	0		RIGHT LEG PAIN	106	61	96	99	36.5	20.1348	0	1	1	1	1	0	0	0	0	0	0	0	0	0	0	0	0	0	0	0	0	0	0	0	0
240329	2017-04-13	11:25:00	2	36	4	1	1	0	CHARCOAL+FIREWOOD	0	0	1	0	1	1	0		FEVER	97	68	96	98	38.5	21.3675	0	0	0	0	0	0	0	0	0	0	0	0	0	0	0	0	0	0	0	0	0	0	0	0	0
240335	2017-04-13	11:00:00	2	21	4	1	1	0	CHARCOAL	0	0	0	0	1	1	0		VAGINAL DISCHARGE	126	86	91	78	35.8	24.9962	0	0	0	0	0	0	0	0	0	0	0	0	0	0	0	0	0	0	0	0	0	0	0	0	0
240429	2017-04-21		2	28	4	0	1	0	CHARCOAL	0	0	1	1	0	1	0		PRODUCTIVE COUGH	87	66	119	99	35.9	14.8047	0	0	0	0	0	0	0	0	0	0	0	0	0	0	0	0	0	0	0	0	0	0	0	0	0
260070	2017-04-04	18:46:00	2	41	4	0	1	0	FIREWOOD	0	1	0	1	1	1	0		VOMITING/GENERAL WEAKNESS	120	50	63	99	36	14.3321	0	0	0	0	0	0	0	0	0	0	0	0	0	0	0	0	0	0	0	0	0	0	0	0	0
260261	2017-04-12	14:00:00	2	56	4	0	1	0	GAS	0	0	0	0	1	1	0		BODY ACHE	145	66	88	99	36.8	31.4269	0	0	0	0	0	0	0	0	0	0	0	0	0	0	0	0	0	0	0	0	0	0	0	0	0
260362	2017-04-16		2	23	4	1	1	0	CHARCOAL	0	0	1	0	0	1	0		DIFFICULTY BREATHING	122	91	118	97	37.3	19.8471	0	0	0	0	0	0	0	0	0	0	0	0	0	0	0	0	0	0	0	0	0	0	0	0	0
260397	2017-04-14	14:00:00	2	28	4	1	1	0	CHARCOAL	0	0	1	0	1	1	0		ABDOMINAL PAIN	116	69	88	85	36.4		0	0	0	0	0	0	0	0	0	0	0	0	0	0	0	0	0	0	0	0	0	0	0	0	0
260439	2017-04-14	15:00:00	2	32	4	0	1	1	CHARCOAL	0	0	0	0	1	1	0		FEVER	116	77	68	98	35.4	23.4924	0	0	0	0	0	0	0	0	0	0	0	0	0	0	0	0	0	0	0	0	0	0	0	0	0
260443	2017-04-14	06:45:00	2	25	4	1	1	0	CHARCOAL	0	0	0	0	1	1	0		VAGINAL DISCHARGE	117	101	103	98	35.2	17.0533	0	0	0	0	0	0	0	0	0	0	0	0	0	0	0	0	0	0	0	0	0	0	0	0	0
260505	2017-04-18	10:21:00	2	20	4	1	1	0	CHARCOAL	0	1	0	0	1	1	0		ACUTE DIARRHOEA/FEVER	112	64	78	95	37.1	30.7004	0	0	0	0	0	0	0	0	0	0	0	0	0	0	0	0	0	0	0	0	0	0	0	0	0
260601	2017-04-27	10:00:00	2	28	4	0	1	0	CHARCOAL	0	0	0	0	1	1	0		FEVER	132	79	99	71	36.4	19.2035	0	0	0	0	0	0	0	0	0	0	0	0	0	0	0	0	0	0	0	0	0	0	0	0	0
260603	2017-04-27	07:45:00	2	66	4	1	1	0	CHARCOAL	1	0	0	0	1	1	0		DIARRHOEA/FEVER	133	91	96	98	36.7	18.8199	0	0	0	0	0	0	0	0	0	0	0	0	0	0	0	0	0	0	0	0	0	0	0	0	0
260629	2017-04-27	15:20:00	2	30	4	1	1	0	CHARCOAL	0	0	0	0	1	1	0		DIARRHOEA	98	67	112	99	35.2	26.2966	0	0	0	0	0	0	0	0	0	0	0	0	0	0	0	0	0	0	0	0	0	0	0	0	0
918256	2017-10-03	11:32:00	2	37	4	1	1	0	CHARCOAL	0	0	1	1	1	1	0		COUGH/WEIGHT LOSS/CERVICAL WOUND	95	78	144	96	37.5	22.0386	0	0	0	0	0	0	0	0	0	0	0	0	0	0	0	0	0	0	0	0	0	0	0	0	0
240001	2017-04-01	07:50:00	2	33	4	0	1	0	CHARCOAL	0	0	0	0	1	0	0		HEADACHE	132	75	77	99	36.4	20.8684	0	0	0	0	0	0	0	0	0	0	0	0	0	0	0	0	0	0	0	0	0	0	0	0	0
240013	2017-04-01	10:40:00	2	39	4	0	1	0	CHARCOAL	0	1	0	0	1	0	0		HEADACHE	116	66	82	94	35.9	22.0703	0	0	0	0	0	0	0	0	0	0	0	0	0	0	0	0	0	0	0	0	0	0	0	0	0
240033	2017-04-02	01:22:00	2	36	4	0	1	1	CHARCOAL	1	0	0	0	1	0	0		PHYSICAL AGGRESSION	143	78	106	96	36.7	34.2857	0	0	0	0	0	0	0	0	0	0	0	0	0	0	0	0	0	0	0	0	0	0	0	0	0
240079	2017-04-03	18:30:00	2	29	4	0	1	0	CHARCOAL+GAS	0	0	0	0	1	0	0		URINE WITH BLOOD	135	78	72	99	37.2	21.2309	0	0	0	0	0	0	0	0	0	0	0	0	0	0	0	0	0	0	0	0	0	0	0	0	0
240087	2017-04-04	03:00:00	2	38	4	1	1	0	CHARCOAL	0	0	0	0	1	0	0		KNEE PAIN	111	72	138	95	37.7	39.6901	0	0	0	0	0	0	0	0	0	0	0	0	0	0	0	0	0	0	0	0	0	0	0	0	0
240099	2017-04-05	11:15:00	2	27	4	0	1	0	CHARCOAL	0	1	0	0	1	0	0		CHEST PAIN	130	76	73	98	37.4	26.6272	0	0	0	0	0	0	0	0	0	0	0	0	0	0	0	0	0	0	0	0	1	1	0	0	0
240114	2017-04-05	19:28:00	2	20	4	1	1	0	CHARCOAL+ELECTRIC OVEN	0	0	0	0	1	0	0		FEVER	143	101	120	97	40.1	35.5248	0	0	0	0	0	0	0	0	0	0	0	0	0	0	0	0	0	0	0	0	0	0	0	0	0
240130	2017-04-06	18:54:00	2	30	4	0	1	0	CHARCOAL	0	0	0	0	1	0	0		HEADACHE	132	73	93	85	36.6	24.022	0	0	0	0	0	0	0	0	0	0	0	0	0	0	0	0	0	0	0	0	0	0	0	0	0
240214	2017-04-11	12:48:00	2	25	4	1	1	0	CHARCOAL	0	0	0	0	1	0	0		ABDOMINAL PAIN	116	68	98	94	36.3	18.1312	0	0	0	0	0	0	0	0	0	0	0	0	0	0	0	0	0	0	0	0	0	0	0	0	0
240484	2017-04-21	10:30:00	2	34	4	0	1	0	CHARCOAL	0	0	0	0	1	0	0		EPIGASTRIC PAIN	152	60	90	98	36.5	34.2561	0	0	0	0	0	0	0	0	0	0	0	0	0	0	0	0	0	0	0	0	0	0	0	0	0
240507	2017-04-25	18:39:00	2	23	4	1	1	0	CHARCOAL	0	1	0	0	1	0	0		STOMACH PAIN	85	61	136	99	35.2	15.4915	0	0	0	0	0	0	0	0	0	0	0	0	0	0	0	0	0	0	0	0	0	0	0	0	0
240526	2017-04-27		2	34	4	1	1	0	CHARCOAL	0	0	1	1	1	0	0		FEVER/GENERALIZED WEAKNESS	61	38	139	97	38.4	18.4889	0	0	0	0	0	0	0	0	0	0	0	0	0	0	0	0	0	0	0	0	0	0	0	0	0
240529	2017-04-28	18:00:00	2	30	4	1	1	0	CHARCOAL+GAS	0	0	0	0	1	0	0		BODY ACHE	133	89	111	99	37.1	27.5763	0	0	0	0	0	0	0	0	0	0	0	0	0	0	0	0	0	0	0	0	0	0	0	0	0
240530	2017-04-28	16:00:00	2	22	4	1	1	0	CHARCOAL	0	0	0	0	1	0	0		EPIGASTRIC PAIN	136	90	90	99	35.8	23.8728	0	0	0	0	0	0	0	0	0	0	0	0	0	0	0	0	0	0	0	0	0	0	0	0	0
240531	2017-04-28	16:20:00	2	35	4	1	4	0	CHARCOAL	1	0	0	0	1	0	0		DIZZINESS	144	96	96	99	36.9	38.0949	0	0	0	0	0	0	0	0	0	0	0	0	0	0	0	0	0	0	0	0	0	0	0	0	0
260003	2017-04-02	09:51:00	2	34	4	1	1	0	CHARCOAL	0	0	0	0	1	0	0		FLANK PAIN	101	76	83	98	36.6	17.9777	0	0	0	0	0	0	0	0	0	0	0	0	0	0	0	0	0	0	0	0	0	0	0	0	0
260014	2017-04-02		2	21	4	1	1	0	CHARCOAL	0	0	0	0	1	0	0		HEADACHE/FEVER	101	68	126	90	37.6	20.7311	0	0	0	0	0	0	0	0	0	0	0	0	0	0	0	0	0	0	0	0	0	0	0	0	0
260085	2017-04-04		2	51	4	0	1	0	FIREWOOD	0	1	0	0	1	0	0		ABDOMINAL PAIN	137	105	83	99	37.3	16.786	0	0	0	0	0	0	0	0	0	0	0	0	0	0	0	0	0	0	0	0	0	0	0	0	0
260089	2017-04-04		2	36	4	1	1	0	CHARCOAL	0	0	0	0	1	0	0		ABDOMINAL PAIN	122	77	79	98	36.9	22.7694	0	0	0	0	0	0	0	0	0	0	0	0	0	0	0	0	0	0	0	0	0	0	0	0	0
260218	2017-04-09	10:38:00	2	28	4	0	1	0	CHARCOAL	0	0	0	0	1	0	0		HEADACHE	129	64	61	98	36.2	22.5778	0	0	0	0	0	0	0	0	0	0	0	0	0	0	0	0	0	0	0	0	0	0	0	0	0
260230	2017-04-09	09:23:00	2	20	4	0	1	0	CHARCOAL	0	0	0	0	0	0	0		NO COMPLAINT SUFFERED FROM PHYSICAL AGGRESSION	124	75	58	99	36.2	17.2613	0	0	0	0	0	0	0	0	0	0	0	0	0	0	0	0	0	0	0	0	0	0	0	0	0
260232	2017-04-09	08:48:00	2	27	4	1	1	0	CHARCOAL	0	0	0	0	1	0	0		ABDOMINAL PAIN/HEADACHE	112	77	124	99	37.2	24.0999	0	0	0	0	0	0	0	0	0	0	0	0	0	0	0	0	0	0	0	0	0	0	0	0	0
260254	2017-04-12	09:45:00	2	31	4	1	1	0	CHARCOAL	0	0	0	0	1	0	0		HYPOGASTRIC PAIN	116	72	86	99	37.1	31.6815	0	0	0	0	0	0	0	0	0	0	0	0	0	0	0	0	0	0	0	0	0	0	0	0	0
260260	2017-04-12		2	66	4	0	1	0	CHARCOAL	1	0	0	0	1	0	0		DIFFICULTY URINATING	161	81	81	99	37.1	27.2537	0	0	0	0	0	0	0	0	0	0	0	0	0	0	0	0	0	0	0	0	0	0	0	0	0
260267	2017-04-12	15:30:00	2	26	4	1	1	0	CHARCOAL	0	0	0	0	1	0	0			107	78	105	99	36.5	21.8292	0	0	0	0	0	1	0	0	0	0	0	0	0	0	0	0	0	0	0	0	0	0	0	0	0
260293	2017-04-14	00:55:00	2	20	4	1	1	0	CHARCOAL	1	0	0	0	1	0	0		ABDOMINAL PAIN/VOMITING	123	100	122	96	37.3	19.8616	0	0	0	0	0	0	0	0	0	0	0	0	0	0	0	0	0	0	0	0	0	0	0	0	0
260319	2017-04-10	17:28:00	2	46	4	0	1	0	CHARCOAL	0	0	0	0	0	0	0		ABDOMINAL PAIN	134	91	102	99	37.3	22.8386	0	0	0	0	0	0	0	0	0	0	0	0	0	0	0	0	0	0	0	0	0	0	0	0	0
260333	2017-04-11	20:04:00	2	55	4	1	1	0	CHARCOAL	1	0	1	0	1	0	0		FEVER/HEADACHE	153	80	76	91	37.7	32.7694	0	0	0	0	0	0	0	0	0	0	0	0	0	0	0	0	0	0	0	0	0	0	0	0	0
260339	2017-04-15	08:30:00	2	27	4	1	1	0	CHARCOAL	0	0	0	0	0	0	0		FEVER/CHEST PAIN	129	70	95	99	36.4	20.3954	0	0	0	0	0	0	0	0	0	0	0	0	0	0	0	0	0	0	0	0	0	0	0	0	0
260342	2017-04-15	14:30:00	2	38	4	0	1	0	CHARCOAL	0	0	0	0	1	0	0		HEADACHE	108	74	86	98	36.2	19.6072	0	0	0	0	0	0	0	0	0	0	0	0	0	0	0	0	0	0	0	0	0	0	0	0	0
260343	2017-04-15	12:46:00	2	26	4	1	1	0	CHARCOAL	0	0	0	0	1	0	0		HEADACHE	124	77	110	98	38.1	19.5937	0	0	0	0	0	0	0	0	0	0	0	0	0	0	0	0	0	0	0	0	0	0	0	0	0
260348	2017-04-15	14:30:00	2	38	4	1	1	0	CHARCOAL	0	0	0	0	1	0	0		HEADACHE	108	74	86	98	36.2	19.6072	0	0	0	0	0	0	0	0	0	0	0	0	0	0	0	0	0	0	0	0	0	0	0	0	0
260349	2017-04-15	15:40:00	2	60	4	0	1	0	CHARCOAL	0	0	0	0	0	0	0		NO URINE OUTPUT	185	97	96	94	37.1	24.4246	0	0	0	0	0	0	0	0	0	0	0	0	0	0	0	0	0	0	0	0	0	0	0	0	0
260419	2017-04-19	13:10:00	2	44	4	1	1	0	CHARCOAL	1	0	0	0	1	0	0		HEADACHE	150	99	88	98	37.3	39.7354	0	0	0	0	0	0	0	0	0	0	0	0	0	0	0	0	0	0	0	0	0	0	0	0	0
260424	2017-04-19	10:27:00	2	53	4	0	1	0	CHARCOAL	0	0	0	1	1	0	0		HEADACHE	144	103	93	99	36	20.4165	0	0	0	0	0	0	0	0	0	0	0	0	0	0	0	0	0	0	0	0	0	0	0	0	0
260436	2017-04-19	18:43:00	2	20	4	1	1	0	FIREWOOD	0	0	0	0	1	0	0		HEADACHE	122	67	89	99	36.2	28.257	0	0	0	0	0	0	0	0	0	0	0	0	0	0	0	0	0	0	0	0	0	0	0	0	0
260464	2017-04-20	12:07:00	2	29	4	0	1	0	CHARCOAL	0	1	0	0	1	0	0		ABDOMINAL PAIN	107	60	63	99	35.6	21.9213	0	0	0	0	0	0	0	0	0	0	0	0	0	0	0	0	0	0	0	0	0	0	0	0	0
260519	2017-04-18	16:20:00	2	40	4	0	1	0	CHARCOAL	0	0	0	0	1	0	0		FEVER	149	88	74	98	36.6	23.634	0	0	0	0	0	0	0	0	0	0	0	0	0	0	0	0	0	0	0	0	0	0	0	0	0
260547	2017-04-24	13:26:00	2	29	4	0	1	0	CHARCOAL	0	0	0	0	1	0	0		LEFT FLANK PAIN	115	66	125	81	38.4	21.3341	0	0	0	0	0	0	0	0	0	0	0	0	0	0	0	0	0	0	0	0	0	0	0	0	0
260569	2017-04-24	17:40:00	2	34	4	1	1	1	CHARCOAL	0	0	0	0	1	0	0		RIB PAIN	104	78	98	99	36.7	18.5399	0	0	0	0	0	0	0	0	0	0	0	0	0	0	0	0	0	0	0	0	0	0	0	0	0
260572	2017-04-24	18:23:00	2	70	4	0	1	0	CHARCOAL	1	0	0	0	1	0	0		LOWER ABDOMEN PAIN	159	98	98	99	37.6	20.0319	0	0	0	0	0	0	0	0	0	0	0	0	0	0	0	0	0	0	0	0	0	0	0	0	0
260575	2017-04-24	03:00:00	2	64	4	0	1	1	FIREWOOD	1	0	0	0	0	0	0		URINARY RETENTION	202	165	49	98	37.2	18.7535	0	0	0	0	0	0	0	0	0	0	0	0	0	0	0	0	0	0	0	0	0	0	0	0	0
260591	2017-04-28	15:22:00	2	23	4	1	1	0	CHARCOAL	0	0	0	0	1	0	0		PAIN WHEN BREATHING/FEVERS	89	58	58	99	36.6	16.6077	0	0	0	0	0	0	0	0	0	0	0	0	0	0	0	0	0	0	0	0	0	0	0	0	0
260616	2017-04-28	10:55:00	2	37	4	0	1	0	CHARCOAL	0	1	0	0	1	0	0		FEVER	106	68	71	97	36.4	18.8797	0	0	0	0	0	0	0	0	0	0	0	0	0	0	0	0	0	0	0	0	0	0	0	0	0
260645	2017-04-28	21:48:00	2	23	4	0	1	0	CHARCOAL	0	0	0	0	1	0	0		ABDOMINAL PAIN	130	84	81	99	37.1	22.1524	0	0	0	0	0	0	0	0	0	0	0	0	0	0	0	0	0	0	0	0	0	0	0	0	0
260653	2017-04-29	06:46:00	2	52	4	1	1	0		0	0	1	0	1	0	0		HEADACHE	118	78	79	98	36.8	36.5922	0	0	0	0	0	0	0	0	0	0	0	0	0	0	0	0	0	0	0	0	0	0	0	0	0
260662	2017-04-22		2	20	4	1	1	0	CHARCOAL	0	0	0	0	0	0	0		ABDOMINAL DISTENSION	95	56	107	97	36.8	20.1891	0	0	0	0	0	0	0	0	0	0	0	0	0	0	0	0	0	0	0	0	0	0	0	0	0
260666	2017-04-22	14:00:00	2	37	4	1	1	0	CHARCOAL	0	0	0	0	0	0	0		HEADACHE/FEVER	138	100	97	97	35.8	31.5399	0	0	0	0	0	0	0	0	0	0	0	0	0	0	0	0	0	0	0	0	0	0	0	0	0
260690	2017-04-26	15:36:00	2	75	4	0	1	0	CHARCOAL	1	0	0	0	0	0	0		DYSURIA	162	98	112	94	36.4	23.1562	0	0	0	0	0	0	0	0	0	0	0	0	0	0	0	0	0	0	0	0	0	0	0	0	0
918237	2017-10-02	08:28:00	2	37	4	1	1	0	FIREWOOD	0	0	0	0	0	0	0		COUGH	117	87	98		37.3	24.4985	0	0	0	0	0	0	0	0	0	0	0	0	0	0	0	0	0	0	0	0	0	0	0	0	0
918299	2017-10-04	10:45:00	2	20	4	1	1	0	CHARCOAL	1	0	0	0	1	0	0		STOMACH ACHE	118	76	76	98	35.5	25.204	0	0	0	0	0	0	0	0	0	0	0	0	0	0	0	0	0	0	0	0	0	0	0	0	0
9182164	2017-10-06	17:32:00	2	24	4	0	1		CHARCOAL				0	0	0	0		HEAD PAIN/JOINT PAIN	112	71	69	100	36.6	22.52	0	0	0	0	0	0	0	0	0	0	0	0	0	0	0	0	0	0	0	0	0	0	0	0	0
9182211	2017-10-07	10:00:00	2	20	4	0	1		CHARCOAL				0	0	0	0		BLEEDING FROM NOSE	142	76	88	98	36.4	22.3569	1	0	0	0	0	0	0	0	0	0	0	0	0	0	0	0	0	0	0	0	0	0	0	0	0
9182216	2017-10-07	10:39:00	2	58	4	0	1		CHARCOAL				0	0	0	0		STOMACH SWELLING	109	83	100	99	36.2	22.1436	0	0	0	0	0	0	0	0	0	0	0	0	0	0	0	0	0	0	0	0	0	0	0	0	0
9182235	2017-10-08	10:16:00	2	20	4	1	1		CHARCOAL				0	1	0	0		HEADACHE/FEVER/GENERALIZED WEAKNESS/AMENORRHOEA FOR 2 MONTHS	119	73	95	95	37	23.1848	0	0	0	0	0	0	0	0	0	0	0	0	0	0	0	0	0	0	0	0	0	0	0	0	0
9182258	2017-10-08	23:18:00	2	28	4	1	1		CHARCOAL				0	1	0	0		FEVER	102	69	108	98	36.4	20.8889	0	0	0	0	0	0	0	0	0	0	0	0	0	0	0	0	0	0	0	0	0	0	0	0	0
9182285	2017-10-09	13:27:00	2	39	4	1	1		FIREWOOD				0	0	0	0		HEADACHE	125	90	94	99	36.6	20.4043	0	0	0	0	0	0	0	0	0	0	0	0	0	0	0	0	0	0	0	0	0	0	0	0	0
9182287	2017-10-09	15:17:00	2	39	4	1	1		CHARCOAL				0	1	0	0		FEVER	112	73	98	99	38.3	32.6222	0	0	0	0	0	0	0	0	0	0	0	0	0	0	0	0	0	0	0	0	0	0	0	0	0
9182304	2017-10-10	06:11:00	2	47	4	1	1	0	CHARCOAL	1	0	0	0	1	0	0		RIGHT HAND BLEEDING	155	103	83	98	36.5	26.7818	0	0	0	0	0	1	0	0	0	0	0	0	0	0	0	0	0	0	0	0	0	0	0	0	0
9182346	2017-10-11	08:45:00	2	29	4	0	1		CHARCOAL				0	1	0	0		RIGHT HYPOCHONDRIUM PAIN	137	90	77	98	36.2	19.8141	0	0	0	0	0	0	0	0	0	0	0	0	0	0	0	0	0	0	0	0	0	0	0	0	0
9182359	2017-10-11	11:21:00	2	50	4	1	1		FIREWOOD				0	1	0	0		HEADACHE/FEVER	107	72	137	98	37.6	21.5645	0	0	0	0	0	0	0	0	0	0	0	0	0	0	0	0	0	0	0	0	0	0	0	0	0
9182368	2017-10-11	16:01:00	2	32	4	0	1		CHARCOAL				0	1	0	0		JOINT PAIN	134	84	93	87	38.1	26.6728	0	0	0	0	0	0	0	0	0	0	0	0	0	0	0	0	0	0	0	0	0	0	0	0	0
9182412	2017-10-13	02:33:00	2	46	4	0	1		CHARCOAL				0	1	0	0		HEADACHE	120	81	59	98	36.3	21.7193	0	0	0	0	0	0	0	0	0	0	0	0	0	0	0	0	0	0	0	0	0	0	0	0	0
9182429	2017-10-13	11:13:00	2	47	4	0	1	0	CHARCOAL	0	1	0	1	1	0	0		HEADACHE	125	84	103	98	36.4	21.3578	0	0	0	0	0	0	0	0	0	0	0	0	0	0	0	0	0	0	0	0	0	0	0	0	0
9182436	2017-10-13	13:34:00	2	29	4	0	1		CHARCOAL				0	1	0	0		SHIVERS	131	80	89	97	36.6	22.3403	0	0	0	0	0	0	0	0	0	0	0	0	0	0	0	0	0	0	0	0	0	0	0	0	0
9182438	2017-10-13	15:13:00	2	35	4	1	1		CHARCOAL				0	1	0	0		HEADACHE	115	76	72	99	34.5	21.0603	0	0	0	0	0	0	0	0	0	0	0	0	0	0	0	0	0	0	0	0	0	0	0	0	0
9182442	2017-10-13	16:33:00	2	32	4	0	1		CHARCOAL				0	1	0	0		ABDOMINAL PAIN	121	64	90	98	36.1	23.3377	0	0	0	0	0	0	0	0	0	0	0	0	0	0	0	0	0	0	0	0	0	0	0	0	0
9182455	2017-10-14	08:28:00	2	51	4	1	1		CHARCOAL				0	1	0	0		HEADACHE/LUMBAR PAIN	121	78	117	98	39	26.4	0	0	0	0	0	0	0	0	0	0	0	0	0	0	0	0	0	0	0	0	0	0	0	0	0
9182472	2017-10-14	17:03:00	2	53	4	0	1	0	CHARCOAL	1	0	0	0	1	0	0		FEVER	159	99	110	98	38.8	34.4079	0	0	0	0	0	0	0	0	0	0	0	0	0	0	0	0	0	0	0	0	0	0	0	0	0
9182509	2017-10-15	15:35:00	2	33	4	1	1	1	CHARCOAL	1	0	0	0	0	0	0		AGGRESSION	123	93	92	99	36.3	25.7487	0	0	0	0	0	0	0	0	0	0	0	0	0	0	0	0	0	0	0	0	0	0	0	0	0
9182514	2017-10-15	17:17:00	2	37	4	1	1	1	CHARCOAL	1	0	0	0	0	0	0		HEADACHE/ARTHRALGIA/FEVER	149	104	103	99	36.2	31.3652	0	0	0	0	0	0	0	0	0	0	0	0	0	0	0	0	0	0	0	0	0	0	0	0	0
9182525	2017-10-15	20:17:00	2	52	4	0	1		CHARCOAL				0	1	0	0		HEADACHE/FEVER	93	63	95	96	36.7	24.0454	0	0	0	0	0	0	0	0	0	0	0	0	0	0	0	0	0	0	0	0	0	0	0	0	0
9182530	2017-10-15	21:32:00	2	39	4	1	1		CHARCOAL				0	1	0	0		ARTHRALGIA/HEADACHE	143	93	100	66	36	29.9404	0	0	0	0	0	0	0	0	0	0	0	0	0	0	0	0	0	0	0	0	0	0	0	0	0
9182545	2017-10-16	09:00:00	2	32	4	0	1	0	CHARCOAL	1	0	0	0	0	0	0		HEADACHE	130	82	68	99	35.7	26.1674	0	0	0	0	0	0	0	0	0	0	0	0	0	0	0	0	0	0	0	0	0	0	0	0	0
9182554	2017-10-16	10:50:00	2	38	4	1	1		FIREWOOD				0	0	0	0		HYPOGRASTIC REGION PAIN							0	0	0	0	0	0	0	0	0	0	0	0	0	0	0	0	0	0	0	0	0	0	0	0	0
9182585	2017-10-16	22:50:00	2	27	4	0	1		GAS+FIREWOOD				0	1	0	0		PAIN IN LOWER ABDOMEN	134	90	61	99	35.8	21.7193	0	0	0	0	0	0	0	0	0	0	0	0	0	0	0	0	0	0	0	0	0	0	0	0	0
9182604	2017-10-17	09:09:00	2	35	4	0	1		CHARCOAL				0	1	0	0		CHEST PAIN	148	91	75	99	36.5	21.3587	0	0	0	0	0	0	0	0	0	0	0	0	0	0	0	0	0	0	0	0	0	0	0	0	0
9182609	2017-10-17	10:00:00	2	24	4	1	1	1	CHARCOAL	0	0	0	0	0	0	0		CHEST PAIN	131	84	80	98	36.2	18.7197	0	0	0	0	0	0	0	0	0	0	0	0	0	0	0	0	0	0	0	0	0	0	0	0	0
9182616	2017-10-17	10:23:00	2	42	4	1	1		FIREWOOD				0	0	0	0		ABDOMINAL PAIN	113	61	112	98	36.5	23.594	0	0	0	0	0	0	0	0	0	0	0	0	0	0	0	0	0	0	0	0	0	0	0	0	0
9182624	2017-10-17	11:38:00	2	20	4	0	1		CHARCOAL				0	0	0	0		ABDOMINAL PAIN	139	83	83	99	36.9	23.3203	0	0	0	0	0	0	0	0	0	0	0	0	0	0	0	0	0	0	0	0	0	0	0	0	0
9182657	2017-10-18	08:25:00	2	23	4	1	1		CHARCOAL				0	1	0	0		LARYNX PAIN	123	83	91	98	36.9	21.1226	0	0	0	0	0	0	0	0	0	0	0	0	0	0	0	0	0	0	0	0	0	0	0	0	0
9182714	2017-10-19	05:35:00	2	21	4	0	1		CHARCOAL				0	0	0	0		RIGHT WRIST PAIN	120	69	66	99	37.1	26.3879	0	0	0	0	0	0	0	0	0	0	0	0	0	0	0	0	0	0	0	0	0	0	0	0	0
9182716	2017-10-19	06:31:00	2	37	4	1	1	0	CHARCOAL	0	0	0	0	1	0	0		CHEST PAIN	104	78	120	99	37	19.9111	0	0	0	0	0	0	0	0	0	0	0	0	0	0	0	0	0	0	0	0	0	0	0	0	0
9182744	2017-10-19	12:45:00	2	25	4	0	1		CHARCOAL				0	0	0	0		FEVER	115	74	76	98	37	18.9453	0	0	0	0	0	0	0	0	0	0	0	0	0	0	0	0	0	0	0	0	0	0	0	0	0
9182752	2017-10-19	16:39:00	2	32	4	1	1	0		1	0	0	0	1	0	0		FEVER	129	82	104	98	39.1	21.2239	0	0	0	0	0	0	0	0	0	0	0	0	0	0	0	0	0	0	0	0	0	0	0	0	0
9182759	2017-10-19	18:37:00	2	25	4	1	1		CHARCOAL				0	0	0	0		FEVER	120	72	122	99	37.3	19.3548	0	0	0	0	0	0	0	0	0	0	0	0	0	0	0	0	0	0	0	0	0	0	0	0	0
9182775	2017-10-20	08:46:00	2	42	4	0	1		CHARCOAL				0	1	0	0		CHEST PAIN	101	64	138	98	37.7	16.8886	0	0	0	0	0	0	0	0	0	0	0	0	0	0	0	0	0	0	0	0	0	0	0	0	0
9182782	2017-10-20	10:22:00	2	27	4	1	1		CHARCOAL				0	1	0	0		HEADACHE	154	108	110	99	36.5	29.9878	0	0	0	0	0	0	0	0	0	0	0	0	0	0	0	0	0	0	0	0	0	0	0	0	0
9182813	2017-10-21	06:13:00	2	27	4	0	1	0	CHARCOAL	0	0	0	0	0	0	0		ABDOMINAL PAIN	134	97	54	99	36.8	25.721	1	0	0	0	0	0	0	0	0	0	0	0	0	0	0	0	0	0	0	0	0	0	0	0	0
9182875	2017-10-22	06:15:00	2	29	4	0	1		CHARCOAL				0	1	0	0		CHEST PAIN	125	89	73	99	37.4	27.31	0	0	0	0	0	0	0	0	0	0	0	0	0	0	0	0	0	0	0	0	0	0	0	0	0
9182914	2017-10-22	17:22:00	2	22	4	1	1	1		0	0	0	0	1	0	0		DIZZINESS/HEADACHE	96	67	99	98	36.3	19.3438	0	0	0	0	0	0	0	0	0	0	0	0	0	0	0	0	0	0	0	0	0	0	0	0	0
9182921	2017-10-22	20:05:00	2	51	4	1	1	1	CHARCOAL	1	0	0	0	1	0	0		PHYSICAL AGGRESSION	143	103	73	99	35.9	20.4529	0	0	0	0	0	0	0	0	0	0	0	1	0	0	0	0	0	0	0	0	0	0	0	0	0
9182926	2017-10-22	21:10:00	2	30	4	1	1	1	CHARCOAL	0	0	0	0	0	0	0		PHYSICAL AGGRESSION	123	88	97	97	33.9	26.9605	0	0	0	0	0	0	0	0	0	0	0	0	0	0	0	0	0	0	0	0	0	0	0	0	0
9182934	2017-10-23	05:36:00	2	23	4	1	1	0	CHARCOAL	1	0	0	0	0	0	0		CHEST PAIN/GENERALIZED WEAKNESS	104	68	68	96	37	17.3373	0	0	0	0	0	0	0	0	0	0	0	0	0	0	0	0	0	0	0	0	0	0	0	0	0
9182956	2017-10-23	10:00:00	2	37	4	1	1	1	CHARCOAL	1	0	0	0	0	0	0		HEADACHE	124	84	79	98	37.1	29.3444	0	0	0	0	0	0	0	0	0	0	0	0	0	0	0	0	0	0	0	0	0	0	0	0	0
9182963	2017-10-23	11:35:00	2	37	4	0	1		CHARCOAL				0	1	0	0		HEAD PAIN/CERVICAL REGION PAIN	137	93	67	99	35.8	22.8564	0	0	0	0	0	0	0	0	0	0	0	0	0	0	0	0	0	0	0	0	0	0	0	0	0
9182993	2017-10-24	05:50:00	2	29	4	1	1		CHARCOAL				0	1	0	0		CHEST PAIN	121	84	87	99	36.4	21.9899	0	0	0	0	0	0	0	0	0	0	0	0	0	0	0	0	0	0	0	0	0	0	0	0	0
9182996	2017-10-24	06:20:00	2	50	4	1	1		CHARCOAL				0	1	0	0		ABDOMINAL PAIN	131	89	93	99	36	23.3323	0	0	0	0	0	0	0	0	0	0	0	0	0	0	0	0	0	0	0	0	0	0	0	0	0
91821001	2017-10-24	08:42:00	2	27	4	1	1		CHARCOAL				0	1	0	0		HEAD PAIN POST PHYSICAL AGGRESSION	106	66	78	98	36.3	24.4745	0	0	0	0	0	0	0	0	0	0	0	1	0	0	0	0	0	0	0	0	0	0	0	0	0
91821010	2017-10-24	10:14:00	2	33	4	1	1		CHARCOAL				0	0	0	0		WEAKNESS	104	70	86	99	35.8	23.5516	0	0	0	0	0	0	0	0	0	0	0	0	0	0	0	0	0	0	0	0	0	0	0	0	0
91821018	2017-10-24	11:39:00	2	20	4	0	1		CHARCOAL				0	0	0	0		FEVER	122	70	90	97	38.3	27.8876	0	0	0	0	0	0	0	0	0	0	0	0	0	0	0	0	0	0	0	0	0	0	0	0	0
91821037	2017-10-24	20:00:00	2	49	4	1	1		CHARCOAL				0	1	0	0		HEADACHE	146	96	62	98	36.7	42.3625	0	0	0	0	0	0	0	0	0	0	0	0	0	0	0	0	0	0	0	0	0	0	0	0	0
91821042	2017-10-24	22:18:00	2	21	4	1	1		CHARCOAL				0	1	0	0		HEADACHE	105	68	74	98	36.2	24.6429	0	0	0	0	0	0	0	0	0	0	0	0	0	0	0	0	0	0	0	0	0	0	0	0	0
91821048	2017-10-26	05:13:00	2	25	4	0	1		CHARCOAL				0	1	0	0		ABDOMINAL PAIN	144	79	80	97	36.8	28.1392	0	0	0	0	0	0	0	0	0	0	0	0	0	0	0	0	0	0	0	0	0	0	0	0	0
91821053	2017-10-26	06:24:00	2	23	4	1	1		CHARCOAL				0	1	0	0		ABDOMINAL PAIN	104	63	70	99	36.6	21.5181	0	0	0	0	0	0	0	0	0	0	0	0	0	0	0	0	0	0	0	0	0	0	0	0	0
91821059	2017-10-25	05:19:00	2	25	4	0	1		CHARCOAL				0	1	0	0		ABDOMINAL PAIN	136	74	74	97	36.8	23.6652	0	0	0	0	0	0	0	0	0	0	0	0	0	0	0	0	0	0	0	0	0	0	0	0	0
91821061	2017-10-25	08:33:00	2	55	4	0	1	0	CHARCOAL	1	0	0	0	1	0	0		ABDOMINAL PAIN	104	68	46	99	36.5	23.381	0	0	0	0	0	0	0	0	0	0	0	0	0	0	0	0	0	0	0	0	0	0	0	0	0
91821063	2017-10-25	08:53:00	2	29	4	0	1		FIREWOOD				1	0	0	0		URINARY RETENTION	116	77	88	99	35.3	17.5	0	0	0	0	0	0	0	0	0	0	0	0	0	0	0	0	0	0	0	0	0	0	0	0	0
91821072	2017-10-25	10:16:00	2	23	4	0	1		CHARCOAL				0	0	0	0		HEADACHE	128	87	73	99	37.1	19.3698	0	0	0	0	0	0	0	0	0	0	0	0	0	0	0	0	0	0	0	0	0	0	0	0	0
91821083	2017-10-25	14:55:00	2	34	4	0	1		CHARCOAL				0	0	0	0		LOSS OF CONSCIOUSNESS	144	89	100	97	37.6	22.7537	0	0	0	0	0	0	0	0	0	0	0	0	0	0	0	0	0	0	0	0	0	0	0	0	0
91821108	2017-10-26	10:06:00	2	51	4	0	1		FIREWOOD				0	1	0	0		HICCUPS	116	64	99	96	36	25.9184	0	0	0	0	0	0	0	0	0	0	0	0	0	0	0	0	0	0	0	0	0	0	0	0	0
91821144	2017-10-27	06:27:00	2	29	4	1	1		FIREWOOD				0	0	0	0		PHYSICAL AGGRESSION	128	86	78	98	36	23.5024	0	0	0	0	0	0	0	0	0	0	0	0	0	0	0	0	0	0	0	0	0	0	0	0	0
91821148	2017-10-27	17:58:00	2	37	4	1	1	0	CHARCOAL	0	0	0	0	0	0	0		FEVER	122	79	144		38	26.733	0	0	0	0	0	0	0	0	0	0	0	0	0	0	0	0	0	0	0	0	0	0	0	0	0
91821155	2017-10-27	08:45:00	2	22	4	1	1		CHARCOAL				0	0	0	0		FEVER	121	78	100		39	26.7188	0	0	0	0	0	0	0	0	0	0	0	0	0	0	0	0	0	0	0	0	0	0	0	0	0
91821178	2017-10-27	14:58:00	2	21	4	1	1	0	CHARCOAL	1	0	0	0	0	0	0		PHYSICAL AGGRESSION	115	70	101	99	36.7	30.1679	0	0	0	0	0	0	0	0	0	0	0	1	0	0	0	0	0	0	0	0	0	0	0	0	0
91821185	2017-10-27	17:55:00	2	22	4	1	1		CHARCOAL				0	0	0	0		STOMACH ACHE	91	62	80	98	36	24.9896	0	0	0	0	0	0	0	0	0	0	0	0	0	0	0	0	0	0	0	0	0	0	0	0	0
91821194	2017-10-27	22:53:00	2	22	4	1	1		GAS+CHARCOAL				0	1	0	0		ABDOMINAL PAIN	127	79	64	99	35.5	20.8304	0	0	0	0	0	0	0	0	0	0	0	0	0	0	0	0	0	0	0	0	0	0	0	0	0
91821197	2017-10-28	06:51:00	2	28	4	1	1		CHARCOAL				0	1	0	0		ABDOMINAL PAIN	105	76	91	98	36.9	18.2869	0	0	0	0	0	0	0	0	0	0	0	0	0	0	0	0	0	0	0	0	0	0	0	0	0
91821258	2017-10-29	12:02:00	2	38	4	1	1	1	GAS+CHARCOAL	1	0	0	0	0	0	0		WEAKNESS/FEVER	101	67	88	99	37.1	37.534	0	0	0	0	0	0	0	0	0	0	0	0	0	0	0	0	0	0	0	0	0	0	0	0	0
91821259	2017-10-29	12:31:00	2	30	4	1	1	0	CHARCOAL	1	0	0	1	1	0	0		HEADACHE	155	133	99	98	37	29.7607	0	0	0	0	0	0	0	0	0	0	0	0	0	0	0	0	0	0	0	0	0	0	0	0	0
91821274	2017-10-29	20:16:00	2	30	4	1	1	0	CHARCOAL	1	0	0	1	1	0	0		HEADACHE	120	85	115		37.2	28.8856	0	0	0	0	0	0	0	0	0	0	0	0	0	0	0	0	0	0	0	0	0	0	0	0	0
91821282	2017-10-30	06:38:00	2	20	4	1	1		CHARCOAL				0	1	0	0		HEAD PAIN/PALPITATIONS	98	80	122		34.7	33.9335	0	0	0	0	0	0	0	0	0	0	0	0	0	0	0	0	0	0	0	0	0	0	0	0	0
91821291	2017-10-30	09:18:00	2	36	4	0	1	0	CHARCOAL	1	0	0	0	0	0	0		HEADACHE	120	80			36.5	23.6336	0	0	0	0	0	0	0	0	0	0	0	0	0	0	0	0	0	0	0	0	0	0	0	0	0
91821294	2017-10-30	09:30:00	2	35	4	0	1	0	CHARCOAL	0	1	0	0	1	0	0		LEFT FOOT SWELLING	124	93	114		37.9	20.3802	0	1	0	0	0	0	0	0	0	0	0	0	0	0	0	0	0	0	0	0	0	0	0	0	0
91821317	2017-10-30	16:54:00	2	47	4	0	1	0	CHARCOAL	1	0	0	0	0	0	0		FEVER	117	78	100	99	38.7	20.8221	0	0	0	0	0	0	0	0	0	0	0	0	0	0	0	0	0	0	0	0	0	0	0	0	0
260562	2017-04-24	16:00:00	2	23	4	1	1	0	CHARCOAL	0	0	0	0	1	0	0		LOWER ABDOMEN PAIN	147	96	110	98	37.2	21.9727	0	0	0	0	0	0	0	0	0	0	0	0	0	0	0	0	0	0	0	0	0	0	0	0	0
9182299	2017-10-09	21:08:00	2	22	4	1	1		CHARCOAL				0	1	0	0		ABDOMINAL PAIN	142	93	78	99	36.3	26.807	0	0	0	0	0	0	0	0	0	0	0	0	0	0	0	0	0	0	0	0	0	0	0	0	0
9182444	2017-10-13	17:31:00	2	20	4	1	1		CHARCOAL				0	1	0	0		SPONTANEOUS ABORTION	114	69	63	99	35.6	23.4898	0	0	0	0	0	0	0	0	0	0	0	0	0	0	0	0	0	0	0	0	0	0	0	0	0
9182763	2017-10-19	22:33:00	2	22	4	1	1		CHARCOAL				0	0	0	0		VAGINAL BLEEDING POST FALL	115	57	76	99	34.8	13.5692	0	0	0	0	0	0	0	0	0	0	0	0	0	0	0	0	0	0	0	0	0	0	0	0	0
240011	2017-04-01		2	87	4	0	1	1	CHARCOAL+FIREWOOD	0	0	0	0	1	0	0		DISURIA/CONSTIPATION	153	82	72	84	36.8	19.1001	0	0	0	0	0	0	0	0	0	0	0	0	0	0	0	0	0	0	0	0	0	0	0	0	0
240150	2017-04-07		2	30	4	0	1	0	CHARCOAL	0	0	0	0	1	0	0		DIFFICULTY BREATHING	100	52	135	83	39.8	30.111	0	0	0	0	0	0	0	0	0	0	0	0	0	0	0	0	0	0	0	0	0	0	0	0	0
240165	2017-04-07	10:30:00	2	33	4	1	1	0	CHARCOAL	0	0	0	0	1	0	0		ABDOMINAL PAIN	116	74	79	98	37	19.8222	0	0	0	0	0	0	0	0	0	0	0	0	0	0	0	0	0	0	0	0	0	0	0	0	0
240297	2017-04-13	11:52:00	2	42	4	1	1	0	FIREWOOD	1	0	0	0	1	0	0		LOWER ABDOMEN PAIN	100	72	91	99	35.5	17.8982	0	0	0	0	0	0	0	0	0	0	0	0	0	0	0	0	0	0	0	0	0	0	0	0	0
240301	2017-04-13	12:23:00	2	30	4	1	1	0	FIREWOOD	0	0	0	0	1	0	0		PAIN ON URINATION	71	59	127	99	38	12.6004	0	0	0	0	0	0	0	0	0	0	0	0	0	0	0	0	0	0	0	0	0	0	0	0	0
240334	2017-04-13	01:00:00	2	68	4	0	1	0	CHARCOAL	1	0	0	0	0	0	0		DIFFICULTY BREATHING	155	86	74	78	35.6		0	0	0	0	0	0	0	0	0	0	0	0	0	0	0	0	0	0	0	0	0	0	0	0	0
240389	2017-04-17	17:40:00	2	33	4	1	1	0	CHARCOAL	0	0	0	0	0	0	0		ABDOMINAL PAIN	114	80	95	98	37.3	36.9001	0	0	0	0	0	0	0	0	0	0	0	0	0	0	0	0	0	0	0	0	0	0	0	0	0
240471	2017-04-22	07:00:00	2	45	4	1	1	0	CHARCOAL	0	1	0	0	1	0	0		NECK PAIN	101	86	96	98	36.2	17.5414	0	0	0	0	0	0	0	0	0	0	0	0	0	0	0	0	0	0	0	0	0	0	0	0	0
240482	2017-04-21	11:50:00	2	39	4	0	1	0	CHARCOAL	0	0	0	0	1	0	0		PAIN IN AXILLARY REGION	142	85	84	95	36	24.1358	0	0	0	0	0	0	0	0	0	0	0	0	0	0	0	0	0	0	0	0	0	0	0	0	0
260060	2017-04-04	11:30:00	2	83	4	1	1	0	FIREWOOD	0	0	0	0	1	0	0		TUMOR ON UPPER LIP	137	87	106	99	37.3	28.4444	0	0	0	0	0	0	0	0	0	0	0	0	0	0	0	0	0	0	0	0	0	0	0	0	0
260312	2017-04-10	10:31:00	2	44	4	1	1	0	CHARCOAL	0	0	0	0	0	0	0		LOWER ABDOMEN PAIN	124	78	102	98	37	17.4554	0	0	0	0	0	0	0	0	0	0	0	0	0	0	0	0	0	0	0	0	0	0	0	0	0
260500	2017-04-18		2	52	4	1	1	0	CHARCOAL	0	0	0	0	1	0	0		NECK TUMOR	99	81	114	94	37.4		1	0	0	0	0	0	0	0	0	0	1	0	0	0	0	0	0	0	0	0	0	0	0	0	0
260516	2017-04-18	15:34:00	2	20	4	0	1	0	CHARCOAL	0	0	0	0	1	0	0		TUMOR OF THE CERVICAL REGION	143	77	93	95	35.7	20.7207	0	0	0	0	0	0	0	0	0	0	0	0	0	0	0	0	0	0	0	0	0	0	0	0	0
260709	2017-04-26	12:37:00	2	37	4	0	1	0	CHARCOAL	0	0	0	0	0	0	0		WOUND TO LEGS	117	78	92	98	36.5	21.5225	0	0	0	0	0	0	0	0	0	0	0	0	0	0	0	0	0	0	0	0	0	0	0	0	0
9182102	2017-10-04	15:27:00	2	24	4	0	1		CHARCOAL				0	0	0	0		INCREASED VOLUME OF RIGHT KNEE	127	77	89	99	38.7	23.4339	0	0	0	1	0	0	0	0	0	0	0	0	0	0	0	0	0	0	0	0	0	0	0	0	0
9182591	2017-10-17	05:45:00	2	55	4	1	1	0	CHARCOAL	1	0	0	0	1	0	0		DIFFICULTY SWALLOWING	169	103	62	99	35.6	26.054	0	0	0	0	0	0	0	0	0	0	0	0	0	0	0	0	0	0	0	0	0	0	0	0	0
240026	2017-04-01		2	28	4	0	1	1	CHARCOAL	0	0	0	0	1	0	0		HEADACHE/DELIRIOS	167	105	86	98	37	21.3747	0	0	0	0	0	0	0	0	0	0	0	0	0	0	0	0	0	0	0	0	0	0	0	0	0
240095	2017-04-05	12:00:00	2	22	4	0	1	0	CHARCOAL	0	0	0	0	1	0	0		HEADACHE	108	74	75	99	36	18.1375	0	0	0	0	0	0	0	0	0	0	0	0	0	0	0	0	0	0	0	0	0	0	0	0	0
240407	2017-04-19		2	52	4	1	1	0	CHARCOAL	1	0	0	0	1	0	0		HEADACHE	161	102	58	97	36.8	21.0772	0	0	0	0	0	0	0	0	0	0	0	0	0	0	0	0	0	0	0	0	0	0	0	0	0
240534	2017-04-29	20:00:00	2	33	4	0	1	0	CHARCOAL	0	1	0	0	1	0	0		HEADACHE	101	70	86	97	36.2	24.3253	0	0	0	0	0	0	0	0	0	0	0	0	0	0	0	0	0	0	0	0	0	0	0	0	0
240536	2017-04-29	20:19:00	2	27	4	0	1	0	CHARCOAL	0	1	0	0	1	0	0		HEADACHE	120	78	73	98	34.2	22.8883	0	0	0	0	0	0	0	0	0	0	0	0	0	0	0	0	0	0	0	0	0	0	0	0	0
260022	2017-04-02	11:43:00	2	20	4	1	1	0	CHARCOAL	0	0	0	0	1	0	0		PRECORDIAL PAIN	124	75	72	99	35.6	24.4329	0	0	0	0	0	0	0	0	0	0	0	0	0	0	0	0	0	0	0	0	0	0	0	0	0
260127	2017-04-06	20:50:00	2	38	4	0	1	0	CHARCOAL	1	0	0	0	1	0	0		CONVULSIONS	150	97	69	96	36.8	22.4528	0	0	0	0	0	0	0	0	0	0	0	0	0	0	0	0	0	0	0	0	0	0	0	0	0
260387	2017-04-16	21:00:00	2	58	4	1	1	1	CHARCOAL	1	0	0	0	1	0	0		MUSCLE WEAKNESS	146	86	83	98	34.9	20.8701	0	0	0	0	0	0	0	0	0	0	0	0	0	0	0	0	0	0	0	0	0	0	0	0	0
9182159	2017-10-06	20:29:00	2	25	4	1	1	1	CHARCOAL	0	0	0	0	0	0	0		PALPITATIONS/INSOMNIA	124	89	89	98	36.2	19.052	0	0	0	0	0	0	0	0	0	0	0	0	0	0	0	0	0	0	0	0	0	0	0	0	0
9182553	2017-10-16	10:27:00	2	31	4	0	1	0	CHARCOAL	1	0	0	0	0	0	0		HEADACHE/DIZZINESS	110	80	87	98	34.9	18.4816	0	0	0	0	0	0	0	0	0	0	0	0	0	0	0	0	0	0	0	0	0	0	0	0	0
9182565	2017-10-16	12:59:00	2	26	4	1	1		CHARCOAL				0	0	0	0		DEPRESSION/WEAKNESS/NEGATIVE THOUGHTS	107	97	87	98	32.2	25.9287	0	0	0	0	0	0	0	0	0	0	0	0	0	0	0	0	0	0	0	0	0	0	0	0	0
91821135	2017-10-26	21:40:00	2	33	4	0	1	0	CHARCOAL	1	1	0	0	0	0	0		AGGRESSION	134	92	92	98	36.6	21.0715	0	0	0	0	0	0	0	0	0	0	0	0	0	0	0	0	0	0	0	0	0	0	0	0	0
91821220	2017-10-28	14:24:00	2	37	4	0	1	0	CHARCOAL+FIREWOOD	0	1	0	0	1	0	0		ALTERED BEHAVIOUR	114	80	129	98	36.2	19.6143	0	0	0	0	0	0	0	0	0	0	0	0	0	0	0	0	0	0	0	0	0	0	0	0	0
91821225	2017-10-28	16:26:00	2	24	4	1	1		CHARCOAL				0	1	0	0		ALTERED BEHAVIOUR	128	99	107		36.4	25.8857	0	0	0	0	0	0	0	0	0	0	0	0	0	0	0	0	0	0	0	0	0	0	0	0	0
240002	2017-04-01	08:11:00	2	22	4	0	1	0	CHARCOAL+FIREWOOD	0	0	0	0	1	0	0		LEFT LEG PAIN	127	78	62	98	37	20.9407	0	0	0	0	0	0	0	0	0	0	0	0	0	0	0	0	0	0	0	0	0	0	0	0	0
240016	2017-04-01		2	38	4	0	1	0	CHARCOAL	0	1	0	0	1	0	0		RIGHT KNEE PAIN	115	74	82	96	36.4	20.5078	0	0	0	0	1	0	0	0	0	0	0	0	0	0	0	0	0	0	0	0	0	0	0	0	0
240025	2017-04-01		2	27	4	1	1	0	CHARCOAL	0	0	0	0	1	0	0		HEADACHE	106	80	90	98	36.4	19.4588	0	0	0	0	0	0	0	0	0	0	0	0	0	0	0	0	0	0	0	0	0	0	0	0	0
240028	2017-04-02	22:20:00	2	30	4	0	1	0	CHARCOAL	0	0	0	0	1	0	0		RIGHT FOOT PAIN	141	88	62	96	36.2	23.1084	0	1	0	0	0	0	0	0	0	0	0	0	0	0	0	0	0	0	0	0	0	0	0	0	0
240029	2017-04-01	21:52:00	2	22	4	0	1	1	CHARCOAL	0	1	0	0	1	0	0		WHOLE BODY PAIN	122	70	88	96	36.6	19.9956	0	0	0	0	0	0	0	0	0	0	0	0	0	0	0	0	0	0	0	0	0	0	0	0	0
240030	2017-04-01	21:20:00	2	22	4	0	1	0	CHARCOAL	0	0	0	0	1	0	0		PHYSICAL AGGRESSION	104	47	77	96	36.7	21.2585	0	0	0	0	0	0	0	0	0	1	0	0	0	0	0	0	0	0	0	0	0	0	0	0	0
240032	2017-04-01		2	25	4	0	1	0		0	0	0	0	1	0	0		LOSS OF CONSCIOUSNESSAND MOVEMENT OF THE RIGHT SIDE	128	69	76	95	37.3	21.953	0	0	0	0	0	0	0	0	0	0	0	1	0	0	0	0	0	0	0	0	0	0	0	0	0
240054	2017-04-02	06:59:00	2	20	4	1	1	1	CHARCOAL	0	0	0	0	1	0	0		PAIN MOBILIZING RING FINGER	113	67	117	99	36.7	25.3749	0	0	0	0	0	0	0	0	0	0	0	0	0	0	0	1	0	0	0	0	0	0	0	0	0
240055	2017-04-02	07:18:00	2	64	4	1	1	1	CHARCOAL	1	1	0	0	1	0	0			184	117	72	86	37.5	25.0223	0	0	0	0	0	0	0	0	0	0	0	0	0	0	0	0	0	0	0	0	1	0	0	0	0
240056	2017-04-03	12:15:00	2	43	4	0	1	0	CHARCOAL	0	1	0	0	1	0	0		CHEST PAIN	118	72	96	99	37.4	20.6217	0	0	0	0	0	0	0	0	0	1	0	0	0	0	0	0	0	0	0	0	0	0	0	0	0
240058	2017-04-03	17:00:00	2	28	4	0	1	0	CHARCOAL	0	0	0	0	1	0	0		BODY ACHE/DIFFICULTY WALKING	121	75	90	99	36.7	22.0239	0	0	0	1	0	0	0	0	0	0	0	0	0	0	0	0	0	0	0	0	0	0	0	0	0
240059	2017-04-03	08:25:00	2	43	4	1	1	0	CHARCOAL+FIREWOOD	0	0	0	0	1	0	0		PAIN IN THE RIGHT THIGH	147	88	72	98	37.3	22.7646	0	0	0	0	1	0	0	0	0	0	0	0	0	0	0	0	0	0	0	0	0	0	0	0	0
240065	2017-04-03	08:35:00	2	21	4	0	1	0	CHARCOAL	0	0	0	0	1	0	0		PAIN IN THE RIGHT KNEE	137	83	97	96	37.4	21.708	0	0	0	0	0	0	0	0	0	0	0	0	0	0	0	0	0	1	0	0	0	0	0	0	0
240067	2017-04-03	12:20:00	2	30	4	0	1	1	CHARCOAL	0	0	0	0	1	0	0		RIGHT KNEE PAIN	101	86	96	95	36.2	21.7993	0	0	0	1	0	0	0	0	0	0	0	0	0	0	0	0	0	0	0	0	0	0	0	0	0
240073	2017-04-03	13:00:00	2	33	4	0	1	0	CHARCOAL+GAS	0	0	0	0	1	0	0		HEAD WOUND	99	74	105	99	37.1	20.3424	0	0	0	0	0	0	0	0	0	0	0	1	0	0	0	0	0	0	0	0	0	0	0	0	0
240090	2017-04-04	20:29:00	2	35	4	0	1	0	CHARCOAL	0	1	0	0	0	0	0		HEADACHE/PAIN RIGHT FOREARM	139	84	90	99	36.7	32.7186	0	0	0	0	0	0	0	0	0	0	0	0	0	0	0	0	0	0	0	0	0	0	0	0	0
240104	2017-04-05		2	23	4	0	1	0	CHARCOAL	0	0	0	0	0	0	0		RIGHT PAIN	123	59	73	99		17.7457	0	0	0	0	1	0	0	0	0	0	0	0	0	0	0	0	0	0	0	0	0	0	0	0	0
240105	2017-04-05	13:20:00	2	68	4	0	1	0	CHARCOAL	0	0	0	0	0	0	0		LEFT KNEE PAIN	128	93	101	96	37	18.5119	0	0	0	1	0	0	0	0	0	0	0	0	0	0	0	0	0	0	0	0	0	0	0	0	0
240108	2017-04-05	16:40:00	2	71	4	1	1	0	CHARCOAL	1	0	0	0	1	0	0		RIGHT KNEE PAIN	172	99	96	97	36.7	23.42	0	0	0	1	0	0	0	0	0	0	0	0	0	0	0	0	0	0	0	0	0	0	0	0	0
240157	2017-04-07	09:50:00	2	67	4	0	1	0	CHARCOAL	0	1	0	0	1	0	0		LIP PAIN	128	85	77	98	36.2	20.5095	0	0	0	0	0	0	0	0	0	0	0	1	0	0	0	0	0	0	0	0	0	0	0	0	0
240164	2017-04-07	12:45:00	2	50	4	1	1	0	CHARCOAL	0	0	0	0	1	0	0		RIGHT FOOT PAIN	176	89	88	99	37.4	23.3136	0	1	0	0	0	0	0	0	0	0	0	0	0	0	0	0	0	0	0	0	0	0	0	0	0
240170	2017-04-07	15:35:00	2	51	4	0	1	0	CHARCOAL	1	0	0	0	1	0	0		RIGHT FOOT PAIN	164	101	69	99	37.1	21.271	0	1	0	0	0	0	0	0	0	0	0	0	0	0	0	0	0	0	0	0	0	0	0	0	1
240187	2017-04-10	00:30:00	2	20	4	0	1	1	CHARCOAL	1	1	0	0	0	0	0		LEFT THUMB WOUND	141	83	107	94	36.2	24.5675	0	0	0	0	0	0	0	0	0	0	0	0	0	0	0	1	0	0	0	0	0	0	0	0	0
240199	2017-04-07	23:20:00	2	20	4	1	1	0	CHARCOAL	0	0	1	0	1	0	0		HEAD AND JAW PAIN	120	80	100	98	36.4	19.2277	0	0	0	0	0	0	0	0	0	0	0	0	0	0	0	0	0	0	0	0	0	0	0	0	0
240200	2017-04-07	22:09:00	2	32	4	0	1	0	CHARCOAL	0	0	0	1	0	0	0		MULTIPLE WOUNDS	122	89	106	98	36.8	20.9235	0	0	0	0	0	0	0	0	0	0	0	0	0	0	0	0	0	0	0	0	0	0	0	0	0
240232	2017-04-11	15:50:00	2	24	4	0	1	0	CHARCOAL	0	0	0	0	1	0	0		RIGHT KNEE PAIN	93	61	89	89	37.4	23.3425	0	0	0	1	0	0	0	0	0	0	0	0	0	0	0	0	0	0	0	0	0	0	0	0	0
240239	2017-04-07	02:20:00	2	30	4	1	1	0	FIREWOOD	0	0	0	0	1	0	0		INTENSE PAIN IN LEFT LEG	139	87	123	99	37.4	23.5482	0	0	0	0	0	0	0	0	0	0	0	0	0	1	0	0	0	0	0	0	0	0	0	0	0
240240	2017-04-07	01:38:00	2	22	4	1	1	0	CHARCOAL	0	0	0	0	0	0	0		FINGER PAIN LEFT HAND	120	90	102	98	37.5	21.1525	0	0	0	0	0	0	0	0	0	0	0	0	0	0	0	1	0	0	0	0	0	0	0	0	0
240252	2017-04-13	06:15:00	2	48	4	0	1	0	CHARCOAL	1	0	0	0	1	0	0		LIP SWELLING	163	103	85	98	36.3	30.1479	0	0	0	0	0	0	0	0	0	0	0	0	0	0	0	0	0	0	0	0	0	0	0	0	0
240253	2017-04-12	22:37:00	2	36	4	0	1	1	CHARCOAL	0	0	0	0	1	0	0		WOUND ON MIDDLE TOE LEFT FOOT	118	77	75	99	37	19.6287	0	0	0	0	0	0	0	0	0	0	0	0	0	0	0	0	0	0	0	1	0	0	0	0	0
240296	2017-04-13	11:45:00	2	33	4	1	1	0	CHARCOAL	1	0	0	0	1	0	0		CHEST PAIN	123	95	64	98	36.9	28.0889	0	0	0	0	0	0	0	0	1	1	0	0	1	0	0	0	0	0	0	0	0	0	0	0	0
240319	2017-04-14	15:50:00	2	23	4	0	1	0	CHARCOAL	0	0	0	0	1	0	0		RIGHT FOOT PAIN	202	107	107	98	36	22.4359	0	1	0	0	0	0	0	0	0	0	0	0	0	0	0	0	0	0	0	0	0	0	0	0	0
240322	2017-04-13	12:10:00	2	35	4	0	1	0	CHARCOAL	0	0	0	0	1	0	0		RIGHT KNEE PAIN	144	88	81	99	37.1	29.4023	0	0	0	1	0	0	0	0	0	0	0	0	0	0	0	0	0	0	0	0	0	0	0	0	0
240327	2017-04-13	12:40:00	2	31	4	1	1	0	CHARCOAL+FIREWOOD	1	0	0	0	1	0	0		BACK PAIN	143	88	108	98	36.8	19.9082	0	0	0	0	0	0	0	0	0	0	0	0	0	0	0	0	0	0	0	0	0	0	0	0	0
240346	2017-04-15	07:00:00	2	34	4	0	1	0	CHARCOAL	0	0	0	0	0	0	0		CHEST PAIN	127	91	63	97	36.9	18.897	0	0	0	0	0	0	0	0	1	1	0	0	1	0	0	0	0	0	0	0	0	0	0	0	0
240347	2017-04-15	04:50:00	2	22	4	0	1	0	CHARCOAL	0	0	0	0	0	0	0		BODY ACHE	131	76	87	87	36.7	21.3578	0	0	0	0	0	0	0	0	0	0	0	0	0	0	0	0	0	0	0	0	0	0	0	0	0
240350	2017-04-15	04:05:00	2	34	4	0	1	0	CHARCOAL	0	0	0	0	1	0	0		WOUNDS HEAD AND LEFT HAND	128	90	90	98	37.2	21.7143	0	0	0	0	0	0	0	0	0	0	0	0	0	0	0	0	0	0	0	0	0	0	0	0	0
240352	2017-04-15	23:30:00	2	20	4	0	1	0	CHARCOAL	0	0	0	0	1	0	0		PAIN THROUGHOUT BODY	107	66	79	95	35.9	24.5205	0	0	0	0	0	1	1	0	1	0	0	1	1	0	1	1	0	0	0	0	0	0	0	0	0
240353	2017-04-14	20:45:00	2	57	4	0	1	0	CHARCOAL	1	0	0	0	1	0	0		CHEST WOUND	138	88	86	89	36.2	25.3444	0	0	0	0	0	0	0	0	1	1	0	0	0	0	0	0	0	0	0	0	0	0	0	0	0
240355	2017-04-14	19:17:00	2	30	4	0	1	0	CHARCOAL	0	1	0	0	1	0	0		RIGHT KNEE PAIN	135	79	105	95	37.3	23.2485	0	0	0	1	0	0	0	0	0	0	0	0	0	0	0	0	0	0	0	0	0	0	0	0	0
240357	2017-04-17	12:07:00	2	41	4	1	1	0	CHARCOAL	0	0	0	0	0	0	0		RIGHT KNEE PAIN AND ABRASION	135	92	100	98	36.6	21.1023	0	0	0	0	0	0	0	0	0	0	0	0	0	0	0	0	0	0	0	0	0	0	0	0	0
240358	2017-04-17	09:46:00	2	32	4	1	1	0	CHARCOAL+GAS	0	0	0	0	0	0	0		CHEST PAIN	110	76	87	98	36.8	62.4051	0	0	0	0	0	0	0	0	0	1	0	0	0	0	0	0	0	0	0	0	0	0	0	0	0
240359	2017-04-17	08:18:00	2	23	4	0	1	0	CHARCOAL	0	0	0	0	0	0	0		WOUNDS	128	67	62	98	35.8	20.6891	0	0	0	0	0	0	0	0	0	0	0	0	0	0	0	0	0	0	0	0	0	0	0	0	0
240362	2017-04-17	07:38:00	2	40	4	1	1	0	CHARCOAL	0	0	0	0	0	0	0		WOUND	114	76	102	98	35.9	25.3902	0	0	1	0	0	0	0	0	0	0	0	0	0	0	0	0	0	0	0	0	0	0	0	0	0
240365	2017-04-17	06:59:00	2	23	4	0	1	0	CHARCOAL	0	0	0	0	0	0	0		PHYSICAL AGGRESSION	119	77	67	98	35.6	18.5901	0	0	0	0	0	0	0	0	0	0	0	0	0	0	0	0	0	0	0	0	0	0	0	0	0
240374	2017-04-17	13:11:00	2	64	4	0	1	0	CHARCOAL	0	0	0	0	0	0	0		BACK PAIN	126	78	93	98	36.1	22.0241	0	0	0	0	0	0	0	0	0	0	0	0	0	0	0	0	0	0	0	0	0	0	0	0	0
240375	2017-04-17	10:30:00	2	30	4	1	1	0	CHARCOAL	0	0	0	0	0	0	0		LEFT KNEE PAIN	102	71	79	98	35.4	20.1348	0	0	0	0	0	0	0	0	0	0	0	0	0	0	0	0	0	1	0	0	0	0	0	0	0
240392	2017-04-17	15:00:00	2	29	4	0	1	0	CHARCOAL	0	0	0	0	0	0	0		LUMBAR SPINE PAIN	130	72	79	99	36.6	29.6886	0	0	0	0	0	0	0	0	0	0	0	0	0	0	0	0	0	0	0	0	0	0	0	0	0
240402	2017-04-18	20:49:00	2	23	4	0	1	0	CHARCOAL	0	0	0	0	1	0	0		MYALGIA	128	84	74	99	36.4	22.7734	0	0	0	0	0	0	0	0	0	0	0	0	0	0	0	0	0	0	0	0	0	0	0	0	0
240404	2017-04-18		2	29	4	0	1	0	CHARCOAL	0	0	0	0	1	0	0		HEADACHE	123	77	72	98	36.2	21.7312	0	0	0	0	0	0	0	0	0	0	0	1	0	0	0	0	0	0	0	0	0	0	0	0	0
240406	2017-04-20	18:10:00	2	28	4	0	1	0	CHARCOAL	0	0	0	0	1	0	0		KNEE PAIN	128	78	86	96	36.4	19.5714	0	0	0	0	0	0	0	0	0	0	0	0	0	0	0	0	0	1	0	0	0	0	0	0	0
240408	2017-04-19	18:10:00	2	52	4	0	1	0	FIREWOOD	0	1	0	0	1	0	0		ELBOW PAIN	131	88	94	99	37.2	23.8657	0	0	0	0	0	0	0	0	0	0	0	0	0	0	1	0	0	0	0	0	0	0	0	0	0
240419	2017-04-20	21:27:00	2	23	4	0	1	0	CHARCOAL	0	0	0	0	1	0	0		PAIN THROUGHOUT BODY	129	69	77	98	36.4	23.2335	0	0	0	0	0	0	0	0	0	0	0	0	0	0	0	0	0	0	0	0	0	0	0	0	0
240420	2017-04-20	20:50:00	2	23	4	0	1	0	CHARCOAL	0	0	0	0	1	0	0		RIGHT WRIST PAIN	140	86	64	98	35.8	20.7899	0	0	0	0	0	1	0	0	0	0	0	0	0	0	0	0	0	0	0	0	0	0	0	0	0
240424	2017-04-21	18:30:00	2	47	4	0	1	0	CHARCOAL	0	1	0	0	1	0	0		LEFT WRIST PAIN	107	72	100	99	37.6	19.9658	0	0	0	0	0	0	0	0	0	0	0	0	0	0	0	1	0	0	0	0	0	0	0	0	0
240426	2017-04-21	17:50:00	2	43	4	0	1	0	CHARCOAL	0	1	0	0	1	0	0		RIGHT KNEE PAIN	116	81	79	97	36.4	20.5078	0	0	0	1	0	0	0	0	0	0	0	0	0	0	0	0	0	0	0	0	0	0	0	0	0
240452	2017-04-23	10:15:00	2	28	4	0	1	0	CHARCOAL	0	1	0	0	1	0	0		SHOULDER PAIN	146	113	127	98	36.8	21.5243	0	0	0	0	0	0	0	0	0	0	0	0	1	0	0	0	0	0	0	0	0	0	0	0	0
240461	2017-04-23	14:35:00	2	36	4	0	1	0	CHARCOAL	0	0	0	0	1	0	0		EAR PAIN	114	72	55	99	36.7	21.271	0	0	0	0	0	0	0	0	0	0	0	1	0	0	0	0	0	0	0	0	0	0	0	0	0
240468	2017-04-22		2	25	4	0	1	0	CHARCOAL	0	1	0	0	1	0	0		LEG PAIN	110	67	86	96	37.8	23.6654	0	1	0	0	0	0	0	0	0	0	0	0	0	0	0	0	0	0	0	0	0	0	0	0	0
240470	2017-04-22	22:44:00	2	29	4	1	1	0	CHARCOAL	0	0	0	0	1	0	0		RIGHT ARM PAIN	137	91	108	98	37.7	28.6222	0	0	0	0	0	0	0	0	0	0	0	0	0	0	0	0	0	0	0	0	0	0	0	0	0
240473	2017-04-21	18:50:00	2	27	4	0	1	0	CHARCOAL	0	1	0	0	1	0	0		RIGHT WRIST PAIN	150	85	97	98	36	23.7141	0	0	0	0	0	1	0	0	0	0	0	0	0	0	0	0	0	0	0	0	0	0	0	0	0
240509	2017-04-25	16:25:00	2	27	4	0	1	0	FIREWOOD	0	1	0	0	1	0	0		RIGHT FOREARM PAIN	139	99	148	80	37.1	17.4917	0	0	0	0	0	0	0	1	0	0	0	0	0	0	0	0	0	0	0	0	0	0	0	0	0
240516	2017-04-25	13:58:00	2	36	4	1	1	0	CHARCOAL	0	0	0	0	1	0	0		LEFT SHOULDER PAIN	121	81	69	98	35.4	29.5703	0	0	0	0	0	0	0	0	0	0	0	0	1	0	0	0	0	0	0	0	0	0	0	0	0
240524	2017-04-27	07:30:00	2	31	4	0	1	0	CHARCOAL	0	0	1	0	1	0	0		LEFT KNEE PAIN	138	88	106	98	37	22.0719	0	0	0	0	0	0	0	0	0	0	0	0	0	0	0	0	0	1	0	0	0	0	0	0	0
240539	2017-04-30	06:24:00	2	51	4	0	1	0	CHARCOAL	0	1	0	0	1	0	0		HEADACHE	164	117	91	98	36.4	18.3545	0	0	0	0	0	0	0	0	0	0	0	0	0	0	0	0	0	0	0	0	0	0	0	0	0
240542	2017-04-29	08:45:00	2	20	4	0	1	1	CHARCOAL	0	0	0	0	1	0	0		RIGHT KNEE PAIN/LEFT FOOT PAIN	119	69	61	99	35.6	22.0181	0	0	0	0	0	0	0	0	0	0	0	0	0	0	0	0	0	0	0	0	0	0	0	0	0
240548	2017-04-29	16:50:00	2	50	4	0	1	0	FIREWOOD	0	0	0	0	1	0	0		RIGHT WRIST PAIN	135	87	81	99	37.5	23.1291	0	0	0	0	0	0	0	1	0	0	0	0	0	0	0	0	0	0	0	0	0	0	0	0	0
240549	2017-04-29	10:00:00	2	23	4	0	1	0	CHARCOAL	0	0	0	0	1	0	0		RIGHT WRIST PAIN	132	82	59	99	35.8	22.6326	0	0	0	0	0	1	0	0	0	0	0	0	0	0	0	0	0	0	0	0	0	0	0	0	0
240550	2017-04-29	11:00:00	2	22	4	0	1	0	FIREWOOD	0	0	0	0	1	0	0		WHOLE BODY PAIN	112	67	71	99	35.6	21.7159	0	0	0	0	0	0	0	0	0	0	0	0	0	0	0	0	0	0	0	0	0	0	0	0	0
240552	2017-04-29	10:00:00	2	29	4	0	1	0	CHARCOAL	0	1	0	0	0	0	0		RIGHT FOOT PAIN	150	77	104	98	37.2	18.6776	0	1	0	0	0	0	0	0	0	0	0	0	0	0	0	0	0	0	0	0	0	0	0	0	0
240553	2017-04-29	08:33:00	2	29	4	1	1	0	CHARCOAL	0	0	1	0	1	0	0		LUMBAR SPINE PAIN	127	64	129	99	36.7	19.3821	0	0	0	0	0	0	0	0	0	0	0	0	0	0	0	0	0	0	0	0	0	0	0	0	0
240556	2017-04-30	06:40:00	2	38	4	1	1	0	CHARCOAL	0	0	0	0	1	0	0		LEFT FOOT PAIN	142	119	97	92	36.9	38.6603	0	0	0	0	0	0	0	0	0	0	0	0	0	0	0	0	0	0	0	1	0	0	0	0	0
260002	2017-04-02	08:22:00	2	20	4	0	1	0	CHARCOAL	0	0	0	0	1	0	0		RIGHT KNEE PAIN	116	70	78	86	36.2	20.4491	0	0	0	1	0	0	0	0	0	0	0	0	0	0	0	0	0	0	0	0	0	0	0	0	0
260004	2017-04-02	09:33:00	2	21	4	1	1	1	CHARCOAL	0	0	0	0	1	0	0		RIGHT SHOULDER PAIN	106	67	66	95	37.4	23.2981	0	0	0	0	0	0	0	0	1	0	0	0	0	0	0	0	0	0	0	0	0	0	0	0	0
260010	2017-04-02	15:00:00	2	27	4	0	1	0	CHARCOAL	0	0	0	0	1	0	0		LEFT AND RIGHT ANKLE PAIN	139	83	76	98	36.7	17.5533	0	1	0	0	0	0	0	0	0	0	0	0	0	0	0	0	0	0	0	0	0	0	0	0	1
260011	2017-04-02	16:21:00	2	36	4	1	1	0	CHARCOAL	0	1	0	0	1	0	0		HEADACHE	105	60	72	98	36.5	20.3244	0	0	0	0	0	0	0	0	0	0	0	0	0	0	0	0	0	0	0	0	0	0	0	0	0
260012	2017-04-02		2	28	4	0	1	1	CHARCOAL	0	1	1	0	1	0	0		BURNING PAIN THROUGHOUT BODY	123	85	97	93	38.4	19.0618	0	0	0	0	0	0	0	0	0	1	1	0	1	0	1	1	0	0	0	0	1	1	0	0	0
260020	2017-04-02	16:05:00	2	23	4	0	1	0	CHARCOAL	0	0	0	0	1	0	0		RIGHT ARM WOUND	131	78	85	96	37.6	20.4618	0	0	0	0	0	0	0	0	0	0	0	0	0	0	0	0	0	0	0	0	0	0	0	0	0
260021	2017-04-02	17:20:00	2	50	4	0	1	1	CHARCOAL	1	0	0	0	1	0	0		RIGHT LEG PAIN	185	101	110	96	36.7	24.1672	0	0	0	0	1	0	0	0	0	0	0	0	0	0	0	0	0	0	0	0	0	0	0	0	0
260031	2017-04-02	19:40:00	2	47	4	0	1	1	FIREWOOD	0	0	0	0	1	0	0		LEFT EAR PAIN	149	99	106	84	36.7	26.5582	0	0	0	0	0	0	0	0	0	0	0	1	0	0	0	0	0	0	0	0	0	0	0	0	0
260045	2017-04-04	10:15:00	2	33	4	1	1	0	CHARCOAL	0	0	0	0	1	0	0		PHYSICAL AGGRESSION	145	86	81	98	36.7	29.4758	0	0	0	0	0	0	0	0	0	0	0	0	0	0	0	0	0	0	0	0	0	0	0	0	0
260047	2017-04-04	10:26:00	2	32	4	0	1	0	FIREWOOD	0	0	1	0	1	0	0		RIGHT ANKLE PAIN	151	103	91	99	36	22.4531	0	1	0	0	0	0	0	0	0	0	0	0	0	0	0	0	0	0	0	0	0	0	0	0	0
260052	2017-04-04	13:50:00	2	28	4	0	1	0	FIREWOOD	0	1	0	0	1	0	0		HEAD WOUND/CHEST PAIN	126	72	86	98	37.2	20.0995	0	0	0	0	0	0	0	0	0	0	0	0	0	0	0	0	0	0	0	0	0	0	0	0	0
260059	2017-04-04	17:20:00	2	36	4	1	1	0	CHARCOAL	0	0	0	0	1	0	0		LEFT KNEE PAIN	109	79	69	98	37.3	27.4253	0	0	0	0	0	0	0	0	0	0	0	0	0	0	0	0	0	1	0	0	0	0	0	0	0
260062	2017-04-04	11:43:00	2	25	4	0	1	0	FIREWOOD	0	0	0	0	1	0	0		THORACALGIA	121	73	67	99	36.9	20.7899	0	0	0	0	0	0	0	0	0	1	0	0	0	0	0	0	0	0	0	0	0	0	0	0	0
260083	2017-04-04	20:15:00	2	32	4	0	1	0	CHARCOAL	0	0	0	0	1	0	0		WOUND ON RIGHT LEG	167	108	119	98	36.6	19.5196	0	0	1	0	0	0	0	0	0	0	0	0	0	0	0	0	0	0	0	0	0	0	0	0	0
260084	2017-04-04	20:40:00	2	39	4	0	1	0	CHARCOAL	0	1	0	0	1	0	0		RIGHT FOREARM PAIN	102	91	86	96	36.2	21.2231	0	0	0	0	0	0	0	0	0	0	0	0	0	0	0	0	0	0	0	0	0	0	0	0	0
260122	2017-04-06		2	24	4	0	1	0	CHARCOAL	0	0	0	0	1	0	0		UNABLE TO MOVE UPPER LIMB	113	69	87	97	37.1		0	0	1	0	0	0	0	0	0	0	0	0	0	0	0	0	0	0	0	0	0	0	0	0	0
260126	2017-04-06	19:50:00	2	46	4	0	1	0	CHARCOAL+FIREWOOD	0	0	0	0	1	0	0		ALLERGY	137	84	64	98	35.1	25.5811	0	0	0	0	0	0	0	0	0	0	0	0	0	0	0	0	0	0	0	0	0	0	0	0	0
260128	2017-04-06	14:10:00	2	22	4	0	1	0	CHARCOAL+GAS	0	0	0	0	0	0	0		SHOULDER PAIN	125	82	68	99	37.6	21.1773	0	0	0	0	0	0	0	1	0	0	0	0	0	0	0	0	0	0	0	0	0	0	0	0	0
260131	2017-04-06	10:27:00	2	23	4	1	1	0	CHARCOAL	0	0	0	0	1	0	0		AGGRESSION	101	69	69	94	39.1	20.3428	0	0	0	0	0	0	0	0	0	0	0	0	0	1	0	0	0	0	0	0	0	0	0	0	0
260142	2017-04-06	16:00:00	2	25	4	1	1	0	CHARCOAL	0	0	1	0	1	0	0		HEADACHE	112	71	91	98	37.7	22.8047	0	0	0	0	0	0	0	0	0	0	0	1	0	0	0	0	0	0	0	0	0	0	0	0	0
260150	2017-04-06	15:29:00	2	33	4	0	1	0	CHARCOAL	1	0	0	0	1	0	0		CHEST PAIN	157	107	93	97	38.3	21.0035	0	0	0	0	0	0	0	0	0	1	0	0	0	0	0	0	0	0	0	0	0	0	0	0	0
260152	2017-04-08	09:05:00	2	33	4	1	1	0	GAS+CHARCOAL	0	0	0	0	1	0	0		RIGHT ANKLE PAIN	123	86	109	95	37.1	31.0951	0	0	0	1	0	0	0	0	0	0	0	0	0	0	0	0	0	0	0	0	0	0	0	0	0
260157	2017-04-08	16:05:00	2	22	4	1	1	0	CHARCOAL	0	0	0	0	1	0	0		FALL AFTER ASSAULT	95	58	81	99	36.9	17.9297	0	0	0	0	0	0	0	0	0	0	0	0	0	0	0	0	0	1	0	0	0	0	0	0	0
260163	2017-04-08	18:15:00	2	36	4	0	1	0	CHARCOAL	0	0	0	0	0	0	0		RUN OVER IN TRAFFIC ACCIDENT	131	85	68	98	36.8	21.3786	0	1	0	0	0	0	0	0	0	0	0	0	0	0	0	0	0	0	0	0	0	0	0	0	1
260182	2017-04-08	22:49:00	2	29	4	1	1	0	CHARCOAL	0	0	0	0	1	0	0		EYELID SWELLING	133	89	82	99	35.5	27.1026	0	0	0	0	0	0	0	0	0	0	0	0	0	0	0	0	0	0	0	0	0	0	0	0	0
260184	2017-04-08	21:06:00	2	24	4	1	1	0	CHARCOAL	0	0	1	0	1	0	0		BODY PAIN/PHYSICAL AGRESSION	105	73	95	99	36.6	20.7311	0	0	0	0	0	0	0	0	0	0	0	0	0	0	0	0	0	0	0	0	0	0	0	0	0
260210	2017-04-09	19:26:00	2	33	4	0	1	0	CHARCOAL	1	0	0	0	1	0	0		NASAL TRAUMA	118	92	97	98	35.9	19.5418	0	0	0	0	0	0	0	0	0	0	0	1	0	0	0	0	0	0	0	0	0	0	0	0	0
260211	2017-04-09	12:06:00	2	33	4	0	1	0	CHARCOAL+ELECTRICITY	0	0	0	0	0	0	0		SWOLLEN NOSE/HEADACHE	117	77	75	98	36	19.7578	0	0	0	0	0	0	0	0	0	0	0	1	0	0	0	0	0	0	0	0	0	0	0	0	0
260214	2017-04-09	13:38:00	2	27	4	0	1	0	CHARCOAL	0	0	0	0	1	0	0		PAIN IN THORACIC REGION	131	78	73	99	36.3	20.9325	0	0	0	0	0	0	0	0	0	1	0	0	0	0	0	0	0	0	0	0	0	0	0	0	0
260215	2017-04-09	08:13:00	2	23	4	0	1	0	CHARCOAL	0	0	0	0	1	0	0		HEAD WOUND AND SWELLING	147	85	66	99	36.6	24.4418	0	0	0	0	0	0	0	0	0	0	0	0	0	0	0	0	0	0	0	0	0	0	0	0	0
260220	2017-04-06	15:18:00	2	42	4	0	1	0	CHARCOAL	1	0	0	0	1	0	0		LEFT KNEE WOUND AND SWELLING	122	70	69	98	39	18.0697	0	0	0	1	0	0	0	0	0	0	0	0	0	0	0	0	0	0	0	0	0	0	0	0	0
260223	2017-04-06	15:42:00	2	76	4	0	1	0	CHARCOAL	0	0	0	0	0	0	0			128	69	60	99	38.1	19.8413	0	0	0	0	0	0	0	0	0	0	0	0	0	0	0	0	0	0	0	0	0	0	0	0	0
260228	2017-04-08	09:15:00	2	28	4	0	1	0	CHARCOAL	0	0	0	0	1	0	0			120	80	100	99	36.8	21.1096	0	0	1	0	0	0	0	0	0	0	0	0	0	0	0	0	0	0	0	0	0	0	0	0	0
260231	2017-04-09	09:06:00	2	23	4	0	1	0	CHARCOAL	0	0	0	0	0	0	0		FACE WOUND FROM PHYSICAL FIGHT	125	68	102	98	36.4	19.4671	0	0	0	0	0	0	0	0	0	0	0	1	0	0	0	0	0	0	0	0	0	0	0	0	0
260236	2017-04-09	15:29:00	2	22	4	0	1	0	CHARCOAL	0	0	0	0	1	0	0		LEFT FOOT SWELLING AFTER FALL	143	73	83	97	36.9	23.0796	0	0	0	0	0	0	0	0	0	0	0	0	0	0	0	0	0	0	0	1	0	0	0	0	0
260239	2017-04-09	07:51:00	2	27	4	0	1	0	CHARCOAL	0	0	0	0	1	0	0		BACK WOUND	118	85	87	97	36.9	25.0173	0	0	0	0	0	0	0	0	0	0	0	0	0	0	0	0	0	0	0	0	0	0	0	0	0
260247	2017-04-12	09:00:00	2	42	4	0	1	0	CHARCOAL+ELECTRIC	0	0	0	0	1	0	0		SHOULDER PAIN	115	74	86	98	36.8	18.8942	0	0	0	0	0	0	0	0	1	0	0	0	0	0	0	0	0	0	0	0	0	0	0	0	0
260263	2017-04-12	13:58:00	2	20	4	0	1	0	CHARCOAL	0	0	0	0	0	0	0		THUMB PAIN	121	76	57	99	36.6	20.7422	0	0	0	0	0	1	0	0	0	0	0	0	0	0	0	0	0	0	0	0	0	0	0	0	0
260265	2017-04-12	12:00:00	2	49	4	0	1	0	FIREWOOD	0	1	0	0	1	0	0		LEFT SHOULDER PAIN	127	89	76	99	36.9	19.3951	0	0	0	0	0	0	0	0	0	0	0	0	1	0	0	0	0	0	0	0	0	0	0	0	0
260276	2017-04-12	18:15:00	2	47	4	1	1	0	CHARCOAL+FIREWOOD	0	0	0	0	1	0	0		CHEST PAIN	138	88	67	99	36.9	30.8205	0	0	0	0	0	0	0	0	0	1	0	0	0	0	0	0	0	0	0	0	0	0	0	0	0
260295	2017-04-13	22:55:00	2	26	4	0	1	0	CHARCOAL	0	0	0	0	1	0	0		HAND WOUND	139	90	110	97	35.6	24.2215	0	0	0	0	0	0	0	0	0	0	0	0	0	0	0	1	0	0	0	0	0	0	0	0	0
260300	2017-04-14	06:15:00	2	44	4	0	1	0	CHARCOAL	0	0	0	0	1	0	0		FEVER/PAIN RIGHT FOOT AND ANKLE	117	71	97	96	38.3	29.9041	0	1	0	0	0	0	0	0	0	0	0	0	0	0	0	0	0	0	0	0	0	0	0	0	0
260306	2017-04-10	09:42:00	2	40	4	1	1	0	CHARCOAL	1	0	0	0	0	0	0		PAIN IN SECOND LEFT FINGER	163	105	66	99	36.5	24.1389	0	0	0	0	0	0	0	0	0	0	0	0	0	0	0	1	0	0	0	0	0	0	0	0	0
260316	2017-04-10	15:17:00	2	20	4	0	1	0	CHARCOAL	0	0	0	0	0	0	0		SPINE PAIN	127	81	68	97	36.9	20.0414	0	0	0	0	0	0	0	0	0	0	0	0	0	0	0	0	0	0	0	0	0	0	0	0	0
260334	2017-04-15	09:00:00	2	31	4	0	1	0	CHARCOAL	0	0	0	0	1	0	0		HEADACHE/LEG PAIN	114	74	75	98	37.4	19.798	0	0	0	0	0	0	0	0	0	0	0	0	0	0	0	0	0	0	0	0	0	0	0	0	0
260336	2017-04-15	10:45:00	2	43	4	0	1	0	CHARCOAL	0	0	0	0	1	0	0		CHEST PAIN	116	74	79	98	37	23.3242	0	0	0	0	0	0	0	0	0	1	0	0	0	0	0	0	0	0	0	0	0	0	0	0	0
260363	2017-04-16	11:00:00	2	60	4	0	1	1	CHARCOAL	0	1	0	0	0	0	0		PHYSICAL AGGRESSION	124	84	68	91	36.5	24.281	0	0	0	0	0	0	0	0	0	0	0	0	0	0	0	0	0	0	0	0	0	0	0	0	0
260381	2017-04-16	22:10:00	2	30	4	0	1	0	CHARCOAL	0	0	0	0	0	0	0		TRAFFIC ACCIDENT	136	90	92	96	36.1	23.939	0	0	0	0	0	0	0	0	0	0	0	0	0	0	0	0	0	0	0	0	0	0	0	0	0
260383	2017-04-17	04:57:00	2	36	4	0	1	1	CHARCOAL	0	0	0	0	1	0	0		INCISED WOUND ON SCALP	134	88	109	98	36.1	24.0597	0	0	0	0	0	0	0	0	0	0	0	1	0	0	0	0	0	0	0	0	0	0	0	0	0
260384	2017-04-17	21:21:00	2	31	4	0	1	1		0	0	0	0	1	0	0		LEFT BRUISED EYE	122	82	105	98	36.4	26.2626	0	0	0	0	0	0	0	0	0	0	0	0	0	0	0	0	0	0	0	0	0	0	0	0	0
260388	2017-04-16	23:04:00	2	20	4	1	1	0		0	1	0	1	1	0	0		INCISED WOUND LEFT HIP	138	103	96	97	34.1	21.044	0	0	0	0	0	0	0	0	0	0	0	0	0	0	0	0	1	0	0	0	0	0	0	0	0
260398	2017-04-14	13:50:00	2	26	4	0	1	0	CHARCOAL	1	0	0	0	1	0	0		LEFT EAR PAIN	128	68	89	98	36.4	21.7779	0	0	0	0	0	0	0	0	0	0	0	1	0	0	0	0	0	0	0	0	0	0	0	0	0
260405	2017-04-14	13:00:00	2	21	4	1	1	0	CHARCOAL	1	0	0	0	1	0	0		RIGHT WRIST PAIN	114	74	71	98	36.7	26.8887	0	0	0	0	0	1	0	0	0	0	0	0	0	0	0	0	0	0	0	0	0	0	0	0	0
260406	2017-04-14	12:20:00	2	73	4	0	1	0	CHARCOAL	0	1	0	0	1	0	0		HEADACHE	137	65	85	98	36.4	16.593	0	0	0	0	0	0	0	0	0	0	0	1	0	0	0	0	0	0	0	0	0	0	0	0	0
260418	2017-04-19	10:54:00	2	45	4	0	1	0	CHARCOAL	1	0	0	1	1	0	0		PAIN THROUGHOUT BODY	122	83	86	99	36.7	19.1478	0	0	0	0	0	0	0	0	0	0	0	0	0	0	0	0	0	0	0	0	0	0	0	0	0
260430	2017-04-19	16:17:00	2	58	4	1	1	0		0	0	0	0	1	0	0		WRIST PAIN	136	82	69	98	36	22.8235	0	0	0	0	0	0	0	1	0	0	0	0	0	0	0	0	0	0	0	0	0	0	0	0	0
260438	2017-04-14	12:10:00	2	50	4	0	1	0	CHARCOAL	0	0	0	0	1	0	0		PAIN IN THE BIG TOE RIGHT	127	73	68	99	35.4	33.4252	0	1	0	0	0	0	0	0	0	0	0	0	0	0	0	0	0	0	0	0	0	0	0	0	0
260444	2017-04-14	11:10:00	2	49	4	0	1	0	CHARCOAL	1	0	0	0	1	0	0		LEFT EAR PAIN	162	80	90	95	35.4	19.6417	0	0	0	0	0	0	0	0	0	0	0	1	0	0	0	0	0	0	0	0	0	0	0	0	0
260445	2017-04-15	04:50:00	2	24	4	1	1	0	CHARCOAL	0	0	0	0	1	0	0		PAIN IN THE RIGHT HAND	120	70	102	95	35.4	27.2533	0	0	0	0	0	1	0	0	0	0	0	0	0	0	0	0	0	0	0	0	0	0	0	0	0
260446	2017-04-15	22:00:00	2	65	4	1	1	0	CHARCOAL	0	0	0	0	1	0	0		HEADACHE	151	97	85	97	36.5	26.1357	0	0	0	0	0	0	0	0	0	0	0	1	0	0	0	0	0	0	0	0	0	0	0	0	0
260477	2017-04-20	16:00:00	2	26	4	0	1	0	CHARCOAL	0	1	0	0	1	0	0		LEFT EYE PAIN	127	77	84	98	36.8	19.7975	0	0	0	0	0	0	0	0	0	0	0	1	0	0	0	0	0	0	0	0	0	0	0	0	0
260478	2017-04-20	14:23:00	2	24	4	1	1	0	CHARCOAL	0	0	0	0	1	0	0		RIGHT ELBOW PAIN	107	78	100	96	34.8	23.2735	0	0	0	0	0	0	0	0	0	0	0	0	0	0	1	0	0	0	0	0	0	0	0	0	0
260480	2017-04-20	16:27:00	2	20	4	0	1	0	CHARCOAL	0	0	0	0	0	0	0		RIGHT KNEE PAIN	122	60	47	98	36.1	23.0518	0	0	0	1	0	0	0	0	0	0	0	0	0	0	0	0	0	0	0	0	0	0	0	0	0
260503	2017-04-18	08:36:00	2	25	4	0	1	0	CHARCOAL	0	1	0	0	1	0	0		RIGHT ANKLE PAIN	127	77	68	98	36.4	23.6719	0	1	0	0	0	0	0	0	0	0	0	0	0	0	0	0	0	0	0	0	0	0	0	0	0
260509	2017-04-18	11:51:00	2	60	4	0	1	0	CHARCOAL	0	0	0	0	1	0	0		INFECTED WOUND POST RIGHT LEG AMPUTATION	126	89	87	95	36.4	30.4705	0	0	0	0	0	0	0	0	0	0	0	0	0	0	0	0	0	0	0	0	0	0	0	0	0
260510	2017-04-18	12:57:00	2	60	4	0	1	0	CHARCOAL+GAS	0	0	0	0	1	0	0		INFECTED WOUND POST RIGHT LEG AMPUTATION	126	89	87	95	36.4		0	0	0	0	0	0	0	0	0	0	0	0	0	0	0	0	0	0	0	0	0	0	0	0	0
260512	2017-04-18	14:01:00	2	46	4	1	1	0	FIREWOOD	1	0	0	0	1	0	0		CHEST PAIN POST TRAUMA	164	86	109	95	36	25.2237	0	0	0	0	0	0	0	0	0	1	0	0	0	0	0	0	0	0	0	0	0	0	0	0	0
260513	2017-04-18	14:01:00	2	46	4	1	1	0	FIREWOOD	1	0	1	0	1	0	0		CHEST PAIN POST TRAUMA	164	86	109	95	36	21.0614	0	0	0	0	0	0	0	0	0	1	0	0	0	0	0	0	0	0	0	0	0	0	0	0	0
260520	2017-04-18	14:05:00	2	76	4	0	1	0	CHARCOAL	1	0	0	0	1	0	0		SHOULDER/ELBOW/WRIST PAIN	179	109	117	98	36.6	28.5714	0	0	0	0	0	0	0	0	1	0	0	0	0	0	0	0	0	0	0	0	0	0	0	0	0
260532	2017-04-19	22:00:00	2	26	4	0	1	0	CHARCOAL	0	1	0	0	1	0	0		HEAD WOUND	116	84	74	98	37.4	19.8295	0	0	0	0	0	0	0	0	0	0	0	0	0	0	0	0	0	0	0	0	0	0	0	0	0
260533	2017-04-19	20:15:00	2	30	4	1	1	0	CHARCOAL	0	0	0	0	1	0	0		ABRASIONS	118	79	139	98	36.8	26.2891	0	0	0	0	0	0	0	0	0	0	0	0	0	0	0	0	0	0	1	0	0	0	0	0	0
260545	2017-04-24	12:30:00	2	37	4	0	1	0	CHARCOAL	0	0	0	0	1	0	0		RIGHT WRIST PAIN	151	94	80	89	37.2	24.6417	0	0	0	0	0	0	0	1	0	0	0	0	0	0	0	0	0	0	0	0	0	0	0	0	0
260546	2017-04-24	11:59:00	2	24	4	0	1	0	CHARCOAL	0	1	0	0	0	0	0		CUT ON MIDDLE FINGER OF RIGHT HAND	119	66	75	96	37.2	21.4498	0	0	0	0	0	1	0	0	0	0	0	0	0	0	0	0	0	0	0	0	0	0	0	0	0
260556	2017-04-24	15:10:00	2	43	4	1	1	0	CHARCOAL	0	1	0	0	0	0	0		LEFT KNEE PAIN	145	93	77	74	35.6	23.8445	0	0	1	0	0	0	0	0	0	0	0	0	0	0	0	0	0	0	0	0	0	0	0	0	0
260558	2017-04-24	14:50:00	2	20	4	1	1	0	CHARCOAL	1	0	0	0	1	0	0		JOINT PAIN/HEADACHE	145	69	94	98	36.7	23.2988	0	0	0	0	0	0	0	0	0	0	0	0	0	0	0	0	0	0	0	0	0	0	0	0	0
260563	2017-04-24	14:31:00	2	29	4	0	1	0	CHARCOAL	0	1	0	0	1	0	0		RIGHT SHOULDER PAIN	124	84	57	60	37.1	27.854	0	0	0	0	0	0	0	0	1	0	0	0	0	0	0	0	0	0	0	0	0	0	0	0	0
260571	2017-04-24	16:00:00	2	28	4	0	1	0	CHARCOAL	0	0	0	0	1	0	0		LEFT ELBOW PAIN	110	74	78	99	37.2	23.2735	0	0	0	0	0	0	1	0	0	0	0	0	0	0	0	0	0	0	0	0	0	0	0	0	0
260576	2017-04-24	23:30:00	2	31	4	0	1	0	CHARCOAL	0	0	1	0	0	0	0		HEAD WOUND	136	79	83	96	37.3	24.4726	0	0	0	0	0	0	0	0	0	0	0	1	0	0	0	0	0	0	0	0	0	0	0	0	0
260585	2017-04-26	06:50:00	2	32	4	1	1	0	CHARCOAL	0	0	0	0	0	0	0		LEFT ARM PAIN POST FALL	174	112	81	99	36.8	23.5111	0	0	0	0	0	0	0	0	0	0	0	0	0	1	0	0	0	0	0	0	0	0	0	0	0
260586	2017-04-25	21:30:00	2	39	4	0	1	0	CHARCOAL	0	0	0	0	0	0	0		ARM PAIN/WEAKNESS	120	96	82	98	36.7	18.5813	0	0	0	0	0	0	0	0	0	0	0	0	0	1	0	0	0	0	0	0	0	0	0	0	0
260617	2017-04-28	10:45:00	2	44	4	0	1	0	CHARCOAL+FIREWOOD	0	0	0	0	1	0	0		LEFT KNEE PAIN	134	86	91	98	36.4	22.6971	0	0	0	0	0	0	0	0	0	0	0	0	1	0	0	0	0	0	0	0	0	0	0	0	0
260621	2017-04-28	10:00:00	2	28	4	0	1	0	FIREWOOD	0	0	0	0	1	0	0		BODY ACHE/DIFFICULTY WALKING	145	93	76	99	36.8	21.7969	0	0	0	1	0	0	0	0	0	0	0	0	0	0	0	0	0	0	0	0	0	0	0	0	0
260622	2017-04-28	11:20:00	2	37	4	0	1	0	CHARCOAL+FIREWOOD	0	1	0	0	0	0	0		RIGHT FOOT PAIN	110	75	75	99	36.1	20.2924	0	1	0	0	0	0	0	0	0	0	0	0	0	0	0	0	0	0	0	0	0	0	0	0	0
260623	2017-04-28	13:30:00	2	21	4	0	1	0	CHARCOAL	0	0	0	0	1	0	0		RIGHT KNEE PAIN	141	87	60	94	36	22.5391	0	1	0	1	0	0	0	0	0	0	0	0	0	0	0	0	0	0	0	0	0	0	0	0	0
260626	2017-04-28	12:00:00	2	25	4	0	1	0	CHARCOAL	0	0	0	0	1	0	0		LEFT FOOT WOUND	103	76	115	98	36.3	19.6604	0	0	0	0	0	0	0	0	0	0	0	0	0	0	0	0	1	0	0	0	0	0	0	0	0
260639	2017-04-27	12:15:00	2	41	4	1	1	0	CHARCOAL	0	0	0	0	1	0	0		SHOULDER PAIN	141	86	106	99	37.1	23.6832	0	0	0	0	0	0	0	0	0	0	0	0	1	0	0	0	0	0	0	0	0	0	0	0	0
260646	2017-04-28	21:10:00	2	30	4	1	1	0	CHARCOAL	1	0	0	0	1	0	0		BOWEL PAIN	115	85	94	98	37.2	21.2585	0	0	0	0	0	0	0	0	0	0	0	0	0	0	0	0	0	0	0	0	1	0	0	0	0
260652	2017-04-28	23:44:00	2	45	4	0	1	0	CHARCOAL	0	1	0	0	1	0	0		RIGHT FOOT PAIN	130	80	76	98	37.2	23.5863	0	0	0	0	0	0	0	0	0	0	0	0	0	0	0	0	0	0	0	1	0	0	0	0	0
260655	2017-04-22	19:00:00	2	27	4	0	1	0	CHARCOAL	0	0	0	0	0	0	0		HAND WOUND	126	83	88	97	35.7	21.2803	0	0	0	0	0	0	0	0	0	0	0	0	0	0	0	1	0	0	0	0	0	0	0	0	0
260656	2017-04-22	10:00:00	2	31	4	0	1	0	CHARCOAL	0	0	0	0	0	0	0		BODY PAIN	118	77	78	99	36.9	21.6731	0	0	0	0	0	0	0	1	0	0	0	0	0	0	0	0	0	0	0	0	0	0	0	0	0
260664	2017-04-22	10:00:00	2	34	4	0	1	0	CHARCOAL	0	0	0	0	0	0	0		ARM PAIN	115	69	67	96	36.8	22.5336	0	0	0	0	0	0	0	1	0	0	0	0	0	0	0	0	0	0	0	0	0	0	0	0	0
260665	2017-04-22	10:00:00	2	29	4	1	1	0	CHARCOAL	0	0	0	0	0	0	0		HEAD PAIN/WOUND	122	101	95	95	35.7	38.5815	0	0	0	0	0	0	0	0	0	0	0	1	0	0	0	0	0	0	0	0	0	0	0	0	0
260671	2017-04-22	14:00:00	2	39	4	1	1	0	CHARCOAL	0	0	0	0	0	0	0		BODY PAIN/TOOTH PAIN	119	83	100	99	36.5	27.1875	0	0	0	0	0	0	0	0	0	0	0	0	0	0	0	0	0	0	0	0	0	0	0	0	0
260674	2017-04-22	18:00:00	2	24	4	1	1	0	CHARCOAL	0	1	0	0	1	0	0		LEFT LEG PAIN	106	65	98	99	36.5	22.1317	0	0	0	0	0	0	0	0	0	0	0	0	0	1	0	0	0	0	0	0	0	0	0	0	0
260680	2017-04-23	19:45:00	2	38	4	0	1	1	CHARCOAL	0	0	0	0	1	0	0		PAIN THROUGHOUT BODY	112	76	83	97	36.2	18.6324	0	0	0	0	0	0	0	0	0	0	0	0	0	0	0	0	0	0	0	0	0	0	0	0	0
260691	2017-04-26	14:18:00	2	21	4	0	1	0	CHARCOAL	0	0	0	0	0	0	0		WOUND	126	80	81	98	35.6	23.6838	0	0	0	0	0	0	0	0	0	0	0	0	0	0	0	0	0	0	1	0	0	0	0	0	0
260693	2017-04-26	12:22:00	2	20	4	1	1	0	CHARCOAL	0	0	0	0	0	0	0		THROAT PAIN	158	106	127	97	37.4	22.7595	0	0	0	0	0	0	0	0	0	0	0	0	0	0	0	0	0	0	0	0	0	0	0	0	0
260708	2017-04-26	12:33:00	2	20	4	0	1	0	CHARCOAL	0	0	0	0	0	0	0		PRURITUS	123	79	86	98	35.7	20.9734	0	0	0	0	0	0	0	0	0	0	0	0	0	0	0	0	0	0	0	0	0	0	0	0	0
91825	2017-10-01	10:58:00	2	24	4	0	1		CHARCOAL				0	0	0	0		HEAD SWELLING	132	73	87		37.2	22.9817	0	0	0	0	0	0	0	0	0	0	0	0	0	0	0	0	0	0	0	0	0	0	0	0	0
918182	2017-10-16	23:01:00	2	29	4	0	1		CHARCOAL				0	1	0	0		RIB PAIN	120	67	71	99	36.1	23.1652	0	0	0	0	0	0	0	0	0	1	0	0	0	0	0	0	0	0	0	0	0	0	0	0	0
918223	2017-10-01	21:27:00	2	23	4	0	1		FIREWOOD				0	0	0	0		RIGHT KNEE PAIN	106	53	77		36	25.3411	0	0	0	0	0	0	0	0	0	0	0	0	0	0	0	0	0	1	0	0	0	0	0	0	0
918241	2017-10-02	15:52:00	2	28	4	1	1	0	CHARCOAL+GAS	1	0	0	0	0	0	0		RIGHT LITTLE FINGER WOUND	100	72	83	99	36.2	25.3336	0	0	0	0	0	1	0	0	0	0	0	0	0	0	0	0	0	0	0	0	0	0	0	0	0
918249	2017-10-03	08:32:00	2	28	4	0	1	0	CHARCOAL	0	0	0	0	1	0	0		LEFT SHOULDER PAIN	143	99	89	98	36.2	27.6095	0	0	0	0	0	0	0	0	0	0	0	0	1	0	0	0	0	0	0	0	0	0	0	0	0
918259	2017-10-03	12:44:00	2	33	4	0	1	0	CHARCOAL	0	1	0	0	0	0	0		NOSE PAIN AND SWELLING	130	82	96	96	36.7	20.5457	0	0	0	0	0	0	0	0	0	0	0	1	0	0	0	0	0	0	0	0	0	0	0	0	0
918260	2017-10-03	13:42:00	2	20	4	1	1	0	CHARCOAL	0	0	0	0	0	0	0		PAIN AND BLEEDING NOSE	122	87	110	96	36.3	24.093	0	0	0	0	0	0	0	0	0	1	0	0	0	0	0	0	0	0	0	0	0	0	0	0	0
918262	2017-10-03	14:13:00	2	22	4	1	1		CHARCOAL				0	1	0	0		WRIST PAIN AND TWISTED	120	70	110	91	36.5	23.0469	0	0	0	0	0	1	0	0	0	0	0	0	0	0	0	0	0	0	0	0	0	0	0	0	0
918263	2017-10-03	15:31:00	2	42	4	0	1	0	CHARCOAL	0	1	0	1	0	0	0		NECK PAIN/BLEEDING	131	81	89	96	36.2	20.3223	0	0	0	0	0	0	0	0	0	0	0	1	0	0	0	0	0	0	0	0	0	0	0	0	0
918287	2017-10-03	21:27:00	2	30	4	1	1		CHARCOAL				0	0	0	0		RIGHT EAR PAIN	130	92	89	98	37	27.7289	0	0	0	0	0	0	0	0	0	0	0	1	0	0	0	0	0	0	0	0	0	0	0	0	0
918290	2017-10-03	23:16:00	2	27	4	1	1		CHARCOAL				0	0	0	0		WHOLE BODY PAIN	131	85	120	99	37.4	20.5178	0	0	0	0	0	0	0	0	0	0	0	0	0	0	0	1	1	0	0	1	0	0	0	0	0
918292	2017-10-04	07:00:00	2	31	4	0	1	0	CHARCOAL	0	0	0	0	0	0	0		LEFT EAR PAIN	133	87	71	75	35.9	21.0836	0	0	0	0	0	0	0	0	0	0	0	1	0	0	0	0	0	0	0	0	0	0	0	0	0
918298	2017-10-04	10:24:00	2	27	4	0	1		CHARCOAL				0	0	0	0		THUMB PAIN	131	76	99	96	35.6	21.103	0	0	0	0	0	1	0	0	0	0	0	0	0	0	0	0	0	0	0	0	0	0	0	0	0
9182121	2017-10-04	21:15:00	2	24	4	0	1		CHARCOAL				0	0	0	0		RIGHT LEG PAIN/RIGHT KNEE WOUND	127	84	111	99	36.2	21.6406	0	1	0	1	0	0	0	0	0	0	0	0	0	0	0	0	0	0	0	0	0	0	0	0	0
9182122	2017-10-04	21:58:00	2	39	4	0	1		CHARCOAL+FIREWOOD				0	0	0	0		RIGHT ARM PAIN/MULTIPLE WOUNDS	122	83	126	98	36.1	30.5158	0	0	0	0	0	1	0	0	0	0	0	0	0	0	0	1	0	0	0	0	0	0	0	0	0
9182152	2017-10-05	20:33:00	2	31	4	0	1		CHARCOAL				0	1	0	0		PHYSICAL AGGRESSION	135	70	115	99	37.7	26.6631	0	0	0	0	0	0	0	0	0	0	0	1	0	0	0	0	0	0	0	0	0	0	0	0	0
9182153	2017-10-05	21:14:00	2	31	4	0	1		CHARCOAL				0	1	0	0		PHYSICAL AGGRESSION	134	76	79	98	36.8	22.0581	0	0	0	0	0	0	0	0	0	0	0	1	0	0	0	0	0	0	0	0	0	0	0	0	0
9182154	2017-10-06	05:57:00	2	40	4	0	1	0	CHARCOAL	1	0	0	0	0	0	0		FALL	130	99	76	98	36.2	26.2574	0	0	0	0	0	0	0	0	0	0	0	0	0	0	0	1	0	0	0	0	0	0	0	0	0
9182160	2017-10-06	08:12:00	2	40	4	0	1	1	CHARCOAL	0	0	1	1	0	0	0		FOREIGN BODY IN RIGHT EAR	110	76	59	98	36.2	22.2222	0	0	0	0	0	0	0	0	0	0	0	1	0	0	0	0	0	0	0	0	0	0	0	0	0
9182167	2017-10-06	08:14:00	2	75	4	0	1	0	CHARCOAL	1	0	0	0	1	0	0		LEFT KNEE PAIN	150	89	77	99	32.5	29.2388	0	0	0	0	0	0	0	0	0	0	0	0	0	0	1	0	0	0	0	0	0	0	0	0	0
9182169	2017-10-06	10:27:00	2	49	4	1	1		CHARCOAL				0	1	0	0		LEFT FOOT PAIN	140	81	75	99	36.2	33.3632	0	0	0	0	0	0	0	0	0	0	0	0	0	0	0	0	0	0	0	1	0	0	0	0	0
9182170	2017-10-06	08:53:00	2	22	4	1	1	0	CHARCOAL	1	0	0	0	1	0	0		RIGHT SHOULDER PAIN	119	70	56	99	36.6	35.539	0	0	0	0	0	0	0	0	1	0	0	0	0	0	0	0	0	0	0	0	0	0	0	0	0
9182172	2017-10-06	08:30:00	2	41	4	0	1		CHARCOAL				0	0	0	0		RIB PAIN	137	88	82	99	36.8	19.6852	0	0	0	0	0	0	0	0	0	1	0	0	0	0	0	0	0	0	0	0	0	0	0	0	0
9182174	2017-10-06	07:55:00	2	40	4	1	1		FIREWOOD				0	0	0	0		ARM PAIN AND SWELLING	139	100	88	98	37.2	28.2031	0	0	0	0	0	1	0	0	0	0	0	0	0	0	0	1	0	0	0	0	0	0	0	0	0
9182208	2017-10-07	17:08:00	2	34	4	0	1		CHARCOAL				0	1	0	0		LEFT EYE PAIN POST BLOW	124	88	90	98	36.6	21.4453	0	0	0	0	0	0	0	0	0	0	0	1	0	0	0	0	0	0	0	0	0	0	0	0	0
9182212	2017-10-07	09:32:00	2	20	4	0	1	0	CHARCOAL	1	0	0	0	0	0	0		RIGHT ARM PAIN	128	84	80	99	36.9	21.0667	1	0	0	0	0	0	0	0	0	0	0	0	1	0	1	1	0	0	0	0	0	0	0	0	0
9182217	2017-10-07	09:16:00	2	52	4	0	1		CHARCOAL				0	1	0	0		BACK PAIN	140	94	79	98	36.6	28.7455	0	0	0	0	0	0	0	0	0	0	0	0	0	0	0	0	0	0	0	0	0	0	0	0	0
9182241	2017-10-08	11:41:00	2	37	4	0	1		CHARCOAL				0	0	0	0		PHYSICAL AGGRESSION	100	63	78	98	34.1	33.7306	0	0	0	0	0	0	0	0	0	0	0	1	0	0	0	0	0	0	0	0	0	0	0	0	0
9182248	2017-10-08	15:18:00	2	21	4	1	1		CHARCOAL				0	0	0	0		AGGRESSION	120	80	80	98	36.6	23.7332	0	0	0	0	0	0	0	0	0	0	1	0	0	0	0	0	0	0	0	0	0	0	0	0	0
9182256	2017-10-08	20:54:00	2	75	4	0	1	0	CHARCOAL	0	0	0	0	1	0	0		HEAD INCISED WOUND	113	74	64	97	36.2	16.9796	0	0	0	0	0	0	0	0	0	0	0	1	0	0	0	0	0	0	0	0	0	0	0	0	0
9182265	2017-10-09	07:33:00	2	50	4	0	1		CHARCOAL				0	0	0	0		CHEST PAIN	112	83	99	98	36.3	20.6574	0	0	0	0	0	0	0	0	0	1	0	0	0	0	0	0	0	0	0	0	0	0	0	0	0
9182274	2017-10-09	09:44:00	2	40	4	1	1		FIREWOOD				0	0	0	0		LEFT WRIST AND HAND SWELLING	183	115	100	98	37.1	24.6222	0	0	0	0	0	0	0	0	0	0	0	0	0	0	0	1	0	0	0	0	0	0	0	0	0
9182300	2017-10-09	21:41:00	2	24	4	1	1	0	CHARCOAL	0	1	0	0	0	0	0		ALTERED BEHAVIOUR	132	80	120	98	37.2	24.5404	0	0	0	0	0	0	0	0	0	0	0	0	0	0	0	0	0	0	0	0	0	0	0	0	0
9182305	2017-10-10	06:38:00	2	24	4	1	1		CHARCOAL				0	1	0	0		RIGHT ANKLE PAIN	112	78	108	98	36.4	23.6943	0	1	0	0	0	0	0	0	0	0	0	0	0	0	0	0	0	0	0	0	0	0	0	0	0
9182308	2017-10-10	08:29:00	2	27	4	1	1		CHARCOAL				0	1	0	0		RIGHT LEG PAIN AND SWELLING/RIGHT ANKLE PAIN	151	85	109	98	36.6	24.3496	0	1	0	0	0	0	0	0	0	0	0	0	0	0	0	0	0	0	0	0	0	0	0	0	0
9182312	2017-10-10	08:10:00	2	21	4	0	1		FIREWOOD				0	0	0	0		RIGHT LEG BLEEDING	122	64	85	99	36.2	26.1857	0	0	0	0	0	0	0	0	0	0	0	0	0	0	0	0	0	0	0	1	0	0	0	0	0
9182318	2017-10-10	09:54:00	2	22	4	0	1		CHARCOAL				0	1	0	0		SENSATION OF FOREIGN BODY IN RIGHT EAR	135	81	75	96	36.4	21.5019	0	0	0	0	0	0	0	0	0	0	0	1	0	0	0	0	0	0	0	0	0	0	0	0	0
9182321	2017-10-10	10:24:00	2	29	4	0	1	0	CHARCOAL	0	0	1	0	1	0	0		LEFT FOOT PAIN	111	77	106	98	36.1	20.1092	0	0	0	0	0	0	0	0	0	0	0	0	0	0	0	0	0	0	0	1	0	0	0	0	0
9182327	2017-10-10	17:01:00	2	50	4	1	1	0	CHARCOAL	1	0	0	0	1	0	0		HEAD PAIN/PALPITATIONS	219	131	99	99	35.7	24.5089	0	0	0	0	0	0	0	0	0	0	0	1	0	0	0	0	0	0	0	0	0	0	0	0	0
9182344	2017-10-11	08:40:00	2	57	4	0	1		FIREWOOD				0	1	0	0		CHEST PAIN	149	80	73	96	36.6	18.7305	0	0	0	0	0	0	0	0	1	0	0	0	0	0	0	0	0	0	0	0	0	0	0	0	0
9182348	2017-10-11	08:52:00	2	37	4	1	1	0	CHARCOAL	0	0	1	0	1	0	0		ABDOMINAL PAIN/HEADACHE	111	84	86	98	36.3	21.2874	0	0	0	0	0	0	0	0	0	0	0	0	0	0	0	0	0	0	0	0	0	0	0	0	0
9182356	2017-10-11	10:33:00	2	27	4	0	1	0	CHARCOAL	0	0	1	0	0	0	0		RIGHT SHOULDER PAIN	115	66	93	98	36.7	21.0772	0	0	0	0	0	0	0	0	1	0	0	0	0	0	0	0	0	0	0	0	0	0	0	0	0
9182360	2017-10-11	11:29:00	2	20	4	1	1		CHARCOAL				0	1	0	0		ANKLE PAIN	106	73	88	98	36.4	24.2382	0	1	0	0	0	0	0	0	0	0	0	0	0	0	0	0	0	0	0	0	0	0	0	0	0
9182362	2017-10-11	12:21:00	2	30	4	0	1		CHARCOAL				0	1	0	0		HEAD PAIN/CERVICAL SPINE PAIN	112	74	93	98	36.5	23.0518	0	0	0	0	0	0	0	0	0	0	0	0	0	0	0	0	0	0	0	0	0	0	0	0	0
9182371	2017-10-11	17:03:00	2	22	4	0	1		CHARCOAL				0	1	0	0		LEFT KNEE PAIN	142	78	98	98	36.6	17.3589	0	0	0	0	0	0	0	0	0	0	0	0	0	0	0	0	0	1	0	0	0	0	0	0	0
9182384	2017-10-12	08:50:00	2	67	4	0	1	0	FIREWOOD+CHARCOAL	0	1	0	0	1	0	0		RIGHT LEG INFECTED WOUND	132	75	117	99	35.6	19.8791	0	0	0	0	1	0	0	0	0	0	0	0	0	0	0	0	0	0	0	0	0	0	0	0	0
9182395	2017-10-12	12:28:00	2	34	4	0	1		CHARCOAL+FIREWOOD				1	1	0	0		LEFT EYE PAIN	135	71	66	98	36.6	21.25	0	0	0	0	0	0	0	0	0	0	0	1	0	0	0	0	0	0	0	0	0	0	0	0	0
9182398	2017-10-12	09:33:00	2	34	4	0	1		CHARCOAL				0	1	0	0		LEFT SHOULDER DISLOCATION	140	87	80	97	37.3	23.7769	0	0	0	0	0	0	0	0	0	0	0	0	1	0	0	0	0	0	0	0	0	0	0	0	0
9182410	2017-10-12	21:26:00	2	37	4	1	1		CHARCOAL				0	0	0	0		VERTEBRAL COLUMN PAIN POST VEHICLE ACCIDENT	106	70	101	98	36.1	39.0835	0	0	0	0	0	0	0	0	0	0	0	0	0	0	0	0	0	0	0	0	0	0	0	0	0
9182413	2017-10-13	06:03:00	2	39	4	0	1	0	CHARCOAL	0	0	1	0	1	0	0		FALL INTO HOLE	132	84	82	99	36	21.2277	0	0	0	1	0	0	0	0	0	0	0	0	0	0	0	0	0	0	0	0	0	0	0	0	0
9182416	2017-10-13	07:40:00	2	32	4	1	1		CHARCOAL				0	1	0	0		LEFT SHOULDER PAIN	151	97	77	98	36.4	24.5578	0	0	0	0	0	0	0	0	1	0	0	0	0	0	0	0	0	0	0	0	0	0	0	0	0
9182425	2017-10-13	10:16:00	2	51	4	1	1		CHARCOAL+FIREWOOD				0	1	0	0		ALLERGY	113	78	69	98	36.1	26.1719	0	0	0	0	0	0	0	0	0	0	0	0	0	0	0	0	0	0	0	0	0	0	0	0	0
9182430	2017-10-13	11:16:00	2	40	4	1	1		CHARCOAL				0	1	0	0		LEFT WRIST PAIN	163	110	102	98	36.8	33.3083	0	0	0	0	0	0	0	0	0	0	0	0	0	0	0	1	0	0	0	0	0	0	0	0	0
9182431	2017-10-13	11:26:00	2	73	4	1	1		FIREWOOD				0	1	0	0		CHEST PAIN	169	95	74	97	36.1	21.4031	0	0	0	0	0	0	0	0	0	0	0	0	1	0	0	0	0	0	0	0	0	0	0	0	0
9182432	2017-10-13	11:56:00	2	34	4	1	1		CHARCOAL				0	1	0	0		EXCORIATIONS	114	72	99	99	37	17.6309	0	0	0	0	0	0	0	0	0	0	0	0	0	0	0	0	0	0	0	0	0	0	0	0	0
9182457	2017-10-14	08:56:00	2	21	4	0	1		CHARCOAL				0	1	0	0		FOREIGN BODY RIGHT EYE	128	81	74		36.6	19.8177	0	0	0	0	0	0	0	0	0	0	0	1	0	0	0	0	0	0	0	0	0	0	0	0	0
9182464	2017-10-14	11:43:00	2	37	4	0	1		CHARCOAL				0	1	0	0		LEFT FOOT PAIN	140	93	96		35.8	25.2454	0	0	0	0	0	0	0	0	0	0	0	0	0	0	0	0	0	0	0	1	0	0	0	0	0
9182478	2017-10-14	19:46:00	2	39	4	0	1		CHARCOAL				0	1	0	0		LEFT LEG PAIN	137	90	60	99	35.8	28.7197	0	0	0	0	0	0	0	0	0	0	0	0	0	0	0	0	0	0	0	1	0	0	0	0	1
9182480	2017-10-14	20:20:00	2	58	4	0	1	0	CHARCOAL	1	0	0	0	1	0	0		WOUND	198	114	101	95	35.2	35.5129	0	0	0	0	0	0	0	0	0	0	0	1	0	0	0	0	0	0	0	0	0	0	0	0	0
9182487	2017-10-15	07:59:00	2	25	4	0	1		CHARCOAL				0	0	0	0		AGGRESSION	110	68	79	98	36.6	23.312	0	1	0	0	0	0	0	0	0	0	0	1	0	0	0	0	0	0	0	1	0	0	0	0	0
9182523	2017-10-15	19:58:00	2	26	4	0	1		CHARCOAL				0	1	0	0		LEFT KNEE PAIN	138	82	100	98	36.6	13.487	0	0	0	0	0	0	0	0	0	0	0	0	0	0	0	0	0	1	0	0	0	0	0	0	0
9182524	2017-10-15	20:08:00	2	34	4	0	1		CHARCOAL				0	1	0	0		HEAD WOUND	158	101	94	96	36	21.3763	0	0	0	0	0	0	0	0	0	0	0	0	0	0	0	0	0	0	0	0	0	0	0	0	0
9182536	2017-10-16	06:44:00	2	33	4	1	1	0	CHARCOAL	0	0	1	0	1	0	0		RIGHT WRIST PAIN	128	79	83	98	35.9	23.9501	0	0	0	0	0	0	0	0	0	0	0	0	0	1	0	0	0	0	0	0	0	0	0	0	0
9182539	2017-10-16	07:43:00	2	64	4	0	1		CHARCOAL				0	0	0	0		CHEST PAIN	139	88	67	99	33.9	24.7934	0	0	0	0	0	0	0	0	0	0	0	0	1	0	0	0	0	0	0	0	0	0	0	0	0
9182542	2017-10-16	08:17:00	2	49	4	1	1		FIREWOOD				0	0	0	0		RIGHT SHOULDER PAIN	153	89	108	98	35.4	18.6981	0	0	0	0	0	0	0	0	1	0	0	0	0	0	0	0	0	0	0	0	0	0	0	0	0
9182546	2017-10-16	09:01:00	2	65	4	1	1		CHARCOAL				0	0	0	0		RIGHT LEG PAIN	199	99	114	99	35.4	33.3333	0	0	1	0	0	0	0	0	0	0	0	0	0	0	0	0	0	0	0	0	0	0	0	0	0
9182583	2017-10-16	20:52:00	2	29	4	0	1	0	CHARCOAL	0	0	0	0	0	0	0		CHEST PAIN	143	82	92	98	35.8	26.0614	0	0	0	0	0	0	0	0	0	0	0	1	0	0	0	0	0	0	0	0	0	0	0	0	0
9182584	2017-10-16	21:42:00	2	24	4	1	1	0	CHARCOAL	0	1	1	0	1	0	0		LEFT EYE PAIN	119	73	106	97	37	19.5204	0	0	0	0	0	0	0	0	0	0	0	1	0	0	0	0	0	0	0	0	0	0	0	0	0
9182592	2017-10-17	06:16:00	2	20	4	0	1		CHARCOAL				0	1	0	0		PIMPLES ON PUBIS	132	95	88	99	35.7	22.1797	0	0	0	0	0	0	0	0	0	0	0	0	0	0	0	0	0	0	0	0	0	0	0	0	0
9182593	2017-10-17	06:25:00	2	31	4	0	1		CHARCOAL				0	1	0	0		KNEE PAIN	122	74	74	98	36.2	27.6134	0	0	0	1	0	0	0	0	0	0	0	0	0	0	0	0	0	0	0	0	0	0	0	0	0
9182602	2017-10-17	08:49:00	2	30	4	1	1		CHARCOAL				0	0	0	0		CHEST PAIN	126	73	61	99	36.2	22.742	0	0	0	0	0	0	0	0	0	1	0	0	0	0	0	0	0	0	0	0	0	0	0	0	0
9182606	2017-10-17	09:35:00	2	47	4	0	1	0	CHARCOAL+GAS	1	0	0	0	1	0	0		RIGHT FOOT PAIN	148	94	77	98	36.6	27.4614	0	1	0	0	0	0	0	0	0	0	0	0	0	0	0	0	0	0	0	0	0	0	0	0	0
9182612	2017-10-17	09:52:00	2	28	4	0	1		CHARCOAL				0	0	0	0		LEFT RING FINGER WOUND	132	77	99	97	35.3	22.3371	0	0	0	0	0	0	0	0	0	0	0	0	0	0	0	1	0	0	0	0	0	0	0	0	0
9182619	2017-10-17	11:08:00	2	35	4	1	1		CHARCOAL				0	1	0	0		TRAUMA	128	84	94	99	36.2	29.4667	0	1	0	0	0	0	0	0	0	0	0	0	0	0	0	0	0	0	0	0	0	0	0	0	0
9182621	2017-10-17	11:24:00	2	38	4	1	1		CHARCOAL				0	1	0	0		LEFT RING FINGER PAIN	125	86	107	99	36.3	33.425	0	0	0	0	0	0	0	0	0	0	0	0	0	0	0	1	0	0	0	0	0	0	0	0	0
9182626	2017-10-17	12:00:00	2	42	4	1	1		CHARCOAL				0	1	0	0		RIGHT ANKLE PAIN	121	74	79	98	36.6	35.1538	0	1	0	0	0	0	0	0	0	0	0	0	0	0	0	0	0	0	0	0	0	0	0	0	0
9182628	2017-10-17	12:37:00	2	25	4	1	1		CHARCOAL				1	0	0	0		WRIST PAIN/ELBOW PAIN	107	76	77	99	37.3	34.4132	0	0	0	0	0	0	1	0	0	0	0	0	0	0	0	0	0	0	0	0	0	0	0	0	0
9182639	2017-10-17	17:26:00	2	30	4	0	1	0	FIREWOOD	0	1	0	0	1	0	0		INCISED WOUND	153	86	109	97	36.8	22.1443	0	0	0	0	0	0	0	0	0	0	0	0	0	0	0	0	0	0	0	0	0	0	0	1	0
9182653	2017-10-18	06:28:00	2	43	4	1	1		CHARCOAL				0	0	0	0		LEFT FOOT PAIN	122	68	95	98	36.8	34.103	0	0	0	0	0	0	0	0	0	0	0	0	0	0	0	0	0	0	0	1	0	0	0	0	0
9182659	2017-10-18	08:35:00	2	37	4	0	1		CHARCOAL				0	0	0	0		LEFT SHOULDER PAIN	118	90	124	99	36.4	28.6421	0	0	0	0	0	0	0	0	0	0	0	0	1	0	0	0	0	0	0	0	0	0	0	0	0
9182675	2017-10-18	09:07:00	2	24	4	1	1	0	CHARCOAL	0	0	0	0	0	0	0		CHEST PAIN	112	80	119	99	36.4	18.0129	0	0	0	0	0	0	0	0	0	1	0	0	0	0	0	0	0	0	0	0	0	0	0	0	0
9182682	2017-10-18	10:00:00	2	42	4	1	1	0	CHARCOAL	0	0	1	0	0	0	0		WHOLE BODY PAIN	97	57	104	99	36.7	19.5159	0	0	0	0	0	0	0	0	0	0	0	0	0	0	0	0	0	0	0	0	0	0	0	0	0
9182684	2017-10-18	10:17:00	2	31	4	0	1		CHARCOAL				0	0	0	0		RIGHT FOOT PAIN	122	66	68	98	36.2	23.4173	0	1	0	0	0	0	0	0	0	0	0	0	0	0	0	0	0	0	0	0	0	0	0	0	0
9182685	2017-10-18	10:33:00	2	53	4	1	1	0	CHARCOAL+FIREWOOD	1	0	0	0	0	0	0		RIGHT CLAVICLE PAIN	179	99	90	99	36.1	20.9233	0	0	0	0	0	0	0	0	1	0	0	0	0	0	0	0	0	0	0	0	0	0	0	0	0
9182692	2017-10-18	13:22:00	2	50	4	0	1	0	CHARCOAL	0	0	1	0	0	0	0		LEFT KNEE PAIN	114	77	75	99	36.3	27.7778	0	0	0	0	0	0	0	0	0	0	0	0	0	0	0	0	0	1	0	0	0	0	0	0	0
9182697	2017-10-18	15:18:00	2	28	4	1	1	0	CHARCOAL	1	1	0	0	0	0	0		LEFT ANKLE PAIN	116	85	112	98	36.4	33.9689	0	0	0	0	0	0	0	0	0	0	0	0	0	0	0	0	0	0	0	1	0	0	0	0	0
9182707	2017-10-18	20:10:00	2	38	4	0	1		CHARCOAL				0	1	0	0		LEFT ANKLE PAIN	107	69	80	99	37	24.1206	0	0	0	0	0	0	0	0	0	0	0	0	0	0	0	0	0	0	0	1	0	0	0	0	0
9182727	2017-10-19	08:30:00	2	40	4	1	1		CHARCOAL				0	0	0	0		RIGHT ANKLE PAIN	148	79	59	98	35.9	23.3176	0	1	0	0	0	0	0	0	0	0	0	0	0	0	0	0	0	0	0	0	0	0	0	0	0
9182729	2017-10-19	08:48:00	2	34	4	0	1		CHARCOAL				0	1	0	0		FOOT WOUND FROM COBRA BITE	147	83	98	98	36.1	23.2735	0	0	0	0	0	0	0	0	0	0	0	0	0	0	0	0	0	0	0	0	0	0	0	0	0
9182731	2017-10-19	09:03:00	2	23	4	1	1	0	CHARCOAL	1	0	0	0	0	0	0		ALLERGY	123	83	96	98	36.8	24.8889	0	0	0	0	0	0	0	0	0	0	0	0	0	0	0	0	0	0	0	0	0	0	0	0	0
9182753	2017-10-19	16:40:00	2	28	4	0	1	0	CHARCOAL	1	0	0	0	0	0	0		RIGHT INDEX FINGER TRAUMA	130	88	74	99	37.3	20.2947	0	0	0	0	0	1	0	0	0	0	0	0	0	0	0	0	0	0	0	0	0	0	0	0	0
9182773	2017-10-20	09:30:00	2	39	4	1	1		CHARCOAL				0	0	0	0		RIGHT LEG PAIN	112	82	82	99	37	27.0538	1	0	1	0	0	0	0	0	0	0	0	0	0	0	0	0	0	0	0	0	0	0	0	0	0
9182776	2017-10-20	09:01:00	2	59	4	0	1		FIREWOOD				0	1	0	0		LEFT SHOULDER PAIN	156	82	99	99	37.1	27.86	0	0	0	0	0	0	0	0	0	0	0	0	1	0	0	0	0	0	0	0	0	0	0	0	0
9182790	2017-10-20	14:11:00	2	34	4	0	1	0	CHARCOAL	0	1	0	0	0	0	0		HEAD WOUND	123	81	115	95	37.3	33.0521	0	0	0	0	0	0	0	0	0	0	0	1	0	0	0	0	0	0	0	1	0	0	0	0	0
9182804	2017-10-20	20:44:00	2	38	4	0	1		FIREWOOD				0	0	0	0		LEG PAIN	154	100	70	99	36.8	27.2159	0	0	0	0	0	0	0	0	0	0	0	0	0	0	0	0	0	0	0	0	0	0	0	0	0
9182811	2017-10-21	00:01:00	2	53	4	0	1		CHARCOAL				0	1	0	0		WOUND	121	62	119	98	36.6	26.3329	0	0	0	0	0	0	0	0	0	0	0	0	0	0	0	0	0	0	0	0	0	0	0	0	0
9182827	2017-10-21	10:21:00	2	25	4	0	1		CHARCOAL				0	1	0	0		WOUND/LEG PAIN	128	71	72	99	36.5	20.8457	0	0	0	0	0	0	0	0	0	0	0	0	0	0	0	0	0	0	0	0	0	0	0	0	0
9182869	2017-10-21	23:16:00	2	43	4	0	1		CHARCOAL				0	1	0	0		WOUND	120	85	98	99	36.2	48.6111	1	0	0	0	0	0	0	0	0	0	0	1	0	0	0	0	0	0	0	0	0	0	0	0	0
9182870	2017-10-21	23:47:00	2	29	4	1	1		CHARCOAL+FIREWOOD				0	1	0	0		LUMBAR SPINE PAIN	108	90	100	98	36.2	10.6667	1	0	0	0	0	0	0	0	0	0	0	0	0	0	0	0	0	0	0	0	0	0	0	0	0
9182873	2017-10-22	05:47:00	2	22	4	1	1		CHARCOAL				0	1	0	0		LEFT SHOULDER PAIN	103	90	116	99	36.6	28.3604	0	0	0	0	0	0	0	0	0	0	0	0	1	0	0	0	0	0	0	0	0	0	0	0	0
9182877	2017-10-22	07:33:00	2	28	4	0	1	0	CHARCOAL	0	0	0	0	0	0	0		RIGHT FOREARM PAIN	139	91	64	98	36.2	30.4832	0	0	0	0	0	1	0	0	0	0	0	0	0	0	0	0	0	0	0	0	0	0	0	0	0
9182885	2017-10-22	08:45:00	2	24	4	1	1		CHARCOAL				0	0	0	0		ELBOW PAIN	124	82	116	93	37	21.1949	0	0	0	0	0	0	1	0	0	0	0	0	0	0	0	0	0	0	0	0	0	0	0	0	0
9182889	2017-10-22	09:40:00	2	33	4	1	1		CHARCOAL				0	0	0	0		LEFT SHOULDER PAIN	129	79	86	99	37.1	27.0968	0	0	0	0	0	0	0	0	0	0	0	0	1	0	0	0	0	0	0	0	0	0	0	0	0
9182900	2017-10-22	13:18:00	2	33	4	1	1	0	CHARCOAL	1	0	1	0	0	0	0		TRAFFIC ACCIDENT	151	103	84	99	36.2	21.4908	0	1	0	0	0	0	0	0	0	0	0	0	0	0	0	0	0	0	0	0	0	0	0	0	0
9182906	2017-10-22	15:35:00	2	30	4	1	1	1	CHARCOAL	0	1	0	0	1	0	0		PHYSICAL AGGRESSION	130	80	75	99	36.8	22.8545	0	0	0	0	0	0	0	0	0	0	0	0	0	0	0	0	0	0	0	0	0	0	0	0	0
9182910	2017-10-22	16:45:00	2	29	4	0	1		CHARCOAL+ELECTRICITY				0	0	0	0		AGGRESSION	147	74	62	97	37.3	25.8196	0	0	0	0	0	0	0	0	0	0	0	1	0	0	0	0	0	0	0	0	0	0	0	0	0
9182915	2017-10-22	17:40:00	2	23	4	0	1		CHARCOAL				0	0	0	0		FALL	121	67	87	98	36	21.6379	0	0	0	0	0	0	0	0	0	0	0	1	0	0	0	0	0	0	0	0	0	0	0	0	0
9182923	2017-10-22	20:24:00	2	45	4	1	1	1	CHARCOAL	0	0	0	0	0	0	0		PHYSICAL AGGRESSION	122	75	90	98	36.3	16.2109	0	0	0	0	0	0	0	0	0	0	0	0	0	0	0	1	0	0	0	0	0	0	0	0	0
9182942	2017-10-23	08:09:00	2	66	4	0	1	0	CHARCOAL	1	0	0	0	0	0	0		LEFT SHOULDER PAIN	143	66	72	99	36.2	22.4103	0	0	0	0	0	0	0	0	0	0	0	0	0	0	0	0	0	0	0	0	0	0	0	0	0
9182945	2017-10-23	08:38:00	2	26	4	0	1	0	CHARCOAL	1	0	0	0	0	0	0		FOREIGN BODY IN RIGHT EAR	122	77	88	98	35.6	21.4421	0	0	0	0	0	0	0	0	0	0	0	1	0	0	0	0	0	0	0	0	0	0	0	0	0
9182975	2017-10-23	16:06:00	2	36	4	0	1		CHARCOAL				0	0	0	0		ANKLE PAIN	127	79	76	99	36.3	21.848	0	0	0	0	0	0	0	0	0	0	0	0	0	0	0	0	0	0	0	0	0	0	0	0	0
9182990	2017-10-23	22:17:00	2	30	4	1	1		CHARCOAL+FIREWOOD				0	1	0	0		RIGHT FOOT PAIN	111	68	95	98	36.7	28.5585	0	1	0	0	0	0	0	0	0	0	0	0	0	0	0	0	0	0	0	0	0	0	0	0	0
9182997	2017-10-24	08:16:00	2	28	4	0	1	0	CHARCOAL	1	0	0	0	0	0	0		RIGHT SHOULDER PAIN	151	83	80	99	36.2	21.3224	0	0	0	0	0	0	0	0	1	0	0	0	0	0	0	0	0	0	0	0	0	0	0	0	0
91821002	2017-10-24	08:55:00	2	21	4	1	1		CHARCOAL				0	0	0	0		FOREIGN BODY IN THROAT	107	69	76	99	36.4	25.2941	0	0	0	0	0	0	0	0	0	0	0	0	0	0	0	0	0	0	0	0	0	0	0	0	0
91821009	2017-10-24	10:00:00	2	25	4	0	1		CHARCOAL				0	0	0	0		PHYSICAL AGGRESSION	131	76	111	98	37.1	20.4695	0	0	0	0	0	0	0	0	0	0	0	0	0	0	0	0	0	0	0	0	0	0	0	0	0
91821012	2017-10-24	10:35:00	2	29	4	1	1	0	CHARCOAL	1	0	0	0	0	0	0		RIGHT ANKLE PAIN	118	87	76	99	35.7	30.8429	0	1	0	0	0	0	0	0	0	0	0	0	0	0	0	0	0	0	0	0	0	0	0	0	0
91821040	2017-10-24	20:03:00	2	36	4	0	1		CHARCOAL				0	1	0	0		RIGHT FOOT WOUND	158	93	67	99	35.8	24.6875	0	1	0	0	0	0	0	0	0	0	0	0	0	0	0	0	0	0	0	0	0	0	0	0	0
91821041	2017-10-24	21:00:00	2	31	4	0	1	0	CHARCOAL	0	0	0	0	1	0	0		RIGHT KNEE PAIN AND EXCORIATIONS	160	98	77	98	37	24.1322	0	0	0	1	0	0	0	0	0	0	0	0	0	0	0	0	0	0	0	0	0	0	0	0	0
91821067	2017-10-25	09:18:00	2	29	4	0	1		CHARCOAL				0	1	0	0		ALLERGY	141	85	72	98	36.6	29.5156	0	0	0	0	0	0	0	0	0	0	0	0	0	0	0	0	0	0	0	0	0	0	0	0	0
91821068	2017-10-25	09:35:00	2	20	4	0	1		CHARCOAL				0	1	0	0		PAIN IN THE RIGHT KNEE	138	78	83	99	36.7	20.7612	0	0	0	1	0	0	0	0	0	0	0	0	0	0	0	0	0	0	0	0	0	0	0	0	0
91821071	2017-10-25	11:11:00	2	43	4	0	1		CHARCOAL				0	0	0	0		RIGHT THIGH PAIN	148	90	58	99	37	22.6536	0	0	0	0	1	0	0	0	0	0	0	0	0	0	0	0	0	0	0	0	0	0	0	0	0
91821080	2017-10-25	12:53:00	2	26	4	0	1		CHARCOAL				0	1	0	0		LEFT ANKLE WOUND	103	67	61	97	36.5	19.1832	0	0	0	0	0	0	0	0	0	0	0	0	0	0	0	0	0	0	0	1	0	0	0	0	0
91821090	2017-10-25	20:00:00	2	21	4	0	1		CHARCOAL				0	1	0	0		FACE WOUND	143	81	108	97	37.3	21.875	0	0	0	0	0	0	0	0	0	0	0	1	0	0	0	0	0	0	0	0	0	0	0	0	0
91821101	2017-10-26	07:00:00	2	25	4	0	1	1	CHARCOAL	0	0	0	0	1	0	0		LEFT LEG WOUND	126	86	58	98	36.7	22.3183	0	0	0	0	0	0	0	0	0	0	0	0	0	0	0	0	0	0	1	0	0	0	0	0	0
91821106	2017-10-26	08:58:00	2	36	4	0	1	1	FIREWOOD	1	0	0	0	1	0	0		ALLERGY/HEAD PAIN	155	91	85	99	37	30.2185	0	0	0	0	0	0	0	0	0	0	0	0	0	0	0	0	0	0	0	0	0	0	0	0	0
91821114	2017-10-26	11:21:00	2	21	4	1	1	0	CHARCOAL	1	0	0	0	0	0	0		HEAD PAIN/NECK PAIN/LEFT ANKLE PAIN	165	114	99	98	37.6	36.6837	0	0	0	0	0	0	0	0	0	0	0	0	0	0	0	0	0	0	0	0	0	0	0	0	0
91821117	2017-10-26	12:07:00	2	27	4	1	1		CHARCOAL				0	0	0	0		LEFT KNEE PAIN	116	65	67	99	37	28.7172	0	0	0	0	0	0	0	0	0	0	0	0	0	0	0	0	0	1	0	0	0	0	0	0	0
91821130	2017-10-26	19:53:00	2	27	4	1	1	0	CHARCOAL	0	0	1	0	0	0	0		PHYSICAL AGGRESSION	102	67	91	99	37	24.4898	0	0	0	0	0	0	0	0	0	0	0	0	0	0	0	0	0	0	0	0	0	0	0	0	0
91821133	2017-10-26	21:00:00	2	26	4	1	1		CHARCOAL				0	0	0	0		FALL	125	67	77	99	36.4	22.1519	0	0	0	0	0	0	0	0	1	0	0	0	0	0	0	0	0	0	0	0	0	0	0	0	0
91821139	2017-10-27	05:23:00	2	25	4	0	1	1	CHARCOAL	0	0	0	0	0	0	0		FALL	127	84	65	99	35.6	24.5703	0	0	0	0	0	0	0	1	0	0	0	0	0	0	0	0	0	0	0	0	0	0	0	0	0
91821170	2017-10-27	12:50:00	2	25	4	1	1	0	CHARCOAL	0	0	0	0	0	0	0		LEFT ANKLE PAIN	117	66	70	99	36.6	25.4501	0	0	0	0	0	0	0	0	0	0	0	0	0	0	0	0	0	0	0	1	0	0	0	0	0
91821176	2017-10-27	14:11:00	2	21	4	0	1	0	CHARCOAL	1	0	0	0	0	0	0		LEFT FOOT PAIN AFTER TRAFFIC ACCIDENT	136	85	119	99	36	26.5047	0	0	0	0	0	0	0	0	0	0	0	0	0	0	0	0	0	0	0	1	0	0	0	0	0
91821189	2017-10-27	20:40:00	2	20	4	1	1		CHARCOAL+FIREWOOD				0	1	0	0		FOREIGN BODY IN LEFT EAR	117	68	88	99	36.9	25.2337	0	0	0	0	0	0	0	0	0	0	0	1	0	0	0	0	0	0	0	0	0	0	0	0	0
91821219	2017-10-28	14:08:00	2	43	4	0	1		CHARCOAL+GAS				0	1	0	0		BODY ACHE	144	99	89	99	36.4	25.5035	0	0	0	0	1	0	1	0	0	0	0	0	0	0	0	0	0	1	0	0	0	0	0	0	0
91821229	2017-10-28	17:31:00	2	36	4	0	1	0	CHARCOAL	1	1	0	0	1	0	0		LEFT LEG PAIN	136	87	102		38.4	22.0312	0	0	0	0	0	0	0	0	0	0	0	0	0	0	0	0	0	0	1	0	0	0	0	0	0
91821237	2017-10-28	22:51:00	2	23	4	0	1		CHARCOAL				0	1	0	0		LEFT KNEE PAIN	131	71	87		36.6	26.6188	0	0	0	0	0	0	0	0	0	0	0	0	0	0	1	0	0	1	0	0	0	0	0	0	0
91821239	2017-10-29	05:46:00	2	24	4	0	1		CHARCOAL				0	1	0	0		LEFT WRIST PAIN	121	64	68		36.9	22.8099	0	0	0	0	0	0	0	0	0	0	0	0	0	0	0	1	0	0	0	0	0	0	0	0	0
91821240	2017-10-29	06:02:00	2	21	4	1	1		CHARCOAL				0	1	0	0		WHOLE BODY PAIN	124	79	93		37.1	22.2715	0	0	0	0	0	0	0	0	0	0	0	0	0	0	0	0	0	0	0	0	0	0	0	0	0
91821242	2017-10-29	07:59:00	2	20	4	1	1	0	CHARCOAL	0	1	0	0	0	0	0		PHYSICAL AGGRESSION	125	91	101	98	36.5	21.3495	0	0	0	0	0	0	0	0	0	0	0	0	0	0	0	1	0	0	0	0	0	0	0	0	0
91821245	2017-10-29	08:34:00	2	22	4	1	1		CHARCOAL				0	0	0	0		FALL PLAYING FOOTBALL							0	0	0	0	0	1	0	0	0	0	0	0	0	0	0	0	0	0	0	0	0	0	0	0	0
91821250	2017-10-29	09:37:00	2	23	4	1	1	0	CHARCOAL	1	0	0	0	0	0	0		FALL	144	95	57	99	36.5	24.3496	0	0	0	0	0	0	0	0	0	0	0	0	0	0	0	0	0	0	0	1	0	0	0	0	0
91821251	2017-10-29	09:49:00	2	40	4	1	1	1		0	0	0	0	0	0	0		PHYSICAL AGGRESSION	83	64	85	98	36.6	35.551	0	0	0	0	0	0	0	0	0	0	0	0	0	0	0	0	0	1	0	0	0	0	0	0	0
91821265	2017-10-29	14:51:00	2	31	4	0	1		CHARCOAL				0	0	0	0		TRAFFIC ACCIDENT	122	75	80	98	37.1	31.1073	0	0	0	0	0	0	0	0	0	1	0	0	0	0	0	0	0	0	0	0	0	0	0	0	0
91821276	2017-10-29	21:23:00	2	27	4	1	1		GAS				0	1	0	0		HEAD PAIN/NECK PAIN	105	63	90		36.6	20.6891	0	0	0	0	0	0	0	0	0	0	0	0	0	0	0	0	0	0	0	0	0	0	0	0	0
91821278	2017-10-30	04:52:00	2	55	4	0	1		CHARCOAL				0	1	0	0		CHEST PAIN	126	77	59		36	23.634	0	0	0	0	0	0	0	0	0	1	0	0	0	0	0	0	0	0	0	0	0	0	0	0	0
91821283	2017-10-30	07:46:00	2	38	4	0	1	0	CHARCOAL	0	0	0	0	0	0	0		LEFT FOREARM PAIN	116	66	63	99	36.2	30.0259	0	0	0	0	0	0	0	0	0	0	0	0	0	0	0	1	0	0	0	0	0	0	0	0	0
91821296	2017-10-30	09:37:00	2	35	4	1	1	0	CHARCOAL	0	0	0	0	1	0	0		LEFT ARM PAIN	118	81	91		37	5.99934	0	0	0	0	0	0	0	0	0	0	0	0	0	0	1	0	0	0	0	0	0	0	0	0	0
91821329	2017-10-31	05:53:00	2	26	4	1	1		CHARCOAL				0	1	0	0		LEFT MIDDLE FINGER PAIN/RIGHT FOREARM WOUND	109	88	68	77	37.2	19.8962	0	0	0	0	0	1	0	0	0	0	0	0	0	0	0	0	0	0	0	0	0	0	0	0	0
240330	2017-04-13	17:30:00	2	29	4	1	1	0	CHARCOAL	0	0	0	0	1	0	0		SUDDEN FALL	121	63	98	99	36.2	17.3238	0	0	0	0	0	0	0	0	0	0	0	0	0	0	0	0	0	0	0	0	0	0	0	0	0
260337	2017-04-15	09:30:00	2	25	4	0	1	0	CHARCOAL	0	0	0	0	1	0	0		PHYSICAL AGGRESSION	115	78	93	98	36.6	19.3452	0	0	0	0	0	0	0	0	0	0	0	0	0	0	0	0	0	0	0	0	0	0	0	0	0
260448	2017-04-15	21:23:00	2	23	4	1	1	0	CHARCOAL	0	0	0	0	0	0	0		DIZZINESS/26 WEEKS PREGNANT	97	60	94	94	36.5	16.88	0	0	0	0	0	0	0	0	0	0	0	0	0	0	0	0	0	0	0	0	0	0	0	0	0
260465	2017-04-20	09:49:00	2	72	4	1	1	0	CHARCOAL	1	0	0	0	1	0	0		PAIN MOBILIZING SHOULDER	161	109	80	99	36.6	30	0	0	0	0	0	0	0	0	0	0	0	0	0	0	0	0	0	0	0	0	0	0	0	0	0
9182239	2017-10-08	11:17:00	2	61	4	0	1	0	CHARCOAL	1	0	1	0	0	0	0		SUDDEN FALL/WEAKNESS/CONVULSIONS	90	64	105	85	35.7	21.4906	0	0	0	0	0	0	0	0	0	0	0	0	0	0	0	0	0	0	0	0	0	0	0	0	0
9182930	2017-10-22	22:11:00	2	25	4	1	1						0	0	0	0		BLEEDING/VOMITING	115	84	89	97	36.6	18.7017	0	0	0	0	0	0	0	0	0	0	0	0	0	0	0	0	0	0	0	0	0	0	0	0	0
240185	2017-04-09	04:50:00	2	20	4	1	1	0	CHARCOAL	0	0	0	0	1	0	0		ELECTROCUTION	113	73	85	81	35.8	15.6599	0	0	0	0	0	0	0	0	0	0	0	0	0	0	0	0	0	0	0	0	0	0	0	0	0
240528	2017-04-21		2	33	4	0	1	0	CHARCOAL	0	0	0	0	1	0	0		SEXUAL ASSAULT	135	80	100	98	34.8	25.9601	0	0	0	0	0	0	0	0	0	0	0	0	0	0	0	0	0	0	0	0	0	0	0	1	0
260294	2017-04-13	23:25:00	2	28	4	1	1	0	CHARCOAL	0	0	1	1	1	0	0		HAND WOUNDS	104	74	100	99	36.4	23.9715	0	0	0	0	0	1	0	0	0	0	0	0	0	0	0	0	0	0	0	0	0	0	0	0	0
260597	2017-04-27	00:15:00	2	52	4	1	1	0	CHARCOAL+FIREWOOD	0	0	0	0	1	0	0		LEFT ARM PAIN AND SWELLING	141	93	77	98	36.2	25.7166	0	0	0	0	0	0	0	0	0	0	0	0	0	0	0	0	0	0	0	0	0	0	0	0	0
260659	2017-04-22	11:00:00	2	36	4	1	1	0	CHARCOAL	0	0	0	0	0	0	0		FEVER	136	81	78	97	37.3	23.8384	0	0	0	0	0	0	0	0	0	0	0	0	0	0	0	0	0	0	0	0	0	0	0	1	0
9182292	2017-10-09	17:34:00	2	28	4	0	1	0	CHARCOAL	0	0	0	0	0	0	0		BITE	121	76	67	98	35.2	22.4001	0	0	0	0	0	1	0	0	0	0	0	0	0	0	0	0	0	0	0	0	0	0	0	0	0
9182803	2017-10-20	20:35:00	2	31	4	1	1		CHARCOAL				0	0	0	0		BODY ACHE	110	70	110	99	36.6	20.0773	0	0	0	0	0	0	0	0	0	0	0	0	0	0	0	0	0	0	0	0	0	0	0	0	0
91821255	2017-10-29	11:32:00	2	54	4	0	1	1	CHARCOAL	1	1	0	0	0	0	0		AGGRESSION	155	96	91	98	36.4	25.8953	0	0	0	0	0	0	0	0	0	0	0	0	1	0	0	0	0	0	0	0	0	0	0	0	0
240035	2017-04-02	05:56:00	2	22	4	1	1	0	CHARCOAL	0	0	0	0	1	0	0		HEADACHE/UPPER LIMB PAIN	123	109	95	98	36	37.2577	0	0	0	0	0	0	0	0	0	0	0	0	0	0	0	0	0	0	0	0	0	0	0	0	0
240213	2017-04-11	12:30:00	2	44	4	1	1	0	CHARCOAL	1	0	0	0	1	0	0		GENERALIZED WEAKNESS/DIZZINESS	122	82	123	95	35.8	28.7148	0	0	0	0	0	0	0	0	0	0	0	0	0	0	0	0	0	0	0	0	0	0	0	0	0
[truncated: 5,810 more rows]
[truncated: 33 more columns]
